1 Genetic regulation of transcriptional variation in  
2 wild-collected *Arabidopsis thaliana* accessions

3

4 Yanjun Zan<sup>1</sup>, Xia Shen<sup>1,2,3,4</sup>, Simon K. G. Forsberg<sup>1</sup>, Örjan Carlborg<sup>1\*</sup>

5 <sup>1</sup>Department of Clinical Sciences, Division of Computational Genetics, Swedish University of  
6 Agricultural Sciences, Uppsala, Sweden

7 <sup>2</sup>Usher Institute for Population Health Sciences and Informatics, University of Edinburgh,  
8 Edinburgh, United Kingdom

9 <sup>3</sup>Department of Medical Epidemiology and Biostatistics, Karolinska Institutet, Stockholm,  
10 Sweden

11 <sup>4</sup>MRC Human Genetics Unit, MRC Institute of Genetics and Molecular Medicine, University  
12 of Edinburgh, Edinburgh, UK

13

14 \*To whom correspondence should be addressed: [orjan.carlborg@slu.se](mailto:orjan.carlborg@slu.se)

15

16

17

1 **Abstract**

2

3 An increased understanding of how genetics contributes to expression variation in  
4 natural *Arabidopsis thaliana* populations is of fundamental importance to understand  
5 adaptation. Here, we reanalyse data from two publicly available datasets with  
6 genome-wide data on genetic and transcript variation from whole-genome and  
7 RNA-sequencing in populations of wild-collected *A. thaliana* accessions. We found  
8 transcripts from more than half of all genes (55%) in the leaf of all accessions. In the  
9 population with higher RNA-sequencing coverage, transcripts from nearly all  
10 annotated genes were present in the leaf of at least one of the accessions. Thousands  
11 of genes, however, were found to have high transcript levels in some accessions and  
12 no detectable transcripts in others. The presence or absence of particular gene  
13 transcripts within the accessions was correlated with the genome-wide genotype,  
14 suggesting that part of this variability was due to a genetically controlled  
15 accession-specific expression. This was confirmed using the data from the largest  
16 collection of accessions, where cis-eQTL with a major influence on the presence or  
17 absence of transcripts was detected for 349 genes. Transcripts from 172 of these  
18 genes were present in the second, smaller collection of accessions and there, 81 of the  
19 eQTLs for these genes could be replicated. Twelve of the replicated genes, including  
20 *HAC1*, are particularly interesting candidate adaptive loci as earlier studies have  
21 shown that lack-of-function alleles at these genes have measurable phenotypic effects  
22 on the plant. In the larger collection, we also mapped 2,320 eQTLs regulating the  
23 expression of 2,240 genes that were expressed in nearly all accessions, and 636 of  
24 these replicated in the smaller collection. This study thus provides new insights to the  
25 genetic regulation of global gene-expression diversity in the leaf of wild-collected *A.*  
26 *thaliana* accessions and in particular illustrate that strong cis-acting polymorphisms  
27 are an important genetic mechanisms leading to the presence or absence of transcripts  
28 in individual accessions.

29

30 **Key words:** eQTL mapping, RNA sequencing, Gene Expression, Adaptation.

## 1 **Introduction**

2 Several earlier studies have utilized genome-wide genotype data to explore the  
3 genetic regulation adaptive phenotypes in populations of wild-collected *Arabidopsis*  
4 *thaliana* accessions (Atwell, Huang et al. 2010, Cao, Schneeberger et al. 2011). Some  
5 of the phenotypic variation in these populations is likely to be due to regulatory  
6 genetic variants in the genome. A way to potentially identify putative adaptive  
7 mutations is therefore to map genetic variants that lead to differences in gene  
8 expression (Expression Level Polymorphisms or ELPs for short), as have been done  
9 earlier in various organisms (Wang, Stec et al. 1999, Carroll 2000, Brem, Yvert et al.  
10 2002, Kliebenstein, Pedersen et al. 2002, Carneiro, Piorno et al. 2015). In *A. thaliana*,  
11 many naturally occurring ELPs with significant phenotypic changes have been  
12 reported, including semi-dwarfs (Barboza, Effgen et al. 2013), changes in  
13 flowering-time (Schwartz, Balasubramanian et al. 2009), changes in seed flotation  
14 (Saez-Aguayo, Rondeau-Mouro et al. 2014) and changes in self-incompatibility  
15 (Nasrallah, Liu et al. 2004). Extending such efforts to a whole genome and  
16 transcriptome level in large collections of natural *A. thaliana* accessions might  
17 provide useful insights to the link between genetic and expression level variation in  
18 order to ultimately reveal how this contributes to adaptation to the natural  
19 environment.

20

21 Only a few studies have explored the expression variation in natural *A. thaliana*  
22 populations. A microarray based study on shoot-tissue from two accessions, Sha and  
23 Bay-0, found that (i) 15,352 genes (64% of all tested) were expressed in the shoot in  
24 the field, (ii) 3,344 genes (14% of all tested) were differentially expressed between  
25 the accessions and (iii) 53 genes were uniquely expressed in Sha/Bay-0, respectively  
26 (Richards, Rosas et al. 2012). Using RNA-sequencing Gan *et al.* (Gan, Stegle et al.  
27 2011) studied the seedling transcriptome from 18 wild-collected accessions to reveal  
28 that 75% (20,550) of the protein-coding genes, 21% of the non-coding RNAs and 21%  
29 of the pseudogenes were expressed in the seedling tissue of at least one of the  
30 accessions. Further, they also found that 46% (9,360) of the expressed protein-coding  
31 genes were differently expressed between at least one pair of accessions (Gan, Stegle  
32 et al. 2011). Although these studies suggest that there is a considerable transcriptional  
33 variation between natural *A. thaliana* accessions, further studies are needed to obtain a

1 more complete picture about the actual variation in the worldwide *A. thaliana*  
2 population.

3

4 Expression quantitative trait loci (eQTL) mapping is a useful approach to link genetic  
5 and expression variation and a starting-point to identify the regions containing the  
6 functional ELPs. It has been successfully applied in many organisms, including yeast  
7 (Brem, Yvert et al. 2002), plants (West, Kim et al. 2007), as well as animals and  
8 humans (Schadt, Monks et al. 2003). Most eQTLs are detected in the close vicinity of  
9 the gene itself (cis-eQTL) and these often explain a large proportion of the observed  
10 expression variation (Li, Álvarez et al. 2006, Petretto, Mangion et al. 2006, Wentzell,  
11 Rowe et al. 2007). Fewer eQTL (from 20-50% reported in various organisms (Morley,  
12 Molony et al. 2004, Li, Álvarez et al. 2006, Keurentjes, Fu et al. 2007)) are located in  
13 the remainder of the genome (trans-eQTL). Using eQTL mapping, the genetic  
14 regulation of expression variation has been dissected also in *A. thaliana* using  
15 recombinant inbred lines (RIL) (Keurentjes, Fu et al. 2007, West, Kim et al. 2007)  
16 and other experimental crosses (Zhang, Cal et al. 2011). These initial studies,  
17 however, had a limited ability to dissect the genetic basis of adaptive expression  
18 variation. First, studied experimental populations that only captured a small part of  
19 the genetic diversity present in the natural *A. thaliana* population. Second, the  
20 measures of gene-expression were from microarray-data, making them indirect as  
21 they were based on quantifying the light intensity emitted after hybridizing the  
22 extracted mRNA with predesigned probes on the array. As a consequence of this,  
23 these studies were limited by the inherent drawbacks of this technology, including the  
24 low specificity of probes, the lack of specificity for different isoforms of a gene as  
25 well as experimental batch effects (Kothapalli, Yoder et al. 2002). Further, in the  
26 context of eQTL mapping, the limited detection range of the microarray  
27 measurements (i.e. the upper and lower bounds for detection of expression) make it  
28 unlikely that this data captured the full range of expression differences present in  
29 nature. Power was therefore lost in cases when the biological range of expression  
30 exceeded the detection boundaries of the array. It is now possible to quantify  
31 transcript levels using RNA sequencing (RNA-seq) instead. This facilitates eQTL  
32 mapping where expression-levels are quantified with higher precision and specificity  
33 than in the hybridization-based microarray-based approaches. Although RNA-seq has

1 its own shortcomings, such as sequence specific bias (Schwartz, Oren et al. 2011),  
2 fragment bias and amplification bias (Roberts, Trapnell et al. 2011), it is an attractive  
3 method for scoring expression in eQTL analyses as it overcomes many of the  
4 fundamental shortcomings of microarrays by directly counting reads mapped to a  
5 certain transcript (Wang, Gerstein et al. 2009). With this new technology available,  
6 several RNA-seq based eQTL mapping studies have been carried out, mostly in  
7 humans (Montgomery, Sammeth et al. 2010, Pickrell, Marioni et al. 2010, Brown,  
8 Buil et al. 2014), but also in other species including Maize (Li, Petsch et al. 2013) and  
9 Baboons (Tung, Zhou et al. 2015).

10

11 Here, we utilized a dataset generated from 144 wild-collected *Arabidopsis thaliana*  
12 (*SCHMITZ-data*; (Schmitz, Schultz et al. 2013)) to study genome-wide expression  
13 variation and the genetic regulation of gene expression. A second dataset with 107  
14 wild-collected *A. thaliana* accessions (*DUBIN-data*; (Dubin, Zhang et al. 2015)) was  
15 used to replicate and confirm the initial findings. For all accessions in both datasets,  
16 whole-genome SNP genotypes are available as part of the 1001-genomes project (Cao,  
17 Schneeberger et al. 2011) together with normalized FPKM/RPKM values from  
18 RNAseq for 33,554 (Schmitz, Schultz et al. 2013) / 33,322 (Dubin, Zhang et al. 2015)  
19 out of the 33,602 TAIR10 annotated genes. Transcripts from a core-set of genes was  
20 present in the leaf in all accessions. The total number of genes in this set was larger in  
21 the population with higher sequence coverage (Schmitz, Schultz et al. 2013), but it  
22 represented a similar proportion (55%) of all genes with detectable transcripts as in  
23 the smaller *DUBIN* (Dubin, Zhang et al. 2015) dataset. This confirmed the  
24 expectation that the ability to detect transcripts increases with the read-depth. We also  
25 found that many genes had high transcript levels in some accessions, but no  
26 transcripts at all in others. This suggests that many genes are expressed in an  
27 accession-specific manner. Such genes without detected transcripts in many  
28 accessions/individuals are, for various reasons, problematic to analyse (see Results  
29 and Discussion section). Therefore, they have often been either excluded (Brown,  
30 Buil et al. 2014), included with identical rank in non-parametric tests that avoid  
31 normality-assumptions (Montgomery, Sammeth et al. 2010) or forced into regression  
32 based analyses without addressing the non-normality (Pickrell, Marioni et al. 2010).  
33 Here, we explored whether there is a biological basis for the lack of transcripts for

1 some genes in some accessions. We found a correlation between the expression and  
2 genetic covariances between individual accessions, which strongly suggests that a  
3 fraction of this presence or absence of transcripts was under genetic control. Further,  
4 using eQTL mapping, we revealed that segregating cis-eQTL alleles were associated  
5 with this expression variation for many genes. Many of these cis-eQTL detected in  
6 the larger dataset (*SCHMITZ-data*) could be replicated in the smaller *DUBIN-data*  
7 (Dubin, Zhang et al. 2015). Also, several of them were found to be functional  
8 candidate adaptive genes as earlier work found that loss-of-function alleles at these  
9 loci had measurable effects on higher-level plant phenotypes. This study thus  
10 provides an overall perspective on the transcript-level variation in two large  
11 populations of wild-collected *A. thaliana* accessions, illustrates the importance of  
12 genetics for the presence or absence of transcripts for individual genes in individual  
13 wild-collected accessions and find that several genes with an accession-specific  
14 transcript pattern as promising functional candidate adaptive genes.

15

## 16 **Results**

### 17 ***RNA sequencing detects transcripts from nearly all TAIR10 annotated genes in the*** 18 ***leaf of wild-collected A. thaliana accessions***

19 We downloaded publicly available RNA-seq (Schmitz, Schultz et al. 2013) and  
20 whole-genome SNP genotype data (Cao, Schneeberger et al. 2011) for a population of  
21 144 wild-collected *A. thaliana* accessions (*SCHMITZ-data*). In this data, we first  
22 explored the variability in RNA-seq scored expression-values across 33,554 genes  
23 and 140 accessions that passed quality control (see Materials and Methods). A gene  
24 was considered as expressed if it had a normalized FPKM (Fragment Per Kilobase of  
25 exon per Million fragments mapped) value greater than zero. The available RNA-seq  
26 data was generated from a single tissue (leaf) and we therefore expected that a  
27 considerable proportion of the genes would be transcriptionally inactive due to tissue  
28 specific expression. The data, however, showed that among the 33,554 genes in the  
29 *SCHMITZ* data, only 289 lacked transcripts across of the accessions in the population  
30 (i.e. had a normalized FPKM = 0 in all accessions).

31

### 32 ***A core-set of genes has detectable transcripts in the leaf of all the evaluated*** 33 ***wild-collected A. thaliana accessions***

1 In the *SCHMITZ-data*, transcripts were detected (Normalized FPKM > 0) in all  
2 accessions for a large set of genes (18,289; Figure 1). In the *DUBIN-data*, 12,927  
3 genes had detectable transcripts in all accessions and all of these transcripts except 79  
4 had detectable transcripts in all of the accession in the *SCHMITZ-data* (Schmitz,  
5 Schultz et al. 2013) (Figure 1). Of the 10,549 genes for which transcripts were  
6 detected (RPKM > 0) only in some accessions in the *DUBIN-data*, transcripts were  
7 detected for 4,129 in all and 6,393 in some (RPKM > 0) accessions in the  
8 *SCHMITZ-data* (Figure 1). Hence, for only 27 genes with transcripts detected in at  
9 least one of the accessions in the *DUBIN-data*, no transcripts were detected in any of  
10 the accessions in the *SCHMITZ-data* (Figure 1). The lower sequencing coverage and  
11 more stringent filtering of the sequence reads in the *DUBIN-data* (Dubin, Zhang et al.  
12 2015) likely explains why transcripts were detected for more genes in more  
13 accessions in the *SCHMITZ-data*. Few (27) genes were uniquely expressed in the  
14 *DUBIN-data*, but we not that 13 of these are t-RNA genes and that 9 of these code for  
15 proline (Table S1).  
16

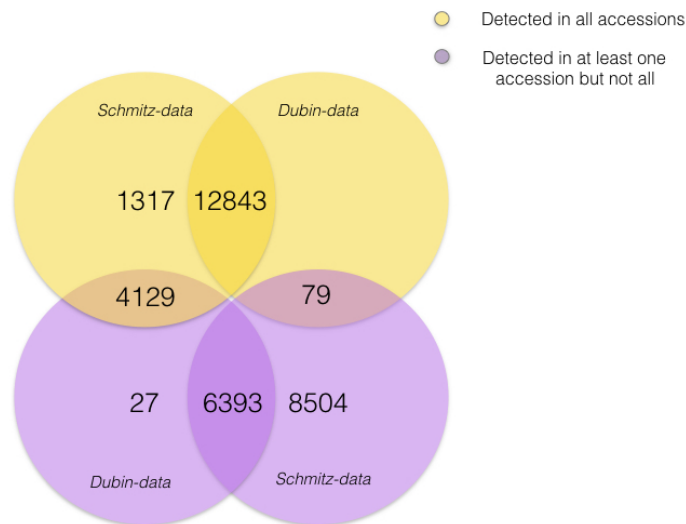

17  
18 *Figure 1. Overlap of RNA-seq scored transcripts in the leaf of 140 wild-collected A. thaliana*  
19 *accessions (Schmitz, Schultz et al. 2013) (SCHMITZ-data; Normalized FPKM > 0) and 107*  
20 *wild-collected Swedish A. thaliana accessions (Dubin, Zhang et al. 2015) (DUBIN-data; RPKM > 0).*  
21 *The numbers of detected transcripts in all accessions of the respective datasets are shown in yellow.*  
22 *The numbers of detected transcripts in at least one, but not all, of the accessions in the respective*  
23 *datasets are shown in purple.*

1

2 ***The number of genes with detected transcripts in the leaf of individual *A. thaliana****  
3 ***accessions is highly variable***

4 The number of genes for which transcripts were detected (Normalized FPKM > 0) in  
5 the individual accessions of the *SCHMITZ-data* (Schmitz, Schultz et al. 2013) was  
6 considerably lower than the total number of genes with detected transcripts in any of  
7 the accessions in the population. The number of genes with RNA-seq detected  
8 transcripts in the individual accessions (Normalized FPKM > 0) varied from 22,574  
9 to 26,967 with an average of 24,565 (Figure 2A). The proportion of genes with  
10 detected transcripts was thus higher in this dataset than that which had earlier been  
11 reported for shoots in two natural accessions (Richards, Rosas et al. 2012), but similar  
12 to that in the study of 18 natural accessions (Gan, Stegle et al. 2011) (73% in the  
13 *SCHMITZ-data*, 64% in (Richards, Rosas et al. 2012) and about 70% in (Gan, Stegle  
14 et al. 2011)). A similar pattern of variability in the number of genes with detected  
15 transcripts was also found in the DUBIN-data (Figure 2C).

16

17



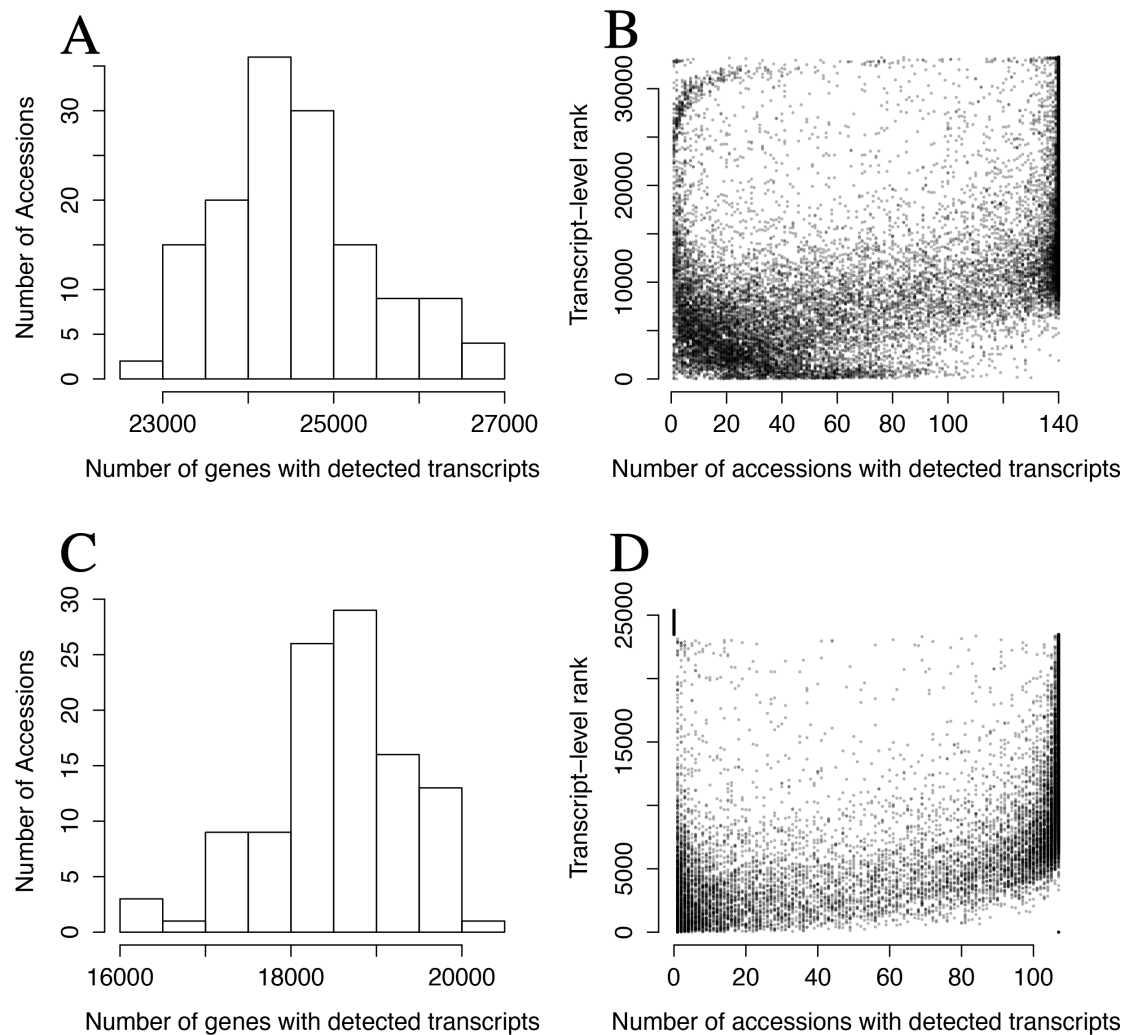

1  
2 *Figure 2. (A) Distribution of the number of genes with transcripts in the leaf of 140 wild-collected A.*  
3 *thaliana accessions (Schmitz, Schultz et al. 2013) scored by RNA-seq (Normalized FPKM > 0). (B)*  
4 *Relationship between the ranks of the average transcript levels for all genes with transcripts detected*  
5 *in at least one accession (y-axis) and the number of accessions in (Schmitz, Schultz et al. 2013) where*  
6 *transcripts for the gene is found (x-axis). Each dot in the plot represent one of the 33,265 genes with*  
7 *FPKM > 0 in at least one accession of (Schmitz, Schultz et al. 2013). The transcript-level rank is based*  
8 *on average transcript levels in the accessions where transcripts for a particular gene are detected. Due*  
9 *to this, the ranks are less precise for transcripts present in fewer accessions. (C) Distribution of the*  
10 *number of genes with detected transcripts in the leaf of 107 wild-collected Swedish A. thaliana*  
11 *accessions (Dubin, Zhang et al. 2015) scored by RNA-sequencing (RPKM > 0). (D) Relationship*  
12 *between the ranks of the average transcript levels for all genes with detected transcripts in at least one*  
13 *accession and the number of accessions in (Dubin, Zhang et al. 2015) where the gene is expressed.*  
14 *Each dot in the plot represent one of the 25,382 genes with RPKM > 0 in at least one accession of*

1 (Dubin, Zhang et al. 2015).

2

3 ***RNA-seq bias likely explains part of the variability in detected transcripts of the***  
4 ***individual A. thaliana accessions for lowly expressed genes***

5 RNA-seq detects transcripts from nearly all genes in the genome in at least one of the  
6 accessions in *SCHMITZ-data*. In addition to a core set of genes with transcripts in all  
7 accessions, there is a large set of genes (on average 6,256 per accession) for which  
8 transcripts are detected only in some of the accessions. This suggests that there might  
9 be an extensive natural variation in the actual set of genes transcribed in the leaf of  
10 wild-collected *A. thaliana* accessions. An alternative explanation for this could be that  
11 RNA-seq is unable to reliably detect low levels of transcripts in the samples. Such  
12 RNA-seq introduced bias would result in a random detection of transcripts for  
13 individual accessions (i.e. produce a score = 0) for lowly expressed genes, and lead to  
14 a similar variability in the presence or absence of transcripts among the accessions as  
15 when there is a true accession-specific expression. To distinguish between these two  
16 alternative explanations for our observations, we first evaluated the relationship  
17 between the rank of the transcript-levels across the genes and the number of  
18 accessions in which transcripts were detected (Figure 2B). There was a clear overall  
19 trend in the data that transcripts were detected in fewer accessions for genes with  
20 lower overall transcript-levels. A similar trend was observed also in the *DUBIN-data*  
21 (Figure 2D). Based on this, we conclude that RNA-seq bias contributes to the  
22 observed variation in presence or absence of transcripts among the accessions.  
23 However, transcripts were missing in a significant fraction of the studied accessions  
24 also for many of the genes with high rank/overall transcript level. RNA-seq bias is an  
25 unlikely explanation in these cases, suggesting that at least part of the variability in  
26 the presence or absence of transcripts might be due to accession-specific expression.  
27 Thus, our overall results agree very well across the two datasets in that i) the number  
28 of genes expressed in the leaf of an individual plant is large, and ii) that the actual set  
29 of genes expressed varies between the individual accessions.

30

31 ***Genetics contributes to the variability in detected transcripts of the individual A.***  
32 ***thaliana accessions***

33 The observed variability in the RNA-seq scored presence or absence of transcripts for

1 individual genes between accessions could also be caused by experiment specific  
2 variations that occurred during e.g. plant growth or sample treatments. As transcript  
3 variability due to such uneven treatment of plants and samples are expected to be  
4 experiment-specific, they should not replicate across experiments. We therefore used  
5 the data from a second publicly available RNA-seq dataset from 107 wild-collected  
6 Swedish accessions with fully sequenced genomes and transcriptomes (*DUBIN-data*;  
7 (Dubin, Zhang et al. 2015)) to explore whether a similar pattern of accession-specific  
8 transcripts among genes with high transcript levels was also present there. In the  
9 *DUBIN-data*, the number of genes with detected transcripts were lower both when  
10 measured within any accession (23,478 with RPKM - Reads Per Kilobase per Million  
11 mapped reads - > 0), or within the individual accessions (16,136 to 20,109 with an  
12 average of 18,663; Figure 2C). The core set of genes expressed in all accessions  
13 contained 12,927 genes. The lower number of genes with transcripts is likely a result  
14 of the lower sequencing depth (~1/4 of the *SCHMITZ-data*) and the more stringent  
15 filtering of the reads. However, the overall trend in the results is the same with  
16 *SCHMITZ-data*: genes with lower transcript-levels had transcripts detected in fewer  
17 accessions, but transcripts for many genes with high overall transcript levels were also  
18 found only in a few accessions (Figure 2D). This overlap between the results from the  
19 two datasets suggests that the variation in which transcripts are highly expressed in  
20 the leaf of several but not all accessions is thus unlikely to be due to either  
21 experimental error or technical bias.

22

23 To explore whether there is a genetic basis for the presence or absence of transcripts  
24 for individual genes, we studied a set of 4,317 genes in the *SCHMITZ-data* in more  
25 detail. These genes were selected to i) have detected transcripts in more than 14  
26 (10%), but fewer than 126 (90%), of the accessions and ii) have transcript levels that  
27 were higher than the 99.99<sup>th</sup> percentile among the genes expressed in all accessions  
28 (Materials and Methods; Figure 2B). This subset was chosen to remove most of the  
29 genes influenced by the RNA-seq bias for lowly expressed genes (as discussed above).  
30 First, we created a covariance matrix for the proportion of transcript sharing among  
31 all pairs of accessions based on the average number of shared genes with detected  
32 transcripts (FPKM > 0). Then, we created a covariance matrix for the relationship  
33 between the accessions based on the genome-wide genotype as a genetic kinship

1 matrix weighted by allele frequencies based on all SNPs with  $MAF > 0.05$ . As  
2 illustrated in Figure 3, there is a highly significant correlation between the genetic and  
3 expression covariances for this set of genes ( $r = 0.035$ ,  $p = 1.0 \times 10^{-16}$ ; Figure 3).  
4 Although the correlation is low, it suggests that replicate plants from the same  
5 accession (i.e. that are genetically identical), on average share  $4,317 \times 0.035 = 151$   
6 transcripts more than they would with a genetically unrelated accession. This shows  
7 that there is a significant genetic contribution to the sharing of transcripts between  
8 accessions, suggesting that some genes are expressed in a genetically regulated,  
9 accession-specific manner.

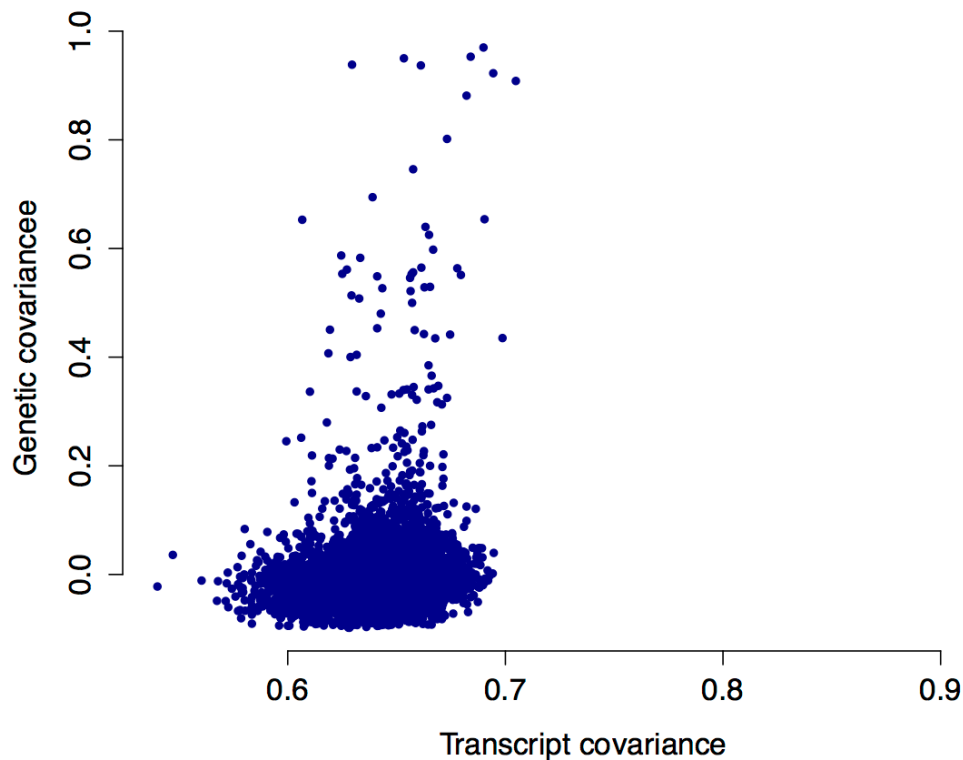

10

11

12 **Figure 3.** Correlation between the genetic and transcript covariances among 4,317 genes with  
13 transcripts detected in between 14 and 126 of the accessions in the SCHMITZ-data and that are  
14 expressed above a level where transcripts RNA-seq have been able to detect transcripts for a gene in  
15 all accessions. Each dot in the figure represents a pairwise relationship between two accessions, with  
16 the transcript covariance on the x-axis and the genetic covariance on the y-axis.

17

18 ***eQTL mapping detects cis-eQTL contributing to the presence of accession-specific***

1 ***transcripts in populations of wild-collected A. thaliana accessions***

2 Loss-of-function alleles are important contributors to natural trait-variation in *A.*  
3 *thaliana* (Michaels, He et al. 2003, Barboza, Effgen et al. 2013, Shen, De Jonge et al.  
4 2014, Forsberg, Andreatta et al. 2015). Further, earlier eQTL work in an *Arabidopsis*  
5 *thaliana* RIL-population has shown that cis-eQTL have a larger effect on expression  
6 than trans-eQTL (Keurentjes, Fu et al. 2007, West, Kim et al. 2007). To maximize  
7 eQTL-mapping power, we therefore screened the 4,317 genes that are most likely to  
8 have a genetically controlled accession-specific expression in the *SCHMITZ-data* (i.e.  
9 that are the least likely to be affected by RNA-seq bias as discussed above) for  
10 cis-eQTL alleles affecting the presence or absence of transcripts in particular  
11 accessions. A customized eQTL-mapping approach designed for this scenario was  
12 developed and used for this analysis (see Materials and Methods for details).

13

14 For each of the 4,317 genes, we first binarized (0/1) the phenotype to indicate  
15 presence (1; Normalized FPKM > 0) or absence (0; Normalized FPKM = 0) of  
16 transcripts for the assayed gene in each accession. Then, we performed an association  
17 analysis to all SNP markers in a 1 Mb region around the evaluated gene. For each  
18 SNP marker in this region, a logistic regression was fitted to the genotype of the  
19 marker with the binarized phenotype as response. Significant associations are  
20 interpreted as detection of a cis-eQTL contributing to the presence or absence of  
21 transcripts for the studied gene. In total, 349 such cis-eQTL were detected  
22 (FDR=12.3%). For 172 of the 349 genes, whose transcript-levels were affected by  
23 these cis-eQTL, transcripts were also detected in some, but not all, of the accessions  
24 of the *DUBIN-data* (Dubin, Zhang et al. 2015). By performing the same cis-eQTL  
25 analysis for the presence or absence of transcripts for these 172 genes, 81 of the  
26 cis-eQTL (FDR = 0.1) could be replicated (Table S2). Given that the collections of  
27 accessions in the *SCHMITZ-* and *DUBIN-data* were obtained from non-overlapping  
28 geographical locations, it is striking that so many of the cis-eQTL with the ability of  
29 almost shutting off the expression are present in, and could be replicated across, such  
30 diverse datasets.

31

32 ***Identification of functional candidate genes with cis-eQTL contributing to the***  
33 ***accession specific presence or absence of transcripts***

1 12 of the 349 genes affected by the cis-eQTL mapped in our study had earlier been  
2 subjected to functional studies in which the gene had a distinct phenotypic effect  
3 (Table 1). The cis-eQTL-mapping result for one of these genes (*AT2G21045*; High  
4 Arsenic Content 1; *HAC1*) is illustrated in Figure 4. *HAC1* has a skewed distribution  
5 of RNA-seq scored transcript levels (Figure 4A/4C) and a highly significant cis-eQTL  
6 signal in both the *SCHMITZ* and *DUBIN-data* (Figure 2B/2D ;  $p = 1.75 \times 10^{-10}$ /  $p =$   
7  $9.32 \times 10^{-11}$ ), respectively). Loss of *HAC1* expression is known to increase the  
8 amount of Arsenic in the leaf (Chao, Chen et al. 2014). Here, we detected a cis-eQTL  
9 for the expression of *HAC1* with the top SNP located within an exon of *HAC1* (Figure  
10 4B; top SNP Chromosome 2 at 9,028,685bp) in the *SCHMITZ-data*. This signal was  
11 replicated with a high significance also in the *DUBIN-data* (Figure 4D). This gene is  
12 thus a highly interesting functional candidate adaptive gene as i) it has earlier  
13 confirmed effects on Arsenic-levels in the plant, ii) there is a strong cis-eQTL  
14 regulating presence or absence of transcript for the gene segregating in wild-collected  
15 *A. thaliana* accessions, and iii) effect of the polymorphisms could be replicated at  
16 high significance in both analysed populations. Further experimental studies are,  
17 however, needed to functionally replicate the effect of the remaining 11  
18 polymorphisms on expression and the indicated phenotype as well as clarify whether  
19 such a link, together with the segregation in the natural *A. thaliana* population means  
20 that it has contributed to adaptation.

1 **Table 1. Genes with cis-eQTL detected in the population of 140 wild-collected *A. thaliana* accessions (*SCHMITZ-data*)**  
2 **contributing to the accession specific presence or absence of transcripts and earlier reported biological function.**

| <i>Locus</i> | <i>Gene</i> | <sup>a</sup> <i>SNP</i> | <sup>b</sup> <i>MAF</i> | <sup>c</sup> <i>Log odds ratio ± SE</i> | <sup>d</sup> <i>P-value</i> | <sup>e</sup> <i>Replicated</i> | <i>Reference</i>                        |
|--------------|-------------|-------------------------|-------------------------|-----------------------------------------|-----------------------------|--------------------------------|-----------------------------------------|
| AT2G21045    | HAC1        | chr2_9028685            | 0.14                    | 4.84 ± 0.76                             | 1.75e-10                    | Yes-GBF                        | (Chao, Chen et al. 2014)                |
| AT5G59340    | WOX2        | chr5_23935224           | 0.43                    | 2.82 ± 0.54                             | 1.83e-07                    | Yes                            | (Lie, Kelsom et al. 2012)               |
| AT1G77235    | MIR402      | chr1_29007464           | 0.46                    | 7.07 ± 1.02                             | 5.18e-12                    | No.e                           | (Kim, Kwak et al. 2010)                 |
| AT2G38220    | APD3        | chr2_16017043           | 0.29                    | 0.37 ± 0.07                             | 3.64e-07                    | No.e                           | (Luo, Gu et al. 2012)                   |
| AT1G13430    | ATST4C      | chr1_4601762            | 0.51                    | 0.36 ± 0.06                             | 3.87e-10                    | No                             | (Marsolais, Boyd et al. 2007)           |
| AT1G66600    | WRKY63      | chr1_24217798           | 0.06                    | 0.14 ± 0.02                             | 3.22e-10                    | No                             | (Van Aken, Zhang et al. 2013)           |
| AT2G19500    | ATCKX2      | chr2_8168512            | 0.07                    | 0.18 ± 0.03                             | 6.13e-09                    | No                             | (von Schwartzenberg, Núñez et al. 2007) |
| AT3G27620    | AOX1C       | chr3_10230473           | 0.39                    | 0.4 ± 0.07                              | 6.45e-08                    | No                             | (Wang, Huang et al. 2012)               |
| AT3G57270    | BG1         | chr3_22031771           | 0.06                    | 0.15 ± 0.02                             | 1.09e-09                    | No                             | (Zavaliev, Levy et al. 2013)            |
| AT4G01420    | CBL5        | chr4_583422             | 0.12                    | 0.2 ± 0.03                              | 7.48e-12                    | No                             | (Cheong, Sung et al. 2010)              |
| AT4G02850    | DAAR1       | chr4_597373             | 0.06                    | 0.15 ± 0.02                             | 1.41e-09                    | No                             | (Strauch, Svedin et al. 2015)           |
| AT4G29340    | PRF4        | chr4_14639984           | 0.21                    | 0.36 ± 0.07                             | 2.32e-07                    | No                             | (Deeks, Cvrcková et al. 2005)           |

3 <sup>a</sup>SNP: Top SNP in association analysis; <sup>b</sup>MAF: Minor allele frequency of the top associated SNP in the *SCHMITZ-data*; <sup>c</sup>Log odds ratio of the top associated SNP ± Standard Error; <sup>d</sup>P-value: Nominal p-value for the  
4 top associated SNP; <sup>e</sup>Replicated: Could the original association in the *SCHMITZ-data* be replicated in the *DUBIN-data*, Yes-GBF: Replicated at Genome Wide Bonferroni threshold, Yes, replicated at Bonferroni

1

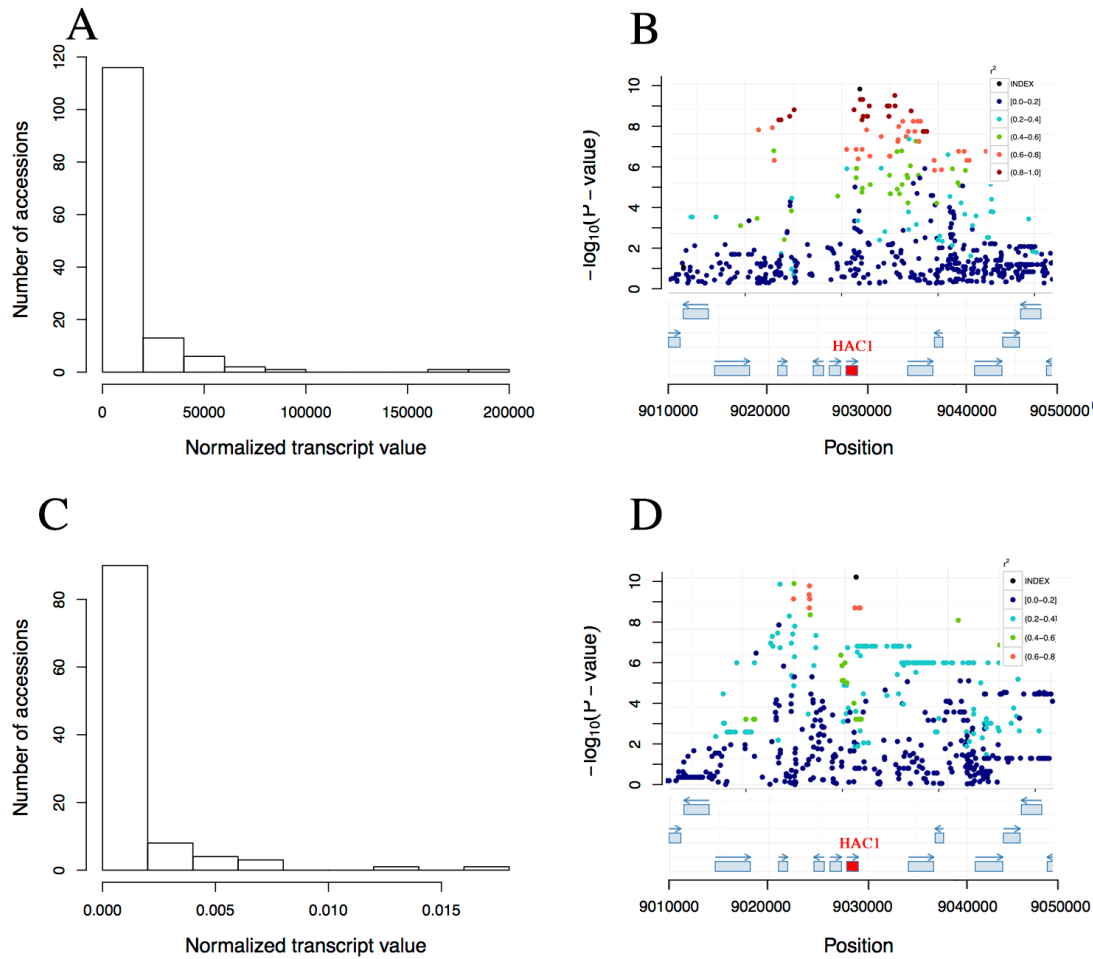

2

3 **Figure 4.** The eQTL analysis detects a highly significant, replicable association for the expression of  
 4 the gene HAC1 (AT2G21045). The peak SNP is located in an exon of HAC1. (A/C) Distributions of  
 5 transcript-levels for the 140/107 accessions (FPKM/RPKM-values from RNA-sequencing) in the  
 6 SCHMITZ-data (A) and DUBIN-data (C) (Schmitz, Schultz et al. 2013, Dubin, Zhang et al. 2015),  
 7 respectively. (B/D) Illustrations of the association-profiles (Kierczak, Jabłońska et al. 2015) for  
 8 expression of the gene AT2G21045 (HAC1) in the SCHMITZ-data (B) and the DUBIN-data (D)  
 9 ((Schmitz, Schultz et al. 2013)/(Dubin, Zhang et al. 2015)), respectively. There is a highly significant  
 10 cis-eQTL to a SNP located in an exon of HAC1.

11

### 12 Mapping of eQTL for genes with transcripts in most accessions

13 The majority of the genes in the SCHMITZ-data (20,610) (Schmitz, Schultz et al.  
 14 2013) were expressed in more than 90% of the accessions. The transcript-levels  
 15 (Normalized FPKM) for these genes were quantile-transformed and used as  
 16 phenotypes in linear mixed model based, kinship corrected genome-wide eQTL scans.



1 In total, these analyses revealed 2,320 eQTL (FDR = 0.09), with 1,844 (79.5%) of the  
2 associations in cis (within a  $\pm 1$  Mb window around the mapped gene). 476 (20.5%)  
3 eQTL affected the expression of 2,240 genes in trans (Table S4). All eQTL were  
4 significant after correction for genome-wide analyses across multiple expression traits.  
5 Out of the 2,320 genes with eQTL in the *SCHMITZ-data*, 2,006 had transcripts in all  
6 accessions of the *DUBIN-data* (Dubin, Zhang et al. 2015), and 649 of the eQTL  
7 affecting 636 genes could be replicated at a 0.01 Bonferroni threshold correcting for  
8 the number of tested markers in the replication region (FDR=0.031; Table S5).  
9 Among the 2,240 genes with eQTL in the *SCHMITZ-data*, 175 have earlier been  
10 shown to have an altered phenotype from loss-of-function alleles (Lloyd and Meinke  
11 2012) and 38 of these were among those replicated in the *DUBIN-data*. As many of  
12 these genes have strong effects on potentially adaptive traits, including development,  
13 hormone pathways and stress responses, they are plausible functional candidate  
14 adaptive genes in *A. thaliana*. These genes are listed in Table S6.

15

## 16 Discussion

17 *Arabidopsis thaliana* is a small flowering plant that has colonized a wide range of  
18 habitats and while adapting to these it has evolved a remarkable genotypic and  
19 phenotypic variation in the world-wide population (Atwell, Huang et al. 2010, Cao,  
20 Schneeberger et al. 2011). Genetic regulation of gene expression is known to be an  
21 important mechanism underlying adaptation (Wang, Stec et al. 1999, Kliebenstein,  
22 Pedersen et al. 2002, Carneiro, Piorno et al. 2015) and much work has been done to  
23 elucidate the role of gene expression in the regulation of complex traits in *A. thaliana*.  
24 Most studies have, however, been performed in a limited number of genetic  
25 backgrounds, mostly *Col-0* (Schmid, Davison et al. 2005), or a limited number of  
26 natural accessions (Delker and Quint 2011, Gan, Stegle et al. 2011, Richards, Rosas et  
27 al. 2012). This earlier work has provided valuable insights to the general  
28 characteristics of expression variation in *A. thaliana* in the leaf of natural populations.  
29 To better understand how the available knowledge can be utilized to better understand  
30 the role of genetically regulated transcriptional variation in, for example, different  
31 tissues, developmental stages or as a response to various biotic and abiotic stresses, it  
32 is however necessary to perform more extensive studies including a much broader  
33 selection of genotypes that are more representative for those present in the wild.

1

2 Here, we report results that provide a deeper insight into the transcript variation in  
3 leaf of two large sets of wild-collected accessions from the global *A. thaliana*  
4 population. We also explore how this transcript variation correlates with the genome  
5 divergence between the accessions. Our results provide a deeper understanding about  
6 how genetic variants that segregate in the natural *A. thaliana* population contribute to  
7 the variation in leaf transcript-levels across the accessions. This information is  
8 important as such genetically controlled differences in expression-levels by alleles  
9 that segregate in the wild might result from selection acting on different regulatory  
10 variants of genes important for the adaptation of *A. thaliana* to diverse living  
11 conditions. Our results contain several such functional candidate adaptive genes and  
12 this study thus report interesting candidate genes for further experimental validation  
13 and identification of the underlying ELPs.

14

15 In this study, the average proportion of genes with detected transcripts in the leaf  
16 within the individual accessions is slightly higher than that reported in earlier studies  
17 based on smaller numbers of accessions (73 here vs 64% in (Richards, Rosas et al.  
18 2012)). The estimate in Gan *et al.* (Gan, Stegle et al. 2011) is slightly higher for  
19 protein-coding genes, but lower if all genes are considered. We also detect a large  
20 core-set of genes (61% of all with scored transcripts) with transcripts in nearly all  
21 (>90%) of the accessions. The genes in this set overlapped to a great extent between  
22 the two diverse sets of wild-collected *A. thaliana* accessions, suggesting that these  
23 include the set of basal, as well as leaf-specific, expressed genes.

24

25 When scoring expression-levels from deep-coverage RNA-seq across a large  
26 collection of accessions, transcripts were detected in the leaf from nearly all genes in  
27 the genome in at least one of accessions. Further, a large number of apparently  
28 accession-specific transcripts were also detected due to high sensitivity of the  
29 RNA-seq approach. The majority of the accession-specific transcripts are, however,  
30 found at low levels in only a few accessions, making it difficult to conclude whether  
31 the observation is due to the underlying biology or a result of bias in the RNA-seq  
32 analysis. Transcripts from a relatively large number of genes were, however, found to  
33 be present in high levels in some accessions, while being absent in others, suggesting

1 that these genes might be expressed in an accession-specific manner. Further, we also  
2 revealed a highly significant correlation between the transcript- and genetic  
3 covariances amongst the accessions, suggesting that at least part of this transcript  
4 variation was under genetic control.

5

6 Here, we have focused on mapping cis-eQTL affecting the presence or absence of  
7 transcripts motivated by earlier findings that illustrated the adaptive value of strong  
8 loss-of-function alleles in *A. thaliana* (Barboza, Effgen et al. 2013, Shen, De Jonge et  
9 al. 2014, Forsberg, Andreatta et al. 2015). Given that phenotypes of many mutant  
10 alleles are already described in the literature, our aim was to identify new functional  
11 candidate adaptive genes by screening for cis-eQTL where alleles contributing to the  
12 presence or absence of transcripts for the studied genes segregated in populations of  
13 wild-collected *A. thaliana* accessions. If these cis-eQTL affect a gene with a known  
14 phenotype, it can then be considered as a strong candidate adaptive gene. Among our  
15 results, we find a particularly interesting example of where our approach is able to  
16 detect adaptive genes that have been studied in detail. *HAC1* (Chao, Chen et al. 2014)  
17 was detected by our approach in the larger collection (Schmitz, Schultz et al. 2013)  
18 and replicated in the smaller (Dubin, Zhang et al. 2015), and its role in the reduction  
19 of Arsenik (*HAC1*) has earlier been described in the literature. We find this to be a  
20 useful proof-of-principle finding which suggests that at least some of the highlighted  
21 functional candidate adaptive genes will also be found important for adaption in  
22 future studies.

23

24 We found that cis-eQTL made significant contribution to the accession-specific  
25 expression for 349 genes. Transcripts were lacking for 111 of these genes in *Col-0*,  
26 which illustrates the added value of utilizing a broader set of accessions when  
27 studying the variability in gene-expression in *A. thaliana*. One of the genes for which  
28 no transcripts were found in *Col-0* is *MUM2*. This is a gene for which a structural  
29 variation affecting insect resistance is segregating in the world-wide *A. thaliana*  
30 population (Kroymann, Donnerhacke et al. 2003). Our results thus support the  
31 conclusion of Gan *et al.* (Gan, Stegle et al. 2011) that studies of natural *A. thaliana*  
32 accessions can provide novel insights that are difficult to obtain in studies focusing  
33 entirely on the reference accession *Col-0*.

1

2 When there is a leap in technology, it is important to adapt the existing analytical  
3 methods to better utilize the additional information obtained about the underlying  
4 biology. Here, we illustrate the added value in utilizing the ability of RNA-seq to  
5 score a broader range of expression values than microarray technology. In particular,  
6 we make use of the information about expression-traits where the transcript  
7 distributions for the assayed genes are heavily zero-inflated (i.e. contain many  
8 accessions with no detectable transcripts). We show that these distributions, in many  
9 cases, are influenced by cis-eQTL with strong effects on the transcript levels. These  
10 distributions are too skewed to be appropriately transformed or modelled using other  
11 distributions such as a negative binomial (Sun 2012). Earlier eQTL-mapping studies  
12 based on RNA-seq data have therefore either removed genes whose transcript levels  
13 were zero-inflated (Brown, Buil et al. 2014), utilized non parametric testing to avoid  
14 the assumption of normality (Montgomery, Sammeth et al. 2010) or utilized  
15 regression without first addressing the potential issues arising from the non-normality  
16 of the transcript-levels (Pickrell, Marioni et al. 2010). Our approach to, based on the  
17 observed distribution properties, propose and test for a particular type of genetic  
18 effects causing accession-specific expression, we could reveal many new cis-eQTL.  
19 Many of these associations replicated in an independent dataset and several genes  
20 were promising functional candidate adaptive genes. Although the proposed  
21 cis-eQTL-mapping approach is not a general framework for mapping all eQTL, it  
22 illustrates the value of developing and utilizing analysis methods for genome and  
23 transcriptome data to test well-defined biological hypotheses.

24

25 In summary, we show that the set of genes with detected transcripts in the leaf of  
26 wild-collected *Arabidopsis thaliana* accessions contain a large core-set of genes with  
27 transcripts in all accessions. Furthermore, many genes are expressed in an  
28 accession-specific manner that in part can be explained by genetics. The heritable  
29 variation in the presence or absence of transcripts was in many cases affected by  
30 cis-eQTL, several of which were found to be functional candidate adaptive genes. The  
31 quantitative variation in transcript levels for many broadly expressed genes was also  
32 found to be under genetic control by cis- and trans-eQTL.

33

## 1 **Materials and methods**

### 2 ***Whole genome SNP and RNA-seq data for a population of 144 wild-collected A. thaliana*** 3 ***accessions***

4 In an earlier study, Schmitz *et al.* (Schmitz, Schultz et al. 2013) RNA-sequenced a  
5 collection of 144 natural *Arabidopsis thaliana* accessions. We downloaded this data  
6 together with their corresponding whole-genome SNP genotypes made available as  
7 part of the 1001 Genomes project (Cao, Schneeberger et al. 2011). According to the  
8 author's description and the original publication (Schmitz, Schultz et al. 2013) , the  
9 plants were grown in 22°C and leaves had been collected from rosettes prior to  
10 flowering. Further, RNA reads had been aligned to SNP-substituted reference  
11 genomes for each accession using Bioscope version 1.3 with default parameters.  
12 Cufflinks version 1.1 had been used to quantify Transcript levels using the following  
13 parameters: '-F' 0; '-b'; '-N'; '-library-type' fr-secondstrand; '-G' TAIR10.gtf. Raw  
14 FPKM values were quantile normalized by the 75th percentile and multiplied by  
15 1,000,000 to be transformed to a comfortable scale. We removed two accessions from  
16 the data (Alst\_1 and Ws\_2) due to missing genotype data and two accessions (Ann\_1  
17 and Got\_7) due to their low transcript Call Rate (16,861 and 18,693 genes with  
18 transcripts as compared to the range of 22,574 to 26,967 for the other the accessions).  
19 The final dataset used for eQTL mapping (*SCHMITZ-data*) included 1,347,036 SNPs  
20 with MAF above 0.05, a call-rate above 0.95 and RNA-seq derived FPKM-values for  
21 33,554 genes.

22

### 23 ***Whole genome SNP and RNA-seq data for a population of 107 Swedish wild-collected A.*** 24 ***thaliana accessions***

25 We downloaded a second public dataset of 107 Swedish *A. thaliana* lines with fully  
26 sequenced genomes and transcriptomes (Dubin, Zhang et al. 2015) from plants grown  
27 in 10°C and 16°C. Here, RNA had been prepared from whole rosettes collected at the  
28 9-true-leaf stage. RNA reads had been aligned using PALMapper aligner using a  
29 variant-aware alignment strategy. Reads that were longer than 24 bp and uniquely  
30 mapped into the exonic regions had been used to quantify expression. Further details  
31 about reads filtering and transcripts quantification can be found in (Dubin, Zhang et al.  
32 2015). We used the same quality control procedures for this dataset as for the larger  
33 dataset described above. We compared the data from the experiments done at 10°C

1 and 16°C and found that they were quantitatively similar and therefore only used the  
2 data generated at 10°C (*DUBIN*-data) for further analysis. In total, this data contained  
3 1,785,214 SNPs with MAF above 0.05, a call-rate above 0.95, and RNA-seq derived  
4 RPKM-values for 33,322 genes.

5

## 6 **Statistical analysis**

### 7 *Cis-eQTL mapping to detect polymorphisms contributing to the accession specific presence* 8 *of gene-transcripts*

9 First, we selected the 4,317 genes in the *SCHMITZ*-data that i) had transcripts in more  
10 than 14 (10%), but fewer than 126 (90%), of the accessions and ii) had  
11 transcript-levels higher than the 99.99<sup>th</sup> percentile for the genes with transcripts in all  
12 accessions. Then, we binarized the transcript-level phenotype by assigning values  
13 zero or one for each accession depending on whether transcripts for the gene were  
14 present (Normalized FPKM > 0) or not (Normalized FPKM < 0). Then, a logistic  
15 regression approach was used to perform an analysis across the SNP markers in a  
16 ±1Mb region around each of the tested genes using the *qtsore* (*family = binomial*)  
17 function in GenABEL (Aulchenko, Ripke et al. 2007).

18

19 For significance testing, we first applied a Bonferroni corrected significance threshold  
20 correcting for the number of SNPs tested in the ±1Mb region around the gene. Second,  
21 we accounted for the potential noise in the transcript measurements by applying a  
22 second filtering based on a permutation test performed as follows. Under the  
23 assumption that all the 0 values (lack of transcripts) resulted from non-biological  
24 noise, the binarized phenotypes were randomly shuffled with respect to the cis-SNP  
25 genotypes 1,000 times and an association scan performed in each of these datasets as  
26 described above. In each scan, the minimum p-value was saved to provide an  
27 empirical null-distribution for every trait. Trait-specific significance-thresholds were  
28 obtained by taking the 1% cut off from these distributions. To account for multiple  
29 testing across all tested traits (genes), the FDR was calculated as the expected number  
30 of significant traits with eQTL at the given significance-threshold divided by the  
31 number of traits where significant eQTL were detected.

32

### 33 *Mapping of eQTLs for genes with transcripts in most accessions*

1 For the 20,610 genes in the *SCHMITZ-data* where transcripts were detected in more  
2 than 90% of the accessions, a standard eQTL mapping approach was used by  
3 performing a GWA analysis fitting inverse-Gaussian transformed expression values  
4 to the genome-wide SNP genotypes in a linear mixed model (1) using the *polygenic*  
5 and *mmscore* functions in GenABEL package (Aulchenko, Ripke et al. 2007).

6

$$7 \quad Y = X\beta + Zu + e \quad (1)$$

8

9  $Y$  is here the transformed expression phenotype, which is normally distributed with  
10 mean 0.  $X$  is the design matrix with one column containing the allele-count of the  
11 tested SNP (0,1,2 for minor-allele homozygous, heterozygous and major-allele  
12 homozygous genotypes, respectively).  $\beta$  is a vector of the additive allele-substitution  
13 effect for the SNP.  $Z$  is the design matrix obtained from a Cholesky decomposition of  
14 the kinship matrix  $G$  estimated from the whole-genome, MAF-filtered SNP data with  
15 the *ibs* function (option `weight = 'freq'`) in the GenABEL package (Aulchenko, Ripke  
16 et al. 2007). The  $Z$  matrix satisfies  $ZZ' = G$ , and thus, the random effect vector  $u$  is  
17 normally distributed,  $u \sim N(0, I\sigma_g^2)$ .  $e$  is the normally distributed residual variance  
18 with  $e \sim N(0, I\sigma_e^2)$ . The GWA results were visualized using the *cgmisc* R-package  
19 (Kierczak, Jabłońska et al. 2015).

20

21 A permutation test was used to set the significance threshold in the analysis (Smith  
22 and Kruglyak 2008, Nelson, Pettersson et al. 2013). As the number of traits was too  
23 large to derive a trait-specific threshold, a GWA-scan was performed across all traits  
24 to identify those with at least one SNP with  $p < 1 \times 10^{-6}$ . Among the genes that passed  
25 this threshold, a random set of 200 traits was selected. For each of these traits, GWA  
26 were performed in two hundred permuted datasets where GRAMMAR+ transformed  
27 residuals (Belonogova, Svishcheva et al. 2013, Forsberg, Andreatta et al. 2015) were  
28 used as phenotype, resulting in 40,000 permutations in total. Based on this total  
29 distribution, we derived a 1% significance threshold ( $-\log_{10}(p\text{-value}) = 6.84$ ).

30

### 31 ***Replication of detected eQTLs***

32 As 26/38% the SNPs in the *SCHMITZ-data* were missing from the *DUBIN-data*  
33 (before/after filtering for MAF), we replicated our findings by testing for associations



1 to SNPs in the *DUBIN*-data that were physically close to the detected top SNP in the  
2 *SCHMITZ*-data. The average expected LD-block size in Arabidopsis is about 10 kb  
3 (Kim, Plagnol et al. 2007), and therefore we performed the replication analysis to  
4 SNPs located in a  $\pm 10$  kb region around the eQTL peaks in the *SCHMITZ*-data and  
5 associate their genotypes to the transcript level of the corresponding genes in the  
6 *DUBIN*-data. We considered a cis-eQTL replicated if i) the significance for any of the  
7 SNPs tested in this region passed a significance threshold corrected for the number of  
8 tested SNPs in this region using Bonferroni correction, and ii) the overlapping SNPs  
9 show effects in the same direction. FDR was calculated for the results across the trait  
10 as the expected number of false positives ( $0.05 * \text{the number of tested regions}$ )  
11 divided by the number of regions with significant eQTL.

12

### 13 ***Definition of cis and trans eQTL peaks***

14 For each gene with a significant GWA, the SNP with the lowest P-value was selected  
15 as the peak location for the eQTL. When the leading SNPs had been defined for each  
16 trait, SNPs were considered to represent the same eQTL if they were located within 1  
17 Mb of each other in the TAIR10 reference genome. eQTL peaks located within 1Mb  
18 up- or downstream of the genes whose expression was used as phenotype were  
19 classified as cis-eQTL, while the remaining eQTL peaks were classified as  
20 trans-eQTL.

21

### 22 **Supplementary Material**

23 Table S1. 27 genes for which transcripts were only detected in the collection of 107  
24 Swedish *A. thaliana* accessions.

25

26 Table S2. 349 cis-eQTL detected in the population of 140 wild-collected *A. thaliana*  
27 accessions.

28

29 Table S3. 81 cis-eQTL detected in the population of 140 wild-collected *A. thaliana*  
30 accessions that were replicated in the population of 107 wild-collected Swedish *A.*  
31 *thaliana* accessions.

32

33 Table S4. 2,320 eQTL regulating the expression of 2,240 genes expressed in most of



1 the 140 wild-collected *A. thaliana* accessions

2

3 Table S5. 175 genes affected by eQTL in the population of 140 wild-collected *A.*  
4 *thaliana* accessions for which strong phenotypic effect have already been described in  
5 Lloyd et al. (Lloyd and Meinke 2012).

6

7 Table S6. 649 cis-eQTL detected in the population of 140 wild-collected *A. thaliana*  
8 accessions that were replicated in the population of 107 wild-collected Swedish *A.*  
9 *thaliana* accessions.

10

11 Figure S1: Illustration of the geographical locations for the 140 wild-collected  
12 *Arabidopsis thaliana* accessions utilized in the eQTL analyses.

13

#### 14 **Acknowledgements**

15 We thank Lars Hennig for valuable discussions about the results obtained during this  
16 project.

17

#### 18 **References**

19 Atwell, S., et al. (2010). "Genome-wide association study of 107 phenotypes in  
20 *Arabidopsis thaliana* inbred lines." Nature **465**(7298): 627-631.

21

22 Aulchenko, Y. S., et al. (2007). "GenABEL: an R library for genome-wide  
23 association analysis." Bioinformatics **23**(10): 1294-1296.

24

25 Barboza, L., et al. (2013). "Arabidopsis semidwarfs evolved from independent  
26 mutations in GA20ox1, ortholog to green revolution dwarf alleles in rice and  
27 barley." Proceedings of the National Academy of Sciences **110**(39):  
28 15818-15823.

29

1 Belonogova, N. M., et al. (2013). "Region-based association analysis of human  
2 quantitative traits in related individuals."

3

4 Brem, R. B., et al. (2002). "Genetic dissection of transcriptional regulation in  
5 budding yeast." Science **296**(5568): 752-755.

6

7 Brown, A. A., et al. (2014). "Genetic interactions affecting human gene expression  
8 identified by variance association mapping." Elife **3**: e01381.

9

10 Cao, J., et al. (2011). "Whole-genome sequencing of multiple *Arabidopsis thaliana*  
11 populations." Nature genetics **43**(10): 956-963.

12

13 Carneiro, M., et al. (2015). "Candidate genes underlying heritable differences in  
14 reproductive seasonality between wild and domestic rabbits." Animal genetics.

15

16 Carroll, S. B. (2000). "Endless forms: the evolution of gene regulation and  
17 morphological diversity." Cell **101**(6): 577-580.

18

19 Chao, D.-Y., et al. (2014). "Genome-wide association mapping identifies a new  
20 arsenate reductase enzyme critical for limiting arsenic accumulation in plants."  
21 PLoS biology **12**(12): e1002009.

22

1 Delker, C. and M. Quint (2011). "Expression level polymorphisms: heritable traits  
2 shaping natural variation." Trends in plant science **16**(9): 481-488.

3

4 Dubin, M. J., et al. (2015). "DNA methylation in Arabidopsis has a genetic basis  
5 and shows evidence of local adaptation." Elife **4**: e05255.

6

7 Forsberg, S. K., et al. (2015). "The Multi-allelic Genetic Architecture of a  
8 Variance-heterogeneity Locus for Molybdenum Accumulation Acts as a Source of  
9 Unexplained Additive Genetic Variance." bioRxiv: 019323.

10

11 Gan, X., et al. (2011). "Multiple reference genomes and transcriptomes for  
12 Arabidopsis thaliana." Nature **477**(7365): 419-423.

13

14 Keurentjes, J. J., et al. (2007). "Regulatory network construction in Arabidopsis  
15 by using genome-wide gene expression quantitative trait loci." Proceedings of  
16 the National Academy of Sciences **104**(5): 1708-1713.

17

18 Kierczak, M., et al. (2015). "cgmisc: enhanced genome-wide association analyses  
19 and visualization." Bioinformatics: btv426.

20

21 Kim, S., et al. (2007). "Recombination and linkage disequilibrium in Arabidopsis  
22 thaliana." Nature genetics **39**(9): 1151-1155.

23

- 1 Kliebenstein, D., et al. (2002). "Comparative analysis of insect resistance QTL and  
2 QTL controlling the myrosinase/glucosinolate system in *Arabidopsis thaliana*."  
3 Genetics **161**(1): 325-332.
- 4
- 5 Kothapalli, R., et al. (2002). "Microarray results: how accurate are they?" BMC  
6 bioinformatics **3**(1): 22.
- 7
- 8 Kroymann, J., et al. (2003). "Evolutionary dynamics of an *Arabidopsis* insect  
9 resistance quantitative trait locus." Proceedings of the National Academy of  
10 Sciences **100**(suppl 2): 14587-14592.
- 11
- 12 Li, L., et al. (2013). "Mendelian and non-Mendelian regulation of gene expression  
13 in maize." PLoS Genet **9**(1): e1003202.
- 14
- 15 Li, Y., et al. (2006). "Mapping determinants of gene expression plasticity by  
16 genetical genomics in *C. elegans*."
- 17
- 18 Lloyd, J. and D. Meinke (2012). "A comprehensive dataset of genes with a  
19 loss-of-function mutant phenotype in *Arabidopsis*." Plant Physiology **158**(3):  
20 1115-1129.
- 21
- 22 Michaels, S. D., et al. (2003). "Attenuation of FLOWERING LOCUS C activity as a  
23 mechanism for the evolution of summer-annual flowering behavior in  
24 *Arabidopsis*." Proceedings of the National Academy of Sciences **100**(17):  
25 10102-10107.

1

2 Montgomery, S. B., et al. (2010). "Transcriptome genetics using second  
3 generation sequencing in a Caucasian population." Nature **464**(7289): 773-777.

4

5 Morley, M., et al. (2004). "Genetic analysis of genome-wide variation in human  
6 gene expression." Nature **430**(7001): 743-747.

7

8 Nasrallah, M., et al. (2004). "Natural variation in expression of  
9 self-incompatibility in *Arabidopsis thaliana*: implications for the evolution of  
10 selfing." Proceedings of the National Academy of Sciences of the United States of  
11 America **101**(45): 16070-16074.

12

13 Nelson, R. M., et al. (2013). "Variance Heterogeneity in *Saccharomyces cerevisiae*  
14 Expression Data: Trans-Regulation and Epistasis." PloS one **8**(11): e79507.

15

16 Petretto, E., et al. (2006). "Heritability and tissue specificity of expression  
17 quantitative trait loci."

18

19 Pickrell, J. K., et al. (2010). "Understanding mechanisms underlying human gene  
20 expression variation with RNA sequencing." Nature **464**(7289): 768-772.

21

22 Richards, C. L., et al. (2012). "Genome-wide patterns of *Arabidopsis* gene  
23 expression in nature." PLoS Genet **8**(4): e1002662.

1

2 Roberts, A., et al. (2011). "Improving RNA-Seq expression estimates by  
3 correcting for fragment bias." Genome Biol **12**(3): R22.

4

5 Saez-Aguayo, S., et al. (2014). "Local evolution of seed flotation in Arabidopsis."  
6 PLoS Genet **10**(3): e1004221.

7

8 Schadt, E. E., et al. (2003). "Genetics of gene expression surveyed in maize, mouse  
9 and man." Nature **422**(6929): 297-302.

10

11 Schmid, M., et al. (2005). "A gene expression map of Arabidopsis thaliana  
12 development." Nature genetics **37**(5): 501-506.

13

14 Schmitz, R. J., et al. (2013). "Patterns of population epigenomic diversity." Nature.

15

16 Schmitz, R. J., et al. (2013). "Patterns of population epigenomic diversity." Nature  
17 **495**(7440): 193-198.

18

19 Schwartz, C., et al. (2009). "Cis-regulatory changes at FLOWERING LOCUS T  
20 mediate natural variation in flowering responses of Arabidopsis thaliana."  
21 Genetics **183**(2): 723-732.

22

1 Schwartz, S., et al. (2011). "Detection and removal of biases in the analysis of  
2 next-generation sequencing reads." PloS one **6**(1): e16685.

3

4 Shen, X., et al. (2014). "Natural CMT2 variation is associated with genome-wide  
5 methylation changes and temperature seasonality." PLoS genetics **10**(12):  
6 e1004842.

7

8 Smith, E. N. and L. Kruglyak (2008). "Gene-environment interaction in yeast gene  
9 expression." PLoS Biol **6**(4): e83.

10

11 Sun, W. (2012). "A statistical framework for eQTL mapping using RNA - seq  
12 data." Biometrics **68**(1): 1-11.

13

14 Tung, J., et al. (2015). "The genetic architecture of gene expression levels in wild  
15 baboons." Elife **4**: e04729.

16

17 Wang, R.-L., et al. (1999). "The limits of selection during maize domestication."  
18 Nature **398**(6724): 236-239.

19

20 Wang, Z., et al. (2009). "RNA-Seq: a revolutionary tool for transcriptomics."  
21 Nature Reviews Genetics **10**(1): 57-63.

22

1 Wentzell, A. M., et al. (2007). "Linking metabolic QTLs with network and  
2 cis-eQTLs controlling biosynthetic pathways." PLoS Genet **3**(9): 1687-1701.

3

4 West, M. A., et al. (2007). "Global eQTL mapping reveals the complex genetic  
5 architecture of transcript-level variation in Arabidopsis." Genetics **175**(3):  
6 1441-1450.

7

8 Zhang, X., et al. (2011). "Genetic architecture of regulatory variation in  
9 Arabidopsis thaliana." Genome research **21**(5): 725-733.

10

11

12



**Table S1. 27 genes for which transcripts were only detected in the collection of 107 Swedish *A. thaliana* accessions.**

| <i>Locus</i> | <i>Annotation</i> |
|--------------|-------------------|
| AT1G11640    | tRNA-Trp          |
| AT1G20210    | tRNA-Asp          |
| AT1G22651    | Unknown           |
| AT1G28740    | tRNA-Pro          |
| AT1G28750    | tRNA-Pro          |
| AT1G28790    | tRNA-Pro          |
| AT1G28810    | tRNA-Pro          |
| AT1G28830    | tRNA-Pro          |
| AT1G28840    | tRNA-Pro          |
| AT1G28910    | tRNA-Pro          |
| AT1G28990    | tRNA-Pro          |
| AT1G57710    | tRNA-Undet        |
| AT1G80831    | Unknown           |
| AT2G01667    | Unknown           |
| AT2G16016    | Unknown           |
| AT2G16881    | Unknown           |
| AT2G34202    | MIR399D           |
| AT2G40802    | Unknown           |
| AT3G04732    | Unknown           |
| AT3G06335    | tRNA-Pro          |
| AT3G29195    | Unknown           |
| AT3G29633    | Unknown           |
| AT3G49051    | Unknown           |
| AT3G50651    | Unknown           |
| AT5G41774    | Unknown           |
| AT5G65445    | tRNA-Ser          |
| AT5G66211    | Unknown           |

**Table S2, 349 cis-eQTL detected in the population of 140 wild-collected *A. thaliana* accessions**

| <i>Locus</i> | <i>Peak SNP</i> | <i><sup>a</sup>MAF</i> | <i><sup>b</sup>Log odds ratio±SE</i> | <i><sup>c</sup>P-value</i> | <i><sup>d</sup>Replicated</i> | <i>Annotation</i>                                                                                         |
|--------------|-----------------|------------------------|--------------------------------------|----------------------------|-------------------------------|-----------------------------------------------------------------------------------------------------------|
| AT2G05117    | chr2_1830148    | 0,36                   | 0,21±0,02                            | 1,59E-20                   | Yes-GBF                       | SCR-like-9                                                                                                |
| AT4G22390    | chr4_11828893   | 0,25                   | 0,21±0,02                            | 1,32E-18                   | Yes-GBF                       | F-box-associated-ubiquitination-effector-family-protein                                                   |
| AT5G08460    | chr5_2734328    | 0,51                   | 20±2,28                              | 2,04E-18                   | Yes-GBF                       | GDSL-like-Lipase/Acylhydrolase-superfamily-protein                                                        |
| AT1G34100    | chr1_12399605   | 0,48                   | 19,39±2,32                           | 6,09E-17                   | Yes-GBF                       | unknow function                                                                                           |
| AT1G05780    | chr1_1727506    | 0,19                   | 0,2±0,03                             | 3,27E-15                   | Yes-GBF                       | Vacuolar-ATPase-assembly-integral-membrane-protein-VMA21-like-domain                                      |
| AT2G04830    | chr2_1694433    | 0,11                   | 6,17±0,82                            | 4,00E-14                   | Yes-GBF                       | Protein-of-unknown-function-(DUF295)                                                                      |
| AT1G64235    | chr1_23835317   | 0,1                    | 6,83±0,9                             | 4,28E-14                   | Yes-GBF                       | Bifunctional-inhibitor/lipid-transfer-protein/seed-storage-2S-albumin-superfamily-protein                 |
| AT2G15930    | chr2_6938326    | 0,22                   | 4,11±0,56                            | 2,75E-13                   | Yes-GBF                       | unknow function                                                                                           |
| AT1G33930    | chr1_12308998   | 0,3                    | 0,28±0,04                            | 4,41E-13                   | Yes-GBF                       | P-loop-containing-nucleoside-triphosphate-hydrolases-superfamily-protein                                  |
| AT3G25720    | chr3_9381875    | 0,39                   | 3,27±0,46                            | 1,06E-12                   | Yes-GBF                       | RNA-directed-DNA-polymerase-(reverse-transcriptase)-related-family-protein                                |
| AT1G11370    | chr1_3824839    | 0,26                   | 4,3±0,61                             | 1,25E-12                   | Yes-GBF                       | Pectin-lyase-like-superfamily-protein                                                                     |
| AT1G67148    | chr1_25121971   | 0,2                    | 0,26±0,04                            | 3,53E-12                   | Yes-GBF                       | unknow function                                                                                           |
| AT4G15053    | chr4_8578153    | 0,07                   | 7,03±1,02                            | 5,47E-12                   | Yes-GBF                       | Protein-of-Unknown-Function-(DUF239)                                                                      |
| AT4G01190    | chr4_506690     | 0,54                   | 42,47±6,2                            | 7,44E-12                   | Yes-GBF                       | phosphatidylinositol-phosphate-kinase-10                                                                  |
| AT1G76830    | chr1_28791638   | 0,07                   | 7,05±1,05                            | 1,90E-11                   | Yes-GBF                       | F-box-and-associated-interaction-domains-containing-protein                                               |
| AT5G24206    | chr5_8195618    | 0,37                   | 0,33±0,05                            | 3,10E-11                   | Yes-GBF                       | other-RNA                                                                                                 |
| AT3G25719    | chr3_9381875    | 0,39                   | 3,01±0,46                            | 4,17E-11                   | Yes-GBF                       | unknow function                                                                                           |
| AT1G78030    | chr1_29344914   | 0,35                   | 5,37±0,82                            | 7,22E-11                   | Yes-GBF                       | unknow function                                                                                           |
| AT2G24165    | chr2_10272756   | 0,26                   | 0,28±0,04                            | 8,64E-11                   | Yes-GBF                       | unknow function                                                                                           |
| AT1G22090    | chr1_7795619    | 0,46                   | 0,35±0,05                            | 9,70E-11                   | Yes-GBF                       | Protein-of-unknown-function-(DUF626)                                                                      |
| AT2G21045    | chr2_9028685    | 0,14                   | 4,84±0,76                            | 1,76E-10                   | Yes-GBF                       | HAC1                                                                                                      |
| AT1G70870    | chr1_26720882   | 0,24                   | 0,3±0,05                             | 4,39E-10                   | Yes-GBF                       | Polyketide-cyclase/dehydrase-and-lipid-transport-superfamily-protein                                      |
| AT4G09012    | chr4_5783151    | 0,51                   | 13,02±2,12                           | 7,81E-10                   | Yes-GBF                       | Mitochondrial-ribosomal-protein-L27                                                                       |
| AT3G46482    | chr3_17116461   | 0,22                   | 3,49±0,58                            | 1,44E-09                   | Yes-GBF                       | unknow function                                                                                           |
| AT3G53840    | chr3_19946789   | 0,55                   | 53,73±8,95                           | 1,93E-09                   | Yes-GBF                       | Protein-kinase-superfamily-protein                                                                        |
| AT3G59180    | chr3_21880703   | 0,13                   | 4,56±0,78                            | 5,78E-09                   | Yes-GBF                       | Protein-with-RNI-like/FBD-like-domains                                                                    |
| AT3G58480    | chr3_21625946   | 0,31                   | 0,35±0,06                            | 8,47E-09                   | Yes-GBF                       | calmodulin-binding-family-protein                                                                         |
| AT5G67040    | chr5_26759092   | 0,17                   | 3,37±0,59                            | 1,29E-08                   | Yes-GBF                       | Protein-of-unknown-function-(DUF295)                                                                      |
| AT5G40050    | chr5_16033293   | 0,31                   | 4,35±0,78                            | 2,26E-08                   | Yes-GBF                       | F-box/FBD-like-domains-containing-protein                                                                 |
| AT5G48350    | chr5_19593564   | 0,27                   | 3,98±0,72                            | 3,61E-08                   | Yes-GBF                       | Polynucleotidyl-transferase,-ribonuclease-H-like-superfamily-protein                                      |
| AT1G50050    | chr1_18548772   | 0,33                   | 0,31±0,06                            | 8,79E-08                   | Yes-GBF                       | CAP-(Cysteine-rich-secretory-proteins,-Antigen-5,-and-Pathogenesis-related-1-protein)-superfamily-protein |
| AT1G51990    | chr1_19330953   | 0,37                   | 0,34±0,06                            | 1,21E-07                   | Yes-GBF                       | O-methyltransferase-family-protein                                                                        |
| AT5G36240    | chr5_14280170   | 0,12                   | 0,28±0,05                            | 1,63E-07                   | Yes-GBF                       | zinc-knuckle-(CCHC-type)-family-protein                                                                   |
| AT1G73120    | chr1_27496441   | 0,26                   | 3,8±0,73                             | 1,74E-07                   | Yes-GBF                       | unknow function                                                                                           |
| AT5G24040    | chr5_8122802    | 0,1                    | 4,43±0,85                            | 1,89E-07                   | Yes-GBF                       | Protein-of-unknown-function-(DUF295)                                                                      |
| AT4G01335    | chr4_525881     | 0,3                    | 2,93±0,56                            | 1,93E-07                   | Yes-GBF                       | unknow function                                                                                           |
| AT2G10260    | chr2_3235177    | 0,22                   | 2,87±0,56                            | 2,92E-07                   | Yes-GBF                       | unknow function                                                                                           |
| AT5G22680    | chr5_7539592    | 0,32                   | 2,63±0,51                            | 3,07E-07                   | Yes-GBF                       | unknow function                                                                                           |
| AT2G29000    | chr2_12676615   | 0,37                   | 0,42±0,08                            | 3,23E-07                   | Yes-GBF                       | Leucine-rich-repeat-protein-kinase-family-protein                                                         |
| AT2G45940    | chr2_18981758   | 0,41                   | 0,43±0,09                            | 4,90E-07                   | Yes-GBF                       | Protein-of-unknown-function-(DUF295)                                                                      |

|           |               |      |           |          |      |                                                                          |
|-----------|---------------|------|-----------|----------|------|--------------------------------------------------------------------------|
| AT2G13128 | chr2_5419483  | 0,31 | 0,23±0,03 | 8,63E-18 | Yes  |                                                                          |
| AT5G54206 | chr5_22001192 | 0,17 | 0,18±0,02 | 1,17E-16 | Yes  |                                                                          |
| AT3G59190 | chr3_21877104 | 0,12 | 0,16±0,02 | 1,05E-15 | Yes  | F-box/RNI-like-superfamily-protein                                       |
| AT5G34830 | chr5_12253016 | 0,57 | 4,32±0,56 | 1,48E-14 | Yes  |                                                                          |
| AT5G47130 | chr5_19138652 | 0,39 | 0,29±0,04 | 2,31E-14 | Yes  | Bax-inhibitor-1-family-protein                                           |
| AT5G49420 | chr5_20036165 | 0,25 | 0,25±0,03 | 4,32E-14 | Yes  | MADS-box-transcription-factor-family-protein                             |
| AT5G03820 | chr5_1016502  | 0,49 | 0,24±0,03 | 1,06E-13 | Yes  | GDSL-like-Lipase/Acylhydrolase-family-protein                            |
| AT5G14290 | chr5_4618808  | 0,21 | 3,88±0,56 | 3,94E-12 | Yes  | Mitochondrial-ribosomal-protein-L37                                      |
| AT1G61070 | chr1_22493111 | 0,24 | 3,97±0,58 | 8,08E-12 | Yes  | low-molecular-weight-cysteine-rich-66                                    |
| AT4G06536 | chr4_3043219  | 0,1  | 0,19±0,03 | 3,72E-11 | Yes  | SPla/Ryanodine-receptor-(SPRY)-domain-containing-protein                 |
| AT2G12935 | chr2_5094798  | 0,09 | 5,47±0,83 | 5,21E-11 | Yes  |                                                                          |
| AT4G28790 | chr4_14228260 | 0,07 | 0,16±0,03 | 1,95E-10 | Yes  | basic-helix-loop-helix-(bHLH)-DNA-binding-superfamily-protein            |
| AT5G41650 | chr5_15873336 | 0,06 | 0,14±0,02 | 2,77E-10 | Yes  | Lactoylglutathione-lyase/-glyoxalase-I-family-protein                    |
| AT1G48390 | chr1_17880215 | 0,11 | 0,21±0,03 | 3,91E-10 | Yes  | RNI-like-superfamily-protein                                             |
| AT1G03660 | chr1_911682   | 0,06 | 0,14±0,02 | 4,17E-10 | Yes  | Ankyrin-repeat-containing-protein                                        |
| AT3G17150 | chr3_5846031  | 0,11 | 4,82±0,77 | 4,18E-10 | Yes  | Plant-invertase/pectin-methylesterase-inhibitor-superfamily-protein      |
| AT5G66970 | chr5_26734708 | 0,19 | 3,69±0,6  | 5,57E-10 | Yes  | P-loop-containing-nucleoside-triphosphate-hydrolases-superfamily-protein |
| AT2G25169 | chr2_10687471 | 0,06 | 6,8±1,12  | 1,10E-09 | Yes  |                                                                          |
| AT1G27045 | chr1_9458354  | 0,1  | 0,21±0,03 | 1,36E-09 | Yes  | Homeobox-leucine-zipper-protein-family                                   |
| AT1G51520 | chr1_19034219 | 0,11 | 0,22±0,04 | 1,91E-09 | Yes  | RNA-binding-(RRM/RBD/RNP-motifs)-family-protein                          |
| AT5G22555 | chr5_7487426  | 0,51 | 0,34±0,06 | 3,14E-09 | Yes  |                                                                          |
| AT1G70020 | chr1_26377295 | 0,35 | 0,36±0,06 | 4,15E-09 | Yes  | Protein-of-unknown-function-(DUF1163)                                    |
| AT3G30214 | chr3_11852746 | 0,58 | 11,15±1,9 | 4,74E-09 | Yes  |                                                                          |
| AT3G59620 | chr3_22023014 | 0,42 | 0,33±0,06 | 5,01E-09 | Yes  | Mannose-binding-lectin-superfamily-protein                               |
| AT1G62410 | chr1_23092977 | 0,19 | 3,33±0,57 | 5,32E-09 | Yes  | MIF4G-domain-containing-protein                                          |
| AT3G22940 | chr3_8127537  | 0,26 | 0,34±0,06 | 5,99E-09 | Yes  | F-box-associated-ubiquitination-effector-family-protein                  |
| AT3G42786 | chr3_15007014 | 0,06 | 6,18±1,06 | 6,05E-09 | Yes  |                                                                          |
| AT2G24735 | chr2_10527160 | 0,36 | 2,8±0,48  | 6,49E-09 | Yes  |                                                                          |
| AT1G67010 | chr1_24960535 | 0,49 | 0,39±0,07 | 1,36E-08 | Yes  |                                                                          |
| AT5G38750 | chr5_15516051 | 0,54 | 0,39±0,07 | 1,37E-08 | Yes  | asparaginyl-tRNA-synthetase-family                                       |
| AT5G37280 | chr5_14761553 | 0,1  | 4,8±0,85  | 1,72E-08 | Yes  | RING/U-box-superfamily-protein                                           |
| AT4G09600 | chr4_6073004  | 0,33 | 0,38±0,07 | 2,80E-08 | Yes  | GAST1-protein-homolog-3                                                  |
| AT5G60220 | chr5_23949615 | 0,18 | 0,31±0,06 | 3,45E-08 | Yes  | tetraspanin4                                                             |
| AT3G21570 | chr3_7601585  | 0,37 | 2,81±0,51 | 3,60E-08 | Yes  |                                                                          |
| AT3G62760 | chr3_23218672 | 0,19 | 3,08±0,56 | 3,78E-08 | Yes  | Glutathione-S-transferase-family-protein                                 |
| AT2G36550 | chr2_15327657 | 0,56 | 0,33±0,06 | 4,13E-08 | Yes  |                                                                          |
| AT1G19410 | chr1_6711880  | 0,28 | 3,59±0,67 | 1,01E-07 | Yes  | FBD/-Leucine-Rich-Repeat-domains-containing-protein                      |
| AT5G59340 | chr5_23935224 | 0,43 | 2,82±0,54 | 1,83E-07 | Yes  | WUSCHEL-related-homeobox-2                                               |
| AT4G01925 | chr4_929945   | 0,07 | 0,2±0,04  | 2,12E-07 | Yes  | Cysteine/Histidine-rich-C1-domain-family-protein                         |
| AT1G02830 | chr1_625899   | 0,13 | 3,35±0,66 | 3,76E-07 | Yes  | Ribosomal-L22e-protein-family                                            |
| AT1G14688 | chr1_5049711  | 0,33 | 2,53±0,5  | 4,09E-07 | Yes  |                                                                          |
| AT1G61542 | chr1_22703776 | 0,16 | 7,51±0,76 | 3,34E-23 | No,e | unknow function                                                          |

|           |               |      |              |          |      |                                                                      |
|-----------|---------------|------|--------------|----------|------|----------------------------------------------------------------------|
| AT2G16520 | chr2_7160242  | 0,27 | 5,29±0,56    | 3,86E-21 | No,e | unknow function                                                      |
| AT5G09445 | chr5_2943446  | 0,1  | 0,12±0,01    | 6,46E-19 | No,e |                                                                      |
| AT1G58150 | chr1_21522140 | 0,15 | 6,29±0,71    | 1,29E-18 | No,e | unknow function                                                      |
| AT2G07110 | chr2_2932104  | 0,12 | 0,14±0,02    | 1,86E-18 | No,e | unknow function                                                      |
| AT3G28193 | chr3_10515364 | 0,23 | 5,06±0,58    | 2,09E-18 | No,e |                                                                      |
| AT1G58130 | chr1_21522140 | 0,15 | 6,57±0,75    | 2,13E-18 | No,e | unknow function                                                      |
| AT5G38275 | chr5_15284919 | 0,34 | 0,24±0,03    | 2,42E-18 | No,e |                                                                      |
| AT1G64260 | chr1_23845471 | 0,21 | 0,2±0,02     | 4,47E-18 | No,e | MuDR-family-transposase                                              |
| AT5G34810 | chr5_12972884 | 0,59 | 8,23±0,95    | 6,41E-18 | No,e | transposable-element-gene                                            |
| AT5G42965 | chr5_17235489 | 0,19 | 5,39±0,63    | 1,86E-17 | No,e | Polynucleotidyl-transferase,-ribonuclease-H-like-superfamily-protein |
| AT2G12460 | chr2_5029104  | 0,22 | 0,2±0,02     | 2,16E-17 | No,e | transposable-element-gene                                            |
| AT5G35800 | chr5_13976331 | 0,65 | 0,12±0,01    | 2,18E-17 | No,e | transposable-element-gene                                            |
| AT5G11290 | chr5_3581269  | 0,44 | 7,35±0,87    | 2,77E-17 | No,e | Plant-protein-of-unknown-function-(DUF247)                           |
| AT5G53815 | chr5_21851007 | 0,26 | 0,23±0,03    | 3,14E-17 | No,e | transposable-element-gene                                            |
| AT2G07667 | chr2_3377361  | 0,48 | 6,57±0,79    | 7,90E-17 | No,e | unknow function                                                      |
| AT1G70885 | chr1_26723607 | 0,46 | 8,16±0,98    | 9,40E-17 | No,e | unknow function                                                      |
| AT5G45080 | chr5_18192961 | 0,16 | 5,49±0,68    | 6,21E-16 | No,e | phloem-protein-2-A6                                                  |
| AT1G62835 | chr1_23267657 | 0,29 | 0,22±0,03    | 8,95E-16 | No,e | unknow function                                                      |
| AT1G50530 | chr1_18726662 | 0,18 | 5,49±0,69    | 1,93E-15 | No,e | unknow function                                                      |
| AT3G13335 | chr3_4340453  | 0,17 | 0,2±0,02     | 2,11E-15 | No,e | pre-tRNA                                                             |
| AT5G35710 | chr5_13877980 | 0,21 | 5,07±0,64    | 2,92E-15 | No,e | transposable-element-gene                                            |
| AT5G35420 | chr5_13656899 | 0,39 | 0,26±0,03    | 3,91E-15 | No,e | transposable-element-gene                                            |
| AT5G45090 | chr5_18185205 | 0,3  | 3,97±0,51    | 5,83E-15 | No,e | phloem-protein-2-A7                                                  |
| AT5G45469 | chr5_18418449 | 0,39 | 5,03±0,65    | 7,58E-15 | No,e |                                                                      |
| AT3G60972 | chr3_22225185 | 0,29 | 0,26±0,03    | 9,56E-15 | No,e | other-RNA                                                            |
| AT1G72850 | chr1_27408422 | 0,21 | 4,77±0,62    | 1,10E-14 | No,e | Disease-resistance-protein-(TIR-NBS-class)                           |
| AT3G32904 | chr3_13450087 | 0,18 | 4,58±0,6     | 3,47E-14 | No,e |                                                                      |
| AT2G11280 | chr2_4474960  | 0,28 | 5,65±0,75    | 3,86E-14 | No,e | unknow function                                                      |
| AT4G01910 | chr4_327944   | 0,06 | 0,11±0,01    | 5,27E-14 | No,e | Cysteine/Histidine-rich-C1-domain-family-protein                     |
| AT4G01490 | chr4_637062   | 0,26 | 0,26±0,03    | 5,83E-14 | No,e | transposable-element-gene                                            |
| AT5G34800 | chr5_12151563 | 0,36 | 0,29±0,04    | 6,90E-14 | No,e | transposable-element-gene                                            |
| AT5G59616 | chr5_24046162 | 0,44 | 0,24±0,03    | 1,00E-13 | No,e | Interleukin-1-receptor-associated-kinase-4-protein                   |
| AT5G34795 | chr5_12251538 | 0,6  | 347,46±46,76 | 1,08E-13 | No,e |                                                                      |
| AT3G44444 | chr3_16069748 | 0,12 | 5,43±0,74    | 2,42E-13 | No,e | MIR849a;-miRNA                                                       |
| AT1G60110 | chr1_22174815 | 0,13 | 0,19±0,03    | 3,26E-13 | No,e | Mannose-binding-lectin-superfamily-protein                           |
| AT5G28440 | chr5_10367582 | 0,23 | 3,93±0,54    | 3,79E-13 | No,e | unknown-protein                                                      |
| AT5G27250 | chr5_9583825  | 0,15 | 5,15±0,71    | 5,86E-13 | No,e | transposable-element-gene                                            |
| AT2G05995 | chr2_2328708  | 0,15 | 0,21±0,03    | 6,38E-13 | No,e | other-RNA                                                            |
| AT4G32212 | chr4_15552870 | 0,06 | 0,13±0,02    | 1,86E-12 | No,e |                                                                      |
| AT2G15770 | chr2_6871331  | 0,17 | 0,23±0,03    | 2,12E-12 | No,e | Cupredoxin-superfamily-protein                                       |
| AT2G44390 | chr2_18329124 | 0,39 | 3,69±0,53    | 2,21E-12 | No,e | Cysteine/Histidine-rich-C1-domain-family-protein                     |
| AT1G52100 | chr1_19386721 | 0,06 | 0,13±0,02    | 2,44E-12 | No,e | Mannose-binding-lectin-superfamily-protein                           |

|           |               |      |           |          |      |                                                                                           |
|-----------|---------------|------|-----------|----------|------|-------------------------------------------------------------------------------------------|
| AT3G50450 | chr3_18722203 | 0,25 | 0,26±0,04 | 2,74E-12 | No,e | homolog-of-RPW8-1                                                                         |
| AT3G53080 | chr3_19676397 | 0,09 | 6,29±0,9  | 3,13E-12 | No,e | D-galactoside/L-rhamnose-binding-SUEL-lectin-protein                                      |
| AT3G14540 | chr3_4879136  | 0,34 | 0,29±0,04 | 3,40E-12 | No,e | Terpenoid-cyclases/Protein-prenyltransferases-superfamily-protein                         |
| AT3G28170 | chr3_10496945 | 0,21 | 3,78±0,55 | 4,00E-12 | No,e |                                                                                           |
| AT2G06917 | chr2_1927857  | 0,06 | 8,53±1,23 | 4,09E-12 | No,e | transposable-element-gene                                                                 |
| AT1G77235 | chr1_29007464 | 0,46 | 7,07±1,02 | 5,18E-12 | No,e | MICRORNA402 (MIR402)                                                                      |
| AT4G29300 | chr4_14433095 | 0,08 | 6,52±0,95 | 5,78E-12 | No,e | low-molecular-weight-cysteine-rich-27                                                     |
| AT5G59662 | chr5_24046162 | 0,44 | 5,08±0,74 | 5,92E-12 | No,e | other-RNA                                                                                 |
| AT3G26539 | chr3_9744326  | 0,1  | 0,17±0,03 | 6,62E-12 | No,e |                                                                                           |
| AT1G25141 | chr1_8794957  | 0,09 | 6,25±0,91 | 7,75E-12 | No,e | F-box-associated-ubiquitination-effector-family-protein                                   |
| AT4G12520 | chr4_7412141  | 0,25 | 0,26±0,04 | 8,41E-12 | No,e | Bifunctional-inhibitor/lipid-transfer-protein/seed-storage-2S-albumin-superfamily-protein |
| AT1G35280 | chr1_12946221 | 0,28 | 3,85±0,56 | 8,56E-12 | No,e | transposable-element-gene                                                                 |
| AT3G13270 | chr3_4294833  | 0,2  | 4,34±0,64 | 9,00E-12 | No,e | transposable-element-gene                                                                 |
| AT3G54363 | chr3_20133288 | 0,53 | 0,33±0,05 | 9,17E-12 | No,e |                                                                                           |
| AT1G19070 | chr1_6584881  | 0,19 | 0,23±0,03 | 9,78E-12 | No,e | F-box-family-protein                                                                      |
| AT2G04380 | chr2_1523480  | 0,15 | 4,33±0,64 | 1,42E-11 | No,e | unknow function                                                                           |
| AT4G09840 | chr4_6189560  | 0,19 | 0,25±0,04 | 1,61E-11 | No,e |                                                                                           |
| AT3G29764 | chr3_11613507 | 0,06 | 7,87±1,17 | 1,81E-11 | No,e |                                                                                           |
| AT2G11270 | chr2_4476413  | 0,34 | 5,38±0,8  | 1,82E-11 | No,e | citrate-synthase-related                                                                  |
| AT4G05631 | chr4_3313308  | 0,32 | 4,32±0,64 | 1,88E-11 | No,e |                                                                                           |
| AT2G05950 | chr2_2298593  | 0,34 | 0,29±0,04 | 2,25E-11 | No,e | transposable-element-gene                                                                 |
| AT4G09250 | chr4_5924252  | 0,51 | 6,37±0,96 | 2,80E-11 | No,e | SP1a/Ryanodine-receptor-(SPRY)-domain-containing-protein                                  |
| AT5G28860 | chr5_10697614 | 0,06 | 7,43±1,12 | 2,90E-11 | No,e | transposable-element-gene                                                                 |
| AT5G43040 | chr5_17258020 | 0,27 | 3,63±0,55 | 3,07E-11 | No,e | Cysteine/Histidine-rich-C1-domain-family-protein                                          |
| AT4G12382 | chr4_7327127  | 0,07 | 0,15±0,02 | 4,62E-11 | No,e | F-box-family-protein                                                                      |
| AT5G54040 | chr5_21920938 | 0,42 | 0,34±0,05 | 6,25E-11 | No,e | Cysteine/Histidine-rich-C1-domain-family-protein                                          |
| AT5G16486 | chr5_5384684  | 0,26 | 3,27±0,5  | 7,19E-11 | No,e | RNA-directed-DNA-polymerase-(reverse-transcriptase)-related-family-protein                |
| AT5G23065 | chr5_7736999  | 0,41 | 2,97±0,46 | 7,64E-11 | No,e | MIR162B;-miRNA                                                                            |
| AT1G15885 | chr1_5459026  | 0,09 | 5,8±0,89  | 8,53E-11 | No,e | unknow function                                                                           |
| AT4G03811 | chr4_1772158  | 0,26 | 0,28±0,04 | 1,26E-10 | No,e | other-RNA                                                                                 |
| AT1G20520 | chr1_7104762  | 0,15 | 0,24±0,04 | 1,34E-10 | No,e | Arabidopsis-protein-of-unknown-function-(DUF241)                                          |
| AT3G24929 | chr3_9120303  | 0,15 | 0,25±0,04 | 1,65E-10 | No,e |                                                                                           |
| AT3G25014 | chr3_9296271  | 0,07 | 6,2±0,97  | 1,95E-10 | No,e |                                                                                           |
| AT5G34790 | chr5_13043021 | 0,07 | 0,16±0,03 | 1,95E-10 | No,e | transposable-element-gene                                                                 |
| AT5G05282 | chr5_1565256  | 0,39 | 0,35±0,05 | 2,04E-10 | No,e | conserved-peptide-upstream-open-reading-frame-64                                          |
| AT1G31900 | chr1_11462269 | 0,18 | 0,25±0,04 | 2,28E-10 | No,e | unknow function                                                                           |
| AT5G28913 | chr5_11295973 | 0,5  | 0,36±0,06 | 2,53E-10 | No,e | transposable-element-gene                                                                 |
| AT1G35750 | chr1_13253071 | 0,25 | 0,3±0,05  | 2,72E-10 | No,e | pumilio-10                                                                                |
| AT2G27000 | chr2_11519531 | 0,17 | 0,26±0,04 | 2,93E-10 | No,e | cytochrome-P450,-family-705,-subfamily-A,-polypeptide-8                                   |
| AT2G27850 | chr2_12470885 | 0,26 | 3,33±0,53 | 3,49E-10 | No,e | pre-tRNA                                                                                  |
| AT3G33145 | chr3_14056096 | 0,15 | 4,26±0,68 | 4,58E-10 | No,e | transposable-element-gene                                                                 |
| AT2G15940 | chr2_6947019  | 0,29 | 0,33±0,05 | 4,59E-10 | No,e | transposable-element-gene                                                                 |

|           |               |      |           |          |      |                                                                                                           |
|-----------|---------------|------|-----------|----------|------|-----------------------------------------------------------------------------------------------------------|
| AT1G72870 | chr1_27425514 | 0,21 | 3,94±0,63 | 5,60E-10 | No,e | Disease-resistance-protein-(TIR-NBS-class)                                                                |
| AT1G25180 | chr1_9184262  | 0,08 | 0,18±0,03 | 6,41E-10 | No,e | unknow function                                                                                           |
| AT1G30935 | chr1_11015394 | 0,32 | 0,33±0,05 | 7,40E-10 | No,e | unknow function                                                                                           |
| AT4G03490 | chr4_1544498  | 0,43 | 0,36±0,06 | 8,22E-10 | No,e | Ankyrin-repeat-family-protein                                                                             |
| AT5G48780 | chr5_19769664 | 0,22 | 4,49±0,73 | 8,66E-10 | No,e | disease-resistance-protein-(TIR-NBS-class)                                                                |
| AT3G43303 | chr3_15221988 | 0,1  | 4,79±0,79 | 1,36E-09 | No,e | transposable-element-gene                                                                                 |
| AT1G61688 | chr1_23114405 | 0,07 | 5,84±0,97 | 1,53E-09 | No,e | Defensin-like-(DEFL)-family-protein                                                                       |
| AT4G09745 | chr4_5151551  | 0,07 | 5,84±0,97 | 1,53E-09 | No,e | transposable-element-gene                                                                                 |
| AT4G19090 | chr4_10425735 | 0,06 | 0,16±0,03 | 1,80E-09 | No,e | Protein-of-unknown-function-(DUF594)                                                                      |
| AT4G20230 | chr4_10918811 | 0,06 | 0,16±0,03 | 1,80E-09 | No,e | Terpenoid-cyclases/Protein-prenyltransferases-superfamily-protein                                         |
| AT4G27220 | chr4_13637554 | 0,49 | 0,38±0,06 | 1,87E-09 | No,e | NB-ARC-domain-containing-disease-resistance-protein                                                       |
| AT4G07408 | chr4_4190993  | 0,3  | 2,87±0,48 | 2,07E-09 | No,e |                                                                                                           |
| AT4G12990 | chr4_7592733  | 0,38 | 5,6±0,94  | 2,19E-09 | No,e |                                                                                                           |
| AT2G13660 | chr2_5690457  | 0,44 | 0,36±0,06 | 2,32E-09 | No,e | unknow function                                                                                           |
| AT4G04680 | chr4_2368681  | 0,39 | 2,8±0,47  | 2,41E-09 | No,e |                                                                                                           |
| AT5G48775 | chr5_19769604 | 0,26 | 4,56±0,77 | 2,83E-09 | No,e | other-RNA                                                                                                 |
| AT3G29786 | chr3_12432899 | 0,06 | 6,36±1,07 | 2,87E-09 | No,e | transposable-element-gene                                                                                 |
| AT2G07777 | chr2_2322938  | 0,08 | 0,19±0,03 | 3,04E-09 | No,e | ATP-synthase-9-mitochondrial                                                                              |
| AT4G03292 | chr4_1446046  | 0,38 | 2,69±0,45 | 3,13E-09 | No,e | Polynucleotidyl-transferase,-ribonuclease-H-like-superfamily-protein                                      |
| AT2G17160 | chr2_7437677  | 0,12 | 4,15±0,7  | 3,19E-09 | No,e | Interleukin-1-receptor-associated-kinase-4-protein                                                        |
| AT3G27809 | chr3_10296836 | 0,06 | 0,15±0,03 | 3,33E-09 | No,e |                                                                                                           |
| AT1G72852 | chr1_27408381 | 0,26 | 3,34±0,56 | 3,34E-09 | No,e | unknow function                                                                                           |
| AT3G21030 | chr3_7367733  | 0,3  | 3,74±0,63 | 3,76E-09 | No,e | transposable-element-gene                                                                                 |
| AT5G43770 | chr5_17588945 | 0,38 | 3,99±0,68 | 3,95E-09 | No,e | proline-rich-family-protein                                                                               |
| AT2G16550 | chr2_7172407  | 0,09 | 0,19±0,03 | 4,04E-09 | No,e | unknow function                                                                                           |
| AT4G03500 | chr4_1557953  | 0,36 | 0,36±0,06 | 4,63E-09 | No,e | Ankyrin-repeat-family-protein                                                                             |
| AT3G62490 | chr3_22225372 | 0,14 | 0,25±0,04 | 4,74E-09 | No,e | transposable-element-gene                                                                                 |
| AT4G09300 | chr4_5896840  | 0,26 | 3,07±0,53 | 4,79E-09 | No,e | LisH-and-RanBPM-domains-containing-protein                                                                |
| AT4G07820 | chr4_4702825  | 0,34 | 0,37±0,06 | 5,02E-09 | No,e | CAP-(Cysteine-rich-secretory-proteins,-Antigen-5,-and-Pathogenesis-related-1-protein)-superfamily-protein |
| AT3G45851 | chr3_16861459 | 0,44 | 0,28±0,05 | 5,20E-09 | No,e |                                                                                                           |
| AT1G23935 | chr1_8466494  | 0,42 | 0,36±0,06 | 5,75E-09 | No,e | unknow function                                                                                           |
| AT3G15320 | chr3_5152829  | 0,34 | 3,12±0,54 | 5,87E-09 | No,e | transposable-element-gene                                                                                 |
| AT5G03377 | chr5_817193   | 0,06 | 0,16±0,03 | 5,88E-09 | No,e |                                                                                                           |
| AT2G17043 | chr2_7404804  | 0,11 | 4,7±0,81  | 6,95E-09 | No,e | unknow function                                                                                           |
| AT5G23955 | chr5_8104721  | 0,09 | 0,22±0,04 | 8,95E-09 | No,e | transposable-element-gene                                                                                 |
| AT5G29560 | chr5_11044218 | 0,06 | 6,24±1,09 | 9,16E-09 | No,e | caleosin-related-family-protein                                                                           |
| AT2G15350 | chr2_5697276  | 0,06 | 0,16±0,03 | 9,16E-09 | No,e | fucosyltransferase-10                                                                                     |
| AT1G47915 | chr1_17983412 | 0,09 | 4,78±0,84 | 1,02E-08 | No,e | F-box-family-protein                                                                                      |
| AT1G50550 | chr1_18718957 | 0,44 | 0,33±0,06 | 1,02E-08 | No,e | unknow function                                                                                           |
| AT1G44940 | chr1_16994763 | 0,37 | 2,65±0,46 | 1,13E-08 | No,e | unknow function                                                                                           |
| AT1G32010 | chr1_11505353 | 0,23 | 3,34±0,58 | 1,16E-08 | No,e | myosin-heavy-chain-related                                                                                |
| AT4G09200 | chr4_5850272  | 0,46 | 4,08±0,72 | 1,21E-08 | No,e | SPla/Ryanodine-receptor-(SPRY)-domain-containing-protein                                                  |

|           |               |      |           |          |      |                                                                         |
|-----------|---------------|------|-----------|----------|------|-------------------------------------------------------------------------|
| AT5G26642 | chr5_9271988  | 0,12 | 4,08±0,72 | 1,21E-08 | No,e | transposable-element-gene                                               |
| AT3G44470 | chr3_16389683 | 0,18 | 3,33±0,59 | 1,29E-08 | No,e | transposable-element-gene                                               |
| AT4G01930 | chr4_823407   | 0,29 | 0,36±0,06 | 1,46E-08 | No,e | Cysteine/Histidine-rich-C1-domain-family-protein                        |
| AT2G11300 | chr2_4475297  | 0,26 | 3,33±0,59 | 1,51E-08 | No,e | transposable-element-gene                                               |
| AT2G46455 | chr2_19072315 | 0,37 | 0,38±0,07 | 1,56E-08 | No,e | OxaA/YidC-like-membrane-insertion-protein                               |
| AT1G22720 | chr1_7447447  | 0,13 | 4,43±0,78 | 1,60E-08 | No,e | Protein-kinase-superfamily-protein                                      |
| AT5G50665 | chr5_20664184 | 0,11 | 0,25±0,04 | 1,63E-08 | No,e |                                                                         |
| AT5G44569 | chr5_17963028 | 0,36 | 3,09±0,55 | 1,66E-08 | No,e |                                                                         |
| AT1G43590 | chr1_16413361 | 0,21 | 0,33±0,06 | 1,71E-08 | No,e | transposable-element-gene                                               |
| AT1G16620 | chr1_6529298  | 0,2  | 3,19±0,57 | 1,73E-08 | No,e | transposable-element-gene                                               |
| AT4G08430 | chr4_5322669  | 0,11 | 4,56±0,81 | 1,97E-08 | No,e | Ulp1-protease-family-protein                                            |
| AT5G42092 | chr5_16407954 | 0,06 | 0,18±0,03 | 2,05E-08 | No,e |                                                                         |
| AT5G36185 | chr5_14243034 | 0,11 | 0,23±0,04 | 2,06E-08 | No,e |                                                                         |
| AT2G44800 | chr2_18465031 | 0,06 | 0,17±0,03 | 2,07E-08 | No,e | 2-oxoglutarate-(2OG)-and-Fe(II)-dependent-oxygenase-superfamily-protein |
| AT1G33950 | chr1_12308998 | 0,3  | 0,35±0,06 | 2,27E-08 | No,e | Avirulence-induced-gene-(AIG1)-family-protein                           |
| AT5G59060 | chr5_23844434 | 0,14 | 3,66±0,66 | 2,35E-08 | No,e |                                                                         |
| AT3G29636 | chr3_11469465 | 0,06 | 6,27±1,12 | 2,44E-08 | No,e | transferase-related                                                     |
| AT2G05185 | chr2_2222789  | 0,09 | 0,23±0,04 | 3,20E-08 | No,e | unknow function                                                         |
| AT5G22608 | chr5_7501851  | 0,5  | Inf±Inf   | 3,45E-08 | No,e |                                                                         |
| AT3G26235 | chr3_9632586  | 0,6  | 0,3±0,06  | 3,94E-08 | No,e |                                                                         |
| AT5G48210 | chr5_20062490 | 0,08 | 4,76±0,87 | 4,35E-08 | No,e | Protein-of-unknown-function-(DUF1278)                                   |
| AT5G55790 | chr5_22571442 | 0,07 | 0,2±0,04  | 4,42E-08 | No,e |                                                                         |
| AT5G12090 | chr5_3911124  | 0,1  | 4,32±0,8  | 6,31E-08 | No,e | Protein-kinase-superfamily-protein                                      |
| AT2G13760 | chr2_5714445  | 0,41 | 2,46±0,46 | 6,50E-08 | No,e | unknow function                                                         |
| AT3G43826 | chr3_15671078 | 0,24 | 0,36±0,07 | 6,55E-08 | No,e |                                                                         |
| AT5G46010 | chr5_18653506 | 0,14 | 3,47±0,65 | 7,89E-08 | No,e | Homeodomain-like-superfamily-protein                                    |
| AT3G30812 | chr3_11740096 | 0,1  | 4,04±0,75 | 8,32E-08 | No,e |                                                                         |
| AT2G14020 | chr2_6293350  | 0,09 | 4,56±0,85 | 8,33E-08 | No,e | transposable-element-gene                                               |
| AT3G23085 | chr3_8209322  | 0,5  | 3,54±0,66 | 9,21E-08 | No,e | transposable-element-gene                                               |
| AT5G28671 | chr5_10690624 | 0,59 | 2,83±0,53 | 9,64E-08 | No,e | transposable-element-gene                                               |
| AT2G01360 | chr2_174116   | 0,28 | 2,81±0,53 | 1,01E-07 | No,e | pentatricopeptide-(PPR)-repeat-containing-protein                       |
| AT5G32434 | chr5_11657908 | 0,11 | 3,89±0,73 | 1,01E-07 | No,e | transposable-element-gene                                               |
| AT4G04409 | chr4_1610995  | 0,21 | 0,35±0,07 | 1,05E-07 | No,e |                                                                         |
| AT5G20750 | chr5_7031063  | 0,48 | 0,42±0,08 | 1,23E-07 | No,e | transposable-element-gene                                               |
| AT1G57850 | chr1_21424565 | 0,3  | 3,68±0,7  | 1,25E-07 | No,e | Toll-Interleukin-Resistance-(TIR)-domain-family-protein                 |
| AT4G19095 | chr4_10458746 | 0,3  | 0,39±0,07 | 1,26E-07 | No,e |                                                                         |
| AT4G17512 | chr4_9464355  | 0,19 | 3,15±0,6  | 1,57E-07 | No,e |                                                                         |
| AT5G05400 | chr5_1596755  | 0,44 | 0,42±0,08 | 1,60E-07 | No,e | LRR-and-NB-ARC-domains-containing-disease-resistance-protein            |
| AT5G32436 | chr5_11621803 | 0,13 | 3,66±0,7  | 1,71E-07 | No,e | transposable-element-gene                                               |
| AT2G07000 | chr2_2902135  | 0,53 | 4,77±0,92 | 1,94E-07 | No,e | unknow function                                                         |
| AT3G44805 | chr3_16349893 | 0,29 | 0,39±0,08 | 2,52E-07 | No,e | TRAF-like-superfamily-protein                                           |
| AT2G06550 | chr2_2732433  | 0,41 | 4,25±0,83 | 2,55E-07 | No,e | transposable-element-gene                                               |

|           |               |      |           |          |      |                                                                                           |
|-----------|---------------|------|-----------|----------|------|-------------------------------------------------------------------------------------------|
| AT5G39070 | chr5_15636156 | 0,3  | 0,37±0,07 | 2,87E-07 | No,e | transposable-element-gene                                                                 |
| AT4G04110 | chr4_2230922  | 0,16 | 3,26±0,64 | 3,04E-07 | No,e | Toll-Interleukin-Resistance-(TIR)-domain-family-protein                                   |
| AT5G27889 | chr5_9903730  | 0,14 | 3,34±0,65 | 3,11E-07 | No,e |                                                                                           |
| AT4G06551 | chr4_3757309  | 0,07 | 4,98±0,98 | 3,41E-07 | No,e | transposable-element-gene                                                                 |
| AT3G25573 | chr3_8551425  | 0,09 | 4,6±0,9   | 3,47E-07 | No,e |                                                                                           |
| AT2G38220 | chr2_16017043 | 0,29 | 0,37±0,07 | 3,65E-07 | No,e | ABERRANT POLLEN DEVELOPMENT 3, APD3                                                       |
| AT1G24388 | chr1_8641496  | 0,2  | 3,55±0,7  | 3,70E-07 | No,e | unknow function                                                                           |
| AT3G62475 | chr3_23091510 | 0,27 | 3,13±0,64 | 8,82E-07 | No,e | transposable-element-gene                                                                 |
| AT3G48346 | chr3_17899107 | 0,34 | 5,43±0,59 | 2,54E-20 | No   | unknow function                                                                           |
| AT3G47410 | chr3_17469057 | 0,26 | 0,19±0,02 | 4,93E-19 | No   | unknow function                                                                           |
| AT3G20935 | chr3_7329829  | 0,09 | 0,11±0,01 | 1,14E-18 | No   | cytochrome-P450,-family-705,-subfamily-A,-polypeptide-28                                  |
| AT2G13130 | chr2_5419483  | 0,31 | 0,25±0,03 | 2,85E-16 | No   | unknow function                                                                           |
| AT5G09490 | chr5_2952537  | 0,17 | 0,2±0,02  | 2,11E-15 | No   | Ribosomal-protein-S19-family-protein                                                      |
| AT3G03280 | chr3_765798   | 0,37 | 4,53±0,57 | 3,23E-15 | No   | unknow function                                                                           |
| AT2G03360 | chr2_1024173  | 0,09 | 0,15±0,02 | 4,53E-13 | No   | Glycosyltransferase-family-61-protein                                                     |
| AT4G01230 | chr4_528694   | 0,06 | 0,11±0,02 | 4,78E-13 | No   | Reticulon-family-protein                                                                  |
| AT4G01420 | chr4_583422   | 0,12 | 0,2±0,03  | 7,49E-12 | No   | CALCINEURIN B-LIKE PROTEIN 5 (CBL5)                                                       |
| AT4G28365 | chr4_14033745 | 0,24 | 0,29±0,04 | 1,14E-11 | No   | early-nodulin-like-protein-3                                                              |
| AT1G05770 | chr1_1727707  | 0,2  | 0,27±0,04 | 1,50E-11 | No   | Mannose-binding-lectin-superfamily-protein                                                |
| AT2G05300 | chr2_1931621  | 0,07 | 0,15±0,02 | 4,62E-11 | No   | unknow function                                                                           |
| AT5G46915 | chr5_18857822 | 0,06 | 0,13±0,02 | 8,27E-11 | No   | transcriptional-factor-B3-family-protein                                                  |
| AT1G32570 | chr1_11777767 | 0,14 | 4,92±0,76 | 9,13E-11 | No   | unknow function                                                                           |
| AT3G16440 | chr3_5591618  | 0,06 | 0,15±0,02 | 9,96E-11 | No   | myosinase-binding-protein-like-protein-300B                                               |
| AT4G19080 | chr4_10446003 | 0,3  | 0,33±0,05 | 1,42E-10 | No   | Protein-of-unknown-function-(DUF594)                                                      |
| AT3G16590 | chr3_5650988  | 0,44 | 7,03±1,1  | 1,47E-10 | No   | F-box-and-associated-interaction-domains-containing-protein                               |
| AT3G03230 | chr3_748863   | 0,13 | 0,23±0,04 | 1,56E-10 | No   | alpha/beta-Hydrolases-superfamily-protein                                                 |
| AT4G19829 | chr4_10769359 | 0,35 | 0,33±0,05 | 1,82E-10 | No   | unknow function                                                                           |
| AT1G66600 | chr1_24217798 | 0,06 | 0,14±0,02 | 3,22E-10 | No   | AtWRKY63                                                                                  |
| AT2G44383 | chr2_18330255 | 0,6  | 3,92±0,62 | 3,50E-10 | No   | unknow function                                                                           |
| AT3G28060 | chr3_10446335 | 0,31 | 0,34±0,05 | 3,51E-10 | No   | Nodulin-MtN21-/EamA-like-transporter-family-protein                                       |
| AT1G13430 | chr1_4601762  | 0,51 | 0,36±0,06 | 3,87E-10 | No   | sulfotransferase-4C                                                                       |
| AT1G22680 | chr1_7537404  | 0,06 | 0,14±0,02 | 4,17E-10 | No   | unknow function                                                                           |
| AT5G22490 | chr5_7491397  | 0,27 | 0,32±0,05 | 5,02E-10 | No   | O-acyltransferase-(WSD1-like)-family-protein                                              |
| AT4G12510 | chr4_7419182  | 0,31 | 0,32±0,05 | 5,37E-10 | No   | Bifunctional-inhibitor/lipid-transfer-protein/seed-storage-2S-albumin-superfamily-protein |
| AT1G60750 | chr1_21859114 | 0,11 | 0,22±0,04 | 5,87E-10 | No   | NAD(P)-linked-oxidoreductase-superfamily-protein                                          |
| AT3G57270 | chr3_22031771 | 0,06 | 0,15±0,02 | 1,10E-09 | No   | BETA-1,3-GLUCANASE 1                                                                      |
| AT5G04210 | chr5_546273   | 0,1  | 0,21±0,03 | 1,36E-09 | No   | CCCH-type-zinc-fingerfamily-protein-with-RNA-binding-domain                               |
| AT4G02850 | chr4_597373   | 0,06 | 0,15±0,02 | 1,41E-09 | No   | D-AMINO ACID RACEMASE1, DAAR1                                                             |
| AT3G06545 | chr3_2568920  | 0,06 | 6,14±1,02 | 1,80E-09 | No   | unknow function                                                                           |
| AT4G16105 | chr4_9048095  | 0,06 | 6,85±1,15 | 2,54E-09 | No   | pre-tRNA                                                                                  |
| AT2G28440 | chr2_12732439 | 0,07 | 0,18±0,03 | 4,06E-09 | No   | proline-rich-family-protein                                                               |
| AT3G26480 | chr3_9690338  | 0,39 | 0,37±0,06 | 4,30E-09 | No   | Transducin-family-protein-/WD-40-repeat-family-protein                                    |



|           |               |      |            |          |    |                                                                                           |
|-----------|---------------|------|------------|----------|----|-------------------------------------------------------------------------------------------|
| AT4G27890 | chr4_13885908 | 0,24 | 0,33±0,06  | 5,05E-09 | No | HSP20-like-chaperones-superfamily-protein                                                 |
| AT5G28230 | chr5_10193083 | 0,5  | 6,37±1,09  | 5,09E-09 | No | unknow function                                                                           |
| AT5G17110 | chr5_5895166  | 0,11 | 0,24±0,04  | 5,09E-09 | No | Cystatin/monellin-superfamily-protein                                                     |
| AT2G15610 | chr2_6812189  | 0,09 | 4,68±0,8   | 5,28E-09 | No | Protein-of-unknown-function-(DUF1685)                                                     |
| AT4G20420 | chr4_11015485 | 0,44 | 3,02±0,52  | 5,67E-09 | No | Tapetum-specific-protein-TAP35/TAP44                                                      |
| AT1G44674 | chr1_17468129 | 0,06 | 6,65±1,14  | 5,69E-09 | No | Protein-of-unknown-function-(DUF1664)                                                     |
| AT3G59460 | chr3_22174226 | 0,56 | 0,24±0,04  | 6,08E-09 | No | unknow function                                                                           |
| AT2G19500 | chr2_8168512  | 0,07 | 0,18±0,03  | 6,14E-09 | No | CYTOKININ OXIDASE 2 (CKX2)                                                                |
| AT4G22460 | chr4_11839617 | 0,29 | 0,32±0,06  | 6,44E-09 | No | Bifunctional-inhibitor/lipid-transfer-protein/seed-storage-2S-albumin-superfamily-protein |
| AT1G50520 | chr1_18724446 | 0,45 | 0,37±0,06  | 6,64E-09 | No | cytochrome-P450,-family-705,-subfamily-A,-polypeptide-27                                  |
| AT4G36740 | chr4_17549071 | 0,13 | 0,26±0,04  | 6,95E-09 | No | homeobox-protein-40                                                                       |
| AT1G48180 | chr1_17797167 | 0,18 | 0,29±0,05  | 7,56E-09 | No | unknow function                                                                           |
| AT3G50373 | chr3_19561243 | 0,08 | 5,11±0,89  | 7,91E-09 | No | unknow function                                                                           |
| AT4G22230 | chr4_10808675 | 0,08 | 0,2±0,03   | 7,92E-09 | No | Arabidopsis-defensin-like-protein                                                         |
| AT2G44780 | chr2_17926729 | 0,06 | 6,24±1,09  | 9,16E-09 | No | unknow function                                                                           |
| AT4G29305 | chr4_14044368 | 0,06 | 6,24±1,09  | 9,16E-09 | No | low-molecular-weight-cysteine-rich-25                                                     |
| AT3G55590 | chr3_20700450 | 0,06 | 0,16±0,03  | 9,16E-09 | No | Glucose-1-phosphate-adenylyltransferase-family-protein                                    |
| AT5G60140 | chr5_24954904 | 0,06 | 0,16±0,03  | 9,16E-09 | No | AP2/B3-like-transcriptional-factor-family-protein                                         |
| AT2G17080 | chr2_7433437  | 0,54 | 0,27±0,05  | 1,21E-08 | No | Arabidopsis-protein-of-unknown-function-(DUF241)                                          |
| AT2G40440 | chr2_15976280 | 0,06 | 0,17±0,03  | 1,22E-08 | No | BTB/POZ-domain-containing-protein                                                         |
| AT5G48050 | chr5_19465476 | 0,3  | 0,36±0,06  | 1,25E-08 | No | unknow function                                                                           |
| AT5G10880 | chr5_3431828  | 0,1  | 0,23±0,04  | 1,34E-08 | No | tRNA-synthetase-related-/tRNA-ligase-related                                              |
| AT3G09240 | chr3_2073507  | 0,13 | 0,26±0,05  | 1,43E-08 | No | Protein-kinase-protein-with-tetratricopeptide-repeat-domain                               |
| AT5G56368 | chr5_22822204 | 0,09 | 4,73±0,84  | 1,95E-08 | No | unknow function                                                                           |
| AT3G26742 | chr3_9836139  | 0,07 | 0,19±0,03  | 2,02E-08 | No | unknow function                                                                           |
| AT2G23970 | chr2_10862861 | 0,08 | 0,2±0,04   | 2,33E-08 | No | Class-I-glutamine-amidotransferase-like-superfamily-protein                               |
| AT1G61160 | chr1_22544801 | 0,21 | 0,33±0,06  | 2,44E-08 | No | unknow function                                                                           |
| AT1G15772 | chr1_4560811  | 0,12 | 0,26±0,05  | 2,83E-08 | No | unknow function                                                                           |
| AT4G13860 | chr4_8024486  | 0,67 | 49,54±8,95 | 3,07E-08 | No | RNA-binding-(RRM/RBD/RNP-motifs)-family-protein                                           |
| AT5G37072 | chr5_14654563 | 0,1  | 0,23±0,04  | 3,60E-08 | No | unknow function                                                                           |
| AT1G32710 | chr1_11832701 | 0,16 | 3,38±0,61  | 3,63E-08 | No | Cytochrome-c-oxidase,-subunit-Vib-family-protein                                          |
| AT5G52600 | chr5_21155836 | 0,08 | 0,21±0,04  | 4,35E-08 | No | myb-domain-protein-82                                                                     |
| AT4G05497 | chr4_2779656  | 0,21 | 0,34±0,06  | 4,61E-08 | No | RNI-like-superfamily-protein                                                              |
| AT4G33930 | chr4_16270624 | 0,51 | 4,77±0,87  | 4,92E-08 | No | Cupredoxin-superfamily-protein                                                            |
| AT2G47660 | chr2_18957842 | 0,06 | 5,35±0,98  | 4,96E-08 | No | unknow function                                                                           |
| AT2G26211 | chr2_11160207 | 0,14 | 0,27±0,05  | 5,00E-08 | No | MIR825a;-miRNA                                                                            |
| AT3G27440 | chr3_9690941  | 0,11 | 0,25±0,05  | 5,06E-08 | No | uridine-kinase-like-5                                                                     |
| AT1G69990 | chr1_26363570 | 0,34 | 5,3±0,98   | 6,19E-08 | No | Leucine-rich-repeat-protein-kinase-family-protein                                         |
| AT3G27620 | chr3_10230473 | 0,39 | 0,4±0,07   | 6,46E-08 | No | ALTERNATIVE OXIDASE 1C (AOX1C)                                                            |
| AT3G28310 | chr3_10557784 | 0,24 | 4,2±0,78   | 7,03E-08 | No | Protein-of-unknown-function-(DUF677)                                                      |
| AT4G05170 | chr4_2660358  | 0,26 | 0,37±0,07  | 8,27E-08 | No | basic-helix-loop-helix-(bHLH)-DNA-binding-superfamily-protein                             |
| AT3G13432 | chr3_4841943  | 0,19 | 0,33±0,06  | 8,89E-08 | No | unknow function                                                                           |

|           |               |      |           |          |    |                                                                                           |
|-----------|---------------|------|-----------|----------|----|-------------------------------------------------------------------------------------------|
| AT2G03972 | chr2_1256591  | 0,24 | 0,35±0,07 | 9,56E-08 | No | unknow function                                                                           |
| AT5G44065 | chr5_17732661 | 0,31 | 0,37±0,07 | 1,04E-07 | No | unknow function                                                                           |
| AT4G34800 | chr4_16598096 | 0,17 | 0,32±0,06 | 1,04E-07 | No | SAUR-like-auxin-responsive-protein-family-                                                |
| AT4G12530 | chr4_7403214  | 0,28 | 2,75±0,52 | 1,17E-07 | No | Bifunctional-inhibitor/lipid-transfer-protein/seed-storage-2S-albumin-superfamily-protein |
| AT1G24010 | chr1_8524105  | 0,29 | 2,95±0,56 | 1,31E-07 | No | Polyketide-cyclase/dehydrase-and-lipid-transport-superfamily-protein                      |
| AT5G37050 | chr5_14641068 | 0,31 | 0,38±0,07 | 1,32E-07 | No | unknow function                                                                           |
| AT1G33500 | chr1_12158521 | 0,11 | 0,25±0,05 | 1,36E-07 | No | unknow function                                                                           |
| AT4G01260 | chr4_823678   | 0,09 | 4,1±0,78  | 1,52E-07 | No | DNA-binding-storekeeper-protein-related-transcriptional-regulator                         |
| AT5G03860 | chr5_896614   | 0,09 | 0,24±0,05 | 1,52E-07 | No | malate-synthase                                                                           |
| AT1G36340 | chr1_13654375 | 0,32 | 2,74±0,52 | 1,61E-07 | No | ubiquitin-conjugating-enzyme-31                                                           |
| AT2G38830 | chr2_15979271 | 0,15 | 0,31±0,06 | 1,61E-07 | No | Ubiquitin-conjugating-enzyme/RWD-like-protein                                             |
| AT4G34810 | chr4_16578580 | 0,06 | 0,2±0,04  | 1,82E-07 | No | SAUR-like-auxin-responsive-protein-family-                                                |
| AT4G29340 | chr4_14639984 | 0,21 | 0,36±0,07 | 2,32E-07 | No | profilin-4                                                                                |
| AT1G70840 | chr1_26737635 | 0,15 | 0,31±0,06 | 3,59E-07 | No | MLP-like-protein-31                                                                       |
| AT4G37230 | chr4_17519865 | 0,39 | 2,35±0,47 | 5,44E-07 | No | Photosystem-II-manganese-stabilising-protein-(PsbO)-family                                |

aMAF: Minor Allele Frequency; a±SE: bLog odds ratio±Standard Error; cP-value: Raw p-value from GWA analysis; dReplicated: Locus replication in DUBIN collection of Swedish Accessions (Yes-GBF/Yes: Significant after Bonferroni correction for Genome-Wide SNPs (Yes-GBF) or SNPs in 1 Mb region surrounding peak SNP(Yes); No,e: Gene could not be tested as no expression in replication dataset; No: No significance after Bonferroni correction)

**Table S3: 81 cis-eQTL detected in the population of 140 wild-collected *A. thaliana* accessions that were replicated in the population of 107 wild-collected Swedish *A. thaliana* accessions.**

| <i>Locus</i> | <i>a</i> SNP  | <i>b</i> Genotype | <i>Schmitz-data</i>        |              |                  | <i>Dubin-data</i>          |              |                  |
|--------------|---------------|-------------------|----------------------------|--------------|------------------|----------------------------|--------------|------------------|
|              |               |                   | <i>c</i> Log odds ratio±SE | <i>d</i> MAF | <i>e</i> P-value | <i>c</i> Log odds ratio±SE | <i>d</i> MAF | <i>e</i> P-value |
| AT1G02830    | chr1_624687   | C/C               | 2.97±0.59                  | 0.29         | 5.51E-07         | 1.89±0.61                  | 0.2          | 1.82E-03         |
| AT1G03660    | chr1_926200   | A/A               | 0.33±0.09                  | 0.32         | 1.29E-04         | 0.45±0.13                  | 0.5          | 4.35E-04         |
| AT1G05780    | chr1_1730502  | C/C               | 0.32±0.07                  | 0.06         | 8.55E-07         | 0.18±0.02                  | 0.29         | 5.01E-14         |
| AT1G11370    | chr1_3828411  | T/T               | 3.79±0.61                  | 0.06         | 3.77E-10         | 4.94±0.78                  | 0.1          | 2.48E-10         |
| AT1G14688    | chr1_5130918  | C/C               | 0.57±0.25                  | 0.09         | 2.09E-02         | 2.23±0.74                  | 0.28         | 2.67E-03         |
| AT1G19410    | chr1_6703778  | A/A               | 3.29±0.62                  | 0.06         | 1.33E-07         | 1.99±0.65                  | 0.2          | 2.23E-03         |
| AT1G22090    | chr1_7796024  | T/T               | 3.02±0.68                  | 0.39         | 8.90E-06         | 0.19±0.02                  | 0.38         | 1.52E-15         |
| AT1G27045    | chr1_9947683  | A/A               | 2.19±1.1                   | 0.33         | 4.71E-02         | 2.06±0.67                  | 0.07         | 2.02E-03         |
| AT1G33930    | chr1_12308998 | T/T               | 0.28±0.04                  | 0.06         | 4.41E-13         | 0.22±0.03                  | 0.23         | 1.01E-13         |
| AT1G34100    | chr1_12399605 | A/A               | 19.39±2.32                 | 0.07         | 6.09E-17         | 0.27±0.05                  | 0.06         | 1.30E-07         |
| AT1G48390    | chr1_17879580 | A/A               | 0.32±0.07                  | 0.42         | 8.55E-07         | 0.55±0.17                  | 0.31         | 1.63E-03         |
| AT1G50050    | chr1_18564085 | C/C               | 2.13±0.97                  | 0.2          | 2.86E-02         | 3.44±1.29                  | 0.25         | 7.68E-03         |
| AT1G51520    | chr1_19053511 | T/T               | 0.49±0.15                  | 0.12         | 8.64E-04         | 2.01±0.63                  | 0.21         | 1.34E-03         |
| AT1G51990    | chr1_19304765 | G/G               | 2.35±0.5                   | 0.16         | 2.09E-06         | 0.36±0.08                  | 0.21         | 4.87E-06         |
| AT1G61070    | chr1_22320587 | A/A               | 0.56±0.27                  | 0.09         | 4.08E-02         | 6.46±1.53                  | 0.5          | 2.47E-05         |
| AT1G62410    | chr1_23196263 | T/T               | 2.01±0.58                  | 0.09         | 5.16E-04         | 2.75±1.04                  | 0.2          | 8.20E-03         |
| AT1G64235    | chr1_23877480 | T/T               | 3±0.6                      | 0.16         | 4.59E-07         | 9.26±1                     | 0.27         | 1.58E-20         |
| AT1G67010    | chr1_24961784 | A/A               | 3.1±0.88                   | 0.26         | 4.00E-04         | 0.38±0.13                  | 0.07         | 4.54E-03         |
| AT1G67148    | chr1_25121971 | A/A               | 0.26±0.04                  | 0.53         | 3.53E-12         | 2.08±0.65                  | 0.24         | 1.52E-03         |
| AT1G70020    | chr1_26377468 | C/C               | 0.33±0.06                  | 0.06         | 1.05E-08         | 2.48±0.52                  | 0.08         | 1.85E-06         |
| AT1G70870    | chr1_26719733 | G/G               | 0.3±0.05                   | 0.12         | 1.55E-09         | 0.24±0.05                  | 0.36         | 5.33E-07         |
| AT1G73120    | chr1_27497719 | G/G               | 3.33±0.73                  | 0.06         | 4.61E-06         | 4.2±0.75                   | 0.11         | 2.33E-08         |
| AT1G76830    | chr1_28830886 | A/A               | 1.71±0.7                   | 0.26         | 1.38E-02         | 6.46±1.53                  | 0.38         | 2.47E-05         |
| AT1G78030    | chr1_29342131 | A/A               | 0.43±0.09                  | 0.32         | 9.54E-07         | 4.65±0.64                  | 0.2          | 3.34E-13         |
| AT2G04830    | chr2_1693588  | A/A               | 5.52±0.76                  | 0.19         | 4.84E-13         | 2.5±0.73                   | 0.31         | 5.95E-04         |

|           |               |     |           |      |          |           |      |          |
|-----------|---------------|-----|-----------|------|----------|-----------|------|----------|
| AT2G05117 | chr2_1831031  | T/T | 0.27±0.04 | 0.19 | 4.86E-13 | 0.11±0.02 | 0.1  | 1.12E-09 |
| AT2G10260 | chr2_3235727  | G/G | 2.63±0.54 | 0.19 | 1.08E-06 | 0.35±0.13 | 0.36 | 7.31E-03 |
| AT2G12935 | chr2_5190356  | A/A | 2.34±0.57 | 0.3  | 3.86E-05 | 2.4±1.07  | 0.42 | 2.58E-02 |
| AT2G13128 | chr2_5108880  | T/T | 0.3±0.05  | 0.64 | 1.52E-08 | 0.6±0.29  | 0.27 | 3.64E-02 |
| AT2G15930 | chr2_6939722  | A/A | 3.32±0.54 | 0.06 | 9.21E-10 | 4.18±0.82 | 0.24 | 3.36E-07 |
| AT2G21045 | chr2_8997433  | A/A | 4.56±0.81 | 0.06 | 1.97E-08 | 4.3±0.76  | 0.09 | 1.50E-08 |
| AT2G24165 | chr2_10272982 | A/A | 0.27±0.04 | 0.05 | 2.17E-10 | 0.16±0.02 | 0.07 | 3.45E-12 |
| AT2G24735 | chr2_10523189 | C/C | 3.73±0.65 | 0.06 | 8.47E-09 | 3.18±0.61 | 0.36 | 2.12E-07 |
| AT2G25169 | chr2_10851248 | T/T | 0.92±6.21 | 0.29 | 8.82E-01 | 5.64±2.05 | 0.28 | 5.88E-03 |
| AT2G29000 | chr2_12631021 | A/A | 2.11±0.6  | 0.42 | 4.49E-04 | 2.51±0.77 | 0.25 | 1.15E-03 |
| AT2G36550 | chr2_15327657 | A/A | 0.33±0.06 | 0.53 | 4.13E-08 | 0.2±0.05  | 0.27 | 9.16E-05 |
| AT2G45940 | chr2_18902487 | C/C | 0.46±0.11 | 0.12 | 3.75E-05 | 0.29±0.08 | 0.47 | 5.08E-04 |
| AT3G17150 | chr3_5842339  | G/G | 2.38±0.63 | 0.46 | 1.60E-04 | 2.25±0.89 | 0.24 | 1.12E-02 |
| AT3G21570 | chr3_7727067  | A/A | 3.44±0.97 | 0.54 | 3.78E-04 | 1.92±0.58 | 0.5  | 8.59E-04 |
| AT3G22940 | chr3_8127537  | G/G | 0.34±0.06 | 0.21 | 5.99E-09 | 0.57±0.2  | 0.21 | 4.31E-03 |
| AT3G25719 | chr3_9381875  | G/G | 3.01±0.46 | 0.22 | 4.17E-11 | 0.11±0.01 | 0.35 | 4.19E-14 |
| AT3G25720 | chr3_9381875  | G/G | 3.27±0.46 | 0.22 | 1.06E-12 | 0.12±0.02 | 0.35 | 1.91E-15 |
| AT3G30214 | chr3_11891239 | T/T | 0.43±0.09 | 0.43 | 6.08E-07 | 3.83±1.08 | 0.15 | 3.78E-04 |
| AT3G42786 | chr3_14917003 | G/G | 1.52±0.67 | 0.38 | 2.41E-02 | 4.29±1.41 | 0.26 | 2.38E-03 |
| AT3G46482 | chr3_17105125 | C/C | 4.67±0.93 | 0.06 | 5.45E-07 | 3.67±0.61 | 0.1  | 1.92E-09 |
| AT3G53840 | chr3_19949277 | C/C | 0.52±0.14 | 0.39 | 1.79E-04 | 0.38±0.08 | 0.13 | 1.51E-06 |
| AT3G58480 | chr3_21628568 | T/T | 0.39±0.08 | 0.31 | 2.28E-06 | 0.23±0.03 | 0.21 | 2.70E-11 |
| AT3G59180 | chr3_21760130 | A/A | 2.22±0.57 | 0.07 | 1.05E-04 | 1.64±0.7  | 0.07 | 1.90E-02 |
| AT3G59190 | chr3_22175616 | T/T | 0.23±0.04 | 0.22 | 1.45E-08 | 0.54±0.27 | 0.28 | 4.75E-02 |
| AT3G59620 | chr3_22023014 | C/C | 0.33±0.06 | 0.06 | 5.01E-09 | 0.2±0.08  | 0.06 | 1.76E-02 |
| AT3G62760 | chr3_23189064 | T/T | 0.43±0.14 | 0.11 | 1.80E-03 | 1.96±0.9  | 0.1  | 2.86E-02 |
| AT4G01190 | chr4_506690   | C/C | 42.47±6.2 | 0.54 | 7.44E-12 | 3.96±0.55 | 0.36 | 4.88E-13 |
| AT4G01335 | chr4_463836   | T/T | 2.42±0.97 | 0.56 | 1.29E-02 | 8.81±1.75 | 0.45 | 5.11E-07 |
| AT4G01925 | chr4_822143   | A/A | 4.16±0.89 | 0.08 | 3.32E-06 | 2.51±0.63 | 0.43 | 6.66E-05 |

|           |               |     |           |      |          |           |      |          |
|-----------|---------------|-----|-----------|------|----------|-----------|------|----------|
| AT4G06536 | chr4_3334822  | C/C | 0.34±0.07 | 0.09 | 3.68E-06 | 0.57±0.26 | 0.34 | 2.85E-02 |
| AT4G09012 | chr4_5784087  | G/G | 0.47±0.11 | 0.29 | 8.72E-06 | 3.63±0.86 | 0.44 | 2.47E-05 |
| AT4G09600 | chr4_6074156  | T/T | 6.75±1.31 | 0.2  | 2.67E-07 | 1.73±0.64 | 0.49 | 6.64E-03 |
| AT4G15053 | chr4_8598649  | T/T | 6.51±1.1  | 0.57 | 3.33E-09 | 5.89±1.02 | 0.31 | 8.31E-09 |
| AT4G22390 | chr4_11846652 | G/G | 0.24±0.03 | 0.06 | 3.33E-16 | 0.32±0.07 | 0.29 | 1.38E-06 |
| AT4G28790 | chr4_14357466 | A/A | 0.32±0.09 | 0.4  | 4.82E-04 | 3.56±1.79 | 0.25 | 4.62E-02 |
| AT5G03820 | chr5_1016604  | G/G | 0.24±0.03 | 0.2  | 1.06E-13 | 0.31±0.1  | 0.08 | 2.64E-03 |
| AT5G08460 | chr5_2734328  | T/T | 20±2.28   | 0.39 | 2.04E-18 | 6.24±0.93 | 0.29 | 1.62E-11 |
| AT5G14290 | chr5_5004746  | T/T | 1.65±0.58 | 0.34 | 4.34E-03 | 1.7±0.84  | 0.2  | 4.21E-02 |
| AT5G22555 | chr5_7487426  | A/A | 0.34±0.06 | 0.11 | 3.14E-09 | 0.38±0.09 | 0.28 | 1.33E-05 |
| AT5G22680 | chr5_7625326  | G/G | 0.52±0.15 | 0.24 | 5.32E-04 | 2.56±1.28 | 0.28 | 4.50E-02 |
| AT5G24040 | chr5_8150163  | C/C | 3.67±0.79 | 0.1  | 3.75E-06 | 9.03±1.34 | 0.08 | 1.74E-11 |
| AT5G24206 | chr5_8210609  | A/A | 4.59±0.9  | 0.59 | 3.04E-07 | 0.14±0.02 | 0.39 | 2.96E-09 |
| AT5G34830 | chr5_12151563 | G/G | 0.2±0.03  | 0.06 | 7.97E-13 | 2.26±0.79 | 0.16 | 4.03E-03 |
| AT5G36240 | chr5_14277903 | G/G | 3.33±0.89 | 0.56 | 1.83E-04 | 4.52±0.75 | 0.17 | 2.17E-09 |
| AT5G37280 | chr5_14761553 | T/T | 4.8±0.85  | 0.06 | 1.72E-08 | 3.66±0.96 | 0.38 | 1.32E-04 |
| AT5G38750 | chr5_15513299 | G/G | 0.39±0.08 | 0.11 | 2.57E-07 | 0.38±0.11 | 0.35 | 6.96E-04 |
| AT5G40050 | chr5_16033285 | C/C | 2.15±0.57 | 0.06 | 1.73E-04 | 2.12±0.69 | 0.07 | 1.99E-03 |
| AT5G41650 | chr5_16309822 | T/T | 0.3±0.08  | 0.06 | 1.31E-04 | 0.35±0.16 | 0.49 | 2.82E-02 |
| AT5G47130 | chr5_19140035 | T/T | 0.29±0.04 | 0.29 | 5.54E-14 | 0.51±0.2  | 0.29 | 9.35E-03 |
| AT5G48350 | chr5_19591922 | G/G | 3.79±0.72 | 0.08 | 1.23E-07 | 0.26±0.04 | 0.25 | 1.38E-12 |
| AT5G49420 | chr5_20036039 | G/G | 21.25±4.8 | 0.24 | 9.51E-06 | 0.4±0.13  | 0.35 | 2.81E-03 |
| AT5G54206 | chr5_21999241 | A/A | 0.23±0.03 | 0.32 | 2.06E-13 | 0.36±0.08 | 0.38 | 1.09E-05 |
| AT5G59340 | chr5_24032779 | A/A | 0.53±0.16 | 0.13 | 1.19E-03 | 2.03±0.79 | 0.21 | 9.83E-03 |
| AT5G60220 | chr5_24003551 | G/G | 0.53±0.15 | 0.09 | 6.16E-04 | 2±0.62    | 0.23 | 1.27E-03 |
| AT5G66970 | chr5_26741775 | C/C | 2.02±0.48 | 0.16 | 2.56E-05 | 2.65±0.83 | 0.21 | 1.43E-03 |
| AT5G67040 | chr5_26756966 | C/C | 0.53±0.24 | 0.11 | 2.80E-02 | 5.53±0.98 | 0.22 | 1.41E-08 |

<sup>a</sup>SNP: Overlapping SNP between the two datasets; <sup>b</sup>Genotype: Genotype at the coding allele from SCHMITZ data; <sup>c</sup>log odds ratio ±SE: log odds ratio ±

Standard Error from the logistic regression; <sup>d</sup>MAF: Minor Allele Frequency; <sup>e</sup>P-value: nominal P-value from single-SNP association

**Table S4: 2,320 eQTL regulating the expression of 2,240 genes expressed in most of the 140 wild-collected *A. thaliana* accessions**

| <i>Locus</i> | <i>a</i> SNP  | <i>b</i> Type | <i>c</i> a±SE | <i>d</i> P-value | <i>e</i> MAF | <i>Annotation</i>                                                                              |
|--------------|---------------|---------------|---------------|------------------|--------------|------------------------------------------------------------------------------------------------|
| AT1G80555    | chr1_30287050 | cis           | -0,83±0,09    | 4,05E-19         | 0,36         | Isocitrate/isopropylmalate-dehydrogenase-family-protein                                        |
| AT5G28350    | chr5_10323384 | cis           | -0,83±0,09    | 6,45E-19         | 0,61         | Quinoprotein-amine-dehydrogenase,-beta-chain-like;-RIC1-like-guanyl-nucleotide-exchange-factor |
| AT3G11220    | chr3_3513881  | cis           | 0,78±0,09     | 1,11E-18         | 0,46         | Paxneb-protein-related                                                                         |
| AT5G44570    | chr5_17962791 | cis           | -0,75±0,08    | 1,48E-18         | 0,37         |                                                                                                |
| AT3G43210    | chr3_15190921 | cis           | 0,77±0,09     | 3,02E-18         | 0,36         | ATP-binding-microtubule-motor-family-protein                                                   |
| AT3G57460    | chr3_21268732 | cis           | -0,84±0,1     | 3,39E-18         | 0,28         | catalytics;metal-ion-binding                                                                   |
| AT3G61020    | chr3_22577967 | cis           | 0,75±0,09     | 3,67E-18         | 0,48         |                                                                                                |
| AT3G55170    | chr3_20446391 | cis           | -0,77±0,09    | 7,02E-18         | 0,34         | Ribosomal-L29-family-protein-                                                                  |
| AT5G38260    | chr5_15284589 | cis           | -0,79±0,09    | 7,25E-18         | 0,29         | Protein-kinase-superfamily-protein                                                             |
| AT3G27997    | chr3_10406021 | cis           | 0,77±0,09     | 1,10E-17         | 0,41         |                                                                                                |
| AT5G37530    | chr5_14906626 | cis           | -0,76±0,09    | 1,11E-17         | 0,34         | NAD(P)-binding-Rossmann-fold-superfamily-protein                                               |
| AT4G17180    | chr4_9645974  | cis           | 0,82±0,1      | 1,17E-17         | 0,26         | O-Glycosyl-hydrolases-family-17-protein                                                        |
| AT4G28220    | chr4_13995497 | cis           | 0,75±0,09     | 1,24E-17         | 0,41         | NAD(P)H-dehydrogenase-B1                                                                       |
| AT1G31580    | chr1_11313660 | cis           | -0,73±0,09    | 1,28E-17         | 0,52         | ECS1                                                                                           |
| AT4G17240    | chr4_9668653  | cis           | 0,74±0,09     | 1,77E-17         | 0,47         |                                                                                                |
| AT1G64270    | chr1_23852426 | cis           | -0,86±0,1     | 1,97E-17         | 0,25         | transposable-element-gene                                                                      |
| AT2G38780    | chr2_16206381 | cis           | 0,8±0,09      | 3,19E-17         | 0,29         |                                                                                                |
| AT4G14590    | chr4_8374711  | cis           | -0,73±0,09    | 4,30E-17         | 0,39         | embryo-defective-2739                                                                          |
| AT1G12790    | chr1_4361386  | cis           | -0,74±0,09    | 4,91E-17         | 0,39         |                                                                                                |
| AT3G46710    | chr3_17212160 | cis           | 0,75±0,09     | 5,10E-17         | 0,39         | NB-ARC-domain-containing-disease-resistance-protein                                            |
| AT5G27110    | chr5_9540150  | cis           | 0,74±0,09     | 6,91E-17         | 0,36         | Tetratricopeptide-repeat-(TPR)-like-superfamily-protein                                        |
| AT2G39110    | chr2_16319245 | cis           | -0,85±0,1     | 7,48E-17         | 0,27         | Protein-kinase-superfamily-protein                                                             |
| AT2G21640    | chr2_9249267  | cis           | 0,72±0,09     | 8,01E-17         | 0,45         |                                                                                                |
| AT2G44690    | chr2_18428322 | cis           | 0,72±0,09     | 1,09E-16         | 0,42         | Arabidopsis-RAC-like-9                                                                         |
| AT2G28460    | chr2_12166333 | cis           | -0,71±0,09    | 1,20E-16         | 0,50         | Cysteine/Histidine-rich-C1-domain-family-protein                                               |
| AT4G21460    | chr4_11429464 | cis           | 0,79±0,1      | 1,24E-16         | 0,27         | Ribosomal-protein-S24/S35,-mitochondrial                                                       |
| AT5G36930    | chr5_14590245 | cis           | 0,88±0,11     | 1,32E-16         | 0,22         | Disease-resistance-protein-(TIR-NBS-LRR-class)-family                                          |
| AT3G54366    | chr3_20133288 | cis           | 0,77±0,09     | 1,84E-16         | 0,53         |                                                                                                |
| AT1G49630    | chr1_18368655 | cis           | 0,74±0,09     | 2,64E-16         | 0,47         | presequence-protease-2                                                                         |
| AT3G46658    | chr3_17189218 | cis           | -0,76±0,09    | 2,68E-16         | 0,31         | other-RNA                                                                                      |
| AT3G44280    | chr3_15968886 | cis           | -0,79±0,1     | 3,03E-16         | 0,29         |                                                                                                |
| AT1G13780    | chr1_4725940  | cis           | 0,8±0,1       | 3,04E-16         | 0,30         | F-box/RNI-like/FBD-like-domains-containing-protein                                             |

|           |               |       |            |          |      |                                                                                 |
|-----------|---------------|-------|------------|----------|------|---------------------------------------------------------------------------------|
| AT2G19400 | chr2_8403801  | cis   | -0,71±0,09 | 3,07E-16 | 0,44 | AGC-(cAMP-dependent,-cGMP-dependent-and-protein-kinase-C)-kinase-family-protein |
| AT5G51470 | chr5_20906654 | cis   | 0,73±0,09  | 3,18E-16 | 0,34 | Auxin-responsive-GH3-family-protein                                             |
| AT3G59600 | chr3_22018007 | cis   | -0,75±0,09 | 3,60E-16 | 0,32 | RNA-polymerase-Rpb8                                                             |
| AT4G22960 | chr4_12033401 | cis   | 0,81±0,1   | 3,86E-16 | 0,30 | Protein-of-unknown-function-(DUF544)-----                                       |
| AT5G45428 | chr5_18408354 | cis   | -0,72±0,09 | 4,06E-16 | 0,46 | conserved-peptide-upstream-open-reading-frame-24                                |
| AT4G37170 | chr4_17502758 | cis   | 0,72±0,09  | 4,53E-16 | 0,31 | Pentatricopeptide-repeat-(PPR)-superfamily-protein                              |
| AT3G21100 | chr3_7401258  | cis   | 0,76±0,09  | 5,18E-16 | 0,29 | RNA-binding-(RRM/RBD/RNP-motifs)-family-protein                                 |
| AT4G18750 | chr4_10304955 | cis   | 0,71±0,09  | 5,24E-16 | 0,46 | Pentatricopeptide-repeat-(PPR)-superfamily-protein                              |
| AT1G66930 | chr1_24960780 | cis   | 0,71±0,09  | 5,30E-16 | 0,51 | Protein-kinase-superfamily-protein                                              |
| AT1G30420 | chr1_10748282 | cis   | -0,72±0,09 | 6,06E-16 | 0,42 | multidrug-resistance-associated-protein-12                                      |
| AT1G73940 | chr1_27798005 | cis   | 0,75±0,09  | 6,25E-16 | 0,29 |                                                                                 |
| AT5G45480 | chr5_18427115 | cis   | 0,73±0,09  | 6,57E-16 | 0,41 | Protein-of-unknown-function-(DUF594)                                            |
| AT4G16710 | chr4_9397913  | cis   | 0,72±0,09  | 7,87E-16 | 0,33 | glycosyltransferase-family-protein-28                                           |
| AT3G07525 | chr3_2398863  | cis   | -0,68±0,08 | 8,25E-16 | 0,51 | autophagocytosis-associated-family-protein                                      |
| AT3G08980 | chr3_2740857  | cis   | 0,79±0,1   | 8,88E-16 | 0,29 | Peptidase-S24/S26A/S26B/S26C-family-protein                                     |
| AT1G22440 | chr1_7922907  | cis   | 0,7±0,09   | 1,12E-15 | 0,46 | Zinc-binding-alcohol-dehydrogenase-family-protein                               |
| AT2G23672 | chr2_10063693 | cis   | 0,72±0,09  | 1,13E-15 | 0,39 | other-RNA                                                                       |
| AT2G13665 | chr3_11216048 | trans | 0,71±0,09  | 1,24E-15 | 0,45 | other-RNA                                                                       |
| AT2G01870 | chr2_389440   | cis   | -0,73±0,09 | 1,45E-15 | 0,37 |                                                                                 |
| AT2G05755 | chr2_2171352  | cis   | 0,72±0,09  | 1,48E-15 | 0,33 | Nodulin-MtN21-/EamA-like-transporter-family-protein                             |
| AT5G08120 | chr5_2596249  | cis   | 0,71±0,09  | 1,60E-15 | 0,49 | movement-protein-binding-protein-2C                                             |
| AT1G48740 | chr1_18025758 | cis   | -0,67±0,08 | 1,63E-15 | 0,46 | 2-oxoglutarate-(2OG)-and-Fe(II)-dependent-oxygenase-superfamily-protein         |
| AT4G27370 | chr4_13697729 | cis   | -0,7±0,09  | 1,65E-15 | 0,36 | P-loop-containing-nucleoside-triphosphate-hydrolases-superfamily-protein        |
| AT1G67365 | chr1_25237465 | cis   | -0,82±0,1  | 1,82E-15 | 0,24 | other-RNA                                                                       |
| AT5G21060 | chr5_7150004  | cis   | -0,82±0,1  | 1,86E-15 | 0,24 | Glyceraldehyde-3-phosphate-dehydrogenase-like-family-protein                    |
| AT4G19830 | chr4_10773603 | cis   | -0,69±0,09 | 1,86E-15 | 0,37 | FKBP-like-peptidyl-prolyl-cis-trans-isomerase-family-protein                    |
| AT2G04170 | chr2_1422823  | cis   | 0,75±0,09  | 1,92E-15 | 0,34 | TRAF-like-family-protein                                                        |
| AT5G45510 | chr5_18425889 | cis   | 0,77±0,1   | 1,93E-15 | 0,31 | Leucine-rich-repeat-(LRR)-family-protein                                        |
| AT2G16530 | chr2_7161753  | cis   | -0,8±0,1   | 1,97E-15 | 0,31 | 3-oxo-5-alpha-steroid-4-dehydrogenase-family-protein                            |
| AT2G30480 | chr2_12982265 | cis   | -0,84±0,11 | 2,02E-15 | 0,24 |                                                                                 |
| AT1G12340 | chr1_4220424  | cis   | 0,77±0,1   | 2,04E-15 | 0,32 | Cornichon-family-protein                                                        |
| AT2G35810 | chr2_15044781 | cis   | -0,75±0,09 | 2,10E-15 | 0,34 |                                                                                 |
| AT4G21900 | chr4_11614996 | cis   | 0,76±0,1   | 2,26E-15 | 0,33 | proteinaceous-RNase-P-3                                                         |
| AT3G12040 | chr3_3837428  | cis   | -0,74±0,09 | 2,41E-15 | 0,39 | DNA-3-methyladenine-glycosylase-(MAG)                                           |

|           |               |       |            |          |      |                                                                          |
|-----------|---------------|-------|------------|----------|------|--------------------------------------------------------------------------|
| AT3G29290 | chr3_11238348 | cis   | -0,81±0,1  | 2,42E-15 | 0,25 | Pentatricopeptide-repeat-(PPR)-superfamily-protein                       |
| AT2G40240 | chr2_16810960 | cis   | -0,77±0,1  | 2,75E-15 | 0,28 | Tetratricopeptide-repeat-(TPR)-like-superfamily-protein                  |
| AT1G03905 | chr1_993375   | cis   | 0,79±0,1   | 2,87E-15 | 0,26 | P-loop-containing-nucleoside-triphosphate-hydrolases-superfamily-protein |
| AT4G09680 | chr4_6119455  | cis   | 0,71±0,09  | 2,95E-15 | 0,37 | conserved-telomere-maintenance-component-1                               |
| AT5G37410 | chr5_14835977 | cis   | -0,72±0,09 | 3,00E-15 | 0,29 | Family-of-unknown-function-(DUF577)                                      |
| AT1G63210 | chr1_23443274 | cis   | 0,74±0,09  | 3,19E-15 | 0,32 | Transcription-elongation-factor-Spt6                                     |
| AT3G44100 | chr3_15866682 | cis   | -0,69±0,09 | 3,22E-15 | 0,50 | MD-2-related-lipid-recognition-domain-containing-protein                 |
| AT5G42460 | chr5_16978784 | cis   | -0,82±0,1  | 3,47E-15 | 0,22 | F-box-and-associated-interaction-domains-containing-protein              |
| AT1G11320 | chr1_3808391  | cis   | -0,69±0,09 | 3,65E-15 | 0,52 |                                                                          |
| AT1G11800 | chr1_3987293  | cis   | -0,79±0,1  | 3,74E-15 | 0,26 | endonuclease/exonuclease/phosphatase-family-protein                      |
| AT3G09680 | chr5_695868   | trans | 0,74±0,09  | 3,92E-15 | 0,38 | Ribosomal-protein-S12/S23-family-protein                                 |
| AT5G28390 | chr5_10348548 | cis   | 0,89±0,11  | 4,03E-15 | 0,18 | RNA-binding-(RRM/RBD/RNP-motifs)-family-protein                          |
| AT2G22905 | chr2_9748570  | cis   | 0,67±0,09  | 4,06E-15 | 0,51 | Expressed-protein                                                        |
| AT4G39660 | chr4_18406370 | cis   | 0,83±0,11  | 4,38E-15 | 0,23 | alanine:glyoxylate-aminotransferase-2                                    |
| AT2G18100 | chr2_7868173  | cis   | -0,7±0,09  | 4,42E-15 | 0,51 | Protein-of-unknown-function-(DUF726)                                     |
| AT4G16990 | chr4_9568061  | cis   | -0,87±0,11 | 4,55E-15 | 0,17 | disease-resistance-protein-(TIR-NBS-class),-putative                     |
| AT4G36650 | chr4_17286479 | cis   | 0,69±0,09  | 4,57E-15 | 0,46 | plant-specific-TFIIB-related-protein                                     |
| AT5G50350 | chr5_20499378 | cis   | -0,74±0,09 | 5,12E-15 | 0,33 |                                                                          |
| AT5G17060 | chr5_5610876  | cis   | -0,78±0,1  | 5,21E-15 | 0,24 | ADP-ribosylation-factor-B1B                                              |
| AT5G43660 | chr5_17538051 | cis   | 0,68±0,09  | 5,30E-15 | 0,41 | 2-oxoglutarate-(2OG)-and-Fe(II)-dependent-oxygenase-superfamily-protein  |
| AT3G43430 | chr3_15355282 | cis   | 0,71±0,09  | 5,40E-15 | 0,34 | RING/U-box-superfamily-protein                                           |
| AT5G23235 | chr5_7826249  | cis   | -0,67±0,09 | 5,55E-15 | 0,41 |                                                                          |
| AT3G47290 | chr3_17392402 | cis   | 0,7±0,09   | 5,63E-15 | 0,46 | phosphatidylinositol-speciwc-phospholipase-C8                            |
| AT1G58270 | chr1_21607764 | cis   | 0,71±0,09  | 5,64E-15 | 0,35 | TRAF-like-family-protein                                                 |
| AT1G45616 | chr1_17186607 | cis   | 0,7±0,09   | 5,73E-15 | 0,57 | receptor-like-protein-6                                                  |
| AT4G19520 | chr4_10655911 | cis   | -0,67±0,09 | 5,87E-15 | 0,44 | disease-resistance-protein-(TIR-NBS-LRR-class)-family                    |
| AT2G14285 | chr2_6054717  | cis   | -0,7±0,09  | 5,88E-15 | 0,46 | Small-nuclear-ribonucleoprotein-family-protein                           |
| AT4G00980 | chr4_421194   | cis   | 0,81±0,1   | 5,90E-15 | 0,33 | zinc-knuckle-(CCHC-type)-family-protein                                  |
| AT4G03635 | chr4_1610306  | cis   | 0,81±0,1   | 6,09E-15 | 0,27 |                                                                          |
| AT4G03635 | chr4_2782400  | trans | 0,81±0,1   | 6,09E-15 | 0,27 |                                                                          |
| AT3G27883 | chr3_10969380 | trans | -0,89±0,11 | 6,59E-15 | 0,16 | transposable-element-gene                                                |
| AT3G20130 | chr3_7026006  | cis   | 0,76±0,1   | 6,93E-15 | 0,30 | cytochrome-P450,-family-705,-subfamily-A,-polypeptide-22                 |
| AT1G33990 | chr1_12356041 | cis   | 0,71±0,09  | 7,10E-15 | 0,36 | methyl-esterase-14                                                       |
| AT4G11630 | chr4_7023030  | cis   | 0,7±0,09   | 7,56E-15 | 0,31 | Ribosomal-protein-L19-family-protein                                     |



|           |               |       |            |          |      |                                                                                                |
|-----------|---------------|-------|------------|----------|------|------------------------------------------------------------------------------------------------|
| AT1G23470 | chr1_8330782  | cis   | 0,68±0,09  | 7,92E-15 | 0,51 |                                                                                                |
| AT5G66960 | chr5_26739679 | cis   | 0,7±0,09   | 8,96E-15 | 0,51 | Prolyl-oligopeptidase-family-protein                                                           |
| AT1G19396 | chr1_6703658  | cis   | -0,77±0,1  | 8,97E-15 | 0,31 |                                                                                                |
| AT1G57590 | chr1_21330272 | cis   | -0,68±0,09 | 9,15E-15 | 0,36 | Pectinacetylsterase-family-protein                                                             |
| AT1G23940 | chr1_8441984  | cis   | 0,68±0,09  | 9,18E-15 | 0,55 | ARM-repeat-superfamily-protein                                                                 |
| AT5G25230 | chr5_8742785  | cis   | 0,81±0,1   | 9,34E-15 | 0,25 | Ribosomal-protein-S5/Elongation-factor-G/III/V-family-protein                                  |
| AT5G45040 | chr5_18174178 | cis   | -0,71±0,09 | 1,07E-14 | 0,40 | Cytochrome-c                                                                                   |
| AT1G23960 | chr1_8481111  | cis   | 0,69±0,09  | 1,08E-14 | 0,36 | Protein-of-unknown-function-(DUF626)                                                           |
| AT3G45860 | chr3_16867335 | cis   | -0,75±0,1  | 1,13E-14 | 0,29 | cysteine-rich-RLK-(RECEPTOR-like-protein-kinase)-4                                             |
| AT5G15760 | chr5_5142587  | cis   | -0,7±0,09  | 1,20E-14 | 0,59 | Ribosomal-protein-PSRP-3/Ycf65                                                                 |
| AT4G01915 | chr4_833857   | cis   | 0,72±0,09  | 1,22E-14 | 0,34 |                                                                                                |
| AT1G04090 | chr1_1056228  | cis   | 0,7±0,09   | 1,44E-14 | 0,32 | Plant-protein-of-unknown-function-(DUF946)                                                     |
| AT4G19500 | chr4_10619181 | cis   | 0,8±0,1    | 1,50E-14 | 0,22 | nucleoside-triphosphatases;transmembrane-receptors;nucleotide-binding;ATP-binding              |
| AT1G23140 | chr1_8202964  | cis   | -0,74±0,1  | 1,53E-14 | 0,29 | Calcium-dependent-lipid-binding-(CaLB-domain)-family-protein                                   |
| AT4G19510 | chr4_10622367 | cis   | 0,67±0,09  | 1,59E-14 | 0,56 | Disease-resistance-protein-(TIR-NBS-LRR-class)                                                 |
| AT3G30875 | chr3_12655676 | cis   | 0,71±0,09  | 1,72E-14 | 0,46 |                                                                                                |
| AT5G54290 | chr5_22054713 | cis   | -0,72±0,09 | 1,73E-14 | 0,31 | cytochrome-c-biogenesis-protein-family                                                         |
| AT4G16800 | chr4_9455662  | cis   | 0,69±0,09  | 1,76E-14 | 0,34 | ATP-dependent-caseinolytic-(Clp)-protease/crotonase-family-protein                             |
| AT1G65540 | chr1_24365326 | cis   | 0,69±0,09  | 1,86E-14 | 0,37 | LETM1-like-protein                                                                             |
| AT5G10400 | chr5_3272353  | cis   | -0,81±0,11 | 1,88E-14 | 0,26 | Histone-superfamily-protein                                                                    |
| AT5G45730 | chr5_18552017 | cis   | 0,76±0,1   | 1,90E-14 | 0,24 | Cysteine/Histidine-rich-C1-domain-family-protein                                               |
| AT3G61480 | chr5_10323384 | trans | -0,71±0,09 | 1,98E-14 | 0,61 | Quinoprotein-amine-dehydrogenase,-beta-chain-like;-RIC1-like-guanyl-nucleotide-exchange-factor |
| AT1G02050 | chr1_360888   | cis   | -0,75±0,1  | 2,03E-14 | 0,29 | Chalcone-and-stilbene-synthase-family-protein                                                  |
| AT5G42930 | chr5_17213357 | cis   | 0,69±0,09  | 2,04E-14 | 0,35 | alpha/beta-Hydrolases-superfamily-protein                                                      |
| AT5G42730 | chr5_7888582  | trans | 0,72±0,09  | 2,07E-14 | 0,39 |                                                                                                |
| AT4G27585 | chr4_13770278 | cis   | 0,66±0,09  | 2,11E-14 | 0,50 | SPFH/Band-7/PHB-domain-containing-membrane-associated-protein-family                           |
| AT1G35112 | chr5_18407914 | trans | 0,78±0,1   | 2,28E-14 | 0,20 | transposable-element-gene                                                                      |
| AT5G27230 | chr5_9589751  | cis   | 0,7±0,09   | 2,36E-14 | 0,30 | Frigida-like-protein                                                                           |
| AT5G41580 | chr5_16635453 | cis   | 0,66±0,09  | 2,47E-14 | 0,49 | RING/U-box-superfamily-protein                                                                 |
| AT3G44430 | chr3_16071143 | cis   | 0,71±0,09  | 2,55E-14 | 0,32 |                                                                                                |
| AT5G44582 | chr5_17980151 | cis   | 0,71±0,09  | 2,55E-14 | 0,29 |                                                                                                |
| AT5G17900 | chr5_5907963  | cis   | -0,66±0,09 | 2,79E-14 | 0,51 | microfibrillar-associated-protein-related                                                      |
| AT1G02300 | chr1_449560   | cis   | -0,82±0,11 | 2,81E-14 | 0,24 | Cysteine-proteinases-superfamily-protein                                                       |
| AT1G77960 | chr1_29313634 | cis   | 0,67±0,09  | 2,97E-14 | 0,41 |                                                                                                |

|           |               |       |            |          |      |                                                                   |
|-----------|---------------|-------|------------|----------|------|-------------------------------------------------------------------|
| AT5G35930 | chr5_14074359 | cis   | -0,66±0,09 | 3,41E-14 | 0,51 | AMP-dependent-synthetase-and-ligase-family-protein                |
| AT5G44870 | chr5_18135644 | cis   | -0,91±0,12 | 3,45E-14 | 0,16 | Disease-resistance-protein-(TIR-NBS-LRR-class)-family             |
| AT4G13920 | chr4_8043290  | cis   | -0,71±0,09 | 3,54E-14 | 0,29 | receptor-like-protein-50                                          |
| AT5G20580 | chr5_6963670  | cis   | 0,79±0,1   | 3,55E-14 | 0,50 |                                                                   |
| AT1G55000 | chr1_20513401 | cis   | -0,81±0,11 | 3,65E-14 | 0,21 | peptidoglycan-binding-LysM-domain-containing-protein              |
| AT5G28442 | chr5_10322650 | cis   | 0,7±0,09   | 4,07E-14 | 0,36 |                                                                   |
| AT5G28340 | chr5_10348548 | cis   | 0,83±0,11  | 4,40E-14 | 0,18 | Tetratricopeptide-repeat-(TPR)-like-superfamily-protein           |
| AT5G41260 | chr5_16503811 | cis   | -0,8±0,11  | 4,52E-14 | 0,20 | Protein-kinase-protein-with-tetratricopeptide-repeat-domain       |
| AT4G11000 | chr4_6731977  | cis   | 0,74±0,1   | 4,53E-14 | 0,25 | Ankyrin-repeat-family-protein                                     |
| AT5G11580 | chr5_3721190  | cis   | -0,87±0,12 | 4,61E-14 | 0,18 | Regulator-of-chromosome-condensation-(RCC1)-family-protein        |
| AT5G28330 | chr5_10348548 | cis   | 0,84±0,11  | 4,62E-14 | 0,18 |                                                                   |
| AT3G28715 | chr3_10773240 | cis   | 0,8±0,11   | 4,75E-14 | 0,20 | ATPase,-V0/A0-complex,-subunit-C/D                                |
| AT3G02700 | chr3_582610   | cis   | 0,76±0,1   | 5,43E-14 | 0,24 | NC-domain-containing-protein-related                              |
| AT1G49980 | chr1_18507818 | cis   | -0,69±0,09 | 5,59E-14 | 0,35 | DNA/RNA-polymerases-superfamily-protein                           |
| AT1G04590 | chr1_1259655  | cis   | 0,66±0,09  | 5,89E-14 | 0,43 |                                                                   |
| AT5G23410 | chr5_7888582  | cis   | 0,7±0,09   | 6,48E-14 | 0,39 |                                                                   |
| AT4G26170 | chr4_13258607 | cis   | 0,72±0,1   | 6,59E-14 | 0,27 |                                                                   |
| AT4G21480 | chr4_11434031 | cis   | -0,66±0,09 | 6,60E-14 | 0,39 | sugar-transporter-protein-12                                      |
| AT5G27210 | chr5_9575184  | cis   | -0,75±0,1  | 6,65E-14 | 0,24 | Protein-of-unknown-function,-transmembrane-40                     |
| AT5G41950 | chr5_16783931 | cis   | -0,93±0,12 | 6,71E-14 | 0,16 | Tetratricopeptide-repeat-(TPR)-like-superfamily-protein           |
| AT3G52950 | chr3_19634392 | cis   | 0,66±0,09  | 7,21E-14 | 0,44 | CBS-/-octicosapeptide/Phox/Bemp1-(PB1)-domains-containing-protein |
| AT5G05230 | chr5_1551994  | cis   | -0,73±0,1  | 7,46E-14 | 0,31 | RING/U-box-superfamily-protein                                    |
| AT1G35560 | chr1_13116559 | cis   | 0,68±0,09  | 7,48E-14 | 0,31 | TCP-family-transcription-factor-                                  |
| AT5G49970 | chr5_20333567 | cis   | -0,81±0,11 | 7,55E-14 | 0,22 | pyridoxin-(pyridoxamine)-5'-phosphate-oxidase                     |
| AT5G02740 | chr5_616527   | cis   | -0,65±0,09 | 7,82E-14 | 0,43 | Ribosomal-protein-S24e-family-protein                             |
| AT4G14400 | chr4_8297587  | cis   | -0,67±0,09 | 7,82E-14 | 0,33 | ankyrin-repeat-family-protein                                     |
| AT4G14030 | chr4_8098226  | cis   | -0,71±0,09 | 7,95E-14 | 0,33 | selenium-binding-protein-1                                        |
| AT5G41850 | chr5_16757604 | cis   | -0,64±0,09 | 8,16E-14 | 0,41 | alpha/beta-Hydrolases-superfamily-protein                         |
| AT3G44740 | chr3_16298344 | cis   | 0,82±0,11  | 8,21E-14 | 0,19 | Class-II-aaRS-and-biotin-synthetases-superfamily-protein          |
| AT5G33400 | chr5_12360116 | trans | 0,76±0,1   | 8,56E-14 | 0,44 |                                                                   |
| AT5G03420 | chr5_845287   | cis   | -0,7±0,09  | 8,64E-14 | 0,31 | 5'-AMP-activated-protein-kinase-related                           |
| AT4G20920 | chr4_11201042 | cis   | 0,75±0,1   | 8,82E-14 | 0,25 | double-stranded-RNA-binding-domain-(DsRBD)-containing-protein     |
| AT1G31910 | chr1_11458878 | cis   | 0,61±0,08  | 8,83E-14 | 0,49 | GHMP-kinase-family-protein                                        |
| AT1G19485 | chr1_6744457  | cis   | 0,81±0,11  | 1,10E-13 | 0,29 | Transducin/WD40-repeat-like-superfamily-protein                   |

|           |               |     |            |          |      |                                                                                                                                                                                                                                                |
|-----------|---------------|-----|------------|----------|------|------------------------------------------------------------------------------------------------------------------------------------------------------------------------------------------------------------------------------------------------|
| AT2G41460 | chr2_17288582 | cis | -0,8±0,11  | 1,14E-13 | 0,20 | apurinic-endonuclease-redox-protein                                                                                                                                                                                                            |
| AT3G25440 | chr3_9224929  | cis | 0,76±0,1   | 1,20E-13 | 0,31 | RNA-binding-CRS1-/-YhbY-(CRM)-domain-protein                                                                                                                                                                                                   |
| AT1G69485 | chr1_26119245 | cis | -0,72±0,1  | 1,25E-13 | 0,29 | Ribosomal-L32p-protein-family                                                                                                                                                                                                                  |
| AT3G22850 | chr3_8087828  | cis | -0,92±0,12 | 1,36E-13 | 0,19 | Aluminium-induced-protein-with-YGL-and-LRDR-motifs                                                                                                                                                                                             |
| AT5G45490 | chr5_18425889 | cis | 0,7±0,09   | 1,37E-13 | 0,31 | P-loop-containing-nucleoside-triphosphate-hydrolases-superfamily-protein                                                                                                                                                                       |
| AT5G45500 | chr5_18425889 | cis | 0,7±0,09   | 1,37E-13 | 0,31 | RNI-like-superfamily-protein                                                                                                                                                                                                                   |
| AT3G47300 | chr3_17437885 | cis | 0,69±0,09  | 1,38E-13 | 0,32 | SELT-like-protein-precursor                                                                                                                                                                                                                    |
| AT4G15330 | chr4_8753954  | cis | -0,78±0,11 | 1,39E-13 | 0,23 | cytochrome-P450,-family-705,-subfamily-A,-polypeptide-1                                                                                                                                                                                        |
| AT1G61980 | chr1_22909598 | cis | 0,84±0,11  | 1,40E-13 | 0,16 | Mitochondrial-transcription-termination-factor-family-protein                                                                                                                                                                                  |
| AT5G58980 | chr5_23812400 | cis | 0,74±0,1   | 1,48E-13 | 0,25 | Neutral/alkaline-non-lysosomal-ceramidase                                                                                                                                                                                                      |
| AT3G60980 | chr3_22577967 | cis | 0,61±0,08  | 1,52E-13 | 0,48 | Tetratricopeptide-repeat-(TPR)-like-superfamily-protein                                                                                                                                                                                        |
| AT5G20450 | chr5_6919465  | cis | 0,64±0,09  | 1,53E-13 | 0,39 |                                                                                                                                                                                                                                                |
| AT4G31530 | chr4_15284066 | cis | -0,69±0,09 | 1,54E-13 | 0,34 | NAD(P)-binding-Rossmann-fold-superfamily-protein                                                                                                                                                                                               |
| AT4G21760 | chr4_11561162 | cis | 0,65±0,09  | 1,56E-13 | 0,50 | beta-glucosidase-47                                                                                                                                                                                                                            |
| AT2G27960 | chr2_11910888 | cis | -0,81±0,11 | 1,62E-13 | 0,22 | cyclin-dependent-kinase-subunit-1                                                                                                                                                                                                              |
| AT5G45050 | chr5_18187250 | cis | 0,8±0,11   | 1,62E-13 | 0,22 | Disease-resistance-protein-(TIR-NBS-LRR-class)                                                                                                                                                                                                 |
| AT2G15042 | chr2_6508008  | cis | -0,75±0,1  | 1,71E-13 | 0,27 | Leucine-rich-repeat-(LRR)-family-protein                                                                                                                                                                                                       |
| AT2G47210 | chr2_19378842 | cis | 0,69±0,09  | 1,71E-13 | 0,38 | myb-like-transcription-factor-family-protein                                                                                                                                                                                                   |
| AT2G25580 | chr2_10887602 | cis | -0,71±0,1  | 1,74E-13 | 0,45 | Tetratricopeptide-repeat-(TPR)-like-superfamily-protein                                                                                                                                                                                        |
| AT5G28320 | chr5_10348548 | cis | 0,83±0,11  | 1,83E-13 | 0,18 |                                                                                                                                                                                                                                                |
| AT5G16220 | chr5_5301375  | cis | -0,66±0,09 | 1,85E-13 | 0,44 | Octicosapeptide/Phox/Bem1p-family-protein                                                                                                                                                                                                      |
| AT1G19070 | chr1_6584025  | cis | -0,67±0,09 | 1,89E-13 | 0,31 | F-box-family-protein                                                                                                                                                                                                                           |
| AT4G03060 | chr4_1341870  | cis | -0,68±0,09 | 2,07E-13 | 0,26 | <small>AOP2-(ALKENYL-HYDROXALKYL-PRODUCING-2)-oxidoreductase,-acting-on-paired-donors,-with-incorporation-or-reduction-of-molecular-oxygen,-2-oxoglutarate-as-one-donor,-and-incorporation-of-one-atom-each-of-oxygen-into-both-donors</small> |
| AT3G06145 | chr3_1861208  | cis | 0,66±0,09  | 2,07E-13 | 0,39 |                                                                                                                                                                                                                                                |
| AT5G25640 | chr5_8968191  | cis | 0,76±0,1   | 2,19E-13 | 0,21 | Rhomboid-related-intramembrane-serine-protease-family-protein                                                                                                                                                                                  |
| AT5G28400 | chr5_10348548 | cis | 0,82±0,11  | 2,25E-13 | 0,18 |                                                                                                                                                                                                                                                |
| AT1G25260 | chr1_8855262  | cis | 0,65±0,09  | 2,25E-13 | 0,44 | Ribosomal-protein-L10-family-protein                                                                                                                                                                                                           |
| AT1G09995 | chr1_3257815  | cis | -0,74±0,1  | 2,27E-13 | 0,30 | DNA-repair-DEAD-helicase-RAD3/XP-D-subfamily-protein                                                                                                                                                                                           |
| AT4G21880 | chr4_11607385 | cis | 0,73±0,1   | 2,37E-13 | 0,26 | Pentatricopeptide-repeat-(PPR)-superfamily-protein                                                                                                                                                                                             |
| AT5G42920 | chr5_17206718 | cis | 0,67±0,09  | 2,38E-13 | 0,29 | THO-complex,-subunit-5                                                                                                                                                                                                                         |
| AT2G02590 | chr2_702791   | cis | 0,7±0,1    | 2,38E-13 | 0,27 |                                                                                                                                                                                                                                                |
| AT1G14700 | chr1_5057590  | cis | -0,79±0,11 | 2,41E-13 | 0,26 | purple-acid-phosphatase-3                                                                                                                                                                                                                      |
| AT5G45720 | chr5_18549293 | cis | 0,73±0,1   | 2,43E-13 | 0,27 | AAA-type-ATPase-family-protein                                                                                                                                                                                                                 |
| AT1G27560 | chr1_9566485  | cis | -0,6±0,08  | 2,69E-13 | 0,40 |                                                                                                                                                                                                                                                |

|           |               |       |            |          |      |                                                                          |
|-----------|---------------|-------|------------|----------|------|--------------------------------------------------------------------------|
| AT5G45130 | chr5_18245912 | cis   | 0,69±0,09  | 2,69E-13 | 0,32 | RAB-homolog-1                                                            |
| AT5G43940 | chr5_17684842 | cis   | -0,62±0,08 | 2,73E-13 | 0,51 | GroES-like-zinc-binding-dehydrogenase-family-protein                     |
| AT3G21080 | chr3_7384837  | cis   | -0,77±0,1  | 2,74E-13 | 0,23 | ABC-transporter-related                                                  |
| AT4G01270 | chr4_531859   | cis   | 0,88±0,12  | 2,74E-13 | 0,17 | RING/U-box-superfamily-protein                                           |
| AT4G03230 | chr4_1424372  | cis   | 0,63±0,09  | 2,85E-13 | 0,47 | S-locus-lectin-protein-kinase-family-protein                             |
| AT5G25910 | chr5_9037698  | cis   | 0,77±0,1   | 2,87E-13 | 0,21 | receptor-like-protein-52                                                 |
| AT1G09830 | chr1_3192604  | cis   | 0,64±0,09  | 2,92E-13 | 0,45 | Glycinamide-ribonucleotide-(GAR)-synthetase                              |
| AT5G41910 | chr5_16779280 | cis   | -0,62±0,09 | 3,00E-13 | 0,48 | Mediator-complex,-subunit-Med10                                          |
| AT2G24690 | chr2_10499307 | cis   | -0,72±0,1  | 3,04E-13 | 0,29 | Transcriptional-factor-B3-family-protein                                 |
| AT1G63855 | chr1_23699933 | cis   | -0,78±0,11 | 3,09E-13 | 0,20 | Putative-methyltransferase-family-protein                                |
| AT5G33400 | chr5_13020995 | trans | 0,75±0,1   | 3,11E-13 | 0,44 |                                                                          |
| AT1G03410 | chr1_821772   | cis   | 0,69±0,1   | 3,12E-13 | 0,34 | 2-oxoglutarate-(2OG)-and-Fe(II)-dependent-oxygenase-superfamily-protein  |
| AT3G49180 | chr3_18229388 | cis   | -0,64±0,09 | 3,29E-13 | 0,41 | Transducin/WD40-repeat-like-superfamily-protein                          |
| AT4G19410 | chr4_10582176 | cis   | -0,67±0,09 | 3,49E-13 | 0,36 | Pectinacetyltransferase-family-protein                                   |
| AT1G14520 | chr1_4969398  | cis   | -0,9±0,12  | 3,51E-13 | 0,15 | myo-inositol-oxygenase-1                                                 |
| AT2G46930 | chr2_19283244 | cis   | 0,73±0,1   | 3,78E-13 | 0,22 | Pectinacetyltransferase-family-protein                                   |
| AT1G66860 | chr1_24943021 | cis   | -0,65±0,09 | 3,79E-13 | 0,41 | Class-I-glutamine-amidotransferase-like-superfamily-protein              |
| AT1G30740 | chr1_10902868 | cis   | -0,62±0,09 | 3,81E-13 | 0,51 | FAD-binding-Berberine-family-protein                                     |
| AT4G12670 | chr4_7468587  | cis   | -0,61±0,08 | 3,81E-13 | 0,49 | Homeodomain-like-superfamily-protein                                     |
| AT1G01690 | chr1_249475   | cis   | -0,66±0,09 | 3,83E-13 | 0,48 | putative-recombination-initiation-defects-3                              |
| AT5G47510 | chr5_19280615 | cis   | -0,64±0,09 | 3,89E-13 | 0,37 | Sec14p-like-phosphatidylinositol-transfer-family-protein                 |
| AT4G27080 | chr4_13553783 | cis   | 0,74±0,1   | 3,94E-13 | 0,26 | PDI-like-5-4                                                             |
| AT1G19690 | chr1_6810785  | cis   | 0,66±0,09  | 4,00E-13 | 0,41 | NAD(P)-binding-Rossmann-fold-superfamily-protein                         |
| AT2G25510 | chr2_10856538 | cis   | -0,65±0,09 | 4,16E-13 | 0,41 |                                                                          |
| AT4G09430 | chr4_5974237  | cis   | -0,78±0,11 | 4,21E-13 | 0,20 | Disease-resistance-protein-(TIR-NBS-LRR-class)-family                    |
| AT4G38100 | chr4_17886975 | cis   | 0,65±0,09  | 4,36E-13 | 0,46 |                                                                          |
| AT1G29820 | chr1_10433128 | cis   | -0,71±0,1  | 4,61E-13 | 0,30 | Magnesium-transporter-CorA-like-family-protein                           |
| AT3G02900 | chr3_647521   | cis   | 0,69±0,1   | 4,67E-13 | 0,42 |                                                                          |
| AT5G26160 | chr5_9142426  | cis   | 0,62±0,09  | 4,76E-13 | 0,57 |                                                                          |
| AT5G23010 | chr5_7700167  | cis   | -0,67±0,09 | 4,86E-13 | 0,25 | methylthioalkylmalate-synthase-1                                         |
| AT2G38720 | chr2_16167438 | cis   | 0,78±0,11  | 4,90E-13 | 0,20 | microtubule-associated-protein-65-5                                      |
| AT3G56460 | chr3_20923532 | cis   | -0,73±0,1  | 4,99E-13 | 0,25 | GroES-like-zinc-binding-alcohol-dehydrogenase-family-protein             |
| AT2G43920 | chr2_18191504 | cis   | -0,69±0,09 | 5,02E-13 | 0,31 | S-adenosyl-L-methionine-dependent-methyltransferases-superfamily-protein |
| AT1G66100 | chr1_24609666 | cis   | 0,79±0,11  | 5,10E-13 | 0,21 | Plant-thionin                                                            |

|           |               |     |            |          |      |                                                                                                   |
|-----------|---------------|-----|------------|----------|------|---------------------------------------------------------------------------------------------------|
| AT1G77720 | chr1_29210222 | cis | 0,8±0,11   | 5,30E-13 | 0,19 | putative-protein-kinase-1                                                                         |
| AT1G01355 | chr1_136383   | cis | -0,67±0,09 | 5,35E-13 | 0,48 | Putative-endonuclease-or-glycosyl-hydrolase                                                       |
| AT1G59780 | chr1_21994094 | cis | 0,82±0,11  | 5,63E-13 | 0,15 | NB-ARC-domain-containing-disease-resistance-protein                                               |
| AT1G16820 | chr1_5756373  | cis | -0,81±0,11 | 5,80E-13 | 0,19 | vacuolar-ATP-synthase-catalytic-subunit-related-/-V-ATPase-related-/-vacuolar-proton-pump-related |
| AT5G63620 | chr5_25468341 | cis | -0,68±0,09 | 5,91E-13 | 0,47 | GroES-like-zinc-binding-alcohol-dehydrogenase-family-protein                                      |
| AT2G26750 | chr2_11393446 | cis | -0,62±0,09 | 5,94E-13 | 0,38 | alpha/beta-Hydrolases-superfamily-protein                                                         |
| AT1G02260 | chr1_442418   | cis | -0,67±0,09 | 5,97E-13 | 0,33 | Divalent-ion-symporter                                                                            |
| AT1G66530 | chr1_24823755 | cis | 0,61±0,08  | 5,99E-13 | 0,46 | Arginyl-tRNA-synthetase,-class-Ic                                                                 |
| AT1G58280 | chr1_21614442 | cis | 0,66±0,09  | 5,99E-13 | 0,39 | Phosphoglycerate-mutase-family-protein                                                            |
| AT2G46450 | chr2_19069130 | cis | -0,72±0,1  | 6,43E-13 | 0,23 | cyclic-nucleotide-gated-channel-12                                                                |
| AT4G18930 | chr4_10370636 | cis | -0,85±0,12 | 6,48E-13 | 0,18 | RNA-ligase/cyclic-nucleotide-phosphodiesterase-family-protein                                     |
| AT5G48020 | chr5_19470007 | cis | -0,72±0,1  | 6,70E-13 | 0,31 | 2-oxoglutarate-(2OG)-and-Fe(II)-dependent-oxygenase-superfamily-protein                           |
| AT4G13918 | chr4_8047254  | cis | -0,59±0,08 | 6,79E-13 | 0,43 |                                                                                                   |
| AT2G45150 | chr2_18613863 | cis | 0,81±0,11  | 6,95E-13 | 0,21 | cytidinediphosphate-diacylglycerol-synthase-4                                                     |
| AT3G48260 | chr3_17875002 | cis | 0,61±0,09  | 7,22E-13 | 0,45 | with-no-lysine-(K)-kinase-3                                                                       |
| AT4G12680 | chr4_7467417  | cis | -0,61±0,09 | 7,32E-13 | 0,45 |                                                                                                   |
| AT1G24240 | chr1_8586603  | cis | 0,65±0,09  | 7,66E-13 | 0,34 | Ribosomal-protein-L19-family-protein                                                              |
| AT4G12520 | chr4_7415194  | cis | -0,69±0,1  | 7,71E-13 | 0,24 | Bifunctional-inhibitor/lipid-transfer-protein/seed-storage-2S-albumin-superfamily-protein         |
| AT1G28620 | chr1_10062524 | cis | -0,94±0,13 | 7,75E-13 | 0,14 |                                                                                                   |
| AT3G28140 | chr3_10469441 | cis | 0,69±0,1   | 7,79E-13 | 0,29 | RNA-ligase/cyclic-nucleotide-phosphodiesterase-family-protein                                     |
| AT4G20340 | chr4_10983382 | cis | -0,68±0,09 | 7,83E-13 | 0,31 | Transcription-factor-TFIIIE,-alpha-subunit                                                        |
| AT2G04800 | chr2_1688172  | cis | -0,7±0,1   | 7,85E-13 | 0,24 |                                                                                                   |
| AT1G12390 | chr1_4222207  | cis | -0,67±0,09 | 7,88E-13 | 0,34 | Cornichon-family-protein                                                                          |
| AT1G53830 | chr1_20101000 | cis | -0,64±0,09 | 8,01E-13 | 0,40 | pectin-methylesterase-2                                                                           |
| AT5G10600 | chr5_3352806  | cis | -0,75±0,11 | 8,05E-13 | 0,22 | cytochrome-P450,-family-81,-subfamily-K,-polypeptide-2                                            |
| AT1G65200 | chr1_24222811 | cis | -0,91±0,13 | 8,14E-13 | 0,14 | Ubiquitin-carboxyl-terminal-hydrolase-related-protein                                             |
| AT2G35520 | chr2_14920429 | cis | -0,68±0,09 | 8,23E-13 | 0,36 | Defender-against-death-(DAD-family)-protein                                                       |
| AT3G46530 | chr3_17133077 | cis | -0,62±0,09 | 8,62E-13 | 0,40 | NB-ARC-domain-containing-disease-resistance-protein                                               |
| AT2G21860 | chr2_9305442  | cis | 0,88±0,12  | 8,62E-13 | 0,14 | violaxanthin-de-epoxidase-related                                                                 |
| AT1G51538 | chr1_19112612 | cis | 0,91±0,13  | 8,64E-13 | 0,12 | Aminotransferase-like,-plant-mobile-domain-family-protein                                         |
| AT4G00650 | chr4_259252   | cis | -0,83±0,12 | 8,78E-13 | 0,22 | FRIGIDA-like-protein                                                                              |
| AT2G29570 | chr2_12641575 | cis | -0,61±0,08 | 8,87E-13 | 0,37 | proliferating-cell-nuclear-antigen-2                                                              |
| AT3G61010 | chr3_22577967 | cis | 0,62±0,09  | 8,92E-13 | 0,48 | Ferritin/ribonucleotide-reductase-like-family-protein                                             |
| AT1G16130 | chr1_5520044  | cis | -0,9±0,13  | 8,97E-13 | 0,14 | wall-associated-kinase-like-2                                                                     |

|           |               |       |            |          |      |                                                                          |
|-----------|---------------|-------|------------|----------|------|--------------------------------------------------------------------------|
| AT3G49050 | chr3_18179526 | cis   | -0,65±0,09 | 9,14E-13 | 0,32 | alpha/beta-Hydrolases-superfamily-protein                                |
| AT5G41960 | chr5_16780285 | cis   | -0,83±0,12 | 9,17E-13 | 0,17 |                                                                          |
| AT5G42530 | chr5_17002945 | cis   | -0,92±0,13 | 9,22E-13 | 0,14 |                                                                          |
| AT5G25800 | chr5_8982250  | cis   | 0,71±0,1   | 9,35E-13 | 0,26 | Polynucleotidyl-transferase,-ribonuclease-H-like-superfamily-protein     |
| AT5G48340 | chr5_19591922 | cis   | -0,75±0,1  | 9,87E-13 | 0,26 |                                                                          |
| AT1G74280 | chr1_27930080 | cis   | -0,62±0,09 | 1,02E-12 | 0,39 | alpha/beta-Hydrolases-superfamily-protein                                |
| AT1G65370 | chr1_24285650 | cis   | 0,59±0,08  | 1,03E-12 | 0,44 | TRAF-like-family-protein                                                 |
| AT4G19070 | chr4_10451283 | cis   | -0,72±0,1  | 1,04E-12 | 0,29 | Putative-membrane-lipoprotein                                            |
| AT5G38020 | chr5_15165080 | cis   | -0,62±0,09 | 1,05E-12 | 0,44 | S-adenosyl-L-methionine-dependent-methyltransferases-superfamily-protein |
| AT5G03495 | chr5_16706120 | trans | 0,6±0,08   | 1,05E-12 | 0,51 | RNA-binding-(RRM/RBD/RNP-motifs)-family-protein                          |
| AT4G05530 | chr4_2817353  | cis   | -0,67±0,09 | 1,07E-12 | 0,39 | indole-3-butyric-acid-response-1                                         |
| AT5G38860 | chr5_15559675 | cis   | -0,74±0,1  | 1,09E-12 | 0,24 | BES1-interacting-Myc-like-protein-3                                      |
| AT1G05830 | chr1_1753743  | cis   | -0,65±0,09 | 1,12E-12 | 0,50 | trithorax-like-protein-2                                                 |
| AT4G37120 | chr4_17489547 | cis   | -0,77±0,11 | 1,12E-12 | 0,19 | Pre-mRNA-splicing-Prp18-interacting-factor                               |
| AT3G60480 | chr3_22348103 | cis   | -0,67±0,09 | 1,12E-12 | 0,29 |                                                                          |
| AT4G15960 | chr4_9047223  | cis   | 0,82±0,12  | 1,15E-12 | 0,16 | alpha/beta-Hydrolases-superfamily-protein                                |
| AT5G24310 | chr5_8273614  | cis   | -0,62±0,09 | 1,15E-12 | 0,47 | ABL-interactor-like-protein-3                                            |
| AT5G47810 | chr5_19348410 | cis   | 0,63±0,09  | 1,21E-12 | 0,44 | phosphofructokinase-2                                                    |
| AT1G48960 | chr1_18112039 | cis   | -0,73±0,1  | 1,22E-12 | 0,26 | Adenine-nucleotide-alpha-hydrolases-like-superfamily-protein             |
| AT3G04181 | chr3_1099944  | cis   | -0,84±0,12 | 1,24E-12 | 0,16 |                                                                          |
| AT2G42160 | chr2_17574128 | cis   | 0,77±0,11  | 1,26E-12 | 0,19 | zinc-finger-(ubiquitin-hydrolase)-domain-containing-protein              |
| AT1G26200 | chr1_9064978  | cis   | 0,72±0,1   | 1,29E-12 | 0,24 | TRAM,-LAG1-and-CLN8-(TLC)-lipid-sensing-domain-containing-protein        |
| AT5G35796 | chr5_13969400 | cis   | -0,64±0,09 | 1,29E-12 | 0,58 |                                                                          |
| AT2G40570 | chr2_16940810 | cis   | 0,85±0,12  | 1,34E-12 | 0,18 | initiator-tRNA-phosphoribosyl-transferase-family-protein                 |
| AT2G02770 | chr2_772832   | cis   | -0,64±0,09 | 1,46E-12 | 0,37 | 4'-phosphopantetheinyl-transferase-superfamily                           |
| AT5G35530 | chr5_13711886 | cis   | -0,71±0,1  | 1,49E-12 | 0,32 | Ribosomal-protein-S3-family-protein                                      |
| AT5G43830 | chr5_17624441 | cis   | 0,55±0,08  | 1,53E-12 | 0,50 | Aluminium-induced-protein-with-YGL-and-LRDR-motifs                       |
| AT5G53220 | chr5_21595969 | cis   | -0,7±0,1   | 1,57E-12 | 0,29 |                                                                          |
| AT5G59770 | chr5_24080644 | cis   | -0,75±0,11 | 1,61E-12 | 0,22 | Protein-tyrosine-phosphatase-like,-PTPLA                                 |
| AT4G19100 | chr4_10453802 | cis   | 0,82±0,12  | 1,63E-12 | 0,21 | Protein-of-unknown-function-(DUF3464)                                    |
| AT4G13640 | chr4_7939172  | cis   | -0,87±0,12 | 1,65E-12 | 0,14 | Homeodomain-like-superfamily-protein                                     |
| AT2G09970 | chr1_27304145 | trans | -0,62±0,09 | 1,66E-12 | 0,41 | Protein-of-unknown-function-(DUF1677)                                    |
| AT1G52980 | chr1_19738355 | cis   | 0,61±0,09  | 1,70E-12 | 0,44 | GTP-binding-family-protein                                               |
| AT4G29550 | chr4_14497223 | cis   | 0,83±0,12  | 1,76E-12 | 0,15 | Protein-of-unknown-function-(DUF626)                                     |

|           |               |       |            |          |      |                                                                                                    |
|-----------|---------------|-------|------------|----------|------|----------------------------------------------------------------------------------------------------|
| AT4G11640 | chr4_7024518  | cis   | 0,74±0,1   | 1,79E-12 | 0,21 | serine-racemase                                                                                    |
| AT3G46580 | chr3_17139514 | cis   | -0,84±0,12 | 1,83E-12 | 0,14 | methyl-CPG-binding-domain-protein-5                                                                |
| AT4G08250 | chr4_5195761  | cis   | 0,62±0,09  | 1,85E-12 | 0,38 | GRAS-family-transcription-factor                                                                   |
| AT4G02120 | chr4_942894   | cis   | 0,65±0,09  | 1,90E-12 | 0,30 | CTP-synthase-family-protein                                                                        |
| AT4G25340 | chr4_12962704 | cis   | 0,78±0,11  | 1,91E-12 | 0,23 | FK506-BINDING-PROTEIN-53                                                                           |
| AT4G07410 | chr4_4203200  | cis   | 0,74±0,1   | 1,92E-12 | 0,30 | Transducin-family-protein-/-WD-40-repeat-family-protein                                            |
| AT1G19397 | chr1_6703658  | cis   | -0,68±0,1  | 1,98E-12 | 0,31 |                                                                                                    |
| AT5G45560 | chr5_18465446 | cis   | 0,63±0,09  | 2,03E-12 | 0,36 | Pleckstrin-homology-(PH)-domain-containing-protein-/-lipid-binding-START-domain-containing-protein |
| AT4G39240 | chr4_18269285 | cis   | -0,67±0,09 | 2,05E-12 | 0,37 | Galactose-oxidase/kelch-repeat-superfamily-protein                                                 |
| AT3G23560 | chr3_8456447  | cis   | -0,69±0,1  | 2,08E-12 | 0,25 | MATE-efflux-family-protein                                                                         |
| AT3G25490 | chr1_7447447  | trans | 0,87±0,12  | 2,12E-12 | 0,13 | Protein-kinase-family-protein                                                                      |
| AT5G14210 | chr5_4578361  | cis   | -0,64±0,09 | 2,30E-12 | 0,43 | Leucine-rich-repeat-protein-kinase-family-protein                                                  |
| AT5G43070 | chr5_17289785 | cis   | -0,61±0,09 | 2,35E-12 | 0,40 | WPP-domain-protein-1                                                                               |
| AT3G57430 | chr3_21255050 | cis   | 0,68±0,1   | 2,42E-12 | 0,32 | Tetratricopeptide-repeat-(TPR)-like-superfamily-protein                                            |
| AT5G26180 | chr5_9149412  | cis   | -0,63±0,09 | 2,46E-12 | 0,33 | S-adenosyl-L-methionine-dependent-methyltransferases-superfamily-protein                           |
| AT1G65520 | chr1_24359557 | cis   | -0,8±0,11  | 2,55E-12 | 0,19 | delta(3),-delta(2)-enoyl-CoA-isomerase-1                                                           |
| AT3G59380 | chr3_21945839 | cis   | -0,61±0,09 | 2,60E-12 | 0,52 | farnesyltransferase-A                                                                              |
| AT1G48380 | chr1_17879415 | cis   | 0,76±0,11  | 2,61E-12 | 0,21 | root-hair-initiation-protein-root-hairless-1-(RHL1)                                                |
| AT1G31150 | chr1_11120051 | cis   | 0,61±0,09  | 2,64E-12 | 0,40 | Domain-of-unknown-function-(DUF1985)                                                               |
| AT1G72890 | chr1_27430024 | cis   | 0,64±0,09  | 2,67E-12 | 0,39 | Disease-resistance-protein-(TIR-NBS-class)                                                         |
| AT2G32830 | chr2_13930701 | cis   | -0,73±0,11 | 2,70E-12 | 0,27 | phosphate-transporter-1;5                                                                          |
| AT3G15590 | chr3_5289455  | cis   | 0,67±0,1   | 2,76E-12 | 0,39 | Tetratricopeptide-repeat-(TPR)-like-superfamily-protein                                            |
| AT4G23200 | chr4_12145728 | cis   | -0,76±0,11 | 2,79E-12 | 0,21 | cysteine-rich-RLK-(RECEPTOR-like-protein-kinase)-12                                                |
| AT5G44010 | chr5_17711255 | cis   | 0,67±0,1   | 2,83E-12 | 0,26 |                                                                                                    |
| AT4G25770 | chr4_13120538 | cis   | -0,69±0,1  | 2,91E-12 | 0,29 | alpha/beta-Hydrolases-superfamily-protein                                                          |
| AT5G41170 | chr5_16480617 | cis   | 0,68±0,1   | 2,95E-12 | 0,28 | Pentatricopeptide-repeat-(PPR-like)-superfamily-protein                                            |
| AT2G30960 | chr2_13170243 | cis   | -0,81±0,12 | 3,07E-12 | 0,19 |                                                                                                    |
| AT5G54064 | chr5_21939485 | cis   | -0,81±0,12 | 3,12E-12 | 0,19 |                                                                                                    |
| AT4G07868 | chr4_4692338  | cis   | 0,65±0,09  | 3,14E-12 | 0,31 |                                                                                                    |
| AT2G36680 | chr2_15370601 | cis   | -0,66±0,09 | 3,22E-12 | 0,30 | Modifier-of-rudimentary-(Mod(r))-protein                                                           |
| AT3G23109 | chr3_8218794  | cis   | 0,62±0,09  | 3,24E-12 | 0,39 |                                                                                                    |
| AT3G24255 | chr3_8793946  | cis   | -0,66±0,1  | 3,29E-12 | 0,36 | RNA-directed-DNA-polymerase-(reverse-transcriptase)-related-family-protein                         |
| AT1G34110 | chr1_12417145 | cis   | -0,59±0,09 | 3,31E-12 | 0,42 | Leucine-rich-receptor-like-protein-kinase-family-protein                                           |
| AT1G67850 | chr1_25442185 | cis   | 0,68±0,1   | 3,32E-12 | 0,36 | Protein-of-unknown-function-(DUF707)                                                               |

|           |               |       |            |          |      |                                                                          |
|-----------|---------------|-------|------------|----------|------|--------------------------------------------------------------------------|
| AT3G56680 | chr3_20991323 | cis   | 0,61±0,09  | 3,36E-12 | 0,50 | Single-stranded-nucleic-acid-binding-R3H-protein                         |
| AT3G60965 | chr3_22593699 | cis   | 0,64±0,09  | 3,36E-12 | 0,28 | transposable-element-gene                                                |
| AT2G35830 | chr2_15050779 | cis   | 0,74±0,11  | 3,37E-12 | 0,25 |                                                                          |
| AT3G50210 | chr3_18617672 | cis   | 0,64±0,09  | 3,41E-12 | 0,37 | 2-oxoglutarate-(2OG)-and-Fe(II)-dependent-oxygenase-superfamily-protein  |
| AT1G17240 | chr1_5898135  | cis   | 0,69±0,1   | 3,45E-12 | 0,29 | receptor-like-protein-2                                                  |
| AT4G28740 | chr4_14201805 | cis   | -0,94±0,14 | 3,47E-12 | 0,11 |                                                                          |
| AT1G11280 | chr1_3785997  | cis   | -0,67±0,1  | 3,48E-12 | 0,33 | S-locus-lectin-protein-kinase-family-protein                             |
| AT1G18773 | chr1_6473466  | cis   | 0,74±0,11  | 3,51E-12 | 0,22 |                                                                          |
| AT1G22650 | chr1_8016139  | cis   | 0,68±0,1   | 3,56E-12 | 0,28 | Plant-neutral-invertase-family-protein                                   |
| AT4G23310 | chr4_12137949 | cis   | 0,65±0,09  | 3,64E-12 | 0,39 | cysteine-rich-RLK-(RECEPTOR-like-protein-kinase)-23                      |
| AT1G21210 | chr1_7447447  | cis   | 0,88±0,13  | 3,66E-12 | 0,13 | wall-associated-kinase-4                                                 |
| AT3G25400 | chr3_9213250  | cis   | -0,59±0,08 | 3,92E-12 | 0,40 |                                                                          |
| AT1G18410 | chr1_21500435 | trans | 0,62±0,09  | 3,95E-12 | 0,36 | P-loop-containing-nucleoside-triphosphate-hydrolases-superfamily-protein |
| AT3G29390 | chr3_11290769 | cis   | -0,71±0,1  | 3,97E-12 | 0,26 | RS2-interacting-KH-protein                                               |
| AT5G56370 | chr5_22842831 | cis   | -0,7±0,1   | 4,07E-12 | 0,19 | F-box/RNI-like/FBD-like-domains-containing-protein                       |
| AT1G24100 | chr1_8527073  | cis   | -0,68±0,1  | 4,17E-12 | 0,32 | UDP-glucosyl-transferase-74B1                                            |
| AT5G08565 | chr5_2775823  | cis   | 0,85±0,12  | 4,17E-12 | 0,18 | Transcription-initiation-Spt4-like-protein                               |
| AT4G24175 | chr4_12546464 | cis   | 0,61±0,09  | 4,22E-12 | 0,41 |                                                                          |
| AT2G29910 | chr2_12747060 | cis   | -0,89±0,13 | 4,23E-12 | 0,14 | F-box/RNI-like-superfamily-protein                                       |
| AT5G38980 | chr5_15616106 | cis   | -0,97±0,14 | 4,26E-12 | 0,11 |                                                                          |
| AT2G18210 | chr2_7925812  | cis   | -0,58±0,08 | 4,27E-12 | 0,56 |                                                                          |
| AT3G60150 | chr3_22225185 | cis   | -0,68±0,1  | 4,39E-12 | 0,29 | Protein-of-unknown-function-(DUF498/DUF598)                              |
| AT3G17626 | chr3_6027963  | cis   | -0,61±0,09 | 4,40E-12 | 0,53 | structural-constituent-of-ribosome                                       |
| AT5G38590 | chr5_15460933 | cis   | 0,67±0,1   | 4,50E-12 | 0,30 | F-box/RNI-like/FBD-like-domains-containing-protein                       |
| AT3G06110 | chr3_1843238  | cis   | 0,67±0,1   | 4,67E-12 | 0,38 | MAPK-phosphatase-2                                                       |
| AT4G10810 | chr4_6645980  | cis   | -0,61±0,09 | 4,68E-12 | 0,43 |                                                                          |
| AT5G05890 | chr5_1770444  | cis   | 0,64±0,09  | 4,77E-12 | 0,44 | UDP-Glycosyltransferase-superfamily-protein                              |
| AT2G16850 | chr2_7306624  | cis   | 0,68±0,1   | 4,77E-12 | 0,30 | plasma-membrane-intrinsic-protein-2;8                                    |
| AT5G66455 | chr5_26538158 | cis   | 0,61±0,09  | 4,98E-12 | 0,48 |                                                                          |
| AT2G27402 | chr2_11711907 | cis   | 0,69±0,1   | 5,02E-12 | 0,31 |                                                                          |
| AT1G52800 | chr1_19661599 | cis   | -0,64±0,09 | 5,09E-12 | 0,39 | 2-oxoglutarate-(2OG)-and-Fe(II)-dependent-oxygenase-superfamily-protein  |
| AT2G41600 | chr2_17347276 | cis   | -0,82±0,12 | 5,18E-12 | 0,17 | Mitochondrial-glycoprotein-family-protein                                |
| AT3G43610 | chr3_15524846 | cis   | 0,7±0,1    | 5,30E-12 | 0,22 | Spc97/-/Spc98-family-of-spindle-pole-body-(SBP)-component                |
| AT3G49340 | chr3_18295338 | cis   | 0,62±0,09  | 5,46E-12 | 0,38 | Cysteine-proteinases-superfamily-protein                                 |



|           |               |       |            |          |      |                                                                          |
|-----------|---------------|-------|------------|----------|------|--------------------------------------------------------------------------|
| AT1G61500 | chr1_22689801 | cis   | -0,59±0,09 | 5,60E-12 | 0,44 | S-locus-lectin-protein-kinase-family-protein                             |
| AT1G65280 | chr1_24245770 | cis   | 0,59±0,09  | 5,63E-12 | 0,51 | DNAJ-heat-shock-N-terminal-domain-containing-protein                     |
| AT4G04402 | chr4_2164811  | cis   | -0,67±0,1  | 5,74E-12 | 0,34 | two-component-phosphorelay-mediator,-putative                            |
| AT5G40405 | chr5_16166653 | cis   | 0,72±0,1   | 5,80E-12 | 0,20 | Tetratricopeptide-repeat-(TPR)-like-superfamily-protein                  |
| AT1G13790 | chr1_4726993  | cis   | 0,68±0,1   | 6,14E-12 | 0,34 | XH/XS-domain-containing-protein                                          |
| AT5G38060 | chr5_15189750 | cis   | 0,62±0,09  | 6,17E-12 | 0,33 |                                                                          |
| AT1G04360 | chr1_1175561  | cis   | -0,87±0,13 | 6,30E-12 | 0,14 | RING/U-box-superfamily-protein                                           |
| AT4G15420 | chr4_8824699  | cis   | 0,69±0,1   | 6,34E-12 | 0,26 | Ubiquitin-fusion-degradation-UFD1-family-protein                         |
| AT4G02660 | chr4_1158571  | cis   | -0,6±0,09  | 6,35E-12 | 0,49 | Beige/BEACH-domain-;WD-domain,-G-beta-repeat-protein                     |
| AT3G32920 | chr3_13442123 | cis   | 0,91±0,13  | 6,70E-12 | 0,14 | P-loop-containing-nucleoside-triphosphate-hydrolases-superfamily-protein |
| AT5G49555 | chr5_20110273 | cis   | 0,71±0,1   | 6,75E-12 | 0,21 | FAD/NAD(P)-binding-oxidoreductase-family-protein                         |
| AT1G23120 | chr1_8198583  | cis   | 0,87±0,13  | 6,76E-12 | 0,16 | Polyketide-cyclase/dehydrase-and-lipid-transport-superfamily-protein     |
| AT4G32950 | chr4_15911442 | cis   | 0,64±0,09  | 6,94E-12 | 0,37 | Protein-phosphatase-2C-family-protein                                    |
| AT5G01970 | chr5_374088   | cis   | -0,64±0,09 | 7,04E-12 | 0,51 |                                                                          |
| AT1G12230 | chr1_4152530  | cis   | -0,61±0,09 | 7,10E-12 | 0,52 | Aldolase-superfamily-protein                                             |
| AT5G16350 | chr5_5353646  | cis   | 0,66±0,1   | 7,17E-12 | 0,29 | O-acyltransferase-(WSD1-like)-family-protein                             |
| AT5G11910 | chr5_3837551  | cis   | -0,84±0,12 | 7,19E-12 | 0,14 | alpha/beta-Hydrolases-superfamily-protein                                |
| AT4G36280 | chr4_17170011 | cis   | -0,69±0,1  | 7,20E-12 | 0,25 | Histidine-kinase-,-DNA-gyrase-B-,-and-HSP90-like-ATPase-family-protein   |
| AT2G15310 | chr2_6660296  | cis   | 0,6±0,09   | 7,21E-12 | 0,39 | ADP-ribosylation-factor-B1A                                              |
| AT5G42660 | chr5_17104571 | cis   | -0,66±0,1  | 7,55E-12 | 0,30 | Protein-of-unknown-function-(DUF616)                                     |
| AT1G12350 | chr1_4202765  | cis   | 0,63±0,09  | 7,58E-12 | 0,35 | 4-phospho-panto-thenoylcysteine-synthetase                               |
| AT3G25010 | chr3_9108946  | cis   | 0,62±0,09  | 7,59E-12 | 0,49 | receptor-like-protein-41                                                 |
| AT1G64150 | chr1_23811306 | cis   | 0,6±0,09   | 7,64E-12 | 0,41 | Uncharacterized-protein-family-(UPF0016)                                 |
| AT4G13150 | chr4_7649774  | cis   | -0,93±0,14 | 7,69E-12 | 0,12 |                                                                          |
| AT2G16370 | chr2_7085202  | cis   | 0,61±0,09  | 7,83E-12 | 0,39 | thymidylate-synthase-1                                                   |
| AT2G37680 | chr2_15803792 | cis   | -0,73±0,11 | 7,90E-12 | 0,20 |                                                                          |
| AT1G24793 | chr1_8839098  | trans | 0,59±0,09  | 7,96E-12 | 0,44 | UDP-3-O-acyl-N-acetylglucosamine-deacetylase-family-protein              |
| AT2G45920 | chr2_18895426 | cis   | -0,63±0,09 | 7,98E-12 | 0,32 | U-box-domain-containing-protein                                          |
| AT4G37150 | chr4_17494759 | cis   | 0,72±0,1   | 8,06E-12 | 0,27 | methyl-esterase-9                                                        |
| AT2G22410 | chr2_9507478  | cis   | 0,63±0,09  | 8,08E-12 | 0,47 | SLOW-GROWTH-1                                                            |
| AT5G24750 | chr5_8490354  | cis   | 0,78±0,11  | 8,40E-12 | 0,19 | UDP-Glycosyltransferase-superfamily-protein                              |
| AT1G12620 | chr1_4296754  | cis   | -0,71±0,1  | 8,55E-12 | 0,24 | Pentatricopeptide-repeat-(PPR)-superfamily-protein                       |
| AT1G03180 | chr1_779349   | cis   | 0,68±0,1   | 8,69E-12 | 0,31 |                                                                          |
| AT4G23300 | chr4_12178057 | cis   | -0,88±0,13 | 8,74E-12 | 0,13 | cysteine-rich-RLK-(RECEPTOR-like-protein-kinase)-22                      |

|           |               |       |            |          |      |                                                                  |
|-----------|---------------|-------|------------|----------|------|------------------------------------------------------------------|
| AT1G72130 | chr1_27137072 | cis   | 0,59±0,09  | 9,13E-12 | 0,54 | Major-facilitator-superfamily-protein                            |
| AT1G36980 | chr1_14065468 | cis   | 0,59±0,09  | 9,47E-12 | 0,44 |                                                                  |
| AT4G37410 | chr4_17591119 | cis   | -0,61±0,09 | 9,60E-12 | 0,51 | cytochrome-P450,-family-81,-subfamily-F,-polypeptide-4           |
| AT5G35730 | chr5_13896253 | cis   | 0,69±0,1   | 9,61E-12 | 0,24 | EXS-(ERD1/XPR1/SYG1)-family-protein                              |
| AT3G03070 | chr3_695184   | cis   | -0,66±0,1  | 9,79E-12 | 0,28 | NADH-ubiquinone-oxidoreductase-related                           |
| AT4G13170 | chr4_7655449  | cis   | 0,61±0,09  | 1,00E-11 | 0,41 | Ribosomal-protein-L13-family-protein                             |
| AT3G63480 | chr3_23440586 | cis   | 0,66±0,1   | 1,00E-11 | 0,26 | ATP-binding-microtubule-motor-family-protein                     |
| AT1G54217 | chr1_20243752 | cis   | -0,61±0,09 | 1,03E-11 | 0,40 | Ribosomal-protein-L18ae-family                                   |
| AT2G04550 | chr2_1579467  | cis   | -0,6±0,09  | 1,04E-11 | 0,46 | indole-3-butyric-acid-response-5                                 |
| AT2G14800 | chr2_6349052  | cis   | -0,62±0,09 | 1,06E-11 | 0,33 |                                                                  |
| AT2G04520 | chr2_1574787  | cis   | 0,6±0,09   | 1,07E-11 | 0,51 | Nucleic-acid-binding,-OB-fold-like-protein                       |
| AT5G28050 | chr5_10047341 | cis   | -0,65±0,1  | 1,08E-11 | 0,35 | Cytidine/deoxycytidylate-deaminase-family-protein                |
| AT3G20040 | chr3_6994828  | cis   | 0,65±0,1   | 1,09E-11 | 0,35 | Hexokinase                                                       |
| AT3G24982 | chr3_9108946  | cis   | 0,6±0,09   | 1,09E-11 | 0,49 | receptor-like-protein-40                                         |
| AT4G01040 | chr4_453349   | cis   | 0,64±0,09  | 1,10E-11 | 0,55 | Glycosyl-hydrolase-superfamily-protein                           |
| AT5G63030 | chr5_25287390 | cis   | -0,63±0,09 | 1,10E-11 | 0,44 | Thioredoxin-superfamily-protein                                  |
| AT4G14410 | chr4_8301179  | cis   | 0,61±0,09  | 1,10E-11 | 0,33 | basic-helix-loop-helix-(bHLH)-DNA-binding-superfamily-protein    |
| AT4G16180 | chr4_9168218  | cis   | -0,59±0,09 | 1,12E-11 | 0,48 |                                                                  |
| AT3G48820 | chr3_18102517 | cis   | -0,57±0,08 | 1,14E-11 | 0,44 | Glycosyltransferase-family-29-(sialyltransferase)-family-protein |
| AT1G22403 | chr5_26850990 | trans | 0,91±0,13  | 1,14E-11 | 0,11 | other-RNA                                                        |
| AT5G52190 | chr5_21202402 | cis   | -0,82±0,12 | 1,14E-11 | 0,16 | Sugar-isomerase-(SIS)-family-protein                             |
| AT4G00420 | chr4_181765   | cis   | -0,65±0,1  | 1,17E-11 | 0,27 | Double-stranded-RNA-binding-domain-(DsRBD)-containing-protein    |
| AT4G12200 | chr4_7280607  | cis   | -0,61±0,09 | 1,18E-11 | 0,36 | transposable-element-gene                                        |
| AT1G63870 | chr1_23712636 | cis   | 0,59±0,09  | 1,21E-11 | 0,44 | Disease-resistance-protein-(TIR-NBS-LRR-class)-family            |
| AT5G03360 | chr5_814645   | cis   | 0,58±0,09  | 1,23E-11 | 0,49 | DC1-domain-containing-protein                                    |
| AT1G72930 | chr1_27438135 | cis   | -0,89±0,13 | 1,24E-11 | 0,15 | toll/interleukin-1-receptor-like                                 |
| AT3G05685 | chr3_1672952  | cis   | 0,1±0,15   | 1,24E-11 | 0,09 | Cystatin/monellin-superfamily-protein                            |
| AT5G61550 | chr5_24747219 | cis   | -0,67±0,1  | 1,25E-11 | 0,29 | U-box-domain-containing-protein-kinase-family-protein            |
| AT2G36500 | chr2_15317806 | cis   | -0,74±0,11 | 1,31E-11 | 0,19 | CBS/-octicosapeptide/Phox/Bemp1-(PB1)-domains-containing-protein |
| AT5G58575 | chr5_23674026 | cis   | -0,61±0,09 | 1,33E-11 | 0,53 |                                                                  |
| AT2G21840 | chr2_9318420  | cis   | -0,62±0,09 | 1,33E-11 | 0,29 | Cysteine/Histidine-rich-C1-domain-family-protein                 |
| AT2G22482 | chr2_9548445  | cis   | -0,82±0,12 | 1,34E-11 | 0,16 |                                                                  |
| AT5G17040 | chr5_5607110  | cis   | 0,97±0,14  | 1,39E-11 | 0,10 | UDP-Glycosyltransferase-superfamily-protein                      |
| AT3G16700 | chr3_5688040  | cis   | 0,73±0,11  | 1,41E-11 | 0,22 | Fumarylacetoacetate-(FAA)-hydrolase-family                       |

|           |               |       |            |          |      |                                                                             |
|-----------|---------------|-------|------------|----------|------|-----------------------------------------------------------------------------|
| AT4G05060 | chr4_2590490  | cis   | 0,64±0,09  | 1,43E-11 | 0,35 | PapD-like-superfamily-protein                                               |
| AT1G31500 | chr1_11275511 | cis   | -0,64±0,09 | 1,46E-11 | 0,25 | DNase-I-like-superfamily-protein                                            |
| AT2G02960 | chr2_864047   | cis   | 0,67±0,1   | 1,48E-11 | 0,24 | RING/FYVE/PHD-zinc-finger-superfamily-protein                               |
| AT1G75100 | chr1_28192328 | cis   | -0,67±0,1  | 1,52E-11 | 0,27 | J-domain-protein-required-for-chloroplast-accumulation-response-1           |
| AT2G03760 | chr2_1150723  | cis   | 0,74±0,11  | 1,52E-11 | 0,20 | sulphotransferase-12                                                        |
| AT1G23130 | chr1_8198411  | cis   | -0,9±0,13  | 1,54E-11 | 0,11 | Polyketide-cyclase/dehydrase-and-lipid-transport-superfamily-protein        |
| AT1G60220 | chr1_22212081 | cis   | 0,7±0,1    | 1,54E-11 | 0,21 | UB-like-protease-1D                                                         |
| AT3G18165 | chr3_6222138  | cis   | -0,67±0,1  | 1,54E-11 | 0,23 | modifier-of-snc1,4                                                          |
| AT3G47220 | chr3_17387327 | cis   | 0,58±0,09  | 1,57E-11 | 0,46 | phosphatidylinositol-speciwc-phospholipase-C9                               |
| AT1G20050 | chr1_6947020  | cis   | 0,68±0,1   | 1,62E-11 | 0,33 | C-8,7-sterol-isomerase                                                      |
| AT1G03220 | chr1_786874   | cis   | -0,63±0,09 | 1,63E-11 | 0,41 | Eukaryotic-aspartyl-protease-family-protein                                 |
| AT1G08530 | chr1_2700642  | cis   | -0,65±0,1  | 1,63E-11 | 0,34 |                                                                             |
| AT1G79529 | chr1_29920199 | cis   | -0,78±0,12 | 1,65E-11 | 0,16 | other-RNA                                                                   |
| AT5G07000 | chr5_2172553  | cis   | -0,78±0,12 | 1,65E-11 | 0,17 | sulfotransferase-2B                                                         |
| AT1G47625 | chr1_17510207 | cis   | 0,6±0,09   | 1,69E-11 | 0,43 |                                                                             |
| AT3G27430 | chr3_10156913 | cis   | -0,61±0,09 | 1,72E-11 | 0,35 | N-terminal-nucleophile-aminohydrolases-(Ntn-hydrolases)-superfamily-protein |
| AT5G24450 | chr5_8348974  | cis   | -0,62±0,09 | 1,72E-11 | 0,40 | Transcription-factor-IIIC,-subunit-5                                        |
| AT1G02020 | chr1_353313   | cis   | 0,59±0,09  | 1,73E-11 | 0,48 | nitroreductase-family-protein                                               |
| AT4G33945 | chr4_16274000 | cis   | -0,64±0,1  | 1,74E-11 | 0,34 | ARM-repeat-superfamily-protein                                              |
| AT1G60700 | chr1_22355520 | cis   | 0,62±0,09  | 1,75E-11 | 0,33 | SMAD/FHA-domain-containing-protein-                                         |
| AT4G00620 | chr4_261007   | cis   | 0,74±0,11  | 1,82E-11 | 0,26 | Amino-acid-dehydrogenase-family-protein                                     |
| AT3G21580 | chr3_7602812  | cis   | -0,84±0,13 | 1,87E-11 | 0,14 | cobalt-ion-transmembrane-transporters                                       |
| AT2G23110 | chr2_9840409  | cis   | 0,74±0,11  | 1,88E-11 | 0,24 | Late-embryogenesis-abundant-protein,-group-6                                |
| AT3G16640 | chr3_5669704  | cis   | -0,63±0,09 | 1,90E-11 | 0,29 | translationally-controlled-tumor-protein                                    |
| AT4G02425 | chr4_1063049  | cis   | -0,62±0,09 | 1,95E-11 | 0,39 |                                                                             |
| AT2G39230 | chr2_16387379 | cis   | 0,83±0,12  | 1,95E-11 | 0,14 | LATERAL-ORGAN-JUNCTION                                                      |
| AT1G58410 | chr1_21702313 | cis   | 0,58±0,09  | 2,01E-11 | 0,43 | Disease-resistance-protein-(CC-NBS-LRR-class)-family                        |
| AT3G54420 | chr3_20145503 | cis   | -0,61±0,09 | 2,01E-11 | 0,41 | homolog-of-carrot-EP3-3-chitinase                                           |
| AT4G39235 | chr4_18268432 | cis   | -0,67±0,1  | 2,01E-11 | 0,23 |                                                                             |
| AT5G41000 | chr3_18025128 | trans | -0,68±0,1  | 2,02E-11 | 0,30 | YELLOW-STRIFE-like-4                                                        |
| AT5G04220 | chr5_1159530  | cis   | -0,86±0,13 | 2,11E-11 | 0,13 | Calcium-dependent-lipid-binding-(CaLB-domain)-family-protein                |
| AT1G28670 | chr1_10077576 | cis   | 0,75±0,11  | 2,13E-11 | 0,20 | GDSL-like-Lipase/Acylhydrolase-superfamily-protein                          |
| AT2G01400 | chr2_175191   | cis   | -0,68±0,1  | 2,16E-11 | 0,23 |                                                                             |
| AT1G18940 | chr1_6530366  | cis   | 0,63±0,09  | 2,17E-11 | 0,39 | Nodulin-like-/-Major-Facilitator-Superfamily-protein                        |

|           |               |       |            |          |      |                                                                                                                                                 |
|-----------|---------------|-------|------------|----------|------|-------------------------------------------------------------------------------------------------------------------------------------------------|
| AT4G29050 | chr4_14317089 | cis   | 0,68±0,1   | 2,17E-11 | 0,29 | Concanavalin-A-like-lectin-protein-kinase-family-protein                                                                                        |
| AT3G14160 | chr3_4689076  | cis   | 0,86±0,13  | 2,27E-11 | 0,14 | 2-oxoglutarate-dependent-dioxygenase-family-protein                                                                                             |
| AT1G09820 | chr1_3192055  | cis   | -0,57±0,09 | 2,29E-11 | 0,45 | Pentatricopeptide-repeat-(PPR-like)-superfamily-protein                                                                                         |
| AT2G21870 | chr2_9321894  | cis   | -0,63±0,09 | 2,33E-11 | 0,31 | copper-ion-binding;cobalt-ion-binding;zinc-ion-binding                                                                                          |
| AT1G19750 | chr1_6832148  | cis   | 0,71±0,11  | 2,36E-11 | 0,24 | Transducin/WD40-repeat-like-superfamily-protein                                                                                                 |
| AT5G37130 | chr5_14680473 | cis   | 0,69±0,1   | 2,38E-11 | 0,22 | Protein-prenyltransferase-superfamily-protein                                                                                                   |
| AT2G19910 | chr2_8600617  | cis   | -0,64±0,1  | 2,40E-11 | 0,32 | RNA-dependent-RNA-polymerase-family-protein                                                                                                     |
| AT5G40880 | chr5_16378279 | cis   | 0,6±0,09   | 2,43E-11 | 0,44 | WD-40-repeat-family-protein/-zfw3-protein-(ZFW3)                                                                                                |
| AT4G14490 | chr4_8333079  | cis   | 0,73±0,11  | 2,43E-11 | 0,19 | SMAD/FHA-domain-containing-protein-                                                                                                             |
| AT4G04790 | chr4_2437780  | cis   | 0,63±0,09  | 2,43E-11 | 0,32 | Tetratricopeptide-repeat-(TPR)-like-superfamily-protein                                                                                         |
| AT1G71330 | chr1_26879415 | cis   | 0,66±0,1   | 2,50E-11 | 0,26 | non-intrinsic-ABC-protein-5                                                                                                                     |
| AT4G38300 | chr4_17946830 | cis   | 0,62±0,09  | 2,55E-11 | 0,30 | glycosyl-hydrolase-family-10-protein                                                                                                            |
| AT3G53100 | chr3_19687722 | cis   | -0,61±0,09 | 2,59E-11 | 0,45 | GDSL-like-Lipase/Acylhydrolase-superfamily-protein                                                                                              |
| AT2G48120 | chr2_19683015 | cis   | 0,58±0,09  | 2,64E-11 | 0,44 | pale-cress-protein-(PAC)                                                                                                                        |
| AT4G31540 | chr4_15278621 | cis   | -0,64±0,1  | 2,65E-11 | 0,37 | exocyst-subunit-exo70-family-protein-G1                                                                                                         |
| AT1G69450 | chr1_26110274 | cis   | -0,57±0,08 | 2,70E-11 | 0,49 | Early-responsive-to-dehydration-stress-protein-(ERD4)                                                                                           |
| AT5G43600 | chr5_17512663 | cis   | 0,85±0,13  | 2,70E-11 | 0,14 | ureidoglycolate-amidohydrolase                                                                                                                  |
| AT5G24660 | chr1_14308406 | trans | -0,73±0,11 | 2,71E-11 | 0,31 | response-to-low-sulfur-2                                                                                                                        |
| AT5G50340 | chr5_20492993 | cis   | -0,57±0,09 | 2,72E-11 | 0,31 | ATP-dependent-peptidases;nucleotide-binding;serine-type-endopeptidases;DNA-helicases;ATP-binding;damaged-DNA-binding;nucleoside-triphosphatases |
| AT3G05530 | chr3_1599235  | cis   | -0,63±0,1  | 2,74E-11 | 0,36 | regulatory-particle-triple-A-ATPase-5A                                                                                                          |
| AT2G29950 | chr2_12767693 | cis   | -0,77±0,12 | 2,74E-11 | 0,16 | ELF4-like-1                                                                                                                                     |
| AT5G47940 | chr5_19405610 | cis   | -0,59±0,09 | 2,74E-11 | 0,45 |                                                                                                                                                 |
| AT2G19670 | chr2_8500807  | cis   | 0,87±0,13  | 2,75E-11 | 0,13 | protein-arginine-methyltransferase-1A                                                                                                           |
| AT2G27760 | chr2_11823627 | cis   | -0,91±0,14 | 2,80E-11 | 0,11 | tRNAisopentenyltransferase-2                                                                                                                    |
| AT1G07660 | chr1_2378193  | cis   | 0,85±0,13  | 2,84E-11 | 0,16 | Histone-superfamily-protein                                                                                                                     |
| AT3G05140 | chr3_1438382  | cis   | -0,62±0,09 | 2,84E-11 | 0,29 | ROP-binding-protein-kinases-2                                                                                                                   |
| AT5G27780 | chr1_10304618 | trans | 0,62±0,09  | 2,86E-11 | 0,31 | SAUR-like-auxin-responsive-protein-family-                                                                                                      |
| AT4G22280 | chr4_11781527 | cis   | -0,62±0,09 | 2,91E-11 | 0,33 | F-box/RNI-like-superfamily-protein                                                                                                              |
| AT3G45430 | chr3_16668483 | cis   | -0,67±0,1  | 2,93E-11 | 0,22 | Concanavalin-A-like-lectin-protein-kinase-family-protein                                                                                        |
| AT1G23970 | chr1_8484262  | cis   | -0,6±0,09  | 2,96E-11 | 0,34 | Protein-of-unknown-function-(DUF626)                                                                                                            |
| AT1G21260 | chr1_7450625  | cis   | -0,87±0,13 | 2,96E-11 | 0,11 | transposable-element-gene                                                                                                                       |
| AT3G44840 | chr3_16380533 | cis   | 0,62±0,09  | 2,97E-11 | 0,33 | S-adenosyl-L-methionine-dependent-methyltransferases-superfamily-protein                                                                        |
| AT3G18070 | chr3_6188404  | cis   | 0,67±0,1   | 3,02E-11 | 0,27 | beta-glucosidase-43                                                                                                                             |
| AT1G76705 | chr1_28787300 | cis   | -0,69±0,1  | 3,03E-11 | 0,22 | calmodulin-binding                                                                                                                              |

|           |               |       |            |          |      |                                                                                 |
|-----------|---------------|-------|------------|----------|------|---------------------------------------------------------------------------------|
| AT3G24070 | chr3_8693279  | cis   | -0,62±0,09 | 3,07E-11 | 0,40 | Zinc-knuckle-(CCHC-type)-family-protein                                         |
| AT1G43640 | chr1_16441368 | cis   | 0,64±0,1   | 3,12E-11 | 0,19 | tubby-like-protein-5                                                            |
| AT1G62085 | chr1_22958193 | cis   | 0,8±0,12   | 3,12E-11 | 0,19 | Mitochondrial-transcription-termination-factor-family-protein                   |
| AT5G60250 | chr5_24252041 | cis   | -0,64±0,1  | 3,20E-11 | 0,27 | zinc-finger-(C3HC4-type-RING-finger)-family-protein                             |
| AT1G20270 | chr1_7012941  | cis   | 0,7±0,11   | 3,20E-11 | 0,29 | 2-oxoglutarate-(2OG)-and-Fe(II)-dependent-oxygenase-superfamily-protein         |
| AT1G03950 | chr1_1013305  | cis   | -0,61±0,09 | 3,24E-11 | 0,49 | vacuolar-protein-sorting-associated-protein-2.3                                 |
| AT3G03720 | chr3_929830   | cis   | -0,6±0,09  | 3,25E-11 | 0,44 | cationic-amino-acid-transporter-4                                               |
| AT4G29540 | chr4_14498589 | cis   | -0,82±0,12 | 3,26E-11 | 0,14 | bacterial-transferase-hexapeptide-repeat-containing-protein                     |
| AT4G31350 | chr4_15212436 | cis   | 0,58±0,09  | 3,33E-11 | 0,54 | Core-2/I-branching-beta-1,6-N-acetylglucosaminyltransferase-family-protein      |
| AT1G03430 | chr1_846368   | cis   | 0,68±0,1   | 3,34E-11 | 0,32 | histidine-containing-phosphotransfer-factor-5                                   |
| AT1G67460 | chr1_25271417 | cis   | 01,03±0,15 | 3,37E-11 | 0,07 | Minichromosome-maintenance-(MCM2/3/5)-family-protein                            |
| AT3G44850 | chr3_16377086 | cis   | -0,58±0,09 | 3,37E-11 | 0,36 | Protein-kinase-superfamily-protein                                              |
| AT5G38250 | chr5_15282333 | cis   | -0,68±0,1  | 3,38E-11 | 0,29 | Protein-kinase-family-protein                                                   |
| AT5G02230 | chr5_448353   | cis   | -0,62±0,09 | 3,45E-11 | 0,36 | Haloacid-dehalogenase-like-hydrolase-(HAD)-superfamily-protein                  |
| AT1G63860 | chr1_23699948 | cis   | -0,72±0,11 | 3,48E-11 | 0,18 | Disease-resistance-protein-(TIR-NBS-LRR-class)-family                           |
| AT3G05520 | chr3_1597217  | cis   | 0,72±0,11  | 3,49E-11 | 0,21 | Subunits-of-heterodimeric-actin-filament-capping-protein-Capz-superfamily       |
| AT1G47480 | chr1_17417234 | cis   | 0,59±0,09  | 3,49E-11 | 0,40 | alpha/beta-Hydrolases-superfamily-protein                                       |
| AT1G10350 | chr1_3394361  | cis   | -0,63±0,09 | 3,52E-11 | 0,27 | DNAJ-heat-shock-family-protein                                                  |
| AT4G10970 | chr4_6723527  | cis   | 0,58±0,09  | 3,61E-11 | 0,38 |                                                                                 |
| AT2G41160 | chr2_17158899 | cis   | 0,64±0,1   | 3,70E-11 | 0,33 | Ubiquitin-associated-(UBA)-protein                                              |
| AT5G03690 | chr5_965085   | cis   | 0,63±0,1   | 3,76E-11 | 0,31 | Aldolase-superfamily-protein                                                    |
| AT1G01670 | chr1_245885   | cis   | 0,74±0,11  | 3,85E-11 | 0,19 | RING/U-box-superfamily-protein                                                  |
| AT1G63900 | chr1_23717698 | cis   | -0,58±0,09 | 3,86E-11 | 0,54 | E3-Ubiquitin-ligase-family-protein                                              |
| AT3G08800 | chr3_2695806  | cis   | 0,76±0,12  | 3,91E-11 | 0,16 | ARM-repeat-superfamily-protein                                                  |
| AT1G43245 | chr1_16399107 | trans | -0,6±0,09  | 3,96E-11 | 0,43 | SET-domain-containing-protein                                                   |
| AT5G23570 | chr5_7938150  | cis   | -0,76±0,12 | 3,96E-11 | 0,19 | XS-domain-containing-protein-/-XS-zinc-finger-domain-containing-protein-related |
| AT1G32210 | chr1_11608838 | cis   | -0,56±0,09 | 3,97E-11 | 0,39 | Defender-against-death-(DAD-family)-protein                                     |
| AT5G45610 | chr5_18496799 | cis   | -0,59±0,09 | 4,04E-11 | 0,42 | protein-dimerizations                                                           |
| AT1G56130 | chr1_20990846 | cis   | -0,59±0,09 | 4,13E-11 | 0,49 | Leucine-rich-repeat-transmembrane-protein-kinase                                |
| AT3G49510 | chr3_18353953 | cis   | 0,85±0,13  | 4,16E-11 | 0,15 | F-box-family-protein                                                            |
| AT5G43460 | chr5_17459417 | cis   | -0,81±0,12 | 4,22E-11 | 0,15 | HR-like-lesion-inducing-protein-related                                         |
| AT5G57230 | chr5_23190534 | cis   | 0,56±0,09  | 4,25E-11 | 0,39 | Thioredoxin-superfamily-protein                                                 |
| AT3G50430 | chr3_18713181 | cis   | 0,61±0,09  | 4,25E-11 | 0,39 |                                                                                 |
| AT1G34570 | chr1_12656236 | cis   | -0,64±0,1  | 4,25E-11 | 0,27 | Essential-protein-Yae1,-N-terminal                                              |

|           |               |       |            |          |      |                                                            |
|-----------|---------------|-------|------------|----------|------|------------------------------------------------------------|
| AT3G18520 | chr3_6360408  | cis   | -0,97±0,15 | 4,28E-11 | 0,12 | histone-deacetylase-15                                     |
| AT4G38280 | chr4_17952125 | cis   | -0,81±0,12 | 4,31E-11 | 0,14 |                                                            |
| AT3G27930 | chr3_10375644 | cis   | -0,71±0,11 | 4,35E-11 | 0,22 |                                                            |
| AT1G75620 | chr1_28398064 | cis   | 0,61±0,09  | 4,44E-11 | 0,33 | glyoxal-oxidase-related-protein                            |
| AT1G37150 | chr1_14205440 | cis   | -0,6±0,09  | 4,46E-11 | 0,35 | holocarboxylase-synthetase-2                               |
| AT2G16595 | chr2_7198233  | cis   | 0,97±0,15  | 4,55E-11 | 0,10 | Translocon-associated-protein-(TRAP),-alpha-subunit        |
| AT4G08540 | chr4_5431654  | cis   | 0,66±0,1   | 4,56E-11 | 0,25 | DNA-directed-RNA-polymerase-II-protein                     |
| AT4G01883 | chr4_802185   | cis   | -0,61±0,09 | 4,61E-11 | 0,36 | Polyketide-cyclase-/-dehydrase-and-lipid-transport-protein |
| AT3G47990 | chr3_17715309 | cis   | -0,69±0,1  | 4,62E-11 | 0,22 | SUGAR-INSENSITIVE-3                                        |
| AT4G12760 | chr4_7505406  | cis   | -0,67±0,1  | 4,66E-11 | 0,21 |                                                            |
| AT5G66840 | chr5_26695453 | cis   | 0,6±0,09   | 4,66E-11 | 0,27 | SAP-domain-containing-protein                              |
| AT4G35785 | chr4_16955002 | cis   | -0,6±0,09  | 4,67E-11 | 0,32 | RNA-binding-(RRM/RBD/RNP-motifs)-family-protein            |
| AT1G24120 | chr1_8532808  | cis   | 0,65±0,1   | 4,73E-11 | 0,32 | ARG1-like-1                                                |
| AT5G22860 | chr5_7650977  | cis   | 0,64±0,1   | 4,74E-11 | 0,36 | Serine-carboxypeptidase-S28-family-protein                 |
| AT1G20225 | chr1_7008332  | cis   | 0,63±0,1   | 4,75E-11 | 0,34 | Thioredoxin-superfamily-protein                            |
| AT4G37110 | chr4_17489547 | cis   | 0,71±0,11  | 4,78E-11 | 0,19 | Zinc-finger-domain-of-monoamine-oxidase-A-repressor-R1     |
| AT1G56120 | chr1_20993126 | cis   | -0,66±0,1  | 4,79E-11 | 0,49 | Leucine-rich-repeat-transmembrane-protein-kinase           |
| AT2G42450 | chr2_17686212 | cis   | 0,6±0,09   | 4,85E-11 | 0,41 | alpha/beta-Hydrolases-superfamily-protein                  |
| AT2G02470 | chr2_655171   | cis   | -0,57±0,09 | 4,88E-11 | 0,46 | alfin-like-6                                               |
| AT3G14940 | chr3_5025461  | cis   | -0,7±0,11  | 4,89E-11 | 0,21 | phosphoenolpyruvate-carboxylase-3                          |
| AT3G03850 | chr3_981957   | cis   | -0,81±0,12 | 4,91E-11 | 0,15 | SAUR-like-auxin-responsive-protein-family-                 |
| AT5G23020 | chr5_7703372  | cis   | 0,59±0,09  | 4,97E-11 | 0,37 | 2-isopropylmalate-synthase-2                               |
| AT2G25420 | chr2_10799197 | cis   | -0,7±0,11  | 4,98E-11 | 0,41 | transducin-family-protein-/-WD-40-repeat-family-protein    |
| AT5G35430 | chr5_13662860 | cis   | 0,6±0,09   | 5,16E-11 | 0,36 | Tetratricopeptide-repeat-(TPR)-like-superfamily-protein    |
| AT1G60730 | chr1_22359534 | cis   | 0,65±0,1   | 5,26E-11 | 0,19 | NAD(P)-linked-oxidoreductase-superfamily-protein           |
| AT2G21830 | chr2_9303757  | cis   | -0,65±0,1  | 5,27E-11 | 0,36 | Cysteine/Histidine-rich-C1-domain-family-protein           |
| AT4G07810 | chr4_11390461 | trans | -0,58±0,09 | 5,29E-11 | 0,44 | transposable-element-gene                                  |
| AT3G46980 | chr3_17309471 | cis   | 0,82±0,13  | 5,33E-11 | 0,18 | phosphate-transporter-4;3                                  |
| AT1G21480 | chr1_7521814  | cis   | 0,78±0,12  | 5,35E-11 | 0,13 | Exostosin-family-protein                                   |
| AT4G07868 | chr5_24731389 | trans | 0,57±0,09  | 5,43E-11 | 0,58 |                                                            |
| AT4G39930 | chr4_18518933 | cis   | 0,67±0,1   | 5,49E-11 | 0,25 |                                                            |
| AT1G22590 | chr1_7981208  | cis   | 0,55±0,08  | 5,56E-11 | 0,47 | AGAMOUS-like-87                                            |
| AT4G12020 | chr4_7201310  | cis   | -0,93±0,14 | 5,64E-11 | 0,09 | protein-kinase-family-protein                              |
| AT1G03230 | chr1_786874   | cis   | -0,62±0,1  | 5,67E-11 | 0,41 | Eukaryotic-aspartyl-protease-family-protein                |

|           |               |       |            |          |      |                                                             |
|-----------|---------------|-------|------------|----------|------|-------------------------------------------------------------|
| AT1G51480 | chr5_17564586 | trans | 0,58±0,09  | 5,69E-11 | 0,46 | Disease-resistance-protein-(CC-NBS-LRR-class)-family        |
| AT3G16170 | chr3_5478668  | cis   | -0,83±0,13 | 5,90E-11 | 0,17 | AMP-dependent-synthetase-and-ligase-family-protein          |
| AT2G30820 | chr2_13129360 | cis   | 0,77±0,12  | 5,90E-11 | 0,16 |                                                             |
| AT2G16895 | chr2_7319981  | cis   | 0,57±0,09  | 5,95E-11 | 0,51 |                                                             |
| AT5G23390 | chr5_7870343  | cis   | 0,58±0,09  | 6,02E-11 | 0,41 | Plant-protein-of-unknown-function-(DUF639)                  |
| AT1G67910 | chr1_25472493 | cis   | -0,96±0,15 | 6,04E-11 | 0,11 |                                                             |
| AT4G28085 | chr4_13966410 | cis   | 0,67±0,1   | 6,09E-11 | 0,24 |                                                             |
| AT5G40820 | chr5_16363727 | cis   | 0,75±0,11  | 6,30E-11 | 0,19 | Ataxia-telangiectasia-mutated-and-RAD3-related              |
| AT2G22482 | chr3_129672   | trans | -0,85±0,13 | 6,31E-11 | 0,14 |                                                             |
| AT4G07950 | chr4_4800152  | cis   | -0,61±0,09 | 6,34E-11 | 0,39 | DNA-directed-RNA-polymerase,-subunit-M,-archaeal            |
| AT1G26530 | chr1_9166436  | cis   | -0,85±0,13 | 6,39E-11 | 0,13 | PIN-domain-like-family-protein                              |
| AT1G32310 | chr1_11653587 | cis   | 0,58±0,09  | 6,43E-11 | 0,31 |                                                             |
| AT5G38280 | chr5_15292221 | cis   | -0,57±0,09 | 6,43E-11 | 0,34 | PR5-like-receptor-kinase                                    |
| AT5G47760 | chr5_19342075 | cis   | 0,57±0,09  | 6,44E-11 | 0,46 | 2-phosphoglycolate-phosphatase-2                            |
| AT4G31870 | chr4_15409973 | cis   | -0,66±0,1  | 6,45E-11 | 0,31 | glutathione-peroxidase-7                                    |
| AT1G65700 | chr1_24435496 | cis   | -0,79±0,12 | 6,46E-11 | 0,16 | Small-nuclear-ribonucleoprotein-family-protein              |
| AT4G19460 | chr4_10610785 | cis   | -0,58±0,09 | 6,46E-11 | 0,36 | UDP-Glycosyltransferase-superfamily-protein                 |
| AT4G07950 | chr4_3904715  | trans | -0,9±0,14  | 6,47E-11 | 0,12 | DNA-directed-RNA-polymerase,-subunit-M,-archaeal            |
| AT1G24340 | chr1_8635114  | cis   | 0,81±0,12  | 6,56E-11 | 0,19 | FAD/NAD(P)-binding-oxidoreductase-family-protein            |
| AT1G65130 | chr1_24197451 | cis   | -0,89±0,14 | 6,57E-11 | 0,11 | Ubiquitin-carboxyl-terminal-hydrolase-related-protein       |
| AT4G09420 | chr4_5932389  | cis   | -0,78±0,12 | 6,60E-11 | 0,16 | Disease-resistance-protein-(TIR-NBS-class)                  |
| AT3G44120 | chr3_15875158 | cis   | 0,59±0,09  | 6,61E-11 | 0,34 | F-box-and-associated-interaction-domains-containing-protein |
| AT5G45475 | chr5_18424570 | cis   | -0,84±0,13 | 6,63E-11 | 0,14 |                                                             |
| AT4G01880 | chr4_812373   | cis   | -0,72±0,11 | 6,65E-11 | 0,21 | methyltransferases                                          |
| AT3G53210 | chr3_19720549 | cis   | 0,67±0,1   | 6,67E-11 | 0,23 | nodulin-MtN21-/EamA-like-transporter-family-protein         |
| AT2G44360 | chr2_18321698 | cis   | 0,58±0,09  | 6,97E-11 | 0,53 |                                                             |
| AT1G48240 | chr1_17811939 | cis   | 0,63±0,1   | 6,98E-11 | 0,31 | novel-plant-snare-12                                        |
| AT5G23380 | chr5_7868418  | cis   | -0,57±0,09 | 7,02E-11 | 0,44 | Protein-of-unknown-function-(DUF789)                        |
| AT1G29960 | chr1_10496204 | cis   | 0,58±0,09  | 7,06E-11 | 0,49 | Peptidase-S24/S26A/S26B/S26C-family-protein                 |
| AT3G58940 | chr3_21783678 | cis   | 0,97±0,15  | 7,07E-11 | 0,11 | F-box/RNI-like-superfamily-protein                          |
| AT1G25210 | chr1_8842441  | cis   | 0,91±0,14  | 7,10E-11 | 0,12 | UDP-3-O-acyl-N-acetylglycosamine-deacetylase-family-protein |
| AT2G27330 | chr2_11695193 | cis   | 0,65±0,1   | 7,23E-11 | 0,35 | RNA-binding-(RRM/RBD/RNP-motifs)-family-protein             |
| AT2G36590 | chr2_15345697 | cis   | -0,75±0,11 | 7,33E-11 | 0,21 | proline-transporter-3                                       |
| AT5G36940 | chr5_14590286 | cis   | -0,62±0,1  | 7,41E-11 | 0,35 | cationic-amino-acid-transporter-3                           |

|           |               |       |            |          |      |                                                                            |
|-----------|---------------|-------|------------|----------|------|----------------------------------------------------------------------------|
| AT2G28560 | chr2_12237067 | cis   | 01,02±0,16 | 7,66E-11 | 0,08 | DNA-repair-(Rad51)-family-protein                                          |
| AT1G65080 | chr1_24176095 | cis   | 0,56±0,09  | 7,71E-11 | 0,49 | Membrane-insertion-protein,-OxaA/YidC-with-tetratricopeptide-repeat-domain |
| AT2G31250 | chr2_13321609 | cis   | 0,68±0,1   | 7,84E-11 | 0,22 | Glutamyl-tRNA-reductase-family-protein                                     |
| AT5G24660 | chr1_15491836 | trans | -0,71±0,11 | 8,04E-11 | 0,32 | response-to-low-sulfur-2                                                   |
| AT1G44910 | chr1_16971689 | cis   | -0,6±0,09  | 8,21E-11 | 0,34 | pre-mRNA-processing-protein-40A                                            |
| AT4G36515 | chr4_17226130 | cis   | -0,86±0,13 | 8,25E-11 | 0,11 |                                                                            |
| AT1G15280 | chr1_5249719  | cis   | 0,6±0,09   | 8,34E-11 | 0,46 | CASC3/Barentsz-eIF4AIII-binding                                            |
| AT5G48670 | chr5_19739149 | cis   | -0,72±0,11 | 8,47E-11 | 0,20 | AGAMOUS-like-80                                                            |
| AT2G02880 | chr2_841410   | cis   | 0,59±0,09  | 8,62E-11 | 0,29 | mucin-related                                                              |
| AT5G03250 | chr5_774497   | cis   | -0,57±0,09 | 8,63E-11 | 0,49 | Phototropic-responsive-NPH3-family-protein                                 |
| AT4G23290 | chr4_12184127 | cis   | -0,81±0,12 | 8,68E-11 | 0,14 | cysteine-rich-RLK-(RECEPTOR-like-protein-kinase)-21                        |
| AT4G02430 | chr4_1075423  | cis   | -0,61±0,09 | 8,70E-11 | 0,36 | RNA-binding-(RRM/RBD/RNP-motifs)-family-protein                            |
| AT5G03285 | chr5_793000   | cis   | -0,6±0,09  | 8,90E-11 | 0,40 | other-RNA                                                                  |
| AT3G26380 | chr3_9662059  | cis   | -0,81±0,13 | 8,91E-11 | 0,16 | Melibiose-family-protein                                                   |
| AT2G41830 | chr2_17458181 | cis   | 0,88±0,14  | 8,92E-11 | 0,17 | Uncharacterized-protein                                                    |
| AT1G14040 | chr1_4790675  | cis   | -0,56±0,09 | 9,03E-11 | 0,43 | EXS-(ERD1/XPR1/SYG1)-family-protein                                        |
| AT2G21130 | chr2_9056486  | cis   | 0,59±0,09  | 9,06E-11 | 0,42 | Cyclophilin-like-peptidyl-prolyl-cis-trans-isomerase-family-protein        |
| AT5G26240 | chr5_9190048  | cis   | 0,58±0,09  | 9,08E-11 | 0,35 | chloride-channel-D                                                         |
| AT3G02790 | chr3_616719   | cis   | -0,91±0,14 | 9,18E-11 | 0,11 | zinc-finger-(C2H2-type)-family-protein                                     |
| AT1G52290 | chr1_19471163 | cis   | -0,59±0,09 | 9,27E-11 | 0,39 | Protein-kinase-superfamily-protein                                         |
| AT3G54160 | chr3_20053329 | cis   | 0,58±0,09  | 9,34E-11 | 0,34 | RNI-like-superfamily-protein                                               |
| AT1G05350 | chr1_1562537  | cis   | 0,6±0,09   | 9,43E-11 | 0,41 | NAD(P)-binding-Rossmann-fold-superfamily-protein                           |
| AT2G45510 | chr2_18755446 | cis   | 0,57±0,09  | 9,61E-11 | 0,46 | cytochrome-P450,-family-704,-subfamily-A,-polypeptide-2                    |
| AT5G10610 | chr5_3355152  | cis   | 0,76±0,12  | 9,71E-11 | 0,16 | cytochrome-P450,-family-81,-subfamily-K,-polypeptide-1                     |
| AT3G27860 | chr3_10325509 | cis   | 0,91±0,14  | 1,02E-10 | 0,10 | Tudor/PWWP/MBT-superfamily-protein                                         |
| AT4G36420 | chr4_17202791 | cis   | 0,67±0,1   | 1,03E-10 | 0,22 | Ribosomal-protein-L12-family-protein                                       |
| AT1G65070 | chr1_24174627 | cis   | 0,59±0,09  | 1,04E-10 | 0,34 | DNA-mismatch-repair-protein-MutS,-type-2                                   |
| AT4G18400 | chr4_10169909 | cis   | -0,57±0,09 | 1,05E-10 | 0,39 |                                                                            |
| AT4G19560 | chr4_10661099 | cis   | 0,56±0,09  | 1,07E-10 | 0,48 | Cyclin-family-protein                                                      |
| AT4G31990 | chr4_15471552 | cis   | -0,78±0,12 | 1,07E-10 | 0,17 | aspartate-aminotransferase-5                                               |
| AT2G17320 | chr2_7534189  | cis   | 0,73±0,11  | 1,08E-10 | 0,21 | Uncharacterised-conserved-protein-(UCP030210)                              |
| AT1G48605 | chr1_17968019 | cis   | 0,94±0,15  | 1,08E-10 | 0,09 | Flavoprotein                                                               |
| AT3G30875 | chr1_15752864 | trans | 0,58±0,09  | 1,09E-10 | 0,45 |                                                                            |
| AT3G43340 | chr3_15284517 | cis   | 0,6±0,09   | 1,11E-10 | 0,40 | Pseudouridine-synthase-family-protein                                      |



|           |               |       |            |          |      |                                                                          |
|-----------|---------------|-------|------------|----------|------|--------------------------------------------------------------------------|
| AT3G03330 | chr3_788485   | cis   | 0,66±0,1   | 1,12E-10 | 0,34 | NAD(P)-binding-Rossmann-fold-superfamily-protein                         |
| AT1G05030 | chr1_1438483  | cis   | -0,57±0,09 | 1,13E-10 | 0,36 | Major-facilitator-superfamily-protein                                    |
| AT1G72200 | chr1_27172376 | cis   | 0,66±0,1   | 1,15E-10 | 0,22 | RING/U-box-superfamily-protein                                           |
| AT2G25270 | chr2_10759702 | cis   | -0,62±0,1  | 1,15E-10 | 0,36 |                                                                          |
| AT5G41690 | chr5_16675076 | cis   | -0,61±0,09 | 1,18E-10 | 0,27 | RNA-binding-(RRM/RBD/RNP-motifs)-family-protein                          |
| AT1G60620 | chr1_22329166 | cis   | 0,67±0,1   | 1,19E-10 | 0,21 | RNA-polymerase-I-subunit-43                                              |
| AT5G51640 | chr5_20975731 | cis   | -0,59±0,09 | 1,19E-10 | 0,34 | Plant-protein-of-unknown-function-(DUF828)                               |
| AT2G29370 | chr2_12605976 | cis   | 0,86±0,13  | 1,19E-10 | 0,13 | NAD(P)-binding-Rossmann-fold-superfamily-protein                         |
| AT3G28900 | chr3_10900646 | cis   | -0,59±0,09 | 1,21E-10 | 0,31 | Ribosomal-protein-L34e-superfamily-protein                               |
| AT4G15260 | chr4_8717138  | cis   | 0,66±0,1   | 1,22E-10 | 0,23 | UDP-Glycosyltransferase-superfamily-protein                              |
| AT5G53970 | chr5_21911490 | cis   | -0,6±0,09  | 1,23E-10 | 0,30 | Tyrosine-transaminase-family-protein                                     |
| AT2G32940 | chr2_13973428 | cis   | -0,62±0,1  | 1,24E-10 | 0,39 | Argonaute-family-protein                                                 |
| AT5G60340 | chr5_24275857 | cis   | -0,65±0,1  | 1,24E-10 | 0,29 | P-loop-containing-nucleoside-triphosphate-hydrolases-superfamily-protein |
| AT5G64630 | chr5_25833185 | cis   | 0,78±0,12  | 1,25E-10 | 0,16 | Transducin/WD40-repeat-like-superfamily-protein                          |
| AT4G19540 | chr4_10657339 | cis   | 0,62±0,1   | 1,25E-10 | 0,29 | IND1(iron-sulfur-protein-required-for-NADH-dehydrogenase)-like           |
| AT1G04425 | chr1_1194246  | cis   | 0,58±0,09  | 1,27E-10 | 0,40 | other-RNA                                                                |
| AT2G43280 | chr2_17989969 | cis   | -0,71±0,11 | 1,29E-10 | 0,21 | Far-red-impaired-responsive-(FAR1)-family-protein                        |
| AT5G22840 | chr5_7627056  | cis   | -0,73±0,11 | 1,29E-10 | 0,24 | Protein-kinase-superfamily-protein                                       |
| AT4G13885 | chr4_8028708  | cis   | -0,64±0,1  | 1,29E-10 | 0,24 | Polynucleotidyl-transferase,-ribonuclease-H-like-superfamily-protein     |
| AT1G08640 | chr1_2749318  | cis   | -0,75±0,12 | 1,31E-10 | 0,24 | Chloroplast-J-like-domain-1                                              |
| AT3G19860 | chr3_6910797  | cis   | 0,64±0,1   | 1,32E-10 | 0,26 | basic-helix-loop-helix-(bHLH)-DNA-binding-superfamily-protein            |
| AT5G28897 | chr3_9723545  | trans | 0,58±0,09  | 1,33E-10 | 0,31 |                                                                          |
| AT1G62820 | chr1_23263842 | cis   | 0,79±0,12  | 1,35E-10 | 0,14 | Calcium-binding-EF-hand-family-protein                                   |
| AT1G12550 | chr1_4275390  | cis   | -0,6±0,09  | 1,38E-10 | 0,41 | D-isomer-specific-2-hydroxyacid-dehydrogenase-family-protein             |
| AT3G62890 | chr3_23246117 | cis   | 0,57±0,09  | 1,42E-10 | 0,41 | Pentatricopeptide-repeat-(PPR)-superfamily-protein                       |
| AT1G27560 | chr2_4222984  | trans | 0,64±0,1   | 1,43E-10 | 0,23 |                                                                          |
| AT4G26555 | chr4_13407581 | cis   | -0,84±0,13 | 1,44E-10 | 0,14 | FKBP-like-peptidyl-prolyl-cis-trans-isomerase-family-protein             |
| AT2G25590 | chr2_10886589 | cis   | -0,59±0,09 | 1,46E-10 | 0,44 | Plant-Tudor-like-protein                                                 |
| AT4G27070 | chr4_13588063 | cis   | 0,61±0,09  | 1,47E-10 | 0,29 | tryptophan-synthase-beta-subunit-2                                       |
| AT4G22285 | chr4_11781726 | cis   | 0,58±0,09  | 1,49E-10 | 0,37 | Ubiquitin-C-terminal-hydrolases-superfamily-protein                      |
| AT4G02730 | chr4_1207780  | cis   | -0,61±0,1  | 1,50E-10 | 0,36 | Transducin/WD40-repeat-like-superfamily-protein                          |
| AT5G22530 | chr5_7480836  | cis   | 0,59±0,09  | 1,51E-10 | 0,41 |                                                                          |
| AT3G54910 | chr3_20342213 | cis   | -0,63±0,1  | 1,53E-10 | 0,23 | RNI-like-superfamily-protein                                             |
| AT1G61960 | chr1_22903135 | cis   | -0,88±0,14 | 1,54E-10 | 0,11 | Mitochondrial-transcription-termination-factor-family-protein            |

|           |               |       |            |          |      |                                                                          |
|-----------|---------------|-------|------------|----------|------|--------------------------------------------------------------------------|
| AT1G11270 | chr1_3790577  | cis   | 01,06±0,17 | 1,54E-10 | 0,08 | F-box-and-associated-interaction-domains-containing-protein              |
| AT1G35320 | chr1_12957347 | cis   | -0,65±0,1  | 1,55E-10 | 0,23 |                                                                          |
| AT1G78750 | chr1_29614181 | cis   | -0,66±0,1  | 1,59E-10 | 0,21 | F-box/RNI-like-superfamily-protein                                       |
| AT4G20400 | chr4_11015485 | cis   | -0,54±0,09 | 1,60E-10 | 0,44 | JUMONJI-14                                                               |
| AT5G53920 | chr5_21892406 | cis   | -0,74±0,12 | 1,61E-10 | 0,16 | ribosomal-protein-L11-methyltransferase-related                          |
| AT1G52590 | chr1_19588597 | cis   | 0,55±0,09  | 1,61E-10 | 0,48 | Putative-thiol-disulphide-oxidoreductase-DCC                             |
| AT3G24340 | chr3_8837356  | cis   | 0,57±0,09  | 1,62E-10 | 0,37 | chromatin-remodeling-40                                                  |
| AT1G23360 | chr1_8296501  | cis   | 0,6±0,09   | 1,63E-10 | 0,34 | S-adenosyl-L-methionine-dependent-methyltransferases-superfamily-protein |
| AT1G29500 | chr1_10315428 | cis   | -0,73±0,11 | 1,64E-10 | 0,17 | SAUR-like-auxin-responsive-protein-family-                               |
| AT1G32540 | chr1_11770333 | cis   | -0,58±0,09 | 1,67E-10 | 0,31 | lsd-one-like-1                                                           |
| AT3G26100 | chr3_9537065  | cis   | -0,79±0,12 | 1,68E-10 | 0,16 | Regulator-of-chromosome-condensation-(RCC1)-family-protein               |
| AT2G22970 | chr2_9774878  | cis   | -0,65±0,1  | 1,69E-10 | 0,24 | serine-carboxypeptidase-like-11                                          |
| AT1G63350 | chr1_23494652 | cis   | -0,57±0,09 | 1,76E-10 | 0,36 | Disease-resistance-protein-(CC-NBS-LRR-class)-family                     |
| AT2G43490 | chr2_18053906 | cis   | -0,55±0,09 | 1,77E-10 | 0,43 | Ypt/Rab-GAP-domain-of-gyp1p-superfamily-protein                          |
| AT1G34210 | chr1_12459119 | cis   | -0,69±0,11 | 1,78E-10 | 0,20 | somatic-embryogenesis-receptor-like-kinase-2                             |
| AT3G07200 | chr3_2290749  | cis   | -0,58±0,09 | 1,79E-10 | 0,48 | RING/U-box-superfamily-protein                                           |
| AT2G23620 | chr2_10047637 | cis   | 0,59±0,09  | 1,79E-10 | 0,33 | methyl-esterase-1                                                        |
| AT5G12980 | chr2_1833581  | trans | -0,56±0,09 | 1,80E-10 | 0,37 | Cell-differentiation,-Rcd1-like-protein                                  |
| AT4G33370 | chr4_16070698 | cis   | 0,62±0,1   | 1,81E-10 | 0,28 | DEA(D/H)-box-RNA-helicase-family-protein                                 |
| AT5G45260 | chr5_18327098 | cis   | -0,58±0,09 | 1,81E-10 | 0,36 | Disease-resistance-protein-(TIR-NBS-LRR-class)                           |
| AT3G23740 | chr3_8555055  | cis   | -0,7±0,11  | 1,83E-10 | 0,19 |                                                                          |
| AT4G11150 | chr4_6801368  | cis   | 0,57±0,09  | 1,86E-10 | 0,46 | vacuolar-ATP-synthase-subunit-E1                                         |
| AT1G11240 | chr1_3764300  | cis   | -0,85±0,13 | 1,87E-10 | 0,14 |                                                                          |
| AT5G01180 | chr5_45229    | cis   | -0,87±0,14 | 1,87E-10 | 0,14 | peptide-transporter--5                                                   |
| AT2G28070 | chr2_11958613 | cis   | -0,69±0,11 | 1,90E-10 | 0,24 | ABC-2-type-transporter-family-protein                                    |
| AT1G58300 | chr1_21628676 | cis   | -0,58±0,09 | 1,91E-10 | 0,39 | heme-oxygenase-4                                                         |
| AT5G03350 | chr5_816975   | cis   | -0,68±0,11 | 1,91E-10 | 0,27 | Legume-lectin-family-protein                                             |
| AT3G14710 | chr3_4939889  | cis   | 0,6±0,09   | 1,94E-10 | 0,32 | RNI-like-superfamily-protein                                             |
| AT1G73860 | chr1_27777739 | cis   | 0,56±0,09  | 1,97E-10 | 0,49 | P-loop-containing-nucleoside-triphosphate-hydrolases-superfamily-protein |
| AT4G07410 | chr3_13806264 | trans | 0,68±0,11  | 1,98E-10 | 0,30 | Transducin-family-protein/-WD-40-repeat-family-protein                   |
| AT4G05390 | chr4_2738807  | cis   | 0,58±0,09  | 1,98E-10 | 0,36 | root-FNR-1                                                               |
| AT5G52420 | chr5_21282509 | cis   | 0,61±0,1   | 2,00E-10 | 0,45 |                                                                          |
| AT3G03970 | chr3_1030187  | cis   | -0,88±0,14 | 2,01E-10 | 0,09 | ARM-repeat-superfamily-protein                                           |
| AT1G61620 | chr1_22739696 | cis   | -0,51±0,08 | 2,01E-10 | 0,42 | phosphoinositide-binding                                                 |

|           |               |       |            |          |      |                                                                                          |
|-----------|---------------|-------|------------|----------|------|------------------------------------------------------------------------------------------|
| AT1G28640 | chr1_10077576 | cis   | 0,68±0,11  | 2,07E-10 | 0,20 | GDSL-like-Lipase/Acylhydrolase-superfamily-protein                                       |
| AT1G12160 | chr1_4126364  | cis   | 0,93±0,15  | 2,07E-10 | 0,09 | Flavin-binding-monooxygenase-family-protein                                              |
| AT3G09960 | chr3_3061969  | cis   | 0,93±0,15  | 2,13E-10 | 0,11 | Calcineurin-like-metallo-phosphoesterase-superfamily-protein                             |
| AT4G27080 | chr1_11505353 | trans | 0,7±0,11   | 2,14E-10 | 0,23 | PDI-like-5-4                                                                             |
| AT4G10420 | chr4_6453774  | cis   | 0,54±0,09  | 2,16E-10 | 0,39 | FBD-/-Leucine-Rich-Repeat-domains-containing-protein                                     |
| AT4G15165 | chr4_8649777  | cis   | 0,8±0,13   | 2,16E-10 | 0,12 | N-terminal-nucleophile-aminohydrolases-(Ntn-hydrolases)-superfamily-protein              |
| AT3G30875 | chr3_13158367 | trans | 0,64±0,1   | 2,23E-10 | 0,32 |                                                                                          |
| AT5G23890 | chr5_8050126  | cis   | 0,77±0,12  | 2,26E-10 | 0,16 |                                                                                          |
| AT5G57880 | chr5_23449524 | cis   | 0,68±0,11  | 2,30E-10 | 0,21 | multipolar-spindle-1                                                                     |
| AT4G12010 | chr4_7199993  | cis   | -0,55±0,09 | 2,34E-10 | 0,40 | Disease-resistance-protein-(TIR-NBS-LRR-class)-family                                    |
| AT4G21326 | chr4_11346540 | cis   | 0,78±0,12  | 2,37E-10 | 0,14 | subtilase-3.12                                                                           |
| AT5G27660 | chr5_9792918  | cis   | -0,53±0,08 | 2,39E-10 | 0,49 | Trypsin-family-protein-with-PDZ-domain                                                   |
| AT4G19060 | chr4_10447444 | cis   | -0,6±0,09  | 2,39E-10 | 0,36 | P-loop-containing-nucleoside-triphosphate-hydrolases-superfamily-protein                 |
| AT1G33060 | chr1_11985485 | cis   | -0,64±0,1  | 2,40E-10 | 0,26 | NAC-014                                                                                  |
| AT4G39925 | chr4_18518933 | cis   | 0,64±0,1   | 2,44E-10 | 0,25 | AT-hook-motif-DNA-binding-family-protein                                                 |
| AT2G27360 | chr2_11705507 | cis   | 0,63±0,1   | 2,44E-10 | 0,60 | GDSL-like-Lipase/Acylhydrolase-superfamily-protein                                       |
| AT1G56510 | chr1_21171909 | cis   | -0,64±0,1  | 2,46E-10 | 0,23 | Disease-resistance-protein-(TIR-NBS-LRR-class)                                           |
| AT1G72020 | chr1_27110298 | cis   | 0,55±0,09  | 2,52E-10 | 0,46 |                                                                                          |
| AT3G52670 | chr3_19526591 | cis   | -0,61±0,1  | 2,52E-10 | 0,32 | FBD,-F-box,-Skp2-like-and-Leucine-Rich-Repeat-domains-containing-protein                 |
| AT4G15270 | chr4_8717696  | cis   | -0,54±0,09 | 2,55E-10 | 0,51 | glucosyltransferase-related                                                              |
| AT1G12013 | chr1_4057189  | cis   | -0,55±0,09 | 2,57E-10 | 0,45 | SNOR111;-snoRNA                                                                          |
| AT1G20600 | chr1_7122124  | cis   | 0,74±0,12  | 2,59E-10 | 0,19 | AP2/B3-like-transcriptional-factor-family-protein                                        |
| AT4G29860 | chr4_14605507 | cis   | -0,77±0,12 | 2,59E-10 | 0,16 | Transducin/WD40-repeat-like-superfamily-protein                                          |
| AT3G06470 | chr3_1984116  | cis   | 0,73±0,11  | 2,63E-10 | 0,19 | GNS1/SUR4-membrane-protein-family                                                        |
| AT4G10955 | chr4_6715832  | cis   | 0,6±0,1    | 2,66E-10 | 0,30 | alpha/beta-Hydrolases-superfamily-protein                                                |
| AT5G44230 | chr5_17819248 | cis   | 0,55±0,09  | 2,66E-10 | 0,55 | Pentatricopeptide-repeat-(PPR)-superfamily-protein                                       |
| AT2G42240 | chr2_17590200 | cis   | 0,77±0,12  | 2,71E-10 | 0,18 | RNA-binding-(RRM/RBD/RNP-motifs)-family-protein                                          |
| AT3G60300 | chr3_22281512 | cis   | -0,84±0,13 | 2,71E-10 | 0,11 | RWD-domain-containing-protein                                                            |
| AT2G05140 | chr2_15808355 | trans | 0,56±0,09  | 2,76E-10 | 0,44 | phosphoribosylaminoimidazole-carboxylase-family-protein-/-AIR-carboxylase-family-protein |
| AT1G65950 | chr1_24551091 | cis   | 0,59±0,09  | 2,81E-10 | 0,37 | Protein-kinase-superfamily-protein                                                       |
| AT2G24010 | chr2_10216288 | cis   | -0,56±0,09 | 2,81E-10 | 0,48 | serine-carboxypeptidase-like-23                                                          |
| AT4G18230 | chr4_10080045 | cis   | 0,72±0,11  | 2,85E-10 | 0,18 |                                                                                          |
| AT3G58020 | chr3_21479339 | cis   | -0,55±0,09 | 2,88E-10 | 0,43 | Chaperone-DnaJ-domain-superfamily-protein                                                |
| AT1G65260 | chr1_24237544 | cis   | 0,55±0,09  | 2,89E-10 | 0,44 | plastid-transcriptionally-active-4                                                       |

|           |               |       |            |          |      |                                                                          |
|-----------|---------------|-------|------------|----------|------|--------------------------------------------------------------------------|
| AT2G40290 | chr2_16836053 | cis   | -0,58±0,09 | 2,90E-10 | 0,29 | Eukaryotic-translation-initiation-factor-2-subunit-1                     |
| AT3G45890 | chr3_16877300 | cis   | 0,61±0,1   | 2,90E-10 | 0,27 | Protein-of-unknown-function,-DUF647                                      |
| AT2G39910 | chr2_16660660 | cis   | 0,74±0,12  | 3,01E-10 | 0,18 | ARM-repeat-superfamily-protein                                           |
| AT5G17680 | chr5_5819976  | cis   | 0,55±0,09  | 3,04E-10 | 0,35 | disease-resistance-protein-(TIR-NBS-LRR-class),-putative                 |
| AT2G44280 | chr2_18293820 | cis   | -0,57±0,09 | 3,06E-10 | 0,34 | Major-facilitator-superfamily-protein                                    |
| AT5G04000 | chr5_1080007  | cis   | 0,85±0,13  | 3,08E-10 | 0,12 |                                                                          |
| AT4G00880 | chr4_271105   | trans | 0,66±0,1   | 3,09E-10 | 0,35 | SAUR-like-auxin-responsive-protein-family-                               |
| AT1G69540 | chr1_26147426 | cis   | 0,73±0,12  | 3,12E-10 | 0,16 | AGAMOUS-like-94                                                          |
| AT1G31600 | chr1_11314592 | cis   | 0,52±0,08  | 3,15E-10 | 0,52 | RNA-binding-(RRM/RBD/RNP-motifs)-family-protein                          |
| AT1G30550 | chr1_10820932 | cis   | 0,66±0,11  | 3,16E-10 | 0,21 | S-adenosyl-L-methionine-dependent-methyltransferases-superfamily-protein |
| AT5G24155 | chr5_8176641  | cis   | -0,69±0,11 | 3,17E-10 | 0,19 | FAD/NAD(P)-binding-oxidoreductase-family-protein                         |
| AT1G80560 | chr1_30287050 | cis   | -0,57±0,09 | 3,17E-10 | 0,36 | isopropylmalate-dehydrogenase-2                                          |
| AT4G14900 | chr4_8522304  | cis   | 0,56±0,09  | 3,27E-10 | 0,33 | FRIGIDA-like-protein                                                     |
| AT4G33700 | chr4_16177030 | cis   | 0,82±0,13  | 3,36E-10 | 0,14 | CBS-domain-containing-protein-with-a-domain-of-unknown-function-(DUF21)  |
| AT5G17780 | chr5_5868804  | cis   | 0,6±0,1    | 3,38E-10 | 0,31 | alpha/beta-Hydrolases-superfamily-protein                                |
| AT3G32920 | chr3_12934421 | trans | 0,86±0,14  | 3,38E-10 | 0,13 | P-loop-containing-nucleoside-triphosphate-hydrolases-superfamily-protein |
| AT4G39390 | chr4_18316245 | cis   | 0,58±0,09  | 3,38E-10 | 0,35 | nucleotide-sugar-transporter-KT-1                                        |
| AT3G48680 | chr3_18034930 | cis   | -0,62±0,1  | 3,39E-10 | 0,30 | gamma-carbonic-anhydrase-like-2                                          |
| AT5G55840 | chr5_22597960 | cis   | -0,72±0,11 | 3,40E-10 | 0,16 | Pentatricopeptide-repeat-(PPR)-superfamily-protein                       |
| AT3G07580 | chr3_2433900  | cis   | -0,69±0,11 | 3,41E-10 | 0,21 |                                                                          |
| AT2G32910 | chr2_13959650 | cis   | 0,91±0,14  | 3,44E-10 | 0,11 | DCD-(Development-and-Cell-Death)-domain-protein                          |
| AT4G27540 | chr4_13753849 | cis   | -0,92±0,15 | 3,46E-10 | 0,09 | prenylated-RAB-acceptor-1.H                                              |
| AT1G05200 | chr1_1505613  | cis   | 0,61±0,1   | 3,47E-10 | 0,26 | glutamate-receptor-3.4                                                   |
| AT3G59190 | chr3_21877104 | cis   | -0,92±0,15 | 3,47E-10 | 0,12 | F-box/RNI-like-superfamily-protein                                       |
| AT5G28010 | chr5_10032888 | cis   | -0,55±0,09 | 3,50E-10 | 0,35 | Polyketide-cyclase/dehydrase-and-lipid-transport-superfamily-protein     |
| AT3G08920 | chr3_2711620  | cis   | 0,55±0,09  | 3,55E-10 | 0,40 | Rhodanese/Cell-cycle-control-phosphatase-superfamily-protein             |
| AT5G01595 | chr5_221671   | cis   | 0,56±0,09  | 3,65E-10 | 0,54 | other-RNA                                                                |
| AT5G59720 | chr5_24034956 | cis   | -0,7±0,11  | 3,72E-10 | 0,19 | heat-shock-protein-18.2                                                  |
| AT5G24660 | chr5_8443580  | cis   | -0,69±0,11 | 3,81E-10 | 0,29 | response-to-low-sulfur-2                                                 |
| AT1G52550 | chr1_19573429 | cis   | 0,65±0,1   | 3,85E-10 | 0,23 |                                                                          |
| AT1G48400 | chr1_17882506 | cis   | 0,53±0,08  | 3,88E-10 | 0,49 | F-box/RNI-like/FBD-like-domains-containing-protein                       |
| AT1G25380 | chr1_8904072  | cis   | -0,61±0,1  | 3,99E-10 | 0,26 | NAD+-transporter-2                                                       |
| AT4G31110 | chr4_15127463 | cis   | -0,75±0,12 | 4,01E-10 | 0,15 | Wall-associated-kinase-family-protein                                    |
| AT2G41340 | chr2_17235505 | cis   | -0,61±0,1  | 4,04E-10 | 0,30 | RNA-polymerase-II-fifth-largest-subunit,-D                               |

|           |               |       |            |          |      |                                                                              |
|-----------|---------------|-------|------------|----------|------|------------------------------------------------------------------------------|
| AT1G64970 | chr1_24135673 | cis   | -0,57±0,09 | 4,14E-10 | 0,48 | gamma-tocopherol-methyltransferase                                           |
| AT5G59600 | chr5_24012782 | cis   | -0,59±0,09 | 4,14E-10 | 0,33 | Tetratricopeptide-repeat-(TPR)-like-superfamily-protein                      |
| AT3G07300 | chr3_2327628  | cis   | 0,55±0,09  | 4,15E-10 | 0,50 | NagB/RpiA/CoA-transferase-like-superfamily-protein                           |
| AT4G16570 | chr4_9336847  | cis   | 0,66±0,11  | 4,18E-10 | 0,23 | protein-arginine-methyltransferase-7                                         |
| AT5G24150 | chr5_8180451  | cis   | 0,77±0,12  | 4,18E-10 | 0,14 | FAD/NAD(P)-binding-oxidoreductase-family-protein                             |
| AT3G56990 | chr3_21087135 | cis   | -0,68±0,11 | 4,19E-10 | 0,21 | embryo-sac-development-arrest-7                                              |
| AT1G37150 | chr1_14893683 | trans | -0,6±0,1   | 4,21E-10 | 0,40 | holocarboxylase-synthetase-2                                                 |
| AT1G78940 | chr1_29684120 | cis   | 0,76±0,12  | 4,23E-10 | 0,14 | Protein-kinase-protein-with-adenine-nucleotide-alpha-hydrolases-like-domain  |
| AT5G50940 | chr5_20724966 | cis   | -0,61±0,1  | 4,29E-10 | 0,34 | RNA-binding-KH-domain-containing-protein                                     |
| AT1G78860 | chr1_29646578 | cis   | -0,56±0,09 | 4,30E-10 | 0,47 | D-mannose-binding-lectin-protein-with-Apple-like-carbohydrate-binding-domain |
| AT4G14630 | chr4_8390580  | cis   | -0,74±0,12 | 4,34E-10 | 0,15 | germin-like-protein-9                                                        |
| AT1G45170 | chr1_17094706 | cis   | -0,63±0,1  | 4,36E-10 | 0,28 |                                                                              |
| AT2G32340 | chr2_13732366 | cis   | -0,59±0,09 | 4,37E-10 | 0,32 | TraB-family-protein                                                          |
| AT2G38980 | chr2_16282870 | cis   | -0,56±0,09 | 4,39E-10 | 0,46 |                                                                              |
| AT2G20130 | chr2_8687834  | cis   | 0,54±0,09  | 4,39E-10 | 0,55 | like-COV-1                                                                   |
| AT1G20590 | chr1_7132765  | cis   | -0,62±0,1  | 4,40E-10 | 0,42 | Cyclin-family-protein                                                        |
| AT5G56100 | chr5_22703218 | cis   | -0,83±0,13 | 4,41E-10 | 0,11 | glycine-rich-protein-/-oleosin                                               |
| AT1G77230 | chr1_29009432 | cis   | 0,58±0,09  | 4,42E-10 | 0,47 | Tetratricopeptide-repeat-(TPR)-like-superfamily-protein                      |
| AT1G27530 | chr1_9565203  | cis   | -0,56±0,09 | 4,45E-10 | 0,41 |                                                                              |
| AT5G16790 | chr5_5523941  | cis   | 0,92±0,15  | 4,50E-10 | 0,11 | Tho-complex-subunit-7/Mft1p                                                  |
| AT4G19490 | chr4_10616870 | cis   | -0,54±0,09 | 4,51E-10 | 0,37 | VPS54                                                                        |
| AT1G68940 | chr1_25918515 | cis   | -0,79±0,13 | 4,53E-10 | 0,14 | Armadillo/beta-catenin-like-repeat-family-protein                            |
| AT1G64230 | chr1_23846006 | cis   | -0,58±0,09 | 4,54E-10 | 0,36 | ubiquitin-conjugating-enzyme-28                                              |
| AT5G54400 | chr5_22088472 | cis   | 0,57±0,09  | 4,60E-10 | 0,47 | S-adenosyl-L-methionine-dependent-methyltransferases-superfamily-protein     |
| AT4G05450 | chr4_2759845  | cis   | -0,56±0,09 | 4,62E-10 | 0,47 | mitochondrial-ferredoxin-1                                                   |
| AT5G18750 | chr5_6254423  | cis   | 0,67±0,11  | 4,81E-10 | 0,20 | DNAJ-heat-shock-N-terminal-domain-containing-protein                         |
| AT5G20420 | chr5_6887510  | cis   | -0,66±0,11 | 4,82E-10 | 0,28 | chromatin-remodeling-42                                                      |
| AT2G31530 | chr2_13436307 | cis   | -0,65±0,11 | 4,89E-10 | 0,25 | SecY-protein-transport-family-protein                                        |
| AT2G28130 | chr2_11989124 | cis   | -0,56±0,09 | 4,89E-10 | 0,39 |                                                                              |
| AT3G18870 | chr3_6508974  | cis   | -0,66±0,11 | 5,00E-10 | 0,20 | Mitochondrial-transcription-termination-factor-family-protein                |
| AT2G39100 | chr2_16312091 | cis   | 0,58±0,09  | 5,11E-10 | 0,36 | RING/U-box-superfamily-protein                                               |
| AT1G16150 | chr1_5531987  | cis   | 0,8±0,13   | 5,15E-10 | 0,13 | wall-associated-kinase-like-4                                                |
| AT1G31750 | chr1_11372296 | cis   | -0,6±0,1   | 5,19E-10 | 0,26 | proline-rich-family-protein                                                  |
| AT5G37350 | chr5_14794054 | cis   | 0,63±0,1   | 5,22E-10 | 0,22 | Serine/threonine-protein-kinase-Rio1                                         |

|           |               |     |            |          |      |                                                                                                           |
|-----------|---------------|-----|------------|----------|------|-----------------------------------------------------------------------------------------------------------|
| AT1G33490 | chr1_12172603 | cis | -0,87±0,14 | 5,23E-10 | 0,10 |                                                                                                           |
| AT1G29320 | chr1_10247985 | cis | 0,81±0,13  | 5,33E-10 | 0,13 | Transducin/WD40-repeat-like-superfamily-protein                                                           |
| AT5G42670 | chr5_17108205 | cis | 0,62±0,1   | 5,33E-10 | 0,29 | Agenet-domain-containing-protein                                                                          |
| AT3G03480 | chr3_830684   | cis | 0,59±0,09  | 5,46E-10 | 0,29 | acetyl-CoA:(Z)-3-hexen-1-ol-acetyltransferase                                                             |
| AT5G39380 | chr5_15762102 | cis | 0,56±0,09  | 5,54E-10 | 0,52 | Plant-calmodulin-binding-protein-related                                                                  |
| AT5G46500 | chr5_18853814 | cis | 0,96±0,15  | 5,55E-10 | 0,09 |                                                                                                           |
| AT4G12120 | chr4_7260781  | cis | -0,73±0,12 | 5,57E-10 | 0,16 | Sec1/munc18-like-(SM)-proteins-superfamily                                                                |
| AT1G29785 | chr1_10430531 | cis | 0,73±0,12  | 5,58E-10 | 0,19 | other-RNA                                                                                                 |
| AT4G21940 | chr4_11638383 | cis | -0,65±0,11 | 5,66E-10 | 0,21 | calcium-dependent-protein-kinase-15                                                                       |
| AT4G01600 | chr4_693151   | cis | -0,57±0,09 | 5,71E-10 | 0,36 | GRAM-domain-family-protein                                                                                |
| AT5G66080 | chr5_26424978 | cis | -0,54±0,09 | 5,71E-10 | 0,49 | Protein-phosphatase-2C-family-protein                                                                     |
| AT5G62480 | chr5_25089660 | cis | -0,6±0,1   | 5,72E-10 | 0,31 | glutathione-S-transferase-tau-9                                                                           |
| AT4G30390 | chr4_14863146 | cis | 0,68±0,11  | 5,73E-10 | 0,20 |                                                                                                           |
| AT4G16330 | chr4_9227540  | cis | -0,72±0,12 | 5,74E-10 | 0,16 | 2-oxoglutarate-(2OG)-and-Fe(II)-dependent-oxygenase-superfamily-protein                                   |
| AT2G25220 | chr2_10747302 | cis | 0,55±0,09  | 5,75E-10 | 0,46 | Protein-kinase-superfamily-protein                                                                        |
| AT4G37680 | chr4_17707596 | cis | -0,64±0,1  | 5,88E-10 | 0,24 | heptahelical-protein-4                                                                                    |
| AT1G02680 | chr1_582044   | cis | 0,59±0,1   | 5,92E-10 | 0,26 | TBP-associated-factor-13                                                                                  |
| AT5G56950 | chr5_23033330 | cis | 0,68±0,11  | 5,92E-10 | 0,22 | nucleosome-assembly-protein-1;3                                                                           |
| AT4G25780 | chr4_13099081 | cis | -0,58±0,09 | 5,93E-10 | 0,29 | CAP-(Cysteine-rich-secretory-proteins,-Antigen-5,-and-Pathogenesis-related-1-protein)-superfamily-protein |
| AT1G22500 | chr1_7957563  | cis | -0,59±0,1  | 5,95E-10 | 0,31 | RING/U-box-superfamily-protein                                                                            |
| AT2G35950 | chr2_15102717 | cis | 0,57±0,09  | 6,01E-10 | 0,30 | embryo-sac-development-arrest-12                                                                          |
| AT2G14260 | chr2_6042140  | cis | -0,79±0,13 | 6,01E-10 | 0,15 | proline-iminopeptidase                                                                                    |
| AT1G32220 | chr1_11607120 | cis | 0,56±0,09  | 6,03E-10 | 0,46 | NAD(P)-binding-Rossmann-fold-superfamily-protein                                                          |
| AT2G29440 | chr2_12622339 | cis | 0,54±0,09  | 6,06E-10 | 0,54 | glutathione-S-transferase-tau-6                                                                           |
| AT3G25060 | chr3_9128896  | cis | -0,53±0,09 | 6,08E-10 | 0,44 | Tetratricopeptide-repeat-(TPR)-like-superfamily-protein                                                   |
| AT4G09750 | chr4_6146593  | cis | -0,56±0,09 | 6,09E-10 | 0,41 | NAD(P)-binding-Rossmann-fold-superfamily-protein                                                          |
| AT5G49650 | chr5_20154335 | cis | -0,83±0,13 | 6,13E-10 | 0,11 | xylulose-kinase-2                                                                                         |
| AT5G60430 | chr5_24304209 | cis | -0,71±0,11 | 6,18E-10 | 0,18 | drug-transmembrane-transporters;antiporters                                                               |
| AT3G49410 | chr3_18329902 | cis | 0,59±0,09  | 6,22E-10 | 0,47 | Transcription-factor-IIIC,-subunit-5                                                                      |
| AT5G40700 | chr5_16293488 | cis | 0,78±0,13  | 6,27E-10 | 0,14 |                                                                                                           |
| AT5G42310 | chr5_16913465 | cis | 0,55±0,09  | 6,30E-10 | 0,41 | Pentatricopeptide-repeat-(PPR-like)-superfamily-protein                                                   |
| AT2G44290 | chr2_18290320 | cis | -0,54±0,09 | 6,36E-10 | 0,45 | Bifunctional-inhibitor/lipid-transfer-protein/seed-storage-2S-albumin-superfamily-protein                 |
| AT5G44568 | chr5_17966184 | cis | -0,57±0,09 | 6,36E-10 | 0,35 |                                                                                                           |
| AT5G19180 | chr5_6453495  | cis | -0,64±0,1  | 6,47E-10 | 0,24 | E1-C-terminal-related-1                                                                                   |

|           |               |       |            |          |      |                                                                             |
|-----------|---------------|-------|------------|----------|------|-----------------------------------------------------------------------------|
| AT3G14550 | chr3_4874896  | cis   | 0,68±0,11  | 6,52E-10 | 0,22 | geranylgeranyl-pyrophosphate-synthase-3                                     |
| AT1G63230 | chr1_23448744 | cis   | 0,56±0,09  | 6,62E-10 | 0,42 | Tetratricopeptide-repeat-(TPR)-like-superfamily-protein                     |
| AT1G71350 | chr1_26891020 | cis   | 0,63±0,1   | 6,66E-10 | 0,24 | eukaryotic-translation-initiation-factor-SUI1-family-protein                |
| AT1G05430 | chr1_1590032  | cis   | -0,79±0,13 | 6,69E-10 | 0,14 |                                                                             |
| AT3G56690 | chr3_20998587 | cis   | -0,63±0,1  | 6,75E-10 | 0,25 | Cam-interacting-protein-111                                                 |
| AT5G38030 | chr5_15174498 | cis   | -0,57±0,09 | 6,75E-10 | 0,34 | MATE-efflux-family-protein                                                  |
| AT1G11870 | chr1_4004173  | cis   | -0,57±0,09 | 6,79E-10 | 0,31 | Seryl-tRNA-synthetase                                                       |
| AT5G60410 | chr5_24292611 | cis   | 0,77±0,13  | 6,83E-10 | 0,15 | DNA-binding-protein-with-MIZ/SP-RING-zinc-finger,-PHD-finger-and-SAP-domain |
| AT1G77765 | chr1_29244015 | cis   | -0,53±0,09 | 6,90E-10 | 0,39 |                                                                             |
| AT5G05760 | chr5_1728894  | cis   | 0,55±0,09  | 7,11E-10 | 0,41 | syntaxin-of-plants-31                                                       |
| AT1G61390 | chr1_21928292 | trans | 0,72±0,12  | 7,12E-10 | 0,16 | S-locus-lectin-protein-kinase-family-protein                                |
| AT2G46440 | chr2_19092333 | cis   | 0,53±0,09  | 7,16E-10 | 0,41 | cyclic-nucleotide-gated-channels                                            |
| AT1G70500 | chr1_26568399 | cis   | -0,74±0,12 | 7,40E-10 | 0,14 | Pectin-lyase-like-superfamily-protein                                       |
| AT5G25490 | chr5_8875445  | cis   | -0,68±0,11 | 7,46E-10 | 0,19 | Ran-BP2/NZF-zinc-finger-like-superfamily-protein                            |
| AT5G67290 | chr5_26850045 | cis   | -0,84±0,14 | 7,61E-10 | 0,13 | FAD-dependent-oxidoreductase-family-protein                                 |
| AT1G50700 | chr1_18787783 | cis   | 0,76±0,12  | 7,67E-10 | 0,11 | calcium-dependent-protein-kinase-33                                         |
| AT3G61200 | chr3_22657467 | cis   | -0,57±0,09 | 7,72E-10 | 0,40 | Thioesterase-superfamily-protein                                            |
| AT1G29590 | chr1_10354583 | cis   | 0,61±0,1   | 7,75E-10 | 0,26 | Eukaryotic-initiation-factor-4E-protein                                     |
| AT1G25054 | chr1_8842441  | cis   | 0,85±0,14  | 7,85E-10 | 0,12 | UDP-3-O-acyl-N-acetylglucosamine-deacetylase-family-protein                 |
| AT3G47730 | chr3_17598994 | cis   | -0,53±0,09 | 7,87E-10 | 0,53 | ATP-binding-cassette-A2                                                     |
| AT5G38340 | chr5_15321266 | cis   | 0,86±0,14  | 7,88E-10 | 0,10 | Disease-resistance-protein-(TIR-NBS-LRR-class)-family                       |
| AT3G32410 | chr3_13368834 | cis   | 0,68±0,11  | 7,90E-10 | 0,19 |                                                                             |
| AT3G46440 | chr3_17091869 | cis   | 0,53±0,09  | 7,93E-10 | 0,39 | UDP-XYL-synthase-5                                                          |
| AT1G64840 | chr1_24092660 | cis   | -0,53±0,09 | 8,00E-10 | 0,40 | Protein-of-unknown-function-(DUF295)                                        |
| AT3G59750 | chr3_22078350 | cis   | 0,55±0,09  | 8,03E-10 | 0,45 | Concanavalin-A-like-lectin-protein-kinase-family-protein                    |
| AT1G52100 | chr1_19361404 | cis   | -0,6±0,1   | 8,08E-10 | 0,24 | Mannose-binding-lectin-superfamily-protein                                  |
| AT1G63000 | chr1_23342609 | cis   | 0,57±0,09  | 8,08E-10 | 0,46 | nucleotide-rhamnose-synthase/epimerase-reductase                            |
| AT5G48160 | chr5_19528651 | cis   | -0,65±0,11 | 8,18E-10 | 0,22 | Protein-of-unknown-function-(DUF1423)                                       |
| AT2G43720 | chr2_18129783 | cis   | -0,88±0,14 | 8,34E-10 | 0,11 | Eukaryotic-protein-of-unknown-function-(DUF842)                             |
| AT3G18940 | chr3_6527040  | cis   | -0,62±0,1  | 8,39E-10 | 0,27 | clast3-related                                                              |
| AT5G21950 | chr5_7255900  | cis   | -0,59±0,1  | 8,40E-10 | 0,51 | alpha/beta-Hydrolases-superfamily-protein                                   |
| AT1G15890 | chr1_5459026  | cis   | 0,94±0,15  | 8,43E-10 | 0,09 | Disease-resistance-protein-(CC-NBS-LRR-class)-family                        |
| AT3G60880 | chr3_22494822 | cis   | 0,62±0,1   | 8,44E-10 | 0,24 | dihydrodipicolinate-synthase-1                                              |
| AT4G26550 | chr4_13403992 | cis   | -0,76±0,12 | 8,48E-10 | 0,16 | Got1/Sft2-like-vesicle-transport-protein-family                             |

|           |               |       |             |          |      |                                                                          |
|-----------|---------------|-------|-------------|----------|------|--------------------------------------------------------------------------|
| AT4G23230 | chr4_12153793 | cis   | -0,66±0,11  | 8,49E-10 | 0,41 | cysteine-rich-RLK-(RECEPTOR-like-protein-kinase)-15                      |
| AT3G08880 | chr3_2704353  | cis   | 0,7±0,11    | 8,50E-10 | 0,19 |                                                                          |
| AT5G17840 | chr5_5896262  | cis   | -0,7±0,11   | 8,56E-10 | 0,19 | DnaJ/Hsp40-cysteine-rich-domain-superfamily-protein                      |
| AT5G03770 | chr5_995194   | cis   | 0,56±0,09   | 8,58E-10 | 0,36 | KDO-transferase-A                                                        |
| AT3G46900 | chr3_17271482 | cis   | -0,61±0,1   | 8,65E-10 | 0,26 | copper-transporter-2                                                     |
| AT2G23360 | chr5_14311152 | trans | 0,71±0,12   | 8,74E-10 | 0,15 | Plant-protein-of-unknown-function-(DUF869)                               |
| AT3G56320 | chr3_20882460 | cis   | 0,87±0,14   | 8,84E-10 | 0,12 | PAP/OAS1-substrate-binding-domain-superfamily                            |
| AT3G25470 | chr3_9233282  | cis   | -0,54±0,09  | 8,84E-10 | 0,52 | bacterial-hemolysin-related                                              |
| AT5G45220 | chr5_18299834 | cis   | -01,01±0,16 | 8,85E-10 | 0,09 | Disease-resistance-protein-(TIR-NBS-LRR-class)-family                    |
| AT5G09443 | chr5_2943446  | cis   | -0,84±0,14  | 8,89E-10 | 0,10 | other-RNA                                                                |
| AT1G10110 | chr1_3274595  | cis   | 0,94±0,15   | 8,91E-10 | 0,09 | F-box-family-protein                                                     |
| AT1G57600 | chr1_21334193 | cis   | -0,58±0,09  | 8,94E-10 | 0,31 | MBOAT-(membrane-bound-O-acyl-transferase)-family-protein                 |
| AT2G43990 | chr2_18212140 | cis   | 0,52±0,08   | 8,97E-10 | 0,56 |                                                                          |
| AT1G31190 | chr1_11141205 | cis   | 0,56±0,09   | 9,06E-10 | 0,38 | myo-inositol-monophosphatase-like-1                                      |
| AT4G14660 | chr4_8407709  | cis   | 0,51±0,08   | 9,25E-10 | 0,54 | RNA-polymerase-Rpb7-like,-N-terminal-domain                              |
| AT3G44716 | chr3_16263695 | cis   | -0,53±0,09  | 9,31E-10 | 0,39 |                                                                          |
| AT3G28880 | chr3_10891692 | cis   | -0,69±0,11  | 9,37E-10 | 0,19 | Ankyrin-repeat-family-protein                                            |
| AT1G55550 | chr1_20749194 | cis   | 0,59±0,1    | 9,39E-10 | 0,31 | P-loop-containing-nucleoside-triphosphate-hydrolases-superfamily-protein |
| AT3G26280 | chr3_9632640  | cis   | -0,52±0,09  | 9,55E-10 | 0,38 | cytochrome-P450,-family-71,-subfamily-B,-polypeptide-4                   |
| AT1G80570 | chr1_30288235 | cis   | -0,66±0,11  | 9,56E-10 | 0,23 | RNI-like-superfamily-protein                                             |
| AT1G04390 | chr1_1196560  | cis   | 0,76±0,12   | 9,56E-10 | 0,18 | BTB/POZ-domain-containing-protein                                        |
| AT4G22350 | chr4_11781527 | cis   | -0,59±0,1   | 9,58E-10 | 0,33 | Ubiquitin-C-terminal-hydrolases-superfamily-protein                      |
| AT5G55810 | chr5_22585634 | cis   | -0,82±0,13  | 9,73E-10 | 0,10 | nicotinate/nicotinamide-mononucleotide-adenyltransferase                 |
| AT2G27190 | chr2_11623555 | cis   | 0,54±0,09   | 9,74E-10 | 0,54 | purple-acid-phosphatase-12                                               |
| AT2G45490 | chr2_18745425 | cis   | 01,05±0,17  | 9,85E-10 | 0,06 | ataurora3                                                                |
| AT5G21274 | chr5_7215584  | cis   | 0,67±0,11   | 9,93E-10 | 0,22 | calmodulin-6                                                             |
| AT1G51965 | chr1_19314183 | cis   | -0,54±0,09  | 1,00E-09 | 0,36 | ABA-Overly-Sensitive-5                                                   |
| AT1G18540 | chr1_6376763  | cis   | 0,55±0,09   | 1,01E-09 | 0,50 | Ribosomal-protein-L6-family-protein                                      |
| AT3G30415 | chr3_12040229 | cis   | -0,61±0,1   | 1,02E-09 | 0,28 |                                                                          |
| AT5G46020 | chr5_18671090 | cis   | 0,6±0,1     | 1,04E-09 | 0,26 |                                                                          |
| AT2G18560 | chr2_8059975  | cis   | 0,56±0,09   | 1,04E-09 | 0,31 | UDP-Glycosyltransferase-superfamily-protein                              |
| AT1G16445 | chr1_5619023  | cis   | 0,56±0,09   | 1,06E-09 | 0,33 | S-adenosyl-L-methionine-dependent-methyltransferases-superfamily-protein |
| AT1G55060 | chr4_2591900  | trans | 0,93±0,15   | 1,07E-09 | 0,09 | ubiquitin-12                                                             |
| AT3G24030 | chr3_8680846  | cis   | 0,66±0,11   | 1,08E-09 | 0,19 | hydroxyethylthiazole-kinase-family-protein                               |



|           |               |       |             |          |      |                                                                           |
|-----------|---------------|-------|-------------|----------|------|---------------------------------------------------------------------------|
| AT1G23465 | chr1_8327189  | cis   | 0,53±0,09   | 1,09E-09 | 0,53 | Peptidase-S24/S26A/S26B/S26C-family-protein                               |
| AT2G43550 | chr2_18073286 | cis   | 0,59±0,1    | 1,09E-09 | 0,28 | Scorpion-toxin-like-knottin-superfamily-protein                           |
| AT4G13270 | chr4_7731923  | cis   | -0,62±0,1   | 1,11E-09 | 0,21 | Late-embryogenesis-abundant-(LEA)-hydroxyproline-rich-glycoprotein-family |
| AT2G01090 | chr2_80380    | cis   | -0,54±0,09  | 1,11E-09 | 0,53 | Ubiquinol-cytochrome-C-reductase-hinge-protein                            |
| AT1G66990 | chr1_24998798 | cis   | 0,62±0,1    | 1,12E-09 | 0,26 |                                                                           |
| AT2G31900 | chr2_13569505 | cis   | -0,8±0,13   | 1,13E-09 | 0,12 | myosin-like-protein-XIF                                                   |
| AT4G02070 | chr4_908938   | cis   | 0,58±0,1    | 1,13E-09 | 0,35 | MUTS-homolog-6                                                            |
| AT1G66980 | chr1_24996712 | cis   | -0,77±0,13  | 1,15E-09 | 0,13 | suppressor-of-npr1-1-constitutive-4                                       |
| AT2G44530 | chr2_18385999 | cis   | -0,53±0,09  | 1,15E-09 | 0,44 | Phosphoribosyltransferase-family-protein                                  |
| AT5G63580 | chr5_25432318 | cis   | -0,62±0,1   | 1,15E-09 | 0,36 | flavonol-synthase-2                                                       |
| AT5G50950 | chr5_20727510 | cis   | 0,59±0,1    | 1,15E-09 | 0,47 | FUMARASE-2                                                                |
| AT5G52547 | chr5_21326420 | cis   | -01,03±0,17 | 1,17E-09 | 0,09 |                                                                           |
| AT1G65220 | chr1_24227508 | cis   | 0,57±0,09   | 1,18E-09 | 0,31 | ARM-repeat-superfamily-protein                                            |
| AT3G09310 | chr3_2860339  | cis   | 0,74±0,12   | 1,18E-09 | 0,15 |                                                                           |
| AT2G35690 | chr2_14996156 | cis   | 0,56±0,09   | 1,19E-09 | 0,31 | acyl-CoA-oxidase-5                                                        |
| AT1G63050 | chr1_23378719 | cis   | 0,56±0,09   | 1,19E-09 | 0,31 | MBOAT-(membrane-bound-O-acyl-transferase)-family-protein                  |
| AT5G42990 | chr5_17246025 | cis   | 0,66±0,11   | 1,20E-09 | 0,21 | ubiquitin-conjugating-enzyme-18                                           |
| AT5G56020 | chr5_22689265 | cis   | -0,64±0,1   | 1,20E-09 | 0,21 | Got1/Sft2-like-vesicle-transport-protein-family                           |
| AT1G15250 | chr1_5249719  | cis   | 0,55±0,09   | 1,20E-09 | 0,46 | Zinc-binding-ribosomal-protein-family-protein                             |
| AT2G21620 | chr2_9251171  | cis   | -0,53±0,09  | 1,20E-09 | 0,52 | Adenine-nucleotide-alpha-hydrolases-like-superfamily-protein              |
| AT5G05750 | chr5_1730564  | cis   | -0,67±0,11  | 1,20E-09 | 0,24 | DNAJ-heat-shock-N-terminal-domain-containing-protein                      |
| AT1G69800 | chr1_26288176 | cis   | -0,54±0,09  | 1,21E-09 | 0,37 | Cystathionine-beta-synthase-(CBS)-protein                                 |
| AT5G02820 | chr5_638795   | cis   | -0,59±0,1   | 1,21E-09 | 0,59 | Spo11/DNA-topoisomerase-VI,-subunit-A-protein                             |
| AT4G07410 | chr4_4738380  | trans | 0,64±0,11   | 1,22E-09 | 0,29 | Transducin-family-protein/-WD-40-repeat-family-protein                    |
| AT3G01920 | chr3_315601   | cis   | 0,81±0,13   | 1,22E-09 | 0,18 | DHBP-synthase-RibB-like-alpha/beta-domain                                 |
| AT3G26240 | chr3_9628252  | cis   | -0,54±0,09  | 1,24E-09 | 0,54 | Cysteine/Histidine-rich-C1-domain-family-protein                          |
| AT5G03390 | chr5_855311   | cis   | 0,53±0,09   | 1,24E-09 | 0,41 | Protein-of-unknown-function-(DUF295)                                      |
| AT5G24060 | chr5_8123401  | cis   | 0,95±0,16   | 1,26E-09 | 0,09 | Pentatricopeptide-repeat-(PPR)-superfamily-protein                        |
| AT3G43610 | chr5_9604488  | trans | 0,65±0,11   | 1,29E-09 | 0,19 | Spc97/-Spc98-family-of-spindle-pole-body-(SBP)-component                  |
| AT4G00270 | chr4_123214   | cis   | -0,6±0,1    | 1,29E-09 | 0,29 | DNA-binding-storekeeper-protein-related-transcriptional-regulator         |
| AT5G26680 | chr5_9317120  | cis   | 01,06±0,17  | 1,29E-09 | 0,08 | 5'-3'-exonuclease-family-protein                                          |
| AT1G14640 | chr1_5038823  | cis   | 0,57±0,09   | 1,32E-09 | 0,34 | SWAP-(Suppressor-of-White-APricot)/surp-domain-containing-protein         |
| AT1G31970 | chr1_11479866 | cis   | -0,7±0,11   | 1,33E-09 | 0,16 | DEA(D/H)-box-RNA-helicase-family-protein                                  |
| AT5G37055 | chr5_14642272 | cis   | 0,61±0,1    | 1,36E-09 | 0,21 | HIT-type-Zinc-finger-family-protein                                       |

|           |               |       |            |          |      |                                                                          |
|-----------|---------------|-------|------------|----------|------|--------------------------------------------------------------------------|
| AT2G24310 | chr2_10341522 | cis   | 0,56±0,09  | 1,36E-09 | 0,38 |                                                                          |
| AT3G43400 | chr1_25248868 | trans | -0,53±0,09 | 1,37E-09 | 0,41 | ELMO/CED-12-family-protein                                               |
| AT2G36305 | chr2_15215901 | cis   | 0,88±0,15  | 1,37E-09 | 0,11 | farnesylated-protein-converting-enzyme-2                                 |
| AT1G22370 | chr1_7900160  | cis   | -0,61±0,1  | 1,39E-09 | 0,24 | UDP-glucosyl-transferase-85A5                                            |
| AT2G31490 | chr2_13411014 | cis   | 0,88±0,15  | 1,39E-09 | 0,09 |                                                                          |
| AT5G51620 | chr5_20975575 | cis   | -0,72±0,12 | 1,40E-09 | 0,19 | Uncharacterised-protein-family-(UPF0172)                                 |
| AT4G28900 | chr4_14258824 | cis   | 0,78±0,13  | 1,40E-09 | 0,13 | transposable-element-gene                                                |
| AT3G61030 | chr3_22577967 | cis   | 0,52±0,09  | 1,41E-09 | 0,48 | Calcium-dependent-lipid-binding-(CaLB-domain)-family-protein             |
| AT5G40400 | chr5_16169885 | cis   | -0,66±0,11 | 1,42E-09 | 0,19 | Pentatricopeptide-repeat-(PPR)-superfamily-protein                       |
| AT4G01525 | chr4_664689   | cis   | -0,58±0,1  | 1,42E-09 | 0,21 | transposable-element-gene                                                |
| AT3G21690 | chr3_7635436  | cis   | -0,78±0,13 | 1,42E-09 | 0,14 | MATE-efflux-family-protein                                               |
| AT1G24148 | chr1_8544275  | cis   | -0,64±0,11 | 1,42E-09 | 0,20 |                                                                          |
| AT4G13495 | chr4_7845665  | cis   | -0,52±0,09 | 1,43E-09 | 0,49 | other-RNA                                                                |
| AT5G23405 | chr5_7884380  | cis   | 0,51±0,08  | 1,45E-09 | 0,44 | HMG-box-(high-mobility-group)-DNA-binding-family-protein                 |
| AT1G07960 | chr1_2471021  | cis   | 0,51±0,08  | 1,45E-09 | 0,43 | PDI-like-5-1                                                             |
| AT1G17820 | chr1_6097465  | cis   | 0,9±0,15   | 1,45E-09 | 0,10 | Putative-integral-membrane-protein-conserved-region-(DUF2404)            |
| AT2G35635 | chr2_14981947 | cis   | -0,6±0,1   | 1,48E-09 | 0,22 | ubiquitin-7                                                              |
| AT3G02710 | chr3_618249   | cis   | 0,54±0,09  | 1,49E-09 | 0,45 | ARM-repeat-superfamily-protein                                           |
| AT3G43600 | chr3_15517078 | cis   | -0,61±0,1  | 1,50E-09 | 0,23 | aldehyde-oxidase-2                                                       |
| AT4G16845 | chr4_9475749  | cis   | 0,5±0,08   | 1,51E-09 | 0,53 | VEFS-Box-of-polycomb-protein                                             |
| AT1G02520 | chr1_523780   | cis   | -0,69±0,11 | 1,52E-09 | 0,20 | P-glycoprotein-11                                                        |
| AT5G48660 | chr5_19736200 | cis   | -0,69±0,11 | 1,53E-09 | 0,17 | B-cell-receptor-associated-protein-31-like-                              |
| AT3G48320 | chr3_17891171 | cis   | -0,53±0,09 | 1,53E-09 | 0,34 | cytochrome-P450,-family-71,-subfamily-A,-polypeptide-21                  |
| AT5G47960 | chr5_19410732 | cis   | 0,54±0,09  | 1,58E-09 | 0,47 | RAB-GTPase-homolog-A4C                                                   |
| AT3G45410 | chr3_16655687 | cis   | 0,55±0,09  | 1,58E-09 | 0,36 | Concanavalin-A-like-lectin-protein-kinase-family-protein                 |
| AT2G43540 | chr2_18070625 | cis   | -0,66±0,11 | 1,61E-09 | 0,19 |                                                                          |
| AT1G74780 | chr1_28095806 | cis   | -0,95±0,16 | 1,62E-09 | 0,08 | Nodulin-like-/-Major-Facilitator-Superfamily-protein                     |
| AT2G41050 | chr2_17125850 | cis   | -0,57±0,09 | 1,63E-09 | 0,31 | PQ-loop-repeat-family-protein-/-transmembrane-family-protein             |
| AT1G59840 | chr1_22026485 | cis   | 0,92±0,15  | 1,65E-09 | 0,09 | cofactor-assembly-of-complex-C                                           |
| AT1G66690 | chr1_24877851 | cis   | 0,52±0,09  | 1,66E-09 | 0,46 | S-adenosyl-L-methionine-dependent-methyltransferases-superfamily-protein |
| AT4G34900 | chr4_16629287 | cis   | -0,59±0,1  | 1,66E-09 | 0,24 | xanthine-dehydrogenase--2                                                |
| AT3G14700 | chr3_4943857  | cis   | 0,6±0,1    | 1,67E-09 | 0,25 | SART-1-family                                                            |
| AT1G05720 | chr1_1716782  | cis   | -0,67±0,11 | 1,67E-09 | 0,21 | selenoprotein-family-protein                                             |
| AT4G36130 | chr4_17096933 | cis   | 0,62±0,1   | 1,68E-09 | 0,25 | Ribosomal-protein-L2-family                                              |

**Table S5. 175 genes affected by eQTL in the population of 140 wild-collected *A. thaliana* accessions for which strong phenotypic effect have already been described in the literature**

| <i>Locus</i> | <i>Gene</i> | <i><sup>a</sup>SNP</i>      | <i><sup>b</sup>Type</i> | <i><sup>c</sup>Replicated</i> | <i>Short description</i>                               | <i><sup>d</sup>Description of mutant phenotype</i>                                                                                                                                                                                                                                                  | <i><sup>e</sup>Reference</i> | <i><sup>f</sup>Year</i> |
|--------------|-------------|-----------------------------|-------------------------|-------------------------------|--------------------------------------------------------|-----------------------------------------------------------------------------------------------------------------------------------------------------------------------------------------------------------------------------------------------------------------------------------------------------|------------------------------|-------------------------|
| AT1G02050    | LAP6        | chr1_360888                 | cis                     | Yes                           | Less Adhesive Pollen                                   | Abnormal pollen exine layer<br>Ovule abortion; Gametophyte defective; Early embryo defective                                                                                                                                                                                                        | C. Douglas                   | 2010                    |
| AT1G11870    | OVA7        | chr1_4004173                | cis                     | Yes                           | Ovule Abortion                                         | (inferred)<br>Slightly elevated levels of photorespiratory intermediates; No other phenotypes detected                                                                                                                                                                                              | D. Meinke                    | 2005                    |
| AT1G12550    | HPR3        | chr1_4275390                | cis                     | Yes                           | Hydroxypyruvate Reductase                              | phenotypes detected                                                                                                                                                                                                                                                                                 | H. Bauwe                     | 2011                    |
| AT1G48380    | RHL1        | chr1_17879415               | cis                     | Yes                           | Root Hairless                                          | Complete loss of root hairs on primary root                                                                                                                                                                                                                                                         | L. Dolan                     | 1998                    |
| AT1G54040    | TASTY       | chr1_20170832               | cis                     | Yes                           | Tasty                                                  | Abnormal glucosinolate composition                                                                                                                                                                                                                                                                  | F. Ausubel                   | 2001                    |
| AT1G55320    | AAE18       | chr1_20635146               | cis                     | Yes                           | Acyl-Activation Enzyme                                 | Insensitive to pro-auxins                                                                                                                                                                                                                                                                           | J. Bussell                   | 2009                    |
| AT1G63000    | UER1        | chr1_23342609               | cis                     | Yes                           | UDP-4-Keto-6-Deoxy-D-Glucose-3,5-Epimerase-4-Reductase | Short root hairs                                                                                                                                                                                                                                                                                    | Y. Zhu                       | 2010                    |
| AT1G63900    | DAL1        | chr1_23717698               | cis                     | Yes                           | DIAP1-Like Protein                                     | Susceptible to avirulent bacteria                                                                                                                                                                                                                                                                   | F. Song                      | 2011                    |
| AT1G64970    | TMT1        | chr1_24135673               | cis                     | Yes                           | Tocopherol Methyltransferase                           | Slightly reduced fresh weight; Low alpha and beta tocopherol levels                                                                                                                                                                                                                                 | P. Doermann                  | 2003                    |
| AT2G28560    | RAD51B      | chr2_12237067               | cis                     | Yes                           | Rad51 Paralog                                          | Sensitive to mitomycin C (DNA cross-linking agent)                                                                                                                                                                                                                                                  | C. White                     | 2005                    |
| AT2G32940    | AGO6        | chr2_13973428               | cis                     | Yes                           | Argonaute                                              | Decreased DNA methylation                                                                                                                                                                                                                                                                           | J. Zhu                       | 2007                    |
| AT2G41660    | MIZ1        | chr2_17409805               | cis                     | Yes                           | Mizu-Kussei                                            | Reduced hydrotropism                                                                                                                                                                                                                                                                                | H. Takahashi                 | 2007                    |
| AT3G07525    | ATG10       | chr3_2398863                | cis                     | Yes                           | Autophagy                                              | Slightly slower rosette growth; Reduced fertility; Late flowering; Early senescence; Sensitive to carbon starvation and limited nitrogen<br>Male gametophyte defective; Homozygotes are viable: Severely reduced male fertility at high temperature; Fertility phenotype rescued at low temperature | R. Vierstra                  | 2008                    |
| AT3G08970    | AtERdj3A    | chr3_2737991                | cis                     | Yes                           |                                                        | Very low germination rate; Slow seedling growth; Narrow leaves; Short primary root; Short inflorescence stems with abnormal architecture                                                                                                                                                            | D. Ye                        | 2009                    |
| AT3G11220    | ELO1        | chr3_3513881                | cis                     | Yes                           | Elongata                                               | Reduced fertility; Late flowering                                                                                                                                                                                                                                                                   | M. Van Lijsebettens          | 2005                    |
| AT3G18165    | MOS4        | chr3_6222138                | cis                     | Yes                           | Modifier of <i>snc1</i> , 4                            | Root growth sensitive to toxic compounds (including one in Bacto agar)                                                                                                                                                                                                                              | X. Li                        | 2007                    |
| AT3G23560    | ALF5        | chr3_8456447                | cis                     | Yes                           | Aberrant Lateral Root Formation                        | Embryo defective; Transition                                                                                                                                                                                                                                                                        | G. Fink                      | 2001                    |
| AT3G29290    | EMB2076     | chr3_11238348               | cis                     | Yes                           | Embryo Defective                                       | Embryo defective; Transition                                                                                                                                                                                                                                                                        | D. Meinke                    | 2003                    |
| AT3G43210    | TES         | chr3_15190921               | cis                     | Yes                           | Tetraspore                                             | Reduced fertility due to defects in meiosis; Large pollen                                                                                                                                                                                                                                           | H. Dickinson                 | 2003                    |
| AT3G45890    | RUS1        | chr3_16877300               | cis                     | Yes                           | Root UV-B Sensitive                                    | Short roots; Seedling lethal when roots are exposed to UV-B light                                                                                                                                                                                                                                   | Z. He                        | 2009                    |
| AT3G55530    | SDIR1       | chr3_20593930               | cis                     | Yes                           | Salt- and Drought-Induced RING Finger                  | Long primary root<br>Dwarf; Slow growth; Low penetrance of fasciated stems and inflorescences; Increased floral organ number; Reduced fertility; Late flowering; Large shoot meristem                                                                                                               | Q. Xie                       | 2007                    |
| AT3G59380    | FTA         | chr3_21945839               | cis                     | Yes                           | Farnesyltransferase                                    | Embryo defective; Preglobular                                                                                                                                                                                                                                                                       | S. Yalovsky                  | 2004                    |
| AT4G00620    | EMB3127     | chr4_261007                 | cis                     | Yes                           | Embryo Defective                                       | Embryo defective; Preglobular                                                                                                                                                                                                                                                                       | D. Meinke                    | 2011                    |
| AT4G01060    | CPL3        | chr4_448429                 | cis                     | Yes                           | Caprice-Like MYB                                       | Increased trichome density; Abnormal root hairs<br>Male and female gametophyte defective; Homozygotes are viable:                                                                                                                                                                                   | T. Wada                      | 2008                    |
| AT4G02460    | PMS1        | chr4_1074131/chr5_14985436  | cis/trans               | Yes                           | Post Meiotic Segregation                               | Reduced fertility                                                                                                                                                                                                                                                                                   | F. Belzile                   | 2009                    |
| AT4G19100    | PAM68       | chr4_10453802               | cis                     | Yes                           | Photosynthesis Affected Mutant                         | Pale green cotyledons and leaves; Slow growth                                                                                                                                                                                                                                                       | D. Leister                   | 2010                    |
| AT4G21320    | Hsa32       | chr4_11340530               | cis                     | Yes                           | Heat-Stress-Associated                                 | Sensitive to high temperature<br>Abnormal root gravitropism; Anti-clockwise twisting rosette leaves, cauline leaves, and petals                                                                                                                                                                     | S. Ko                        | 2006                    |
| AT4G27060    | TOR1        | chr1_11506730/chr4_13571868 | trans/cis               | Yes                           | Tortifolia                                             | Sensitive to photooxidative stress                                                                                                                                                                                                                                                                  | T. Hashimoto                 | 2000                    |
| AT4G31870    | GPX7        | chr4_15409973               | cis                     | Yes                           | Glutathione Peroxidase                                 | Germination and stomatal closure insensitive to ABA                                                                                                                                                                                                                                                 | S. Karpinski                 | 2009                    |
| AT4G33360    | FLDH        | chr4_16069056               | cis                     | Yes                           | Farnesol Dehydrogenase                                 |                                                                                                                                                                                                                                                                                                     | D. Crowell                   | 2010                    |

|           |         |                             |           |     |                                                              |                                                                                                                                                                                                                            |                 |      |
|-----------|---------|-----------------------------|-----------|-----|--------------------------------------------------------------|----------------------------------------------------------------------------------------------------------------------------------------------------------------------------------------------------------------------------|-----------------|------|
| AT4G37925 | NDH-M   | chr4_17830243               | cis       | Yes | Subunit NDH-M of NAD(P)H:Plastoquinone Dehydrogenase Complex | Complete loss of post-illumination chlorophyll fluorescence; Slightly increased non-photochemical quenching                                                                                                                | G. Peltier      | 2005 |
| AT4G38800 | MTN1    | chr4_18114982               | cis       | Yes | Methylthioadenosine Nucleosidase                             | Reduced growth with MTA as source of nitrogen<br>Embryo defective; Preglobular; Enlarged embryo cells and endosperm nuclei                                                                                                 | M. Sauter       | 2010 |
| AT4G39920 | POR     | chr4_18519040               | cis       | Yes | Porcino                                                      | Low C8 glucosinolate levels                                                                                                                                                                                                | U. Mayer        | 2002 |
| AT5G23020 | IMS2    | chr5_7703372                | cis       | Yes | 2-Isopropylmalate Synthase                                   | Sensitive to genotoxic stress                                                                                                                                                                                              | J. Gershenzon   | 2007 |
| AT5G45610 | HUS2    | chr5_18496799               | cis       | Yes | Hydroxyurea Sensitive                                        | Small root system; Reduced fertility; Sensitive to high light; Increased growth in response to sucrose; Resistant to salt                                                                                                  | A. Tanaka       | 2009 |
| AT5G49970 | AtPPOX  | chr5_20333567               | cis       | Yes | Pyridoxin (Pyrodoxamine) 5'-phosphate Oxidase                | Low fumarate levels; Low amino acid levels in the daytime; Elevated amino acid levels at night                                                                                                                             | M. Daub         | 2007 |
| AT5G50950 | FUM2    | chr5_20727510               | cis       | Yes | Fumarase                                                     | Slow growth; Short roots; Fasciated stems and inflorescences; Abnormal leaf morphology; Abnormal phyllotaxy; Reduced petal and stamen number; Narrow sepals and petals; Reduced fertility; Abnormal SAM and RAM morphology | S. Smith        | 2010 |
| AT5G64630 | FAS2    | chr5_25833185               | cis       | Yes | Fasciata                                                     | Reduced fertility due to defects in meiosis                                                                                                                                                                                | T. Araki        | 2001 |
| AT1G01690 | PRD3    | chr1_249475                 | cis       | No  | Putative Recombination Initiation Defect                     | Complete loss of root gravitropism                                                                                                                                                                                         | M. Grelon       | 2009 |
| AT1G04250 | AXR3    | chr1_1134230                | cis       | No  | Auxin Resistant                                              | Short, thick hypocotyl; Helical growth; Right-handed petiole torsions;                                                                                                                                                     | O. Leyser       | 1998 |
| AT1G04820 | TOR2    | chr1_1364944                | cis       | No  | Tortifolia                                                   | Sensitive to microtubule-disrupting drugs                                                                                                                                                                                  | A. Schaffner    | 2009 |
| AT1G05630 | At5PT13 | chr1_1681154                | cis       | No  | Inositol Polyphosphate 5' Phosphatase                        | Altered vein patterning in cotyledons                                                                                                                                                                                      | H. Xue          | 2005 |
| AT1G06570 | PDS1    | chr3_13898892               | trans     | No  | Phytoene Desaturase                                          | Seedling lethal (inferred from pigment defect)<br>Small cotyledons; Small, pale green leaves; Short roots and inflorescence stems; Early senescence; Abnormal vein morphology; Disorganized                                | D. DellaPenna   | 1998 |
| AT1G08030 | TPST    | chr1_2492448                | cis       | No  | Tyrosylprotein Sulfotransferase                              | RAM                                                                                                                                                                                                                        | Y. Matsubayashi | 2009 |
| AT1G14660 | AtNHX8  | chr1_5030827                | cis       | No  | Sodium Hydrogen Exchanger                                    | Sensitive to lithium<br>Short roots; Sensitive to sodium, potassium, copper, and zinc; Resistant to nickel                                                                                                                 | X. Wang         | 2007 |
| AT1G16150 | WAKL4   | chr1_5531987                | cis       | No  | Wall-Associated Kinase-Like                                  | Embryo defective; Preglobular                                                                                                                                                                                              | Z. He           | 2005 |
| AT1G19080 | TTN10   | chr1_6586637                | cis       | No  | Titan                                                        | Sensitive to genotoxic stress                                                                                                                                                                                              | D. Meinke       | 2003 |
| AT1G19750 | CSAat1B | chr1_6832148                | cis       | No  | Cockayne Syndrome A-like Protein                             | Embryo and seedling defective                                                                                                                                                                                              | T. Guo          | 2010 |
| AT1G20050 | HYD1    | chr1_6947020                | cis       | No  | Hydra                                                        | Incomplete penetrance of seedling lethality; Slow growth; Small seedlings; Short roots                                                                                                                                     | K. Lindsey      | 2002 |
| AT1G21270 | WAK2    | chr1_7447447                | cis       | No  | Wall-Associated Kinase                                       | Embryo defective; Globular                                                                                                                                                                                                 | N. Byers        | 2006 |
| AT1G24340 | EMB2421 | chr1_8635114                | cis       | No  | Embryo Defective                                             | Abnormal starch, anthocyanin, and chlorophyll levels; Sensitive to sugar                                                                                                                                                   | D. Meinke       | 2003 |
| AT1G30620 | MUR4    | chr1_10864371               | cis       | No  | Murus                                                        | Sensitive to drought and salt; Insensitive to ABA                                                                                                                                                                          | M. Bevan        | 2007 |
| AT1G35670 | AtCDPK2 | chr1_13203648               | cis       | No  | Calcium-Dependent Protein Kinase                             | Sensitive to freezing when not acclimated                                                                                                                                                                                  | D. Zhang        | 2007 |
| AT1G49720 | ABF1    | chr1_18400592               | cis       | No  | ABRE Binding Factor                                          | Null: Male gametophyte defective; Embryo defective (inferred);                                                                                                                                                             | T. Palva        | 2002 |
| AT1G50500 | HIT1    | chr1_18716339               | cis       | No  | Heat-Intolerant                                              | Knockdown: Sensitive to high temperature and osmotic stress                                                                                                                                                                | S. Wu           | 2006 |
| AT1G51965 | ABO5    | chr1_19314183               | cis       | No  | ABA Overly-Sensitive                                         | Seedling and root growth sensitive to ABA                                                                                                                                                                                  | Z. Gong         | 2010 |
| AT1G53580 | ETHE1   | chr1_19989116               | cis       | No  | Similar to Human ETHE1                                       | Embryo defective; Transition                                                                                                                                                                                               | C. Makaroff     | 2007 |
| AT1G56510 | WRR4    | chr1_21171909               | cis       | No  | White Rust Resistance                                        | Susceptible to Albugo candida                                                                                                                                                                                              | E. Holub        | 2008 |
| AT1G65420 | NPQ7    | chr1_23055533/chr1_24290690 | trans/cis | No  | Nonphotochemical Quenching                                   | Reduced non-photochemical quenching                                                                                                                                                                                        | K. Niyogi       | 2010 |
| AT1G66340 | EIN1    | chr1_24734188               | cis       | No  | Ethylene Insensitive                                         | Sensitive to ethylene                                                                                                                                                                                                      | P. Larsen       | 2002 |

|           |         |               |       |    |                                                                 |                                                                                                                                                                                      |                |      |
|-----------|---------|---------------|-------|----|-----------------------------------------------------------------|--------------------------------------------------------------------------------------------------------------------------------------------------------------------------------------|----------------|------|
| AT1G67440 | EMB1688 | chr1_25265828 | cis   | No | Embryo Defective                                                | Embryo defective; Cotyledon                                                                                                                                                          | D. Meinke      | 2002 |
| AT1G71440 | PFI     | chr1_26921006 | cis   | No | Pffifferling                                                    | Embryo defective; Preglobular; Enlarged embryo cells and endosperm nuclei                                                                                                            | U. Mayer       | 2002 |
| AT1G75100 | JAC1    | chr1_28192328 | cis   | No | J-Domain Protein Required for Chloroplast Accumulation Response | Abnormal chloroplast movement under weak blue light and in the dark                                                                                                                  | M. Wada        | 2005 |
| AT1G77140 | VPS45   | chr4_6758588  | trans | No | Vacuolar Sorting Protein                                        | Null: Complete male gametophyte defective; Female gametophyte defective; Knockdown: Severe dwarf                                                                                     | D. Bassham     | 2009 |
| AT2G02955 | MEE12   | chr2_860116   | cis   | No | Maternal Effect Embryo Arrest                                   | Female gametophyte defective; Embryo defective (inferred)                                                                                                                            | W. Yang        | 2007 |
| AT2G03760 | SOT12   | chr2_1150723  | cis   | No | Sulphotransferase                                               | Germination sensitive to ABA and salt; Seedling growth sensitive to SA; Susceptible to bacterial infection                                                                           | H. Shi         | 2010 |
| AT2G04530 | TRZ2    | chr3_16228923 | trans | No | tRNase Z                                                        | Embryo defective; Globular                                                                                                                                                           | A. Marchfelder | 2009 |
| AT2G04550 | IBR5    | chr2_1579467  | cis   | No | Indole-3-Butyric Acid Response                                  | Long primary root; Few, short lateral roots; Short hypocotyl; Serrated leaves; Abnormal vascular patterning                                                                          | B. Bartel      | 2003 |
| AT2G06510 | RPA70a  | chr2_2336551  | trans | No | Replication Protein A                                           | Reduced fertility due to defects in meiosis; Sensitive to genotoxic stress                                                                                                           | K. Tamura      | 2009 |
| AT2G15820 | OTP51   | chr2_6888822  | cis   | No | Organelle Transcript Processing                                 | Lethal on soil or in normal light; Pale yellow; With exogenous sucrose under low light: Pale green; Dwarf; Slow growth                                                               | I. Small       | 2008 |
| AT2G16390 | DRD1    | chr2_7093811  | cis   | No | Defective in RNA-Directed DNA Methylation                       | Reduced RNA-directed DNA methylation                                                                                                                                                 | A. Matzke      | 2004 |
| AT2G17250 | EMB2762 | chr2_7502298  | cis   | No | Embryo Defective                                                | Embryo defective; Globular                                                                                                                                                           | D. Meinke      | 2007 |
| AT2G18390 | TTN5    | chr2_7987752  | cis   | No | Titan                                                           | Embryo defective; Preglobular; Enlarged embryo cells and endosperm nuclei                                                                                                            | D. Meinke      | 2002 |
| AT2G18710 | SCY1    | chr2_8112156  | cis   | No | SecY Homolog                                                    | Seedling lethal; Albino embryos                                                                                                                                                      | D. Fernandez   | 2011 |
| AT2G21070 | FIO1    | chr2_9049079  | cis   | No | Fiona                                                           | Early flowering; Abnormal circadian rhythms                                                                                                                                          | H. Nam         | 2008 |
| AT2G21870 | MGP1    | chr2_9321894  | cis   | No | Male Gametophyte Defective                                      | Complete male gametophyte defective; Female gametophyte defective                                                                                                                    | D. Ye          | 2010 |
| AT2G22410 | SLO1    | chr2_9507478  | cis   | No | Slow Growth                                                     | Dwarf; Slow growth                                                                                                                                                                   | M. Hsieh       | 2010 |
| AT2G26460 | SMU2    | chr2_11264873 | cis   | No | Suppressors of MEC-8 and UNC-52                                 | Slow growth; Incomplete penetrance of abnormal cotyledon number and heavy seeds                                                                                                      | B. Larkins     | 2009 |
| AT2G26830 | EMB1187 | chr2_11419578 | cis   | No | Embryo Defective                                                | Embryo defective; Globular                                                                                                                                                           | D. Meinke      | 2002 |
| AT2G28670 | ESB2    | chr2_12301537 | cis   | No | Enhanced Suberin                                                | Resistant to drought; Elevated suberin levels in roots                                                                                                                               | D. Salt        | 2009 |
| AT2G30280 | RDM4    | chr2_12910878 | cis   | No | RNA-Directed DNA Methylation                                    | Increased seed dormancy; Pale green seedlings; Slow growth; Dwarf; Abnormal phyllotaxy; Abnormal rosette leaf morphology; Reduced fertility; Late flowering; Altered DNA methylation | M. Matzke      | 2009 |
| AT2G31530 | EMB2289 | chr2_13436307 | cis   | No | Embryo Defective                                                | Embryo defective; Globular                                                                                                                                                           | D. Meinke      | 2002 |
| AT2G34790 | EDA28   | chr2_14679048 | cis   | No | Embryo Sac Development Arrest                                   | Female gametophyte defective; Embryo defective (inferred)                                                                                                                            | V. Sundaresan  | 2005 |
| AT2G37680 | PAT3    | chr2_15803792 | cis   | No | Phytochrome A Transduction                                      | Long hypocotyl under far-red light                                                                                                                                                   | N. Chua        | 2001 |
| AT2G37860 | LCD1    | chr2_15852326 | cis   | No | Lower Cell Density                                              | Pale plants in response to ozone                                                                                                                                                     | P. Conklin     | 2002 |
| AT2G40970 | MYBC1   | chr2_17098828 | cis   | No | MYB transcription factor                                        | Resistant to freezing                                                                                                                                                                | J. Li          | 2010 |
| AT2G42160 | BRIZ1   | chr2_17574128 | cis   | No | BRAP2 RING ZnUBP Domain-Containing Protein                      | Seedling lethal; Pale embryos; Delayed germination                                                                                                                                   | J. Callis      | 2010 |
| AT2G46240 | AtBAG6  | chr4_10473876 | trans | No | BCL-2-Associated Athanogene                                     | Heterozygotes: Increased branching and lateral root number; Early flowering and senescence; Incomplete penetrance of purple leaves; Homozygotes not mentioned                        | M. Dickman     | 2006 |
| AT2G47980 | SCC3    | chr5_26359562 | trans | No | Sister-Chromatid Cohesion Protein                               | No homozygous mutant plants recovered; Heterozygotes: Reduced sister chromatid alignment                                                                                             | I. Schubert    | 2009 |
| AT2G48120 | PAC     | chr2_19683015 | cis   | No | Pale Cress                                                      | Seedling lethal (inferred from pigment defect)                                                                                                                                       | P. Scolnik     | 1994 |

|           |         |                            |           |    |                                                       |                                                                                                                                                                                                                                                         |                 |      |
|-----------|---------|----------------------------|-----------|----|-------------------------------------------------------|---------------------------------------------------------------------------------------------------------------------------------------------------------------------------------------------------------------------------------------------------------|-----------------|------|
| AT3G02680 | NBS1    | chr3_582584                | cis       | No | Nijmegen Breakage Syndrome                            | Sensitive to MMS (inducer of genotoxic stress) and mitomycin C (DNA cross-linking agent)                                                                                                                                                                | C. West         | 2007 |
| AT3G02850 | SKOR    | chr3_627697                | cis       | No | Defect in SKOR K+ Channel                             | Low potassium levels in shoot and xylem sap<br>Null: Complete male gametophyte defective; Female gametophyte defective; Knockdown: Male gametophyte defective; Homozygotes are viable: Dwarf; Short roots; Reduced fertility                            | H. Sentenac     | 1998 |
| AT3G05530 | RPT5a   | chr3_1599235               | cis       | No | Regulatory Particle                                   | Embryo defective; Globular                                                                                                                                                                                                                              | P. Guerche      | 2009 |
| AT3G06430 | EMB2750 | chr5_10045758              | trans     | No | Embryo Defective                                      | Male gametophyte defective; Embryo defective (inferred)                                                                                                                                                                                                 | D. Meinke       | 2003 |
| AT3G16640 | TCTP    | chr3_5669704               | cis       | No | Translationally Controller Tumor Protein              | Seedling lethal (inferred from pigment defect)                                                                                                                                                                                                          | J. Masle        | 2008 |
| AT3G17650 | PDE321  | chr3_10273905              | trans     | No | Pigment Defective Embryo                              | Null: No homozygous mutant plants recovered; Knockdown: Chlorotic cotyledons; Slight delay in growth                                                                                                                                                    | D. Meinke       | 2003 |
| AT3G19570 | SCO3    | chr5_25494317              | trans     | No | Snowy Cotyledon                                       | Reduced fertility due to defects in meiosis                                                                                                                                                                                                             | B. Pogson       | 2010 |
| AT3G22880 | DMC1    | chr3_8085466               | cis       | No | Homolog of Yeast DMC 1                                | Embryo defective; Cotyledon                                                                                                                                                                                                                             | M. Doutriaux    | 1999 |
| AT3G23110 | EMB2800 | chr3_8227670               | cis       | No | Embryo Defective                                      | Germination and seedling growth sensitive to low temperature                                                                                                                                                                                            | D. Meinke       | 2008 |
| AT3G26420 | AtRZ-1a | chr3_9674892               | cis       | No |                                                       | Abnormal stomata morphology                                                                                                                                                                                                                             | H. Kang         | 2005 |
| AT3G26744 | ICE1    | chr3_9833104               | cis       | No | Inducer of CBF Expression                             | Reduced fertility due to defects in meiosis                                                                                                                                                                                                             | K. Torii        | 2008 |
| AT3G27730 | RCK     | chr3_10279321              | cis       | No | Rock-N-Rollers                                        | Increased branching and leaf number; Abnormal flower and leaf morphology; Reduced fertility; Early flowering                                                                                                                                            | H. Ma           | 2005 |
| AT3G28730 | SSRP1   | chr3_10776224              | cis       | No |                                                       | Altered response to fungal infection                                                                                                                                                                                                                    | K. Grasser      | 2009 |
| AT3G46530 | RPP13   | chr3_17133077              | cis       | No | Recognition of Peronospora parasitica                 | Embryo defective; Preglobular                                                                                                                                                                                                                           | J. Benyon       | 2000 |
| AT3G46740 | TOC75   | chr4_12536294              | trans     | No | Translocon at outer envelope membrane of chloroplasts | Dwarf; Bleached leaves; Phenotype enhanced under high light                                                                                                                                                                                             | P. Jarvis       | 2007 |
| AT3G47390 | PHS1    | chr3_17461680              | cis       | No | Photosensitive                                        | Insensitive to elevated sugar                                                                                                                                                                                                                           | L. Zhang        | 2010 |
| AT3G47990 | SIS3    | chr3_17715309              | cis       | No | Sugar Insensitive                                     | Reduced female fertility                                                                                                                                                                                                                                | S. Gibson       | 2010 |
| AT3G48190 | ATM     | chr1_20829477              | trans     | No | Ataxia-Telangiectasia Mutated                         | Shoots fail to regenerate from callus at high temperature                                                                                                                                                                                               | A. Tissier      | 2003 |
| AT3G49180 | RID3    | chr3_18229388              | cis       | No | Root Initiation Defective                             | Elevated anthocyanin levels in response to nitrogen                                                                                                                                                                                                     | M. Sugiyama     | 2009 |
| AT3G49940 | LBD38   | chr1_11421011              | trans     | No | LOB Domain-Containing Protein                         | Slow growth; Long, dark green leaves with bent margins                                                                                                                                                                                                  | W. Scheible     | 2009 |
| AT3G50820 | PsbO2   | chr4_5706995               | trans     | No | Photosystem II Subunit                                | Pale green seeds and seedlings                                                                                                                                                                                                                          | C. Spetea       | 2007 |
| AT3G51820 | PDE325  | chr3_19215689              | cis       | No | Pigment Defective Embryo                              | Unable to regenerate shoots from callus; Phenotype enhanced at high temperature                                                                                                                                                                         | D. Meinke       | 2008 |
| AT3G54280 | RGD3    | chr2_5407788               | trans     | No | Root Growth Defective                                 | High penetrance of seedling lethality on soil; Curled, thick cotyledons; Short hypocotyls; Short roots; Increased lateral root number; Pale, bleached, small rosette leaves; Complete loss of branching; Severely reduced fertility; Fragile cotyledons | M. Sugiyama     | 2009 |
| AT3G55830 | EPC1    | chr1_12244325              | trans     | No | Ectopically Parting Cells                             | Altered vernalization requirement for flowering                                                                                                                                                                                                         | A. Marchant     | 2005 |
| AT4G00650 | FRI     | chr1_16822116/chr4_259252  | trans/cis | No | Frigida                                               | Altered pistil morphology                                                                                                                                                                                                                               | C. Dean         | 2000 |
| AT4G01500 | NGA4    | chr1_516502                | trans     | No | Ngatha                                                | Complete male gametophyte defective                                                                                                                                                                                                                     | C. Ferrandiz    | 2009 |
| AT4G02195 | SYP42   | chr4_974563                | cis       | No | Syntaxin of Plants                                    | Embryo defective; Preglobular                                                                                                                                                                                                                           | N. Raikhel      | 2001 |
| AT4G03240 | AtFH    | chr4_1479106               | trans     | No | Frataxin                                              | Male and female gametophyte defective; Rare embryo defective (inferred)                                                                                                                                                                                 | D. Gomez-Casati | 2007 |
| AT4G05450 | PGD6    | chr4_2759845               | cis       | No | Pollen Germination Defective                          | Insensitive to IBA                                                                                                                                                                                                                                      | S. McCormick    | 2009 |
| AT4G05530 | IBR1    | chr4_2817353               | cis       | No | Indole-3-Butyric Acid Response                        | Embryo defective; Globular                                                                                                                                                                                                                              | J. Bussell      | 2009 |
| AT4G11150 | EMB2448 | chr4_6801368               | cis       | No | Embryo Defective                                      | Embryo defective; Globular                                                                                                                                                                                                                              | D. Meinke       | 2003 |
| AT4G14590 | EMB2739 | chr4_8374711/chr5_14551793 | cis/trans | No | Embryo Defective                                      | Decreased DNA methylation                                                                                                                                                                                                                               | D. Meinke       | 2003 |
| AT4G15950 | RDM2    | chr4_9036335               | cis       | No | RNA-Directed DNA Methylation                          |                                                                                                                                                                                                                                                         | J. Zhu          | 2008 |

|           |         |                           |           |    |                                      |                                                                                                                                                                                                   |                  |      |
|-----------|---------|---------------------------|-----------|----|--------------------------------------|---------------------------------------------------------------------------------------------------------------------------------------------------------------------------------------------------|------------------|------|
| AT4G16845 | VRN2    | chr4_9475749              | cis       | No | Reduced Vernalization Response       | Altered vernalization response                                                                                                                                                                    | C. Dean          | 2001 |
| AT4G16990 | RLM3    | chr4_9568061              | cis       | No | Resistance to Leptosphaeria Maculans | Susceptible to necrotrophic fungi                                                                                                                                                                 | C. Dixelius      | 2008 |
| AT4G18750 | DOT4    | chr4_10304955             | cis       | No | Defectively Organized Tributaries    | Short roots; Small rosette; Abnormal leaf morphology                                                                                                                                              | T. Nelson        | 2008 |
| AT4G18960 | AG      | chr4_10381453             | cis       | No | Agamous                              | Homeotic floral transformations                                                                                                                                                                   | E. Meyerowitz    | 1990 |
| AT4G19040 | EDR2    | chr4_10430162             | cis       | No | Enhanced Disease Resistance          | Resistant to powdery mildew                                                                                                                                                                       | R. Innes         | 2005 |
| AT4G19350 | EMB3006 | chr4_10562571             | cis       | No | Embryo Defective                     | Embryo defective; Preglobular / Globular                                                                                                                                                          | D. Meinke        | 2004 |
| AT4G19490 | AtVPS54 | chr4_10616870             | cis       | No | VPS54 Homolog                        | Male and female gametophyte defective; Embryo defective (inferred)                                                                                                                                | S. Bonhomme      | 2008 |
| AT4G20400 | AtJmj4  | chr4_11015485             | cis       | No | Jumonji                              | Early flowering independent of photoperiod                                                                                                                                                        | Y. Noh           | 2009 |
| AT4G29860 | EMB2757 | chr4_14605507             | cis       | No | Embryo Defective                     | Embryo defective; Cotyledon                                                                                                                                                                       | D. Meinke        | 2004 |
| AT4G34620 | SSR16   | chr1_29284466             | trans     | No | Small Subunit Ribosomal Protein      | Embryo defective; Transition                                                                                                                                                                      | N. Fedoroff      | 1996 |
| AT4G35520 | MLH3    | chr4_16865237             | cis       | No | MutL Protein Homolog                 | Reduced fertility                                                                                                                                                                                 | F. Franklin      | 2006 |
| AT4G37270 | HMA1    | chr4_17552077             | cis       | No | Heavy Metal ATPase                   | Variiegated leaves under high light                                                                                                                                                               | N. Rolland       | 2006 |
| AT5G01410 | RSR4    | chr3_13292224             | trans     | No | Reduced Sugar Response               | Pale green, slightly chlorotic rosette leaves; Short roots; Reduced fertility<br>Dwarf; Increased branching; Downward-bending leaves; Short petioles;                                             | T. Fitzpatrick   | 2006 |
| AT5G02820 | BIN5    | chr5_638795               | cis       | No | Brassinosteroid Insensitive          | Dark-grown seedlings are de-etiolated; Insensitive to brassinosteroids                                                                                                                            | J. Chory         | 2002 |
| AT5G08370 | AtAGAL2 | chr5_2692864              | cis       | No | Alpha-Galactosidase                  | Curly rosette leaves; Late flowering                                                                                                                                                              | K. Krupinska     | 2007 |
| AT5G10330 | HISN6A  | chr4_11121261             | trans     | No | Histidine Auxotroph                  | Null; Embryo defective; Preglobular; Knockdown: Short roots                                                                                                                                       | D. Meinke        | 2003 |
| AT5G12390 | FIS1B   | chr5_3837785              | trans     | No | Fission                              | Semi-dwarf; Abnormal mitochondria and peroxisome morphology                                                                                                                                       | J. Hu            | 2008 |
| AT5G13690 | CYL1    | chr3_16326916             | trans     | No | Cyclops                              | Embryo defective; Preglobular                                                                                                                                                                     | M. Devic         | 2008 |
| AT5G14250 | FUS11   | chr5_4600661              | cis       | No | Fusca                                | Seedling lethal; Red seedlings due anthocyanin accumulation                                                                                                                                       | X. Deng          | 2001 |
| AT5G15920 | EMB2782 | chr4_6804353/chr5_5208450 | trans/cis | No | Embryo Defective                     | Embryo defective; Preglobular                                                                                                                                                                     | D. Meinke        | 2008 |
| AT5G17420 | IRX3    | chr1_29311910             | trans     | No | Irregular Xylem                      | Collapsed xylem; Cellulose-deficient secondary walls                                                                                                                                              | S. Turner        | 1999 |
| AT5G20240 | PI      | chr3_12987992             | trans     | No | Pistillata                           | Homeotic floral transformations<br>Male gametophyte defective; Homozygotes are viable; Semi-dwarf;<br>Small rosette; Reduced male fertility; Late flowering; Early senescence;                    | E. Meyerowitz    | 1994 |
| AT5G20350 | TIP1    | chr5_6876585              | cis       | No | Tip Growth Defective                 | Short, branched root hairs                                                                                                                                                                        | S. Ford          | 1993 |
| AT5G20730 | NPH4    | chr5_7044231              | cis       | No | Non-Phototropic Hypocotyl            | Altered inflorescence gravitropism; Reduced phototropism                                                                                                                                          | E. Liscum        | 2000 |
| AT5G20850 | AtRAD51 | chr1_11531283             | trans     | No | RAS Associated with Diabetes Protein | Completely male and female sterile due to defects in meiosis                                                                                                                                      | B. Reiss         | 2004 |
| AT5G23010 | MAM1    | chr5_7700167              | cis       | No | Methylthioalkylmalate Synthase       | Abnormal glucosinolate composition                                                                                                                                                                | T. Mitchell-Olds | 2001 |
| AT5G23570 | SGS3    | chr5_7938150              | cis       | No | Suppressor of Gene Silencing         | Susceptible to viral infection                                                                                                                                                                    | H. Vaucheret     | 2000 |
| AT5G24310 | ABIL3   | chr5_8273614              | cis       | No | ABL Interactor-Like Protein          | Distorted trichomes<br>Short roots; Sensitive to concanamycin A (vacuole proton pump inhibitor)                                                                                                   | J. Uhrig         | 2010 |
| AT5G26240 | CLC-D   | chr5_9190048              | cis       | No | Chloride Channel D                   | inhibitor)                                                                                                                                                                                        | U. Ludwig        | 2007 |
| AT5G34850 | PAP26   | chr5_13108258             | cis       | No | Purple Acid Phosphatase              | Low phosphate levels; Sensitive to phosphate starvation                                                                                                                                           | W. Plaxton       | 2010 |
| AT5G35840 | PHYC    | chr5_14009659             | cis       | No | Phytochrome C                        | Long hypocotyl under red light                                                                                                                                                                    | P. Quail         | 2002 |
| AT5G37055 | SEF     | chr5_14642272             | cis       | No | Serrated Leaves and Early Flowering  | Serrated leaves; Increased petal number; Small siliques; Early flowering                                                                                                                          | I. Lee           | 2007 |
| AT5G39710 | EMB2745 | chr5_15895781             | cis       | No | Embryo Defective                     | Embryo defective; Cotyledon                                                                                                                                                                       | D. Meinke        | 2003 |
| AT5G41150 | UVH1    | chr5_16469400             | cis       | No | Ultraviolet Hypersensitive           | Early senescence; Sensitive to UV light and ionizing radiation                                                                                                                                    | D. Mount         | 2000 |
| AT5G42790 | ARS5    | chr3_15887691             | trans     | No | Arsenic Tolerance                    | Resistant to arsenic<br>Semi-dwarf; Increased branching; Few rosette leaves; Distorted, pale green leaves; Reduced fertility; Sensitive to high temperature; Lethal when grown on nutrient plates | J. Schroeder     | 2009 |
| AT5G43940 | HOT5    | chr5_17684842             | cis       | No | Sensitive to Hot Temperatures        |                                                                                                                                                                                                   | E. Vierling      | 2008 |

|           |         |               |       |    |                                                            |                                                                                                                                                                                                       |                |      |
|-----------|---------|---------------|-------|----|------------------------------------------------------------|-------------------------------------------------------------------------------------------------------------------------------------------------------------------------------------------------------|----------------|------|
| AT5G44750 | REV1    | chr5_18049110 | cis   | No | Reversionless                                              | Sensitive to UV-B light                                                                                                                                                                               | S. Takahashi   | 2008 |
| AT5G45260 | RRS1    | chr5_18327098 | cis   | No | Resistance to <i>Ralstonia solanacearum</i>                | Susceptible to fungal infection                                                                                                                                                                       | Y. Narusaka    | 2009 |
| AT5G48670 | FEM111  | chr5_19739149 | cis   | No |                                                            | Complete female gametophyte defective<br>Dwarf; Slow growth; Slightly darker green; Short hypocotyl; Late flowering; Abnormal pavement cell morphology and microtubule development; Sensitive to salt | G. Drews       | 2006 |
| AT5G49510 | PFD3    | chr5_20080369 | cis   | No | Prefoldin                                                  | Embryo defective; Globular                                                                                                                                                                            | J. Salinas     | 2009 |
| AT5G49930 | EMB1441 | chr5_20314076 | cis   | No | Embryo Defective                                           | Dwarf; Sterile; Long telomeres; Sensitive to genotoxic stress                                                                                                                                         | D. Meinke      | 2002 |
| AT5G54260 | MRE11   | chr5_1280017  | trans | No | Meiotic Recombination                                      | Delayed endosperm cellularization; No other phenotypes detected                                                                                                                                       | P. Bundock     | 2002 |
| AT5G54650 | FH5     | chr5_21426099 | NA    | No | Formin Homology                                            | Late flowering independent of photoperiod                                                                                                                                                             | F. Berger      | 2005 |
| AT5G55170 | SUM3    | chr4_616041   | trans | No | Small Ubiquitin-Like Modifier                              | Male gametophyte defective; Rare embryo defective                                                                                                                                                     | F. Takken      | 2010 |
| AT5G55810 | AtNMNAT | chr5_22585634 | cis   | No | Nicotinate/Nicotinamide Mononucleotide Adenylyltransferase | Reduced male and female fertility                                                                                                                                                                     | H. Uchimiya    | 2007 |
| AT5G57880 | MPS1    | chr5_23449524 | cis   | No | Multipolar Spindle                                         | Short, rounded leaves; Elevated pectin and uronic acid levels in cell wall;                                                                                                                           | Z. Yang        | 2009 |
| AT5G58600 | PMR5    | chr5_23680788 | cis   | No | Powdery Mildew Resistant                                   | Resistant to fungal infection                                                                                                                                                                         | S. Sommerville | 2004 |
| AT5G60410 | AtSIZ1  | chr5_24292611 | cis   | No |                                                            | Sensitive to phosphate starvation                                                                                                                                                                     | P. Hasegawa    | 2005 |
| AT5G62310 | IRE     | chr5_25075437 | trans | No | Incomplete Root Hair Elongation                            | Short root hairs<br>Ovule abortion; Male and female gametophyte defective; Early embryo defective (inferred)                                                                                          | K. Okada       | 2002 |
| AT5G64050 | OVA3    | chr5_25633453 | cis   | No | Ovule Abortion                                             | Short primary root; Narrow cotyledons; Short hypocotyl                                                                                                                                                | D. Meinke      | 2005 |
| AT5G64440 | AtFAAH  | chr5_25766681 | cis   | No | Fatty Acid Amide Hydrolase                                 | Sensitive to DNA damaging agents; Increased intrachromosomal recombination frequency                                                                                                                  | E. Blancaflor  | 2006 |
| AT5G66130 | RAD17   | chr5_26430031 | cis   | No | Radiation Sensitive                                        |                                                                                                                                                                                                       | H. Puchta      | 2004 |

<sup>a</sup>SNP: Peak SNP in eQTL analysis; <sup>b</sup>Type: cis/trans = peak SNP located </>1Mb from expressed gene; <sup>c</sup>Replicated: eQTL replicated in Dubin collection of Swedish Accessions; <sup>d</sup>Description of mutant phenotype: Description of the mutant phenotype from relevant publication; <sup>e</sup>f: Individual involved with identification of gene responsible for mutant phenotype, along with date of publication or database release. See Materials and Methods section of Lloyd et al (2012).t for further clarification.



|           |               |       |             |          |      |                                                                                           |
|-----------|---------------|-------|-------------|----------|------|-------------------------------------------------------------------------------------------|
| AT1G17260 | chr1_5898135  | cis   | 0,57±0,09   | 1,70E-09 | 0,29 | autoinhibited-H(+)-ATPase-isoform-10                                                      |
| AT3G19390 | chr3_6722728  | cis   | 0,57±0,09   | 1,71E-09 | 0,36 | Granulin-repeat-cysteine-protease-family-protein                                          |
| AT5G03180 | chr5_767404   | cis   | -0,67±0,11  | 1,72E-09 | 0,20 | RING/U-box-superfamily-protein                                                            |
| AT5G56900 | chr5_23019431 | cis   | 0,81±0,13   | 1,74E-09 | 0,12 | CwfJ-like-family-protein-/-zinc-finger-(CCCH-type)-family-protein                         |
| AT4G04490 | chr4_2238541  | cis   | -0,55±0,09  | 1,75E-09 | 0,43 | cysteine-rich-RLK-(RECEPTOR-like-protein-kinase)-36                                       |
| AT1G11420 | chr1_3852453  | cis   | -0,75±0,12  | 1,75E-09 | 0,15 | DOMAIN-OF-UNKNOWN-FUNCTION-724-2                                                          |
| AT4G27740 | chr4_13838610 | cis   | -0,52±0,09  | 1,78E-09 | 0,46 | Yippee-family-putative-zinc-binding-protein                                               |
| AT2G11000 | chr2_4347440  | cis   | 0,79±0,13   | 1,80E-09 | 0,18 | MAK10-homologue                                                                           |
| AT1G08350 | chr1_2658328  | cis   | -0,67±0,11  | 1,80E-09 | 0,28 | Endomembrane-protein-70-protein-family                                                    |
| AT1G15000 | chr1_5139089  | cis   | 0,69±0,12   | 1,81E-09 | 0,21 | serine-carboxypeptidase-like-50                                                           |
| AT5G55460 | chr5_22470885 | cis   | -0,93±0,15  | 1,81E-09 | 0,08 | Bifunctional-inhibitor/lipid-transfer-protein/seed-storage-2S-albumin-superfamily-protein |
| AT4G07950 | chr2_1267472  | trans | -0,87±0,14  | 1,82E-09 | 0,11 | DNA-directed-RNA-polymerase,-subunit-M,-archaeal                                          |
| AT1G56440 | chr1_21137671 | cis   | -0,52±0,09  | 1,82E-09 | 0,46 | Tetratricopeptide-repeat-(TPR)-like-superfamily-protein                                   |
| AT5G43822 | chr5_17615905 | cis   | -0,52±0,09  | 1,82E-09 | 0,42 | Pentatricopeptide-repeat-(PPR)-superfamily-protein                                        |
| AT1G63245 | chr1_23460503 | cis   | 0,65±0,11   | 1,84E-09 | 0,19 | CLAVATA3/ESR-RELATED-14                                                                   |
| AT1G08030 | chr1_2492448  | cis   | -0,61±0,1   | 1,86E-09 | 0,24 | tyrosylprotein-sulfotransferase                                                           |
| AT2G02400 | chr2_630968   | cis   | -0,64±0,11  | 1,86E-09 | 0,19 | NAD(P)-binding-Rossmann-fold-superfamily-protein                                          |
| AT5G45520 | chr5_18453651 | cis   | 0,55±0,09   | 1,87E-09 | 0,34 | Leucine-rich-repeat-(LRR)-family-protein                                                  |
| AT1G72030 | chr1_27110891 | cis   | -0,54±0,09  | 1,87E-09 | 0,42 | Acyl-CoA-N-acyltransferases-(NAT)-superfamily-protein                                     |
| AT1G16310 | chr1_5577794  | cis   | -0,54±0,09  | 1,91E-09 | 0,37 | Cation-efflux-family-protein                                                              |
| AT1G65610 | chr1_24395482 | cis   | 0,78±0,13   | 1,91E-09 | 0,14 | Six-hairpin-glycosidases-superfamily-protein                                              |
| AT4G17010 | chr4_9576056  | cis   | 0,56±0,09   | 1,91E-09 | 0,31 |                                                                                           |
| AT2G19310 | chr2_8370278  | cis   | 0,57±0,1    | 1,93E-09 | 0,31 | HSP20-like-chaperones-superfamily-protein                                                 |
| AT4G15200 | chr4_8666801  | cis   | -0,87±0,14  | 1,99E-09 | 0,09 | formin-3                                                                                  |
| AT1G29150 | chr1_10178929 | cis   | -0,53±0,09  | 2,00E-09 | 0,43 | non-ATPase-subunit-9                                                                      |
| AT1G76300 | chr1_28610141 | cis   | -0,55±0,09  | 2,01E-09 | 0,34 | snRNP-core-protein-SMD3                                                                   |
| AT1G63110 | chr1_23404953 | cis   | 0,61±0,1    | 2,02E-09 | 0,21 | GPI-transamidase-subunit-PIG-U                                                            |
| AT1G22403 | chr1_7907579  | cis   | -01,02±0,17 | 2,04E-09 | 0,06 | other-RNA                                                                                 |
| AT1G14900 | chr1_5138651  | cis   | -0,56±0,09  | 2,04E-09 | 0,39 | high-mobility-group-A                                                                     |
| AT5G48560 | chr5_19688512 | cis   | 0,53±0,09   | 2,05E-09 | 0,45 | basic-helix-loop-helix-(bHLH)-DNA-binding-superfamily-protein                             |
| AT2G30280 | chr2_12910878 | cis   | -0,54±0,09  | 2,08E-09 | 0,38 | RNA-directed-DNA-methylation-4                                                            |
| AT1G58122 | chr5_9764016  | trans | -0,69±0,12  | 2,09E-09 | 0,16 | conserved-peptide-upstream-open-reading-frame-45                                          |
| AT2G21080 | chr2_9038933  | cis   | -0,8±0,13   | 2,09E-09 | 0,14 |                                                                                           |
| AT1G53790 | chr1_20083314 | cis   | -0,81±0,14  | 2,09E-09 | 0,14 | F-box-and-associated-interaction-domains-containing-protein                               |

|           |               |       |            |          |      |                                                                                    |
|-----------|---------------|-------|------------|----------|------|------------------------------------------------------------------------------------|
| AT5G20730 | chr5_7044231  | cis   | -0,75±0,13 | 2,12E-09 | 0,14 | Transcriptional-factor-B3-family-protein-/-auxin-responsive-factor-AUX/IAA-related |
| AT5G36260 | chr5_14291357 | cis   | 0,51±0,08  | 2,12E-09 | 0,49 | Eukaryotic-aspartyl-protease-family-protein                                        |
| AT5G61865 | chr5_24848242 | cis   | -0,87±0,15 | 2,13E-09 | 0,09 |                                                                                    |
| AT4G37970 | chr4_17850377 | cis   | -0,62±0,1  | 2,13E-09 | 0,21 | cinnamyl-alcohol-dehydrogenase-6                                                   |
| AT4G25020 | chr4_12862378 | cis   | -0,51±0,09 | 2,16E-09 | 0,46 | D111/G-patch-domain-containing-protein                                             |
| AT5G64440 | chr5_25766681 | cis   | 0,6±0,1    | 2,17E-09 | 0,24 | fatty-acid-amide-hydrolase                                                         |
| AT2G29480 | chr2_12631663 | cis   | -0,51±0,09 | 2,20E-09 | 0,41 | glutathione-S-transferase-tau-2                                                    |
| AT5G21070 | chr5_7150277  | cis   | -0,62±0,1  | 2,24E-09 | 0,23 |                                                                                    |
| AT4G21630 | chr4_11487432 | cis   | 0,88±0,15  | 2,25E-09 | 0,09 | Subtilase-family-protein                                                           |
| AT1G21270 | chr1_7447447  | cis   | -0,75±0,13 | 2,26E-09 | 0,13 | wall-associated-kinase-2                                                           |
| AT1G05730 | chr1_1719028  | cis   | -0,68±0,11 | 2,27E-09 | 0,24 | Eukaryotic-protein-of-unknown-function-(DUF842)                                    |
| AT1G10095 | chr1_3314223  | cis   | 0,87±0,15  | 2,27E-09 | 0,10 | Protein-prenyltransferase-superfamily-protein                                      |
| AT5G46390 | chr5_18819603 | cis   | 0,8±0,13   | 2,27E-09 | 0,12 | Peptidase-S41-family-protein                                                       |
| AT3G48850 | chr5_19013106 | trans | -0,75±0,13 | 2,27E-09 | 0,14 | phosphate-transporter-3;2                                                          |
| AT4G39366 | chr4_18305704 | cis   | -0,79±0,13 | 2,30E-09 | 0,11 | snoRNA                                                                             |
| AT1G21120 | chr1_7399114  | cis   | -0,64±0,11 | 2,30E-09 | 0,21 | O-methyltransferase-family-protein                                                 |
| AT4G10620 | chr4_6564358  | cis   | -0,52±0,09 | 2,35E-09 | 0,54 | P-loop-containing-nucleoside-triphosphate-hydrolases-superfamily-protein           |
| AT5G66490 | chr5_26547716 | cis   | -0,98±0,16 | 2,37E-09 | 0,08 |                                                                                    |
| AT5G59210 | chr5_23893941 | cis   | -0,71±0,12 | 2,39E-09 | 0,15 | myosin-heavy-chain-related                                                         |
| AT2G22980 | chr2_9779362  | cis   | -0,53±0,09 | 2,42E-09 | 0,46 | serine-carboxypeptidase-like-13                                                    |
| AT1G71920 | chr4_11121261 | trans | 0,87±0,15  | 2,45E-09 | 0,11 | HISTIDINE-BIOSYNTHESIS-6B                                                          |
| AT2G18990 | chr2_8235442  | cis   | 0,64±0,11  | 2,48E-09 | 0,18 | thioredoxin-domain-containing-protein-9-homolog                                    |
| AT3G62400 | chr3_23089676 | cis   | -0,69±0,11 | 2,48E-09 | 0,15 |                                                                                    |
| AT3G18535 | chr3_6375145  | cis   | 0,69±0,12  | 2,48E-09 | 0,17 | tubulin-tyrosine-ligases                                                           |
| AT1G61230 | chr1_22577460 | cis   | 0,54±0,09  | 2,48E-09 | 0,31 | Mannose-binding-lectin-superfamily-protein                                         |
| AT1G20490 | chr1_7098732  | cis   | -0,85±0,14 | 2,50E-09 | 0,11 | AMP-dependent-synthetase-and-ligase-family-protein                                 |
| AT1G69430 | chr1_26098393 | cis   | -0,53±0,09 | 2,52E-09 | 0,40 |                                                                                    |
| AT2G43190 | chr2_17956198 | cis   | 0,89±0,15  | 2,56E-09 | 0,10 | ribonuclease-P-family-protein                                                      |
| AT3G52072 | chr3_19311464 | cis   | 0,83±0,14  | 2,57E-09 | 0,11 | other-RNA                                                                          |
| AT3G07570 | chr3_2420114  | cis   | 0,58±0,1   | 2,60E-09 | 0,31 | Cytochrome-b561/ferric-reductase-transmembrane-with-DOMON-related-domain           |
| AT3G21300 | chr3_7498122  | cis   | 0,87±0,15  | 2,61E-09 | 0,09 | RNA-methyltransferase-family-protein                                               |
| AT1G69750 | chr1_26228492 | cis   | -0,73±0,12 | 2,63E-09 | 0,15 | cytochrome-c-oxidase-19-2                                                          |
| AT2G32430 | chr2_13770653 | cis   | -0,58±0,1  | 2,63E-09 | 0,27 | Galactosyltransferase-family-protein                                               |
| AT1G59950 | chr1_22070099 | cis   | -0,54±0,09 | 2,64E-09 | 0,32 | NAD(P)-linked-oxidoreductase-superfamily-protein                                   |

|           |               |     |            |          |      |                                                                                  |
|-----------|---------------|-----|------------|----------|------|----------------------------------------------------------------------------------|
| AT4G13460 | chr4_7823970  | cis | 0,57±0,1   | 2,67E-09 | 0,27 | SU(VAR)3-9-homolog-9                                                             |
| AT4G14610 | chr4_8383533  | cis | 0,73±0,12  | 2,69E-09 | 0,31 |                                                                                  |
| AT1G27190 | chr1_9448006  | cis | -0,52±0,09 | 2,70E-09 | 0,51 | Leucine-rich-repeat-protein-kinase-family-protein                                |
| AT5G20720 | chr5_7017067  | cis | 0,77±0,13  | 2,70E-09 | 0,14 | chaperonin-20                                                                    |
| AT4G04293 | chr4_2078441  | cis | -0,91±0,15 | 2,72E-09 | 0,11 | transposable-element-gene                                                        |
| AT4G31100 | chr4_15116617 | cis | 0,63±0,11  | 2,72E-09 | 0,19 | wall-associated-kinase,-putative                                                 |
| AT4G24026 | chr4_12486594 | cis | -0,63±0,11 | 2,74E-09 | 0,24 |                                                                                  |
| AT4G18593 | chr4_10238041 | cis | 0,5±0,08   | 2,76E-09 | 0,43 | dual-specificity-protein-phosphatase-related                                     |
| AT4G18220 | chr4_10086984 | cis | -0,51±0,09 | 2,78E-09 | 0,44 | Drug/metabolite-transporter-superfamily-protein                                  |
| AT1G10865 | chr1_3614901  | cis | 0,51±0,09  | 2,80E-09 | 0,51 |                                                                                  |
| AT2G22140 | chr2_9400342  | cis | 0,66±0,11  | 2,80E-09 | 0,19 | essential-meiotic-endonuclease-1B                                                |
| AT5G40290 | chr5_16093847 | cis | 0,54±0,09  | 2,83E-09 | 0,31 | HD-domain-containing-metal-dependent-phosphohydrolase-family-protein             |
| AT4G35520 | chr4_16865237 | cis | 0,53±0,09  | 2,84E-09 | 0,40 | MUTL-protein-homolog-3                                                           |
| AT3G10530 | chr3_3285914  | cis | 0,81±0,14  | 2,85E-09 | 0,14 | Transducin/WD40-repeat-like-superfamily-protein                                  |
| AT1G16210 | chr1_5586883  | cis | -0,83±0,14 | 2,86E-09 | 0,14 |                                                                                  |
| AT4G11830 | chr4_7126483  | cis | -0,7±0,12  | 2,86E-09 | 0,15 | phospholipase-D-gamma-2                                                          |
| AT1G61990 | chr1_22910904 | cis | 0,74±0,12  | 2,87E-09 | 0,14 | Mitochondrial-transcription-termination-factor-family-protein                    |
| AT2G27650 | chr2_11794485 | cis | -0,5±0,08  | 2,87E-09 | 0,51 | Ubiquitin-carboxyl-terminal-hydrolase-related-protein                            |
| AT4G38170 | chr4_17904846 | cis | -0,52±0,09 | 2,90E-09 | 0,34 | FAR1-related-sequence-9                                                          |
| AT2G31141 | chr2_13271870 | cis | 0,67±0,11  | 2,93E-09 | 0,19 |                                                                                  |
| AT1G69680 | chr1_26203727 | cis | 0,97±0,16  | 2,94E-09 | 0,07 | Mog1/PsbP/DUF1795-like-photosystem-II-reaction-center-PsbP-family-protein        |
| AT1G74290 | chr1_27934467 | cis | -0,82±0,14 | 2,95E-09 | 0,11 | alpha/beta-Hydrolases-superfamily-protein                                        |
| AT1G76050 | chr1_28534028 | cis | -0,68±0,11 | 2,95E-09 | 0,19 | Pseudouridine-synthase-family-protein                                            |
| AT2G34585 | chr2_14569936 | cis | -0,68±0,11 | 2,98E-09 | 0,18 |                                                                                  |
| AT1G69290 | chr1_26050455 | cis | 0,66±0,11  | 3,00E-09 | 0,20 | Pentatricopeptide-repeat-(PPR)-superfamily-protein                               |
| AT3G47010 | chr3_17319204 | cis | -0,58±0,1  | 3,04E-09 | 0,35 | Glycosyl-hydrolase-family-protein                                                |
| AT3G25013 | chr3_9114019  | cis | -0,53±0,09 | 3,05E-09 | 0,33 | Synaptobrevin-family-protein                                                     |
| AT5G36120 | chr5_14196522 | cis | -0,56±0,09 | 3,06E-09 | 0,45 | cofactor-assembly,-complex-C-(B6F)                                               |
| AT4G16060 | chr4_9099903  | cis | -0,52±0,09 | 3,11E-09 | 0,50 |                                                                                  |
| AT1G15080 | chr1_5171876  | cis | 0,56±0,09  | 3,12E-09 | 0,38 | lipid-phosphate-phosphatase-2                                                    |
| AT2G13100 | chr2_5390318  | cis | -0,75±0,13 | 3,15E-09 | 0,15 | Major-facilitator-superfamily-protein                                            |
| AT5G02450 | chr5_534379   | cis | -0,58±0,1  | 3,17E-09 | 0,29 | Ribosomal-protein-L36e-family-protein                                            |
| AT5G23850 | chr5_8038046  | cis | -0,87±0,15 | 3,18E-09 | 0,11 | Arabidopsis-thaliana-protein-of-unknown-function-(DUF821)                        |
| AT3G46450 | chr3_17093682 | cis | 0,56±0,09  | 3,24E-09 | 0,29 | SEC14-cytosolic-factor-family-protein-/-phosphoglyceride-transfer-family-protein |

|           |               |       |            |          |      |                                                                       |
|-----------|---------------|-------|------------|----------|------|-----------------------------------------------------------------------|
| AT1G61440 | chr1_22673235 | cis   | 0,73±0,12  | 3,24E-09 | 0,14 | S-locus-lectin-protein-kinase-family-protein                          |
| AT5G47550 | chr5_19287775 | cis   | -0,52±0,09 | 3,25E-09 | 0,38 | Cystatin/monellin-superfamily-protein                                 |
| AT5G48530 | chr5_19668014 | cis   | -0,53±0,09 | 3,25E-09 | 0,40 |                                                                       |
| AT3G20660 | chr3_7219123  | cis   | 0,92±0,16  | 3,26E-09 | 0,08 | organic-cation/carnitine-transporter4                                 |
| AT1G07420 | chr1_2290662  | cis   | -0,7±0,12  | 3,26E-09 | 0,16 | sterol-4-alpha-methyl-oxidase-2-1                                     |
| AT4G14965 | chr4_8550431  | cis   | -0,52±0,09 | 3,27E-09 | 0,50 | membrane-associated-progesterone-binding-protein-4                    |
| AT2G15050 | chr2_6512033  | cis   | -0,79±0,13 | 3,28E-09 | 0,11 | lipid-transfer-protein                                                |
| AT2G43745 | chr2_18121519 | cis   | -0,77±0,13 | 3,29E-09 | 0,15 |                                                                       |
| AT2G43535 | chr2_18076562 | cis   | -0,83±0,14 | 3,30E-09 | 0,11 | Scorpion-toxin-like-knottin-superfamily-protein                       |
| AT3G27925 | chr3_10365435 | cis   | -0,53±0,09 | 3,35E-09 | 0,40 | DegP-protease-1                                                       |
| AT4G03415 | chr4_1471041  | cis   | -0,82±0,14 | 3,35E-09 | 0,13 | Protein-phosphatase-2C-family-protein                                 |
| AT2G19490 | chr3_13440600 | trans | 0,77±0,13  | 3,37E-09 | 0,13 | recA-DNA-recombination-family-protein                                 |
| AT1G54260 | chr1_20255602 | cis   | -0,93±0,16 | 3,38E-09 | 0,09 | winged-helix-DNA-binding-transcription-factor-family-protein          |
| AT1G33480 | chr1_12150056 | cis   | -0,71±0,12 | 3,39E-09 | 0,19 | RING/U-box-superfamily-protein                                        |
| AT3G55700 | chr3_20671176 | cis   | -0,53±0,09 | 3,43E-09 | 0,39 | UDP-Glycosyltransferase-superfamily-protein                           |
| AT3G30875 | chr4_4508615  | trans | 0,6±0,1    | 3,44E-09 | 0,26 |                                                                       |
| AT5G37000 | chr5_14618076 | cis   | -0,84±0,14 | 3,45E-09 | 0,13 | Exostosin-family-protein                                              |
| AT3G23610 | chr3_8479578  | cis   | -0,59±0,1  | 3,46E-09 | 0,28 | dual-specificity-protein-phosphatase-1                                |
| AT1G31360 | chr1_11236608 | cis   | 0,8±0,14   | 3,51E-09 | 0,11 | RECQ-helicase-L2                                                      |
| AT1G35670 | chr1_13203648 | cis   | -0,73±0,12 | 3,51E-09 | 0,13 | calcium-dependent-protein-kinase-2                                    |
| AT4G01350 | chr5_24128930 | trans | 0,98±0,17  | 3,52E-09 | 0,08 | Cysteine/Histidine-rich-C1-domain-family-protein                      |
| AT1G36622 | chr1_13829306 | cis   | -0,62±0,1  | 3,53E-09 | 0,21 |                                                                       |
| AT4G13345 | chr4_7762558  | cis   | -0,54±0,09 | 3,53E-09 | 0,37 | Serinc-domain-containing-serine-and-sphingolipid-biosynthesis-protein |
| AT4G13100 | chr4_7638618  | cis   | -0,55±0,09 | 3,54E-09 | 0,32 | RING/U-box-superfamily-protein                                        |
| AT5G58595 | chr5_23677967 | cis   | 0,6±0,1    | 3,54E-09 | 0,26 | snoRNA                                                                |
| AT1G62010 | chr1_22908815 | cis   | -0,87±0,15 | 3,55E-09 | 0,09 | Mitochondrial-transcription-termination-factor-family-protein         |
| AT2G44210 | chr2_18281511 | cis   | 0,82±0,14  | 3,55E-09 | 0,11 | Protein-of-Unknown-Function-(DUF239)                                  |
| AT4G00970 | chr4_420840   | cis   | -0,54±0,09 | 3,55E-09 | 0,38 | cysteine-rich-RLK-(RECEPTOR-like-protein-kinase)-41                   |
| AT5G10620 | chr5_3351841  | cis   | 0,64±0,11  | 3,56E-09 | 0,16 | methyltransferases                                                    |
| AT1G78780 | chr1_29615953 | cis   | 0,64±0,11  | 3,61E-09 | 0,19 | pathogenesis-related-family-protein                                   |
| AT4G34550 | chr4_16496186 | cis   | 0,58±0,1   | 3,68E-09 | 0,31 |                                                                       |
| AT4G22720 | chr4_11939573 | cis   | -0,5±0,09  | 3,70E-09 | 0,46 | Actin-like-ATPase-superfamily-protein                                 |
| AT1G55720 | chr1_20822857 | cis   | -0,99±0,17 | 3,77E-09 | 0,08 | cation-exchanger-6                                                    |
| AT3G60950 | chr3_22544900 | cis   | 0,67±0,11  | 3,81E-09 | 0,16 | C2-calcium/lipid-binding-endonuclease/exonuclease/phosphatase         |

|           |               |       |            |          |      |                                                                             |
|-----------|---------------|-------|------------|----------|------|-----------------------------------------------------------------------------|
| AT5G34850 | chr5_13108258 | cis   | -0,53±0,09 | 3,84E-09 | 0,45 | purple-acid-phosphatase-26                                                  |
| AT5G04320 | chr5_1212665  | cis   | -0,51±0,09 | 3,85E-09 | 0,39 | Shugoshin-C-terminus                                                        |
| AT1G66700 | chr1_24876630 | cis   | 0,48±0,08  | 3,86E-09 | 0,33 | S-adenosyl-L-methionine-dependent-methyltransferases-superfamily-protein    |
| AT4G01460 | chr4_616803   | cis   | 0,53±0,09  | 3,86E-09 | 0,44 | basic-helix-loop-helix-(bHLH)-DNA-binding-superfamily-protein               |
| AT5G62575 | chr5_25117753 | cis   | -0,58±0,1  | 3,87E-09 | 0,26 |                                                                             |
| AT1G65590 | chr1_24387301 | cis   | -0,63±0,11 | 3,88E-09 | 0,22 | beta-hexosaminidase-3                                                       |
| AT5G04710 | chr5_1360240  | cis   | 0,71±0,12  | 3,95E-09 | 0,16 | Zn-dependent-exopeptidases-superfamily-protein                              |
| AT2G43500 | chr2_18060212 | cis   | 0,58±0,1   | 3,96E-09 | 0,25 | Plant-regulator-RWP-RK-family-protein                                       |
| AT3G48650 | chr3_18028229 | cis   | -0,91±0,16 | 3,96E-09 | 0,11 |                                                                             |
| AT2G24650 | chr2_10466568 | cis   | 0,52±0,09  | 3,97E-09 | 0,40 | DNA-binding;DNA-binding;sequence-specific-DNA-binding-transcription-factors |
| AT5G42690 | chr5_17120893 | cis   | -0,63±0,11 | 3,99E-09 | 0,18 | Protein-of-unknown-function,-DUF547                                         |
| AT3G26922 | chr3_9925133  | cis   | 0,52±0,09  | 4,01E-09 | 0,43 | F-box/RNI-like-superfamily-protein                                          |
| AT1G70985 | chr1_26766121 | cis   | 0,59±0,1   | 4,02E-09 | 0,35 | hydroxyproline-rich-glycoprotein-family-protein                             |
| AT1G52910 | chr1_19695673 | cis   | 0,62±0,11  | 4,06E-09 | 0,21 | Protein-of-unknown-function-(DUF1218)                                       |
| AT3G15260 | chr3_5127140  | cis   | -0,91±0,15 | 4,06E-09 | 0,10 | Protein-phosphatase-2C-family-protein                                       |
| AT4G19010 | chr4_10413907 | cis   | -0,51±0,09 | 4,09E-09 | 0,54 | AMP-dependent-synthetase-and-ligase-family-protein                          |
| AT4G13120 | chr4_7646168  | cis   | -0,96±0,16 | 4,12E-09 | 0,08 | transposable-element-gene                                                   |
| AT4G01860 | chr4_817109   | cis   | -0,58±0,1  | 4,18E-09 | 0,28 | Transducin-family-protein/-WD-40-repeat-family-protein                      |
| AT2G21260 | chr2_9106508  | cis   | -0,57±0,1  | 4,21E-09 | 0,29 | NAD(P)-linked-oxidoreductase-superfamily-protein                            |
| AT2G24680 | chr2_10497318 | cis   | 0,79±0,14  | 4,21E-09 | 0,11 | transcriptional-factor-B3-family-protein                                    |
| AT1G74180 | chr1_27900760 | cis   | -0,7±0,12  | 4,23E-09 | 0,15 | receptor-like-protein-14                                                    |
| AT5G28080 | chr5_10117026 | cis   | 0,6±0,1    | 4,23E-09 | 0,26 | Protein-kinase-superfamily-protein                                          |
| AT1G02850 | chr1_628630   | cis   | 0,61±0,1   | 4,25E-09 | 0,26 | beta-glucosidase-11                                                         |
| AT5G56130 | chr5_22722445 | cis   | -0,54±0,09 | 4,32E-09 | 0,29 | Transducin/WD40-repeat-like-superfamily-protein                             |
| AT1G06640 | chr1_2051561  | cis   | -0,75±0,13 | 4,37E-09 | 0,12 | 2-oxoglutarate-(2OG)-and-Fe(II)-dependent-oxygenase-superfamily-protein     |
| AT2G34840 | chr2_14700261 | cis   | -0,89±0,15 | 4,40E-09 | 0,10 | Coatomer-epsilon-subunit                                                    |
| AT5G53830 | chr5_21857638 | cis   | -0,57±0,1  | 4,41E-09 | 0,27 | VQ-motif-containing-protein                                                 |
| AT4G27060 | chr4_13571868 | cis   | 0,58±0,1   | 4,44E-09 | 0,26 | ARM-repeat-superfamily-protein                                              |
| AT1G50500 | chr1_18716339 | cis   | 0,51±0,09  | 4,45E-09 | 0,46 | Membrane-trafficking-VPS53-family-protein                                   |
| AT4G27070 | chr1_11506651 | trans | 0,66±0,11  | 4,47E-09 | 0,21 | tryptophan-synthase-beta-subunit-2                                          |
| AT2G35075 | chr2_14776040 | cis   | 0,54±0,09  | 4,47E-09 | 0,34 |                                                                             |
| AT4G11410 | chr4_6946044  | cis   | 0,82±0,14  | 4,48E-09 | 0,11 | NAD(P)-binding-Rossmann-fold-superfamily-protein                            |
| AT3G50100 | chr3_18578397 | cis   | 0,88±0,15  | 4,49E-09 | 0,09 | small-RNA-degrading-nuclease-1                                              |
| AT5G43330 | chr5_17391678 | cis   | 0,58±0,1   | 4,49E-09 | 0,25 | Lactate/malate-dehydrogenase-family-protein                                 |

|           |               |       |            |          |      |                                                                            |
|-----------|---------------|-------|------------|----------|------|----------------------------------------------------------------------------|
| AT2G24040 | chr2_10225798 | cis   | 0,63±0,11  | 4,56E-09 | 0,27 | Low-temperature-and-salt-responsive-protein-family                         |
| AT1G63390 | chr1_23493092 | cis   | -0,5±0,09  | 4,59E-09 | 0,45 | FAD/NAD(P)-binding-oxidoreductase-family-protein                           |
| AT2G06510 | chr2_2336551  | trans | 01,07±0,18 | 4,59E-09 | 0,10 | replication-protein-A-1A                                                   |
| AT2G37050 | chr2_15566680 | cis   | 0,55±0,09  | 4,59E-09 | 0,33 | Leucine-rich-repeat-protein-kinase-family-protein                          |
| AT5G39940 | chr5_15987774 | cis   | -0,74±0,13 | 4,59E-09 | 0,12 | FAD/NAD(P)-binding-oxidoreductase-family-protein                           |
| AT5G27220 | chr5_9580241  | cis   | -0,57±0,1  | 4,62E-09 | 0,26 | Frigida-like-protein                                                       |
| AT3G32920 | chr1_10156018 | trans | 0,9±0,15   | 4,63E-09 | 0,10 | P-loop-containing-nucleoside-triphosphate-hydrolases-superfamily-protein   |
| AT1G60000 | chr1_22094609 | cis   | -0,86±0,15 | 4,64E-09 | 0,09 | RNA-binding-(RRM/RBD/RNP-motifs)-family-protein                            |
| AT5G23950 | chr5_8082568  | cis   | 0,57±0,1   | 4,65E-09 | 0,56 | Calcium-dependent-lipid-binding-(CaLB-domain)-family-protein               |
| AT1G17790 | chr1_6122391  | cis   | -0,73±0,12 | 4,66E-09 | 0,14 | DNA-binding-bromodomain-containing-protein                                 |
| AT1G67440 | chr1_25265828 | cis   | 0,5±0,09   | 4,68E-09 | 0,49 | Minichromosome-maintenance-(MCM2/3/5)-family-protein                       |
| AT5G48480 | chr5_19664194 | cis   | 0,53±0,09  | 4,68E-09 | 0,39 | Lactoylglutathione-lyase-/glyoxalase-I-family-protein                      |
| AT5G46260 | chr5_18853814 | trans | 0,88±0,15  | 4,70E-09 | 0,09 | disease-resistance-protein-(TIR-NBS-LRR-class)-family                      |
| AT5G27860 | chr5_9874674  | cis   | 0,71±0,12  | 4,74E-09 | 0,16 |                                                                            |
| AT1G62305 | chr1_23026723 | cis   | -0,66±0,11 | 4,75E-09 | 0,19 | Core-2/I-branching-beta-1,6-N-acetylglucosaminyltransferase-family-protein |
| AT2G43950 | chr3_17419622 | trans | 0,54±0,09  | 4,75E-09 | 0,31 | chloroplast-outer-envelope-protein-37                                      |
| AT4G13660 | chr4_7943892  | cis   | 01,06±0,18 | 4,75E-09 | 0,06 | pinorensinol-reductase-2                                                   |
| AT1G51830 | chr5_24043295 | trans | 0,5±0,09   | 4,75E-09 | 0,44 | Leucine-rich-repeat-protein-kinase-family-protein                          |
| AT2G46490 | chr2_19078005 | cis   | -0,5±0,09  | 4,76E-09 | 0,46 |                                                                            |
| AT5G01040 | chr5_33234    | cis   | -0,63±0,11 | 4,88E-09 | 0,19 | laccase-8                                                                  |
| AT2G29160 | chr2_12504339 | cis   | 0,71±0,12  | 4,88E-09 | 0,15 |                                                                            |
| AT3G25900 | chr3_9480243  | cis   | 0,66±0,11  | 4,89E-09 | 0,19 | Homocysteine-S-methyltransferase-family-protein                            |
| AT4G27060 | chr1_11506730 | trans | 0,63±0,11  | 4,90E-09 | 0,24 | ARM-repeat-superfamily-protein                                             |
| AT1G62040 | chr1_22932927 | cis   | 0,52±0,09  | 4,91E-09 | 0,66 | Ubiquitin-like-superfamily-protein                                         |
| AT4G19380 | chr4_10573108 | cis   | 0,5±0,09   | 4,92E-09 | 0,39 | Long-chain-fatty-alcohol-dehydrogenase-family-protein                      |
| AT5G09840 | chr5_3058074  | cis   | 0,55±0,09  | 4,97E-09 | 0,41 | Putative-endonuclease-or-glycosyl-hydrolase                                |
| AT3G51880 | chr3_19248505 | cis   | -0,57±0,1  | 5,03E-09 | 0,28 | high-mobility-group-B1                                                     |
| AT3G23480 | chr3_8431540  | cis   | 0,71±0,12  | 5,03E-09 | 0,17 | Cyclopropane-fatty-acyl-phospholipid-synthase                              |
| AT3G13845 | chr3_4559312  | cis   | 0,51±0,09  | 5,04E-09 | 0,37 |                                                                            |
| AT3G05230 | chr3_1492253  | cis   | 0,5±0,09   | 5,06E-09 | 0,44 | Signal-peptidase-subunit                                                   |
| AT5G14680 | chr1_3359097  | trans | -0,62±0,11 | 5,10E-09 | 0,21 | Adenine-nucleotide-alpha-hydrolases-like-superfamily-protein               |
| AT1G16635 | chr1_5686292  | cis   | -0,51±0,09 | 5,14E-09 | 0,56 |                                                                            |
| AT3G53370 | chr3_19779802 | cis   | 0,53±0,09  | 5,14E-09 | 0,54 | S1FA-like-DNA-binding-protein                                              |
| AT2G12550 | chr2_5118537  | cis   | 0,54±0,09  | 5,18E-09 | 0,51 | ubiquitin-associated-(UBA)/TS-N-domain-containing-protein                  |

|           |               |       |            |          |      |                                                          |
|-----------|---------------|-------|------------|----------|------|----------------------------------------------------------|
| AT1G16340 | chr1_5521223  | trans | -0,91±0,16 | 5,21E-09 | 0,09 | Aldolase-superfamily-protein                             |
| AT1G52710 | chr1_19639432 | cis   | -0,98±0,17 | 5,26E-09 | 0,07 | Rubredoxin-like-superfamily-protein                      |
| AT3G57990 | chr3_21470658 | cis   | -0,53±0,09 | 5,27E-09 | 0,51 |                                                          |
| AT5G43725 | chr5_17560200 | cis   | 0,54±0,09  | 5,29E-09 | 0,33 | other-RNA                                                |
| AT3G17250 | chr3_5894722  | cis   | 0,72±0,12  | 5,30E-09 | 0,14 | Protein-phosphatase-2C-family-protein                    |
| AT3G23110 | chr3_8227670  | cis   | 0,61±0,1   | 5,36E-09 | 0,20 | receptor-like-protein-37                                 |
| AT2G26980 | chr2_11518603 | cis   | 0,61±0,11  | 5,40E-09 | 0,24 | CBL-interacting-protein-kinase-3                         |
| AT4G04830 | chr4_2445653  | cis   | -0,61±0,11 | 5,43E-09 | 0,29 | methionine-sulfoxide-reductase-B5                        |
| AT4G07825 | chr4_3274080  | trans | 0,61±0,1   | 5,46E-09 | 0,27 |                                                          |
| AT3G50845 | chr3_18901574 | cis   | -0,52±0,09 | 5,46E-09 | 0,42 | Protein-of-unknown-function-(DUF59)                      |
| AT2G02240 | chr2_593420   | cis   | 0,51±0,09  | 5,55E-09 | 0,39 | F-box-family-protein                                     |
| AT3G17590 | chr3_6019674  | cis   | -01,18±0,2 | 5,55E-09 | 0,06 | transcription-regulatory-protein-SNF5,-putative-(BSH)    |
| AT1G13270 | chr1_4544969  | cis   | 0,59±0,1   | 5,62E-09 | 0,27 | methionine-aminopeptidase-1B                             |
| AT5G38840 | chr5_15547507 | cis   | 0,51±0,09  | 5,65E-09 | 0,44 | SMAD/FHA-domain-containing-protein-                      |
| AT5G39710 | chr5_15895781 | cis   | 0,63±0,11  | 5,68E-09 | 0,22 | Tetratricopeptide-repeat-(TPR)-like-superfamily-protein  |
| AT2G14835 | chr2_6381561  | cis   | 0,5±0,09   | 5,68E-09 | 0,55 | RING/U-box-superfamily-protein                           |
| AT5G25450 | chr5_8855080  | cis   | 0,77±0,13  | 5,69E-09 | 0,12 | Cytochrome-bd-ubiquinol-oxidase,-14kDa-subunit           |
| AT3G01790 | chr3_260335   | cis   | 0,87±0,15  | 5,73E-09 | 0,09 | Ribosomal-protein-L13-family-protein                     |
| AT3G26150 | chr3_9567178  | cis   | 0,55±0,09  | 5,74E-09 | 0,34 | cytochrome-P450,-family-71,-subfamily-B,-polypeptide-16  |
| AT1G15880 | chr1_5459026  | cis   | 0,87±0,15  | 5,78E-09 | 0,09 | golgi-snare-11                                           |
| AT1G14490 | chr1_4959533  | cis   | -0,52±0,09 | 5,80E-09 | 0,42 | Predicted-AT-hook-DNA-binding-family-protein             |
| AT3G23470 | chr3_8431540  | cis   | 0,72±0,12  | 5,81E-09 | 0,17 | Cyclopropane-fatty-acyl-phospholipid-synthase            |
| AT3G59410 | chr3_21950171 | cis   | 0,63±0,11  | 5,83E-09 | 0,21 | protein-kinase-family-protein                            |
| AT1G26920 | chr1_9328093  | cis   | 0,55±0,1   | 5,88E-09 | 0,33 |                                                          |
| AT2G47370 | chr2_19443291 | cis   | -0,52±0,09 | 5,89E-09 | 0,46 | Calcium-dependent-phosphotriesterase-superfamily-protein |
| AT2G41650 | chr2_17359821 | cis   | -0,52±0,09 | 5,96E-09 | 0,36 |                                                          |
| AT1G66540 | chr1_24825520 | cis   | -0,59±0,1  | 5,99E-09 | 0,21 | Cytochrome-P450-superfamily-protein                      |
| AT1G25083 | chr1_8838392  | cis   | -0,49±0,08 | 6,02E-09 | 0,49 | Glutamine-amidotransferase-type-1-family-protein         |
| AT1G05550 | chr1_1641888  | cis   | 0,54±0,09  | 6,09E-09 | 0,47 | Protein-of-unknown-function-(DUF295)                     |
| AT3G61560 | chr3_22777968 | cis   | -0,62±0,11 | 6,10E-09 | 0,24 | Reticulon-family-protein                                 |
| AT3G60164 | chr3_22231957 | cis   | -0,54±0,09 | 6,11E-09 | 0,50 |                                                          |
| AT4G02460 | chr4_1074131  | cis   | 0,81±0,14  | 6,13E-09 | 0,11 | DNA-mismatch-repair-protein,-putative                    |
| AT5G22510 | chr5_7476949  | cis   | -0,55±0,09 | 6,13E-09 | 0,38 | alkaline/neutral-invertase                               |
| AT4G13630 | chr4_7937315  | cis   | 0,53±0,09  | 6,17E-09 | 0,30 | Protein-of-unknown-function,-DUF593                      |

|           |               |       |            |          |      |                                                                |
|-----------|---------------|-------|------------|----------|------|----------------------------------------------------------------|
| AT3G23100 | chr3_8218557  | cis   | -0,51±0,09 | 6,22E-09 | 0,36 | homolog-of-human-DNA-ligase-iv-binding-protein-XRCC4           |
| AT2G36050 | chr2_15138413 | cis   | 0,5±0,09   | 6,29E-09 | 0,50 | ovate-family-protein-15                                        |
| AT3G26070 | chr3_9527159  | cis   | -0,54±0,09 | 6,30E-09 | 0,34 | Plastid-lipid-associated-protein-PAP-/fibrillin-family-protein |
| AT1G49930 | chr1_18484994 | cis   | -0,79±0,14 | 6,35E-09 | 0,11 |                                                                |
| AT1G64600 | chr1_23995767 | cis   | 0,52±0,09  | 6,35E-09 | 0,42 | methyltransferases;copper-ion-binding                          |
| AT1G04985 | chr1_1418552  | cis   | -0,86±0,15 | 6,54E-09 | 0,09 |                                                                |
| AT1G63420 | chr1_23517242 | cis   | 0,55±0,1   | 6,58E-09 | 0,29 | Arabidopsis-thaliana-protein-of-unknown-function-(DUF821)      |
| AT4G27852 | chr4_13869975 | cis   | -0,88±0,15 | 6,61E-09 | 0,09 |                                                                |
| AT4G36840 | chr4_17354710 | cis   | -0,8±0,14  | 6,63E-09 | 0,11 | Galactose-oxidase/kelch-repeat-superfamily-protein             |
| AT1G76530 | chr1_28720156 | cis   | -0,49±0,08 | 6,64E-09 | 0,45 | Auxin-efflux-carrier-family-protein                            |
| AT4G12300 | chr4_7310109  | cis   | 0,56±0,1   | 6,67E-09 | 0,33 | cytochrome-P450,-family-706,-subfamily-A,-polypeptide-4        |
| AT3G01740 | chr3_269343   | cis   | -0,73±0,13 | 6,76E-09 | 0,15 | Mitochondrial-ribosomal-protein-L37                            |
| AT5G07880 | chr3_10393637 | trans | 0,5±0,09   | 6,83E-09 | 0,38 | synaptosomal-associated-protein-SNAP25-like-29                 |
| AT5G23070 | chr5_7645645  | trans | 0,64±0,11  | 6,87E-09 | 0,25 | Thymidine-kinase                                               |
| AT3G26165 | chr3_9571909  | cis   | 0,55±0,09  | 6,93E-09 | 0,31 |                                                                |
| AT2G20650 | chr2_8909014  | cis   | 0,52±0,09  | 7,02E-09 | 0,40 | RING/U-box-superfamily-protein                                 |
| AT3G21790 | chr1_3859014  | trans | 0,51±0,09  | 7,03E-09 | 0,66 | UDP-Glycosyltransferase-superfamily-protein                    |
| AT5G49510 | chr5_20080369 | cis   | -0,79±0,14 | 7,04E-09 | 0,11 | prefoldin-3                                                    |
| AT3G21100 | chr1_28105103 | trans | 0,54±0,09  | 7,06E-09 | 0,29 | RNA-binding-(RRM/RBD/RNP-motifs)-family-protein                |
| AT4G19350 | chr4_10562571 | cis   | -0,56±0,1  | 7,09E-09 | 0,28 | embryo-defective-3006                                          |
| AT1G78915 | chr1_29658052 | cis   | 0,83±0,14  | 7,10E-09 | 0,10 | Tetratricopeptide-repeat-(TPR)-like-superfamily-protein        |
| AT1G32910 | chr1_11924416 | cis   | -0,52±0,09 | 7,10E-09 | 0,38 | HXXXD-type-acyl-transferase-family-protein                     |
| AT5G14250 | chr5_4600661  | cis   | 0,55±0,09  | 7,15E-09 | 0,32 | Proteasome-component-(PCI)-domain-protein                      |
| AT1G33140 | chr1_12024011 | cis   | -0,7±0,12  | 7,18E-09 | 0,14 | Ribosomal-protein-L6-family                                    |
| AT5G19350 | chr5_6519290  | cis   | 0,53±0,09  | 7,20E-09 | 0,48 | RNA-binding-(RRM/RBD/RNP-motifs)-family-protein                |
| AT5G44730 | chr5_18046985 | cis   | 0,53±0,09  | 7,28E-09 | 0,36 | Haloacid-dehalogenase-like-hydrolase-(HAD)-superfamily-protein |
| AT4G02725 | chr4_1220128  | cis   | 0,62±0,11  | 7,28E-09 | 0,22 |                                                                |
| AT1G26900 | chr1_9322541  | cis   | -0,52±0,09 | 7,30E-09 | 0,41 | Pentatricopeptide-repeat-(PPR)-superfamily-protein             |
| AT2G37370 | chr2_15679136 | cis   | 0,55±0,09  | 7,33E-09 | 0,50 |                                                                |
| AT2G38370 | chr2_16068570 | cis   | -0,8±0,14  | 7,38E-09 | 0,12 | Plant-protein-of-unknown-function-(DUF827)                     |
| AT2G25350 | chr2_10797830 | cis   | -0,59±0,1  | 7,39E-09 | 0,38 | Phox-(PX)-domain-containing-protein                            |
| AT2G34790 | chr2_14679048 | cis   | -0,5±0,09  | 7,39E-09 | 0,42 | FAD-binding-Berberine-family-protein                           |
| AT3G08885 | chr3_2704556  | cis   | 0,86±0,15  | 7,42E-09 | 0,10 |                                                                |
| AT5G45400 | chr5_18398980 | cis   | 0,71±0,12  | 7,51E-09 | 0,15 | Replication-factor-A-protein-1-related                         |



|           |               |       |            |          |      |                                                                                            |
|-----------|---------------|-------|------------|----------|------|--------------------------------------------------------------------------------------------|
| AT1G30835 | chr1_10964549 | cis   | -0,54±0,09 | 7,52E-09 | 0,34 | transposable-element-gene                                                                  |
| AT1G24880 | chr1_8842441  | trans | 0,83±0,14  | 7,55E-09 | 0,12 | UDP-3-O-acyl-N-acetylglucosamine-deacetylase-family-protein                                |
| AT4G37210 | chr4_17514967 | cis   | -0,56±0,1  | 7,58E-09 | 0,35 | Tetratricopeptide-repeat-(TPR)-like-superfamily-protein                                    |
| AT5G41240 | chr5_16501243 | cis   | 0,66±0,11  | 7,58E-09 | 0,28 | glutathione-S-transferase-THETA-2                                                          |
| AT1G33970 | chr1_12350213 | cis   | -0,51±0,09 | 7,68E-09 | 0,34 | P-loop-containing-nucleoside-triphosphate-hydrolases-superfamily-protein                   |
| AT4G14103 | chr4_8148790  | cis   | 0,57±0,1   | 7,70E-09 | 0,29 | F-box/RNI-like-superfamily-protein                                                         |
| AT2G21800 | chr2_9293627  | cis   | 0,9±0,16   | 7,74E-09 | 0,09 | essential-meiotic-endonuclease-1A                                                          |
| AT1G64350 | chr1_23881942 | cis   | 0,53±0,09  | 7,78E-09 | 0,46 | Transducin/WD40-repeat-like-superfamily-protein                                            |
| AT2G41660 | chr2_17409805 | cis   | 0,61±0,11  | 7,79E-09 | 0,21 | Protein-of-unknown-function,-DUF617                                                        |
| AT1G74240 | chr1_27917198 | cis   | 0,55±0,1   | 7,82E-09 | 0,28 | Mitochondrial-substrate-carrier-family-protein                                             |
| AT1G23850 | chr1_8426708  | cis   | -0,67±0,12 | 7,84E-09 | 0,19 |                                                                                            |
| AT5G59250 | chr5_23903147 | cis   | 0,8±0,14   | 7,85E-09 | 0,11 | Major-facilitator-superfamily-protein                                                      |
| AT5G04880 | chr5_1456665  | cis   | -0,94±0,16 | 7,86E-09 | 0,07 |                                                                                            |
| AT3G54460 | chr3_20182082 | cis   | 0,85±0,15  | 7,87E-09 | 0,08 | SNF2-domain-containing-protein-/-helicase-domain-containing-protein-/-F-box-family-protein |
| AT3G11210 | chr3_3512810  | cis   | -0,55±0,1  | 7,87E-09 | 0,26 | SGNH-hydrolase-type-esterase-superfamily-protein                                           |
| AT2G25310 | chr2_10777579 | cis   | 0,58±0,1   | 7,91E-09 | 0,29 | Protein-of-unknown-function-(DUF2012)                                                      |
| AT1G31910 | chr5_11642972 | trans | -0,54±0,09 | 7,98E-09 | 0,42 | GHMP-kinase-family-protein                                                                 |
| AT2G25355 | chr2_10801269 | cis   | 0,59±0,1   | 8,04E-09 | 0,41 | PNAS-3-related                                                                             |
| AT3G28300 | chr3_10561937 | cis   | 0,82±0,14  | 8,06E-09 | 0,11 | Protein-of-unknown-function-(DUF677)                                                       |
| AT1G47840 | chr1_17618965 | cis   | 0,57±0,1   | 8,10E-09 | 0,24 | hexokinase-3                                                                               |
| AT5G18840 | chr5_6282597  | cis   | -0,69±0,12 | 8,11E-09 | 0,16 | Major-facilitator-superfamily-protein                                                      |
| AT3G47390 | chr3_17461680 | cis   | -0,51±0,09 | 8,18E-09 | 0,37 | cytidine/deoxycytidylate-deaminase-family-protein                                          |
| AT2G30230 | chr2_12892570 | cis   | 0,53±0,09  | 8,18E-09 | 0,31 |                                                                                            |
| AT2G25510 | chr1_2030563  | trans | -0,62±0,11 | 8,22E-09 | 0,21 |                                                                                            |
| AT3G32920 | chr1_11308596 | trans | 0,84±0,15  | 8,23E-09 | 0,10 | P-loop-containing-nucleoside-triphosphate-hydrolases-superfamily-protein                   |
| AT4G09432 | chr4_5932389  | cis   | -0,71±0,12 | 8,41E-09 | 0,16 |                                                                                            |
| AT1G12200 | chr1_4135556  | cis   | 0,71±0,12  | 8,44E-09 | 0,17 | Flavin-binding-monooxygenase-family-protein                                                |
| AT2G01720 | chr4_613562   | trans | -0,73±0,13 | 8,49E-09 | 0,14 | Ribophorin-I                                                                               |
| AT5G18060 | chr5_5978226  | cis   | 0,56±0,1   | 8,54E-09 | 0,28 | SAUR-like-auxin-responsive-protein-family-                                                 |
| AT4G37270 | chr4_17552077 | cis   | 0,54±0,09  | 8,57E-09 | 0,31 | heavy-metal-atpase-1                                                                       |
| AT3G26800 | chr2_10613173 | trans | -0,6±0,1   | 8,63E-09 | 0,18 |                                                                                            |
| AT1G13580 | chr1_4646940  | cis   | -0,6±0,1   | 8,69E-09 | 0,25 | LAG1-longevity-assurance-homolog-3                                                         |
| AT3G59330 | chr3_21917869 | cis   | -0,64±0,11 | 8,70E-09 | 0,17 | Eukaryotic-protein-of-unknown-function-(DUF914)                                            |
| AT2G35160 | chr2_14822819 | cis   | -0,59±0,1  | 8,70E-09 | 0,29 | SU(VAR)3-9-homolog-5                                                                       |

|           |               |       |            |          |      |                                                                             |
|-----------|---------------|-------|------------|----------|------|-----------------------------------------------------------------------------|
| AT4G31877 | chr4_15415403 | cis   | -0,53±0,09 | 8,74E-09 | 0,32 | MIR156C;-miRNA                                                              |
| AT1G23900 | chr1_8442838  | cis   | 0,52±0,09  | 8,84E-09 | 0,57 | gamma-adaptin-1                                                             |
| AT5G38780 | chr5_15550869 | cis   | 0,57±0,1   | 8,93E-09 | 0,25 | S-adenosyl-L-methionine-dependent-methyltransferases-superfamily-protein    |
| AT5G45460 | chr5_18423609 | cis   | 0,77±0,13  | 8,94E-09 | 0,11 |                                                                             |
| AT1G25145 | chr1_8842441  | cis   | 0,77±0,13  | 9,01E-09 | 0,12 | UDP-3-O-acyl-N-acetylglucosamine-deacetylase-family-protein                 |
| AT1G55890 | chr1_20897112 | cis   | 0,53±0,09  | 9,02E-09 | 0,45 | Tetratricopeptide-repeat-(TPR)-like-superfamily-protein                     |
| AT5G58130 | chr5_23506858 | cis   | -0,68±0,12 | 9,05E-09 | 0,16 | RNA-binding-(RRM/RBD/RNP-motifs)-family-protein                             |
| AT3G03520 | chr3_840539   | cis   | 0,6±0,1    | 9,07E-09 | 0,30 | non-specific-phospholipase-C3                                               |
| AT2G29300 | chr2_12586091 | cis   | -0,83±0,14 | 9,08E-09 | 0,09 | NAD(P)-binding-Rossmann-fold-superfamily-protein                            |
| AT5G66130 | chr5_26430031 | cis   | 0,72±0,13  | 9,10E-09 | 0,14 | RADIATION-SENSITIVE-17                                                      |
| AT4G22470 | chr4_11846652 | cis   | -0,52±0,09 | 9,12E-09 | 0,28 | protease-inhibitor/seed-storage/lipid-transfer-protein-(LTP)-family-protein |
| AT2G26220 | chr2_11169276 | cis   | 0,57±0,1   | 9,13E-09 | 0,31 |                                                                             |
| AT5G42470 | chr5_16978784 | cis   | 0,59±0,1   | 9,16E-09 | 0,22 |                                                                             |
| AT3G03560 | chr3_872072   | cis   | -0,49±0,09 | 9,26E-09 | 0,37 |                                                                             |
| AT2G33600 | chr2_14226753 | cis   | -0,97±0,17 | 9,28E-09 | 0,07 | NAD(P)-binding-Rossmann-fold-superfamily-protein                            |
| AT1G16160 | chr1_5538867  | cis   | 0,61±0,11  | 9,29E-09 | 0,20 | wall-associated-kinase-like-5                                               |
| AT4G02405 | chr4_1059368  | cis   | -0,85±0,15 | 9,35E-09 | 0,09 | S-adenosyl-L-methionine-dependent-methyltransferases-superfamily-protein    |
| AT2G30460 | chr2_12978858 | cis   | -0,57±0,1  | 9,36E-09 | 0,34 | Nucleotide/sugar-transporter-family-protein                                 |
| AT1G73670 | chr1_27699959 | cis   | -0,94±0,16 | 9,44E-09 | 0,07 | MAP-kinase-15                                                               |
| AT1G09500 | chr1_3067045  | cis   | -0,79±0,14 | 9,44E-09 | 0,12 | NAD(P)-binding-Rossmann-fold-superfamily-protein                            |
| AT2G24190 | chr2_10283196 | cis   | -0,48±0,08 | 9,47E-09 | 0,50 | NAD(P)-binding-Rossmann-fold-superfamily-protein                            |
| AT5G23980 | chr5_8104296  | cis   | 0,77±0,13  | 9,50E-09 | 0,12 | ferric-reduction-oxidase-4                                                  |
| AT5G01450 | chr1_22594423 | trans | 0,62±0,11  | 9,55E-09 | 0,19 | RING/U-box-superfamily-protein                                              |
| AT1G26440 | chr1_9148650  | cis   | -0,53±0,09 | 9,62E-09 | 0,31 | ureide-permease-5                                                           |
| AT5G05430 | chr5_1594615  | cis   | -0,54±0,09 | 9,64E-09 | 0,33 | RNA-binding-protein                                                         |
| AT3G50420 | chr3_18713181 | cis   | 0,53±0,09  | 9,67E-09 | 0,39 | Pentatricopeptide-repeat-(PPR)-superfamily-protein                          |
| AT1G72920 | chr1_27444328 | cis   | 0,49±0,09  | 9,83E-09 | 0,44 | Toll-Interleukin-Resistance-(TIR)-domain-family-protein                     |
| AT1G53320 | chr1_19889747 | cis   | -0,75±0,13 | 9,84E-09 | 0,12 | tubby-like-protein-7                                                        |
| AT5G67540 | chr5_26919119 | cis   | 0,75±0,13  | 9,87E-09 | 0,12 | Arabinanase/levansucrase/invertase                                          |
| AT1G16900 | chr1_5780205  | cis   | 0,95±0,17  | 9,99E-09 | 0,10 | Alg9-like-mannosyltransferase-family                                        |
| AT1G73490 | chr1_27639200 | cis   | -0,88±0,15 | 1,00E-08 | 0,09 | RNA-binding-(RRM/RBD/RNP-motifs)-family-protein                             |
| AT1G11880 | chr1_4009452  | cis   | -0,56±0,1  | 1,00E-08 | 0,27 | transferases,-transferring-hexosyl-groups                                   |
| AT1G25098 | chr1_8842441  | cis   | 0,81±0,14  | 1,00E-08 | 0,12 | other-RNA                                                                   |
| AT3G16390 | chr3_5583592  | cis   | 0,94±0,16  | 1,01E-08 | 0,08 | nitrile-specifier-protein-3                                                 |

|           |               |       |            |          |      |                                                                                                  |
|-----------|---------------|-------|------------|----------|------|--------------------------------------------------------------------------------------------------|
| AT1G12600 | chr1_4273340  | cis   | 0,85±0,15  | 1,02E-08 | 0,10 | UDP-N-acetylglucosamine-(UAA)-transporter-family                                                 |
| AT5G15520 | chr5_5034307  | cis   | 0,54±0,09  | 1,02E-08 | 0,40 | Ribosomal-protein-S19e-family-protein                                                            |
| AT5G24330 | chr3_9639176  | trans | 0,66±0,12  | 1,02E-08 | 0,15 | ARABIDOPSIS-TRITHORAX-RELATED-PROTEIN-6                                                          |
| AT1G65420 | chr1_23055533 | trans | -0,77±0,13 | 1,03E-08 | 0,11 | Protein-of-unknown-function-(DUF565)                                                             |
| AT5G06060 | chr5_1817325  | cis   | -0,83±0,14 | 1,03E-08 | 0,10 | NAD(P)-binding-Rossmann-fold-superfamily-protein                                                 |
| AT1G68110 | chr1_25525707 | cis   | -0,56±0,1  | 1,06E-08 | 0,20 | ENTH/ANTH/VHS-superfamily-protein                                                                |
| AT3G18530 | chr3_6375145  | cis   | 0,67±0,12  | 1,07E-08 | 0,17 | ARM-repeat-superfamily-protein                                                                   |
| AT3G55530 | chr3_20593930 | cis   | 0,79±0,14  | 1,08E-08 | 0,11 | RING/U-box-superfamily-protein                                                                   |
| AT4G11460 | chr4_6964866  | cis   | 0,53±0,09  | 1,08E-08 | 0,31 | cysteine-rich-RLK-(RECEPTOR-like-protein-kinase)-30                                              |
| AT1G63120 | chr1_18905855 | trans | 0,87±0,15  | 1,08E-08 | 0,09 | RHOMBOID-like-2                                                                                  |
| AT5G11540 | chr3_3555309  | trans | -0,65±0,11 | 1,09E-08 | 0,15 | D-arabinono-1,4-lactone-oxidase-family-protein                                                   |
| AT1G17270 | chr1_5905175  | cis   | 0,84±0,15  | 1,10E-08 | 0,09 | O-fucosyltransferase-family-protein                                                              |
| AT5G66480 | chr5_26547716 | cis   | -0,88±0,15 | 1,10E-08 | 0,08 |                                                                                                  |
| AT5G13970 | chr5_4489231  | cis   | 0,93±0,16  | 1,13E-08 | 0,08 |                                                                                                  |
| AT3G46060 | chr3_16918799 | cis   | -0,5±0,09  | 1,13E-08 | 0,44 | RAB-GTPase-homolog-8A                                                                            |
| AT4G03440 | chr4_1514386  | cis   | -0,58±0,1  | 1,13E-08 | 0,28 | Ankyrin-repeat-family-protein                                                                    |
| AT5G27010 | chr5_9500086  | cis   | 0,58±0,1   | 1,14E-08 | 0,29 | ARM-repeat-superfamily-protein                                                                   |
| AT3G49220 | chr5_13313436 | trans | 0,6±0,11   | 1,15E-08 | 0,21 | Plant-invertase/pectin-methylesterase-inhibitor-superfamily                                      |
| AT1G17860 | chr1_6140944  | cis   | 0,57±0,1   | 1,16E-08 | 0,28 | Kunitz-family-trypsin-and-protease-inhibitor-protein                                             |
| AT4G34660 | chr4_16551820 | cis   | -0,61±0,11 | 1,16E-08 | 0,35 | SH3-domain-containing-protein                                                                    |
| AT3G20310 | chr3_7087448  | cis   | -0,56±0,1  | 1,17E-08 | 0,26 | ethylene-response-factor-7                                                                       |
| AT3G25020 | chr3_9119626  | cis   | -0,54±0,09 | 1,18E-08 | 0,61 | receptor-like-protein-42                                                                         |
| AT3G62860 | chr3_23240879 | cis   | 0,62±0,11  | 1,19E-08 | 0,22 | alpha/beta-Hydrolases-superfamily-protein                                                        |
| AT3G57200 | chr3_21169754 | cis   | -0,94±0,17 | 1,19E-08 | 0,07 |                                                                                                  |
| AT1G20160 | chr1_6993390  | cis   | -0,63±0,11 | 1,19E-08 | 0,19 | Subtilisin-like-serine-endopeptidase-family-protein                                              |
| AT2G47500 | chr2_19475452 | cis   | 0,88±0,15  | 1,19E-08 | 0,09 | P-loop-nucleoside-triphosphate-hydrolases-superfamily-protein-with-CH-(Calponin-Homology)-domain |
| AT1G24265 | chr1_8600456  | cis   | 0,52±0,09  | 1,20E-08 | 0,32 | Protein-of-unknown-function-(DUF1664)                                                            |
| AT5G23330 | chr5_7855094  | cis   | -0,62±0,11 | 1,21E-08 | 0,24 | Nucleotidyl-transferase-superfamily-protein                                                      |
| AT5G19750 | chr5_6673627  | cis   | 0,77±0,14  | 1,22E-08 | 0,12 | Peroxisomal-membrane-22-kDa-(Mpv17/PMP22)-family-protein                                         |
| AT1G10990 | chr1_3633414  | cis   | -0,94±0,17 | 1,22E-08 | 0,07 |                                                                                                  |
| AT5G05350 | chr5_1585297  | cis   | 0,5±0,09   | 1,22E-08 | 0,48 | PLAC8-family-protein                                                                             |
| AT1G78450 | chr1_29513534 | cis   | -0,58±0,1  | 1,23E-08 | 0,24 | SOUL-heme-binding-family-protein                                                                 |
| AT2G39750 | chr3_10273905 | trans | -0,64±0,11 | 1,23E-08 | 0,17 | S-adenosyl-L-methionine-dependent-methyltransferases-superfamily-protein                         |
| AT1G71040 | chr1_26800400 | cis   | -0,53±0,09 | 1,23E-08 | 0,30 | Cupredoxin-superfamily-protein                                                                   |

|           |               |       |            |          |      |                                                                          |
|-----------|---------------|-------|------------|----------|------|--------------------------------------------------------------------------|
| AT3G25220 | chr3_9183287  | cis   | -0,61±0,11 | 1,24E-08 | 0,20 | FK506-binding-protein-15-kD-1                                            |
| AT4G37925 | chr4_17830243 | cis   | 0,62±0,11  | 1,24E-08 | 0,24 | subunit-NDH-M-of-NAD(P)H:plastoquinone-dehydrogenase-complex             |
| AT1G52700 | chr1_19608287 | cis   | 0,77±0,14  | 1,25E-08 | 0,11 | alpha/beta-Hydrolases-superfamily-protein                                |
| AT3G24300 | chr3_873521   | trans | 0,54±0,1   | 1,26E-08 | 0,26 | ammonium-transporter-1;3                                                 |
| AT2G38430 | chr2_16094147 | cis   | -0,58±0,1  | 1,27E-08 | 0,28 |                                                                          |
| AT2G33240 | chr2_14097649 | cis   | -0,58±0,1  | 1,28E-08 | 0,23 | myosin-XI-D                                                              |
| AT3G32920 | chr2_3105959  | trans | 0,82±0,14  | 1,28E-08 | 0,11 | P-loop-containing-nucleoside-triphosphate-hydrolases-superfamily-protein |
| AT3G16710 | chr3_5690265  | cis   | -0,61±0,11 | 1,28E-08 | 0,21 | Pentatricopeptide-repeat-(PPR)-superfamily-protein                       |
| AT4G33360 | chr4_16069056 | cis   | -0,79±0,14 | 1,29E-08 | 0,13 | NAD(P)-binding-Rossmann-fold-superfamily-protein                         |
| AT5G20810 | chr5_7044231  | cis   | -0,75±0,13 | 1,29E-08 | 0,14 | SAUR-like-auxin-responsive-protein-family-                               |
| AT1G47578 | chr1_17484722 | cis   | 0,6±0,11   | 1,30E-08 | 0,21 | Biotin/lipoate-A/B-protein-ligase-family                                 |
| AT2G39850 | chr2_16630326 | cis   | -0,75±0,13 | 1,30E-08 | 0,14 | Subtilisin-like-serine-endopeptidase-family-protein                      |
| AT4G26570 | chr4_13404089 | cis   | -0,69±0,12 | 1,30E-08 | 0,14 | calcineurin-B-like-3                                                     |
| AT3G27470 | chr3_10163601 | cis   | -0,55±0,1  | 1,31E-08 | 0,29 | Protein-of-unknown-function-(DUF707)                                     |
| AT5G41150 | chr5_16469400 | cis   | -0,6±0,1   | 1,32E-08 | 0,25 | Restriction-endonuclease,-type-II-like-superfamily-protein               |
| AT2G03710 | chr2_1127824  | cis   | 0,82±0,14  | 1,32E-08 | 0,11 | K-box-region-and-MADS-box-transcription-factor-family-protein-           |
| AT1G72190 | chr1_27168598 | cis   | -0,65±0,11 | 1,33E-08 | 0,16 | D-isomer-specific-2-hydroxyacid-dehydrogenase-family-protein             |
| AT5G47800 | chr5_19354265 | cis   | -0,48±0,08 | 1,33E-08 | 0,41 | Phototropic-responsive-NPH3-family-protein                               |
| AT2G39890 | chr2_16652965 | cis   | 0,73±0,13  | 1,34E-08 | 0,19 | proline-transporter-1                                                    |
| AT1G09920 | chr1_3215190  | cis   | 0,57±0,1   | 1,35E-08 | 0,29 | TRAF-type-zinc-finger-related                                            |
| AT1G10330 | chr1_3393212  | cis   | 0,83±0,15  | 1,35E-08 | 0,10 | Tetratricopeptide-repeat-(TPR)-like-superfamily-protein                  |
| AT4G14548 | chr4_8348045  | cis   | -0,92±0,16 | 1,35E-08 | 0,06 | other-RNA                                                                |
| AT1G54040 | chr1_20170832 | cis   | -0,73±0,13 | 1,37E-08 | 0,16 | epithiospecifier-protein                                                 |
| AT1G50575 | chr1_18726991 | cis   | 0,62±0,11  | 1,37E-08 | 0,17 | Putative-lysine-decarboxylase-family-protein                             |
| AT2G24440 | chr2_10391465 | cis   | 0,54±0,09  | 1,37E-08 | 0,34 | selenium-binding                                                         |
| AT3G13640 | chr3_4461578  | cis   | 0,78±0,14  | 1,37E-08 | 0,11 | RNAse-I-inhibitor-protein-1                                              |
| AT4G01200 | chr4_506690   | cis   | 0,54±0,1   | 1,38E-08 | 0,54 | Calcium-dependent-lipid-binding-(CaLB-domain)-family-protein             |
| AT1G15210 | chr1_5234896  | cis   | -0,72±0,13 | 1,38E-08 | 0,14 | pleiotropic-drug-resistance-7                                            |
| AT3G20420 | chr3_7119760  | cis   | 0,57±0,1   | 1,39E-08 | 0,23 | RNAse-THREE-like-protein-2                                               |
| AT1G60630 | chr1_22341230 | cis   | 0,49±0,09  | 1,40E-08 | 0,41 | Leucine-rich-repeat-protein-kinase-family-protein                        |
| AT4G05130 | chr4_2639087  | cis   | -0,81±0,14 | 1,40E-08 | 0,10 | equilibrative-nucleoside-transporter-4                                   |
| AT1G07020 | chr1_16973461 | trans | -0,64±0,11 | 1,40E-08 | 0,19 |                                                                          |
| AT1G60740 | chr1_24560818 | trans | 0,51±0,09  | 1,41E-08 | 0,37 | Thioredoxin-superfamily-protein                                          |
| AT5G15920 | chr4_6804353  | trans | -0,54±0,1  | 1,41E-08 | 0,34 | structural-maintenance-of-chromosomes-5                                  |

|           |               |       |            |          |      |                                                                        |
|-----------|---------------|-------|------------|----------|------|------------------------------------------------------------------------|
| AT4G23140 | chr4_12114095 | cis   | -0,57±0,1  | 1,41E-08 | 0,24 | cysteine-rich-RLK-(RECEPTOR-like-protein-kinase)-6                     |
| AT5G42530 | chr1_26288716 | trans | 0,56±0,1   | 1,42E-08 | 0,24 |                                                                        |
| AT4G12110 | chr4_7254085  | cis   | -0,73±0,13 | 1,42E-08 | 0,12 | sterol-4alpha-methyl-oxidase-1-1                                       |
| AT3G50810 | chr3_18890045 | cis   | 0,56±0,1   | 1,42E-08 | 0,29 | Uncharacterised-protein-family-(UPF0497)                               |
| AT1G04250 | chr1_1134230  | cis   | 0,54±0,09  | 1,43E-08 | 0,30 | AUX/IAA-transcriptional-regulator-family-protein                       |
| AT4G17710 | chr4_9859327  | cis   | -0,66±0,12 | 1,43E-08 | 0,15 | homeodomain-GLABROUS-4                                                 |
| AT5G15510 | chr5_5032483  | cis   | 0,51±0,09  | 1,43E-08 | 0,36 | TPX2-(targeting-protein-for-Xk1p2)-protein-family                      |
| AT2G28570 | chr5_10076415 | trans | -0,48±0,08 | 1,45E-08 | 0,61 |                                                                        |
| AT2G21070 | chr2_9049079  | cis   | 0,52±0,09  | 1,45E-08 | 0,56 | methyltransferases                                                     |
| AT4G38800 | chr4_18114982 | cis   | -0,7±0,12  | 1,47E-08 | 0,14 | methylthioadenosine-nucleosidase-1                                     |
| AT2G17250 | chr2_7502298  | cis   | -0,63±0,11 | 1,47E-08 | 0,20 | CCAAT-binding-factor                                                   |
| AT5G49880 | chr5_20283201 | cis   | -0,52±0,09 | 1,48E-08 | 0,43 | mitotic-checkpoint-family-protein                                      |
| AT4G27060 | chr5_15241492 | trans | 0,66±0,12  | 1,49E-08 | 0,19 | ARM-repeat-superfamily-protein                                         |
| AT1G03687 | chr1_911035   | cis   | 0,73±0,13  | 1,49E-08 | 0,14 | DTW-domain-containing-protein                                          |
| AT3G12500 | chr3_3961589  | cis   | 0,73±0,13  | 1,49E-08 | 0,14 | basic-chitinase                                                        |
| AT2G27340 | chr2_11749813 | trans | 0,55±0,1   | 1,49E-08 | 0,40 | N-acetylglucosaminylphosphatidylinositol-de-N-acetylase-family-protein |
| AT1G35710 | chr1_13217203 | cis   | -0,49±0,09 | 1,50E-08 | 0,41 | Protein-kinase-family-protein-with-leucine-rich-repeat-domain          |
| AT5G56990 | chr5_23061966 | cis   | 0,86±0,15  | 1,51E-08 | 0,09 |                                                                        |
| AT2G26355 | chr2_11211668 | cis   | 0,54±0,1   | 1,51E-08 | 0,41 | other-RNA                                                              |
| AT3G01920 | chr1_11108688 | trans | -0,74±0,13 | 1,52E-08 | 0,11 | DHBP-synthase-RibB-like-alpha/beta-domain                              |
| AT3G11440 | chr3_3602192  | cis   | -0,51±0,09 | 1,52E-08 | 0,44 | myb-domain-protein-65                                                  |
| AT5G63520 | chr5_25423865 | cis   | -0,96±0,17 | 1,52E-08 | 0,07 |                                                                        |
| AT3G01320 | chr3_106640   | cis   | -0,55±0,1  | 1,52E-08 | 0,28 | SIN3-like-1                                                            |
| AT1G25155 | chr1_8838392  | cis   | -0,48±0,09 | 1,53E-08 | 0,49 | Glutamine-amidotransferase-type-1-family-protein                       |
| AT4G27080 | chr5_15243254 | trans | 0,67±0,12  | 1,54E-08 | 0,19 | PDI-like-5-4                                                           |
| AT3G30885 | chr3_12656772 | cis   | -0,79±0,14 | 1,54E-08 | 0,10 |                                                                        |
| AT5G46720 | chr5_18959636 | cis   | -0,56±0,1  | 1,56E-08 | 0,31 | AIG2-like-(avirulence-induced-gene)-family-protein                     |
| AT4G29890 | chr4_14536920 | trans | -0,69±0,12 | 1,57E-08 | 0,16 | choline-monooxygenase,-putative-(CMO-like)                             |
| AT1G79950 | chr1_30058921 | cis   | -0,67±0,12 | 1,59E-08 | 0,16 | RAD3-like-DNA-binding-helicase-protein                                 |
| AT1G63460 | chr1_23539579 | cis   | -0,68±0,12 | 1,59E-08 | 0,16 | glutathione-peroxidase-8                                               |
| AT4G14580 | chr4_8369338  | cis   | -0,91±0,16 | 1,60E-08 | 0,08 | CBL-interacting-protein-kinase-4                                       |
| AT5G44080 | chr5_17739427 | cis   | 0,52±0,09  | 1,60E-08 | 0,39 | Basic-leucine-zipper-(bZIP)-transcription-factor-family-protein        |
| AT5G58600 | chr5_23680788 | cis   | -0,61±0,11 | 1,60E-08 | 0,23 | Plant-protein-of-unknown-function-(DUF828)                             |
| AT2G19240 | chr2_8349464  | cis   | 0,56±0,1   | 1,61E-08 | 0,26 | Ypt/Rab-GAP-domain-of-gyp1p-superfamily-protein                        |

|           |               |       |            |          |      |                                                                                                  |
|-----------|---------------|-------|------------|----------|------|--------------------------------------------------------------------------------------------------|
| AT3G53650 | chr3_19885798 | cis   | -0,77±0,14 | 1,61E-08 | 0,09 | Histone-superfamily-protein                                                                      |
| AT2G30270 | chr2_12905734 | cis   | 0,5±0,09   | 1,63E-08 | 0,53 | Protein-of-unknown-function-(DUF567)                                                             |
| AT4G00975 | chr5_7918293  | trans | 0,84±0,15  | 1,63E-08 | 0,09 | other-RNA                                                                                        |
| AT1G55420 | chr1_20693672 | cis   | 0,96±0,17  | 1,63E-08 | 0,06 | Cysteine/Histidine-rich-C1-domain-family-protein                                                 |
| AT5G16540 | chr5_5405112  | cis   | 0,56±0,1   | 1,65E-08 | 0,25 | zinc-finger-nuclease-3                                                                           |
| AT5G21030 | chr5_7140817  | cis   | 0,5±0,09   | 1,65E-08 | 0,50 | PAZ-domain-containing-protein-/piwi-domain-containing-protein                                    |
| AT1G66590 | chr1_26235271 | trans | -0,5±0,09  | 1,66E-08 | 0,46 | cytochrome-c-oxidase-19-1                                                                        |
| AT1G72950 | chr1_27441129 | cis   | 0,7±0,12   | 1,68E-08 | 0,14 | Disease-resistance-protein-(TIR-NBS-class)                                                       |
| AT5G25770 | chr5_8970186  | cis   | -0,93±0,16 | 1,68E-08 | 0,07 | alpha/beta-Hydrolases-superfamily-protein                                                        |
| AT2G18410 | chr3_15611343 | trans | -0,52±0,09 | 1,69E-08 | 0,31 |                                                                                                  |
| AT4G14147 | chr5_17997128 | trans | 0,54±0,1   | 1,70E-08 | 0,24 | protein-binding                                                                                  |
| AT1G53460 | chr1_19948118 | cis   | -0,9±0,16  | 1,71E-08 | 0,09 |                                                                                                  |
| AT3G30200 | chr1_27556182 | trans | -0,63±0,11 | 1,73E-08 | 0,18 | Plant-transposase-(PttA/En/Spm-family)                                                           |
| AT3G48330 | chr3_17891002 | cis   | -0,49±0,09 | 1,74E-08 | 0,46 | protein-l-isoaspartate-methyltransferase-1                                                       |
| AT5G47440 | chr5_19237562 | cis   | 0,77±0,14  | 1,75E-08 | 0,12 | Plant-protein-of-unknown-function-(DUF828)-with-plant-pleckstrin-homology-like-region            |
| AT3G54280 | chr2_5407788  | trans | 0,52±0,09  | 1,75E-08 | 0,39 | DNA-binding;ATP-binding;nucleic-acid-binding;binding;helicases;ATP-binding;DNA-binding;helicases |
| AT5G10800 | chr5_3410379  | cis   | -0,67±0,12 | 1,77E-08 | 0,15 | RNA-recognition-motif-(RRM)-containing-protein                                                   |
| AT3G59710 | chr3_22059222 | cis   | -0,57±0,1  | 1,77E-08 | 0,26 | NAD(P)-binding-Rossmann-fold-superfamily-protein                                                 |
| AT4G00230 | chr4_97499    | cis   | -0,67±0,12 | 1,78E-08 | 0,16 | xylem-serine-peptidase-1                                                                         |
| AT2G35738 | chr2_15023025 | cis   | 0,57±0,1   | 1,79E-08 | 0,21 | other-RNA                                                                                        |
| AT4G02460 | chr5_14985436 | trans | -0,46±0,08 | 1,80E-08 | 0,46 | DNA-mismatch-repair-protein,-putative                                                            |
| AT2G42810 | chr3_7511056  | trans | 0,61±0,11  | 1,80E-08 | 0,18 | protein-phosphatase-5.2                                                                          |
| AT5G22545 | chr5_7483918  | cis   | -0,65±0,12 | 1,81E-08 | 0,19 |                                                                                                  |
| AT2G14090 | chr2_5925301  | cis   | -0,56±0,1  | 1,82E-08 | 0,26 |                                                                                                  |
| AT5G55130 | chr5_22441845 | NA    | 0,91±0,16  | 1,82E-08 | 0,09 | co-factor-for-nitrate,-reductase-and-xanthine-dehydrogenase-5                                    |
| AT5G03830 | chr5_1017018  | cis   | 0,51±0,09  | 1,83E-08 | 0,48 | CDK-inhibitor-P21-binding-protein                                                                |
| AT5G10080 | chr1_24538442 | trans | -0,5±0,09  | 1,83E-08 | 0,37 | Eukaryotic-aspartyl-protease-family-protein                                                      |
| AT5G03300 | chr5_796262   | cis   | 0,49±0,09  | 1,85E-08 | 0,33 | adenosine-kinase-2                                                                               |
| AT1G11860 | chr1_4006487  | cis   | 0,52±0,09  | 1,86E-08 | 0,32 | Glycine-cleavage-T-protein-family                                                                |
| AT1G68935 | chr1_25921536 | cis   | -0,85±0,15 | 1,87E-08 | 0,09 |                                                                                                  |
| AT3G13438 | chr3_4378113  | cis   | -0,93±0,17 | 1,88E-08 | 0,11 | transposable-element-gene                                                                        |
| AT1G03300 | chr1_807780   | cis   | -0,67±0,12 | 1,89E-08 | 0,19 | DOMAIN-OF-UNKNOWN-FUNCTION-724-1                                                                 |
| AT5G09960 | chr5_3101648  | cis   | 0,58±0,1   | 1,89E-08 | 0,24 |                                                                                                  |
| AT5G52820 | chr5_21396010 | cis   | 0,58±0,1   | 1,92E-08 | 0,24 | WD-40-repeat-family-protein-/notchless-protein,-putative                                         |

|           |               |       |            |          |      |                                                                          |
|-----------|---------------|-------|------------|----------|------|--------------------------------------------------------------------------|
| AT2G31940 | chr2_13582422 | cis   | -0,67±0,12 | 1,92E-08 | 0,20 |                                                                          |
| AT3G19440 | chr3_6742417  | cis   | -0,5±0,09  | 1,93E-08 | 0,35 | Pseudouridine-synthase-family-protein                                    |
| AT5G23520 | chr5_7931777  | cis   | 0,57±0,1   | 1,93E-08 | 0,39 | smr-(Small-MutS-Related)-domain-containing-protein                       |
| AT1G70505 | chr1_26569272 | cis   | 0,56±0,1   | 1,94E-08 | 0,26 |                                                                          |
| AT1G75990 | chr1_28524806 | cis   | -0,52±0,09 | 1,94E-08 | 0,34 | PAM-domain-(PCI/PINT-associated-module)-protein                          |
| AT1G49245 | chr1_18219075 | cis   | -0,68±0,12 | 1,95E-08 | 0,19 | Prefoldin-chaperone-subunit-family-protein                               |
| AT2G28670 | chr2_12301537 | cis   | 0,48±0,09  | 1,96E-08 | 0,41 | Disease-resistance-responsive-(dirigent-like-protein)-family-protein     |
| AT1G09010 | chr1_2899517  | cis   | 0,53±0,09  | 1,97E-08 | 0,31 | glycoside-hydrolase-family-2-protein                                     |
| AT3G04000 | chr3_1036834  | cis   | 0,52±0,09  | 1,97E-08 | 0,30 | NAD(P)-binding-Rossmann-fold-superfamily-protein                         |
| AT2G37150 | chr1_27132704 | trans | 0,47±0,08  | 1,99E-08 | 0,44 | RING/U-box-superfamily-protein                                           |
| AT1G24909 | chr1_8838392  | trans | -0,48±0,09 | 1,99E-08 | 0,49 | Glutamine-amidotransferase-type-1-family-protein                         |
| AT3G51820 | chr3_19215689 | cis   | 0,67±0,12  | 2,00E-08 | 0,19 | UbiA-prenyltransferase-family-protein                                    |
| AT4G36880 | chr4_17377498 | cis   | 0,56±0,1   | 2,01E-08 | 0,25 | cysteine-proteinase1                                                     |
| AT3G29250 | chr5_20942173 | trans | 0,6±0,11   | 2,01E-08 | 0,20 | NAD(P)-binding-Rossmann-fold-superfamily-protein                         |
| AT3G28290 | chr3_10561937 | cis   | 0,79±0,14  | 2,02E-08 | 0,11 | Protein-of-unknown-function-(DUF677)                                     |
| AT1G07790 | chr1_2389507  | cis   | 0,75±0,13  | 2,03E-08 | 0,15 | Histone-superfamily-protein                                              |
| AT2G38610 | chr2_16137736 | cis   | -0,47±0,08 | 2,03E-08 | 0,45 | RNA-binding-KH-domain-containing-protein                                 |
| AT2G45560 | chr2_18778754 | cis   | -0,52±0,09 | 2,04E-08 | 0,40 | cytochrome-P450,-family-76,-subfamily-C,-polypeptide-1                   |
| AT3G07500 | chr3_2395955  | cis   | 0,48±0,09  | 2,04E-08 | 0,49 | Far-red-impaired-responsive-(FAR1)-family-protein                        |
| AT3G27120 | chr3_10008757 | cis   | 01,02±0,18 | 2,06E-08 | 0,06 | P-loop-containing-nucleoside-triphosphate-hydrolases-superfamily-protein |
| AT2G44670 | chr4_7756752  | trans | 0,44±0,08  | 2,06E-08 | 0,50 | Protein-of-unknown-function-(DUF581)                                     |
| AT5G02170 | chr5_428888   | cis   | -0,63±0,11 | 2,07E-08 | 0,19 | Transmembrane-amino-acid-transporter-family-protein                      |
| AT1G53340 | chr1_19897175 | cis   | 0,5±0,09   | 2,07E-08 | 0,44 | Cysteine/Histidine-rich-C1-domain-family-protein                         |
| AT2G35060 | chr2_14753584 | cis   | 0,5±0,09   | 2,08E-08 | 0,44 | K <sup>+</sup> -uptake-permease-11                                       |
| AT5G10010 | chr5_3128050  | cis   | -0,56±0,1  | 2,09E-08 | 0,29 |                                                                          |
| AT2G30140 | chr2_12891166 | cis   | 0,59±0,11  | 2,09E-08 | 0,23 | UDP-Glycosyltransferase-superfamily-protein                              |
| AT1G60610 | chr1_22329998 | cis   | -0,51±0,09 | 2,09E-08 | 0,31 | SBP-(S-ribonuclease-binding-protein)-family-protein                      |
| AT5G10510 | chr5_3319849  | cis   | 0,58±0,1   | 2,10E-08 | 0,29 | AINTEGUMENTA-like-6                                                      |
| AT5G01340 | chr5_190469   | cis   | 0,71±0,13  | 2,11E-08 | 0,16 | Mitochondrial-substrate-carrier-family-protein                           |
| AT1G20620 | chr1_7124385  | cis   | 0,72±0,13  | 2,11E-08 | 0,12 | catalase-3                                                               |
| AT3G10730 | chr3_3361393  | cis   | 0,61±0,11  | 2,14E-08 | 0,21 | SAD1/UNC-84-domain-protein-2                                             |
| AT1G79520 | chr1_29915150 | cis   | 0,49±0,09  | 2,14E-08 | 0,44 | Cation-efflux-family-protein                                             |
| AT1G02770 | chr1_607355   | cis   | 0,53±0,09  | 2,15E-08 | 0,32 | Protein-of-unknown-function-(DUF626)                                     |
| AT5G63970 | chr3_7011617  | trans | 0,54±0,1   | 2,16E-08 | 0,25 | Copine-(Calcium-dependent-phospholipid-binding-protein)-family           |

|           |               |       |             |          |      |                                                                         |
|-----------|---------------|-------|-------------|----------|------|-------------------------------------------------------------------------|
| AT4G31790 | chr4_15373256 | cis   | -0,63±0,11  | 2,17E-08 | 0,19 | Tetrapyrrole-(Corrin/Porphyrin)-Methylases                              |
| AT3G07080 | chr3_2238593  | cis   | -0,67±0,12  | 2,17E-08 | 0,15 | EamA-like-transporter-family                                            |
| AT5G40080 | chr5_15935609 | trans | 0,49±0,09   | 2,17E-08 | 0,36 | Mitochondrial-ribosomal-protein-L27                                     |
| AT5G10810 | chr5_3415555  | cis   | -0,58±0,1   | 2,20E-08 | 0,22 | enhancer-of-rudimentary-protein,-putative                               |
| AT3G53890 | chr3_19955946 | cis   | -0,58±0,1   | 2,20E-08 | 0,23 | Ribosomal-protein-S21e-                                                 |
| AT5G32440 | chr5_11618157 | trans | 0,53±0,09   | 2,20E-08 | 0,41 | Ubiquitin-system-component-Cue-protein                                  |
| AT4G36150 | chr4_12112307 | trans | 0,59±0,11   | 2,21E-08 | 0,21 | Disease-resistance-protein-(TIR-NBS-LRR-class)-family                   |
| AT2G16400 | chr2_7103052  | cis   | -0,65±0,12  | 2,23E-08 | 0,24 | BEL1-like-homeodomain-7                                                 |
| AT5G08360 | chr5_2688664  | cis   | -01,01±0,18 | 2,24E-08 | 0,06 | Protein-of-unknown-function-(DUF789)                                    |
| AT3G26430 | chr3_9675361  | cis   | 0,52±0,09   | 2,25E-08 | 0,37 | GDSL-like-Lipase/Acylhydrolase-superfamily-protein                      |
| AT2G41830 | chr3_7410921  | trans | -0,63±0,11  | 2,25E-08 | 0,17 | Uncharacterized-protein                                                 |
| AT1G69400 | chr1_26087154 | cis   | -0,7±0,13   | 2,26E-08 | 0,13 | Transducin/WD40-repeat-like-superfamily-protein                         |
| AT5G26220 | chr5_9162525  | cis   | -0,74±0,13  | 2,27E-08 | 0,14 | ChaC-like-family-protein                                                |
| AT5G51590 | chr2_17487927 | trans | 0,68±0,12   | 2,27E-08 | 0,14 | AT-hook-motif-DNA-binding-family-protein                                |
| AT1G07780 | chr1_2411504  | cis   | 0,62±0,11   | 2,27E-08 | 0,20 | phosphoribosylanthranilate-isomerase-1                                  |
| AT5G43780 | chr5_17592204 | cis   | 0,49±0,09   | 2,27E-08 | 0,55 | Pseudouridine-synthase/archaeosine-transglycosylase-like-family-protein |
| AT5G39960 | chr5_15993334 | cis   | 0,61±0,11   | 2,33E-08 | 0,19 | GTP-binding;GTP-binding                                                 |
| AT5G47730 | chr5_19342075 | cis   | -0,48±0,09  | 2,33E-08 | 0,46 | Sec14p-like-phosphatidylinositol-transfer-family-protein                |
| AT3G23260 | chr3_8313341  | cis   | -0,54±0,1   | 2,33E-08 | 0,27 | F-box-and-associated-interaction-domains-containing-protein             |
| AT4G36970 | chr1_21358004 | trans | 0,62±0,11   | 2,34E-08 | 0,17 | Remorin-family-protein                                                  |
| AT1G64355 | chr1_23890668 | cis   | -0,5±0,09   | 2,34E-08 | 0,40 |                                                                         |
| AT5G26330 | chr5_9243151  | cis   | -0,52±0,09  | 2,34E-08 | 0,57 | Cupredoxin-superfamily-protein                                          |
| AT5G19151 | chr5_6424256  | cis   | -0,95±0,17  | 2,34E-08 | 0,07 |                                                                         |
| AT3G28730 | chr3_10776224 | cis   | 0,75±0,13   | 2,34E-08 | 0,11 | high-mobility-group                                                     |
| AT3G02850 | chr3_627697   | cis   | -0,59±0,11  | 2,34E-08 | 0,31 | STELAR-K+-outward-rectifier                                             |
| AT1G17890 | chr1_6155204  | cis   | 0,49±0,09   | 2,35E-08 | 0,42 | NAD(P)-binding-Rossmann-fold-superfamily-protein                        |
| AT5G18640 | chr5_6212879  | cis   | -0,67±0,12  | 2,35E-08 | 0,15 | alpha/beta-Hydrolases-superfamily-protein                               |
| AT3G02515 | chr1_19317553 | trans | 0,52±0,09   | 2,35E-08 | 0,30 | transposable-element-gene                                               |
| AT4G25160 | chr4_12901908 | cis   | -0,57±0,1   | 2,35E-08 | 0,26 | U-box-domain-containing-protein-kinase-family-protein                   |
| AT5G20590 | chr5_6976013  | cis   | 0,56±0,1    | 2,36E-08 | 0,51 | TRICHOME-BIREFRINGENCE-LIKE-5                                           |
| AT4G14970 | chr4_8549663  | cis   | 0,63±0,11   | 2,37E-08 | 0,17 |                                                                         |
| AT5G10700 | chr5_3378136  | cis   | 0,52±0,09   | 2,37E-08 | 0,32 | Peptidyl-tRNA-hydrolase-II-(PTH2)-family-protein                        |
| AT1G34630 | chr1_12663560 | cis   | -0,53±0,1   | 2,38E-08 | 0,29 |                                                                         |
| AT2G02061 | chr2_497693   | cis   | -0,54±0,1   | 2,40E-08 | 0,25 | Nucleotide-diphospho-sugar-transferase-family-protein                   |



|           |               |       |            |          |      |                                                                    |
|-----------|---------------|-------|------------|----------|------|--------------------------------------------------------------------|
| AT5G08370 | chr5_2692864  | cis   | 0,99±0,18  | 2,40E-08 | 0,07 | alpha-galactosidase-2                                              |
| AT1G09410 | chr1_3029542  | cis   | -0,88±0,16 | 2,40E-08 | 0,08 | pentatricopeptide-(PPR)-repeat-containing-protein                  |
| AT3G30300 | chr3_11977788 | trans | 01,01±0,18 | 2,42E-08 | 0,06 | O-fucosyltransferase-family-protein                                |
| AT3G21750 | chr2_13921849 | trans | -0,61±0,11 | 2,43E-08 | 0,19 | UDP-glucosyl-transferase-71B1                                      |
| AT1G30860 | chr1_10989031 | cis   | 0,62±0,11  | 2,43E-08 | 0,19 | RING/U-box-superfamily-protein                                     |
| AT5G50130 | chr5_20402588 | cis   | 0,58±0,1   | 2,44E-08 | 0,24 | NAD(P)-binding-Rossmann-fold-superfamily-protein                   |
| AT1G22350 | chr1_7893594  | cis   | -0,46±0,08 | 2,45E-08 | 0,53 |                                                                    |
| AT3G09480 | chr3_2914935  | cis   | 0,58±0,1   | 2,45E-08 | 0,21 | Histone-superfamily-protein                                        |
| AT5G56190 | chr5_22741453 | cis   | 0,49±0,09  | 2,45E-08 | 0,44 | Transducin/WD40-repeat-like-superfamily-protein                    |
| AT3G03600 | chr2_19503336 | trans | 0,79±0,14  | 2,46E-08 | 0,09 | ribosomal-protein-S2                                               |
| AT2G39250 | chr2_16409973 | cis   | 0,66±0,12  | 2,47E-08 | 0,16 | Integrase-type-DNA-binding-superfamily-protein                     |
| AT1G49720 | chr1_18400592 | cis   | 0,53±0,1   | 2,48E-08 | 0,34 | abscisic-acid-responsive-element-binding-factor-1                  |
| AT3G23325 | chr3_8345695  | cis   | -0,61±0,11 | 2,48E-08 | 0,24 | Splicing-factor-3B-subunit-5/RDS3-complex-subunit-10               |
| AT5G60700 | chr5_24404922 | cis   | 0,52±0,09  | 2,49E-08 | 0,52 | glycosyltransferase-family-protein-2                               |
| AT3G06180 | chr4_2412418  | trans | -0,73±0,13 | 2,49E-08 | 0,10 | Ribosomal-protein-L34e-superfamily-protein                         |
| AT1G78476 | chr1_29524227 | cis   | -0,53±0,1  | 2,50E-08 | 0,24 |                                                                    |
| AT2G46290 | chr1_19690189 | trans | 0,89±0,16  | 2,51E-08 | 0,07 | Transducin/WD40-repeat-like-superfamily-protein                    |
| AT5G47660 | chr5_23344738 | trans | -0,74±0,13 | 2,52E-08 | 0,12 | Homeodomain-like-superfamily-protein                               |
| AT1G10230 | chr1_3396134  | cis   | -0,6±0,11  | 2,52E-08 | 0,19 | SKP1-like-18                                                       |
| AT1G31910 | chr4_9528845  | trans | -0,5±0,09  | 2,54E-08 | 0,49 | GHMP-kinase-family-protein                                         |
| AT2G45670 | chr1_16935634 | trans | -0,48±0,09 | 2,54E-08 | 0,47 | calcineurin-B-subunit-related                                      |
| AT2G27970 | chr2_11913129 | cis   | -0,5±0,09  | 2,55E-08 | 0,53 | CDK-subunit-2                                                      |
| AT1G66340 | chr1_24734188 | cis   | 0,59±0,11  | 2,59E-08 | 0,23 | Signal-transduction-histidine-kinase,-hybrid-type,-ethylene-sensor |
| AT1G01240 | chr1_100027   | cis   | 0,62±0,11  | 2,59E-08 | 0,17 |                                                                    |
| AT3G57740 | chr3_21437509 | cis   | 0,7±0,13   | 2,59E-08 | 0,14 | Protein-kinase-superfamily-protein                                 |
| AT5G10260 | chr2_2419382  | trans | 0,75±0,13  | 2,60E-08 | 0,11 | RAB-GTPase-homolog-H1E                                             |
| AT5G27630 | chr5_9766989  | cis   | 0,73±0,13  | 2,60E-08 | 0,15 | acyl-CoA-binding-protein-5                                         |
| AT5G44520 | chr5_17932027 | cis   | -0,81±0,15 | 2,60E-08 | 0,10 | NagB/RpiA/CoA-transferase-like-superfamily-protein                 |
| AT1G63770 | chr1_4473727  | trans | 0,55±0,1   | 2,62E-08 | 0,22 | Peptidase-M1-family-protein                                        |
| AT4G01320 | chr4_549506   | cis   | -0,69±0,12 | 2,62E-08 | 0,14 | Peptidase-family-M48-family-protein                                |
| AT2G05590 | chr2_2064956  | cis   | 0,53±0,1   | 2,62E-08 | 0,29 | TLD-domain-containing-nucleolar-protein                            |
| AT3G57120 | chr3_21140914 | cis   | 0,68±0,12  | 2,64E-08 | 0,16 | Protein-kinase-superfamily-protein                                 |
| AT5G10330 | chr4_11121261 | trans | 0,81±0,15  | 2,64E-08 | 0,11 | histidinol-phosphate-aminotransferase-1                            |
| AT2G31910 | chr1_21850510 | trans | 0,46±0,08  | 2,64E-08 | 0,44 | cation/H <sup>+</sup> -exchanger-21                                |

|           |               |       |            |          |      |                                                                                |
|-----------|---------------|-------|------------|----------|------|--------------------------------------------------------------------------------|
| AT2G02955 | chr2_860116   | cis   | 0,96±0,17  | 2,64E-08 | 0,06 | maternal-effect-embryo-arrest-12                                               |
| AT3G05570 | chr3_1613760  | cis   | 0,92±0,16  | 2,65E-08 | 0,07 |                                                                                |
| AT2G14285 | chr4_4788804  | trans | -0,64±0,12 | 2,66E-08 | 0,20 | Small-nuclear-ribonucleoprotein-family-protein                                 |
| AT4G10920 | chr4_6699117  | cis   | 0,55±0,1   | 2,67E-08 | 0,24 | transcriptional-coactivator-p15-(PC4)-family-protein-(KELP)                    |
| AT2G04540 | chr2_1579288  | cis   | 0,79±0,14  | 2,68E-08 | 0,11 | Beta-ketoacyl-synthase                                                         |
| AT3G57140 | chr4_11589080 | trans | -0,45±0,08 | 2,71E-08 | 0,46 | sugar-dependent-1-like                                                         |
| AT4G01575 | chr4_688298   | cis   | 0,55±0,1   | 2,71E-08 | 0,24 | serine-protease-inhibitor,-Kazal-type-family-protein                           |
| AT1G55320 | chr1_20635146 | cis   | -0,54±0,1  | 2,74E-08 | 0,32 | acyl-activating-enzyme-18                                                      |
| AT5G60370 | chr5_24281843 | cis   | 0,5±0,09   | 2,75E-08 | 0,60 |                                                                                |
| AT2G30330 | chr2_12929033 | cis   | 0,53±0,1   | 2,75E-08 | 0,32 | GCN5L1-family-protein                                                          |
| AT4G02195 | chr4_974563   | cis   | 0,95±0,17  | 2,78E-08 | 0,06 | syntaxin-of-plants-42                                                          |
| AT3G53680 | chr3_19898140 | cis   | -0,55±0,1  | 2,78E-08 | 0,34 | Acyl-CoA-N-acyltransferase-with-RING/FYVE/PHD-type-zinc-finger-domain          |
| AT1G13670 | chr3_13803064 | trans | -0,49±0,09 | 2,79E-08 | 0,66 |                                                                                |
| AT2G32840 | chr2_13923281 | cis   | -0,48±0,09 | 2,80E-08 | 0,39 | proline-rich-family-protein                                                    |
| AT1G43180 | chr1_18587810 | trans | 0,63±0,11  | 2,81E-08 | 0,16 |                                                                                |
| AT5G57345 | chr5_23227828 | cis   | 0,68±0,12  | 2,83E-08 | 0,18 |                                                                                |
| ATMG00640 | chr3_19051497 | trans | 0,5±0,09   | 2,84E-08 | 0,28 | hydrogen-ion-transporting-ATP-synthases,-rotational-mechanism;zinc-ion-binding |
| AT1G12250 | chr1_4158507  | cis   | -0,96±0,17 | 2,85E-08 | 0,06 | Pentapeptide-repeat-containing-protein                                         |
| AT4G32730 | chr4_13252657 | trans | -0,71±0,13 | 2,86E-08 | 0,13 | Homeodomain-like-protein                                                       |
| AT5G46270 | chr1_19328809 | trans | -0,53±0,09 | 2,87E-08 | 0,25 | Disease-resistance-protein-(TIR-NBS-LRR-class)-family                          |
| AT4G19840 | chr4_10774639 | cis   | 0,54±0,1   | 2,88E-08 | 0,24 | phloem-protein-2-A1                                                            |
| AT2G39130 | chr2_16328361 | cis   | -0,47±0,08 | 2,88E-08 | 0,44 | Transmembrane-amino-acid-transporter-family-protein                            |
| AT5G64050 | chr5_25633453 | cis   | -0,59±0,11 | 2,89E-08 | 0,25 | glutamate-tRNA-synthetase                                                      |
| AT2G32810 | chr2_13928359 | cis   | -0,61±0,11 | 2,92E-08 | 0,18 | beta-galactosidase-9                                                           |
| AT3G55060 | chr3_20419609 | cis   | 0,53±0,1   | 2,93E-08 | 0,29 |                                                                                |
| AT2G23100 | chr2_9839691  | cis   | -0,56±0,1  | 2,97E-08 | 0,23 | Cysteine/Histidine-rich-C1-domain-family-protein                               |
| AT3G25990 | chr3_22169625 | trans | -0,56±0,1  | 2,97E-08 | 0,23 | Homeodomain-like-superfamily-protein                                           |
| AT5G20940 | chr5_7114734  | cis   | -0,56±0,1  | 2,97E-08 | 0,27 | Glycosyl-hydrolase-family-protein                                              |
| AT3G45940 | chr3_16889397 | cis   | 0,69±0,13  | 2,98E-08 | 0,15 | Glycosyl-hydrolases-family-31--protein                                         |
| AT4G13190 | chr4_7662128  | cis   | -0,65±0,12 | 2,98E-08 | 0,14 | Protein-kinase-superfamily-protein                                             |
| AT5G55170 | chr4_616041   | trans | -0,77±0,14 | 2,98E-08 | 0,10 | small-ubiquitin-like-modifier-3                                                |
| AT1G65970 | chr1_24571257 | cis   | 0,56±0,1   | 2,99E-08 | 0,25 | thioredoxin-dependent-peroxidase-2                                             |
| AT5G53730 | chr5_21807548 | cis   | -0,69±0,12 | 3,00E-08 | 0,14 | Late-embryogenesis-abundant-(LEA)-hydroxyproline-rich-glycoprotein-family      |
| AT3G12510 | chr3_3950102  | cis   | 0,61±0,11  | 3,02E-08 | 0,23 | MADS-box-family-protein                                                        |

|           |               |       |            |          |      |                                                               |
|-----------|---------------|-------|------------|----------|------|---------------------------------------------------------------|
| AT2G01640 | chr2_288906   | cis   | 0,87±0,16  | 3,02E-08 | 0,08 |                                                               |
| AT3G23020 | chr3_8177200  | cis   | 0,53±0,1   | 3,03E-08 | 0,31 | Tetratricopeptide-repeat-(TPR)-like-superfamily-protein       |
| AT5G27610 | chr5_9764697  | cis   | -0,66±0,12 | 3,03E-08 | 0,15 | DIRP-;Myb-like-DNA-binding-domain                             |
| AT1G74680 | chr1_28063927 | cis   | 0,58±0,1   | 3,08E-08 | 0,22 | Exostosin-family-protein                                      |
| AT5G20350 | chr5_6876585  | cis   | -0,5±0,09  | 3,08E-08 | 0,35 | Ankyrin-repeat-family-protein-with-DHHC-zinc-finger-domain    |
| AT3G52420 | chr3_19429961 | cis   | -0,53±0,1  | 3,08E-08 | 0,26 | outer-envelope-membrane-protein-7                             |
| AT5G56130 | chr3_18598374 | trans | -0,6±0,11  | 3,09E-08 | 0,21 | Transducin/WD40-repeat-like-superfamily-protein               |
| AT5G12930 | chr5_4085323  | cis   | -0,67±0,12 | 3,09E-08 | 0,21 |                                                               |
| AT2G31910 | chr2_13572549 | cis   | 0,62±0,11  | 3,12E-08 | 0,16 | cation/H <sup>+</sup> -exchanger-21                           |
| AT1G30620 | chr1_10864371 | cis   | 0,53±0,1   | 3,15E-08 | 0,29 | NAD(P)-binding-Rossmann-fold-superfamily-protein              |
| AT5G33300 | chr5_12450869 | trans | 0,92±0,17  | 3,17E-08 | 0,08 | chromosome-associated-kinesin-related                         |
| AT4G09670 | chr4_6108822  | cis   | 0,54±0,1   | 3,17E-08 | 0,24 | Oxidoreductase-family-protein                                 |
| AT2G37860 | chr2_15852326 | cis   | 0,99±0,18  | 3,18E-08 | 0,06 | Protein-of-unknown-function-(DUF3411)                         |
| AT2G40240 | chr5_15481306 | trans | -0,64±0,11 | 3,18E-08 | 0,16 | Tetratricopeptide-repeat-(TPR)-like-superfamily-protein       |
| AT4G37030 | chr4_17447506 | cis   | -0,61±0,11 | 3,22E-08 | 0,19 |                                                               |
| AT1G71440 | chr1_26921006 | cis   | 0,82±0,15  | 3,24E-08 | 0,09 | tubulin-folding-cofactor-E-/-Pfifferling-(PFI)                |
| AT5G38360 | chr5_15332018 | cis   | -0,67±0,12 | 3,27E-08 | 0,16 | alpha/beta-Hydrolases-superfamily-protein                     |
| AT2G18710 | chr2_8112156  | cis   | -0,49±0,09 | 3,28E-08 | 0,47 | SECY-homolog-1                                                |
| AT1G32928 | chr1_11930336 | cis   | -0,48±0,09 | 3,28E-08 | 0,40 |                                                               |
| AT5G66360 | chr4_6690528  | trans | -0,49±0,09 | 3,29E-08 | 0,56 | Ribosomal-RNA-adenine-dimethylase-family-protein              |
| AT1G14730 | chr1_5069662  | cis   | -0,94±0,17 | 3,29E-08 | 0,06 | Cytochrome-b561/ferric-reductase-transmembrane-protein-family |
| AT3G20975 | chr3_7329829  | cis   | 0,92±0,17  | 3,29E-08 | 0,09 | transposable-element-gene                                     |
| AT5G01090 | chr1_1926622  | trans | -0,73±0,13 | 3,33E-08 | 0,11 | Concanavalin-A-like-lectin-family-protein                     |
| AT2G39570 | chr2_16507683 | cis   | -0,66±0,12 | 3,34E-08 | 0,14 | ACT-domain-containing-protein                                 |
| AT5G01810 | chr5_311371   | cis   | 0,49±0,09  | 3,35E-08 | 0,46 | CBL-interacting-protein-kinase-15                             |
| AT2G21970 | chr1_7336537  | trans | -0,73±0,13 | 3,35E-08 | 0,11 | stress-enhanced-protein-2                                     |
| AT1G54050 | chr1_20170832 | cis   | 0,78±0,14  | 3,36E-08 | 0,16 | HSP20-like-chaperones-superfamily-protein                     |
| AT5G28340 | chr4_2873038  | trans | -0,95±0,17 | 3,37E-08 | 0,06 | Tetratricopeptide-repeat-(TPR)-like-superfamily-protein       |
| AT4G03820 | chr2_9283891  | trans | -0,67±0,12 | 3,37E-08 | 0,13 | Protein-of-unknown-function-(DUF3537)                         |
| AT3G23910 | chr3_8793946  | trans | -0,51±0,09 | 3,41E-08 | 0,36 |                                                               |
| AT3G26040 | chr3_9530571  | cis   | -0,77±0,14 | 3,42E-08 | 0,11 | HXXXD-type-acyl-transferase-family-protein                    |
| AT4G11310 | chr4_6879549  | cis   | -0,52±0,09 | 3,42E-08 | 0,31 | Papain-family-cysteine-protease                               |
| AT5G66630 | chr5_26588890 | cis   | -0,52±0,09 | 3,43E-08 | 0,33 | DA1-related-protein-5                                         |
| AT2G04340 | chr2_1498237  | cis   | -0,76±0,14 | 3,43E-08 | 0,11 |                                                               |

|           |               |       |            |          |      |                                                                                               |
|-----------|---------------|-------|------------|----------|------|-----------------------------------------------------------------------------------------------|
| AT4G01580 | chr4_687044   | cis   | 0,5±0,09   | 3,43E-08 | 0,38 | AP2/B3-like-transcriptional-factor-family-protein                                             |
| AT5G42230 | chr5_16879527 | cis   | 0,9±0,16   | 3,44E-08 | 0,07 | serine-carboxypeptidase-like-41                                                               |
| AT2G17280 | chr1_13461629 | trans | -0,62±0,11 | 3,44E-08 | 0,16 | Phosphoglycerate-mutase-family-protein                                                        |
| AT1G02000 | chr1_346022   | cis   | 0,53±0,1   | 3,45E-08 | 0,26 | UDP-D-glucuronate-4-epimerase-2                                                               |
| AT4G14455 | chr4_8309045  | cis   | -0,48±0,09 | 3,45E-08 | 0,45 | Target-SNARE-coiled-coil-domain-protein                                                       |
| AT1G53080 | chr1_19779839 | cis   | -0,51±0,09 | 3,49E-08 | 0,34 | Legume-lectin-family-protein                                                                  |
| AT1G33290 | chr1_12077757 | cis   | 0,55±0,1   | 3,49E-08 | 0,25 | P-loop-containing-nucleoside-triphosphate-hydrolases-superfamily-protein                      |
| AT5G24660 | chr3_15302783 | trans | -0,73±0,13 | 3,50E-08 | 0,12 | response-to-low-sulfur-2                                                                      |
| AT5G02270 | chr5_467255   | cis   | 0,47±0,09  | 3,51E-08 | 0,49 | non-intrinsic-ABC-protein-9                                                                   |
| AT4G36750 | chr4_17326398 | cis   | 0,57±0,1   | 3,52E-08 | 0,27 | Quinone-reductase-family-protein                                                              |
| AT5G64830 | chr5_25916033 | cis   | -0,98±0,18 | 3,53E-08 | 0,06 | programmed-cell-death-2-C-terminal-domain-containing-protein                                  |
| AT5G41970 | chr5_16791339 | cis   | -0,71±0,13 | 3,54E-08 | 0,15 | Metal-dependent-protein-hydrolase                                                             |
| AT5G50450 | chr1_18170823 | trans | 0,51±0,09  | 3,55E-08 | 0,33 | HCP-like-superfamily-protein-with-MYND-type-zinc-finger                                       |
| AT1G04030 | chr1_1049948  | cis   | 0,48±0,09  | 3,56E-08 | 0,46 |                                                                                               |
| AT2G25430 | chr3_18761539 | trans | 0,48±0,09  | 3,57E-08 | 0,29 | epsin-N-terminal-homology-(ENTH)-domain-containing-protein-/clathrin-assembly-protein-related |
| AT3G03360 | chr3_764333   | cis   | -0,53±0,1  | 3,58E-08 | 0,39 | F-box/RNI-like-superfamily-protein                                                            |
| AT1G35230 | chr1_12918273 | cis   | 0,5±0,09   | 3,58E-08 | 0,57 | arabinogalactan-protein-5                                                                     |
| AT1G72330 | chr1_27237295 | cis   | 0,49±0,09  | 3,59E-08 | 0,48 | alanine-aminotransferase-2                                                                    |
| AT1G80750 | chr1_30348415 | cis   | 0,49±0,09  | 3,59E-08 | 0,44 | Ribosomal-protein-L30/L7-family-protein                                                       |
| AT4G27560 | chr4_13759116 | cis   | -0,52±0,09 | 3,59E-08 | 0,36 | UDP-Glycosyltransferase-superfamily-protein                                                   |
| AT5G15920 | chr5_5208450  | cis   | -0,82±0,15 | 3,60E-08 | 0,13 | structural-maintenance-of-chromosomes-5                                                       |
| AT1G22540 | chr1_10151342 | trans | 0,66±0,12  | 3,61E-08 | 0,14 | Major-facilitator-superfamily-protein                                                         |
| AT3G50790 | chr4_5607625  | trans | 0,7±0,13   | 3,62E-08 | 0,12 | esterase/lipase/thioesterase-family-protein                                                   |
| AT1G70430 | chr1_26545813 | cis   | 0,5±0,09   | 3,63E-08 | 0,35 | Protein-kinase-superfamily-protein                                                            |
| AT5G66930 | chr5_26736168 | cis   | 0,58±0,11  | 3,63E-08 | 0,26 |                                                                                               |
| AT1G32375 | chr1_11676019 | cis   | 0,98±0,18  | 3,63E-08 | 0,06 | F-box/RNI-like/FBD-like-domains-containing-protein                                            |
| AT4G09500 | chr4_6017910  | cis   | -0,51±0,09 | 3,64E-08 | 0,48 | UDP-Glycosyltransferase-superfamily-protein                                                   |
| AT3G26340 | chr3_9652112  | cis   | 0,67±0,12  | 3,64E-08 | 0,13 | N-terminal-nucleophile-aminohydrolases-(Ntn-hydrolases)-superfamily-protein                   |
| AT5G11780 | chr1_16840961 | trans | -0,95±0,17 | 3,64E-08 | 0,06 |                                                                                               |
| AT4G31520 | chr4_15281562 | cis   | 0,73±0,13  | 3,66E-08 | 0,11 | SDA1-family-protein                                                                           |
| AT3G55860 | chr3_20729596 | cis   | -0,51±0,09 | 3,68E-08 | 0,29 |                                                                                               |
| AT3G08930 | chr3_2713870  | cis   | 0,51±0,09  | 3,68E-08 | 0,32 | LMBR1-like-membrane-protein                                                                   |
| AT3G17710 | chr3_6089215  | cis   | 0,57±0,1   | 3,69E-08 | 0,24 | F-box-and-associated-interaction-domains-containing-protein                                   |
| AT2G43940 | chr2_18197881 | cis   | 0,48±0,09  | 3,70E-08 | 0,54 | S-adenosyl-L-methionine-dependent-methyltransferases-superfamily-protein                      |

|           |               |       |            |          |      |                                                                            |
|-----------|---------------|-------|------------|----------|------|----------------------------------------------------------------------------|
| AT2G34655 | chr1_8321934  | trans | 0,48±0,09  | 3,70E-08 | 0,41 |                                                                            |
| AT3G02520 | chr3_525833   | cis   | 0,53±0,1   | 3,70E-08 | 0,43 | general-regulatory-factor-7                                                |
| AT3G44660 | chr3_16232070 | cis   | -0,66±0,12 | 3,70E-08 | 0,16 | histone-deacetylase-10                                                     |
| AT2G47980 | chr5_26359562 | trans | 0,75±0,14  | 3,71E-08 | 0,11 | sister-chromatid-cohesion-protein-3                                        |
| AT5G27750 | chr5_9831277  | cis   | 0,61±0,11  | 3,75E-08 | 0,19 | F-box/FBD-like-domains-containing-protein                                  |
| AT2G05100 | chr2_1830877  | cis   | 0,78±0,14  | 3,78E-08 | 0,11 | photosystem-II-light-harvesting-complex-gene-2.1                           |
| AT5G02430 | chr5_530113   | cis   | 0,65±0,12  | 3,78E-08 | 0,16 | Transducin/WD40-repeat-like-superfamily-protein                            |
| AT2G46890 | chr2_11722565 | trans | 0,8±0,15   | 3,78E-08 | 0,08 | Protein-of-unknown-function-(DUF1295)                                      |
| AT2G31980 | chr2_13590583 | cis   | -0,84±0,15 | 3,81E-08 | 0,09 | PHYTOCYSTATIN-2                                                            |
| AT5G20550 | chr5_6958246  | cis   | -0,53±0,1  | 3,83E-08 | 0,48 | 2-oxoglutarate-(2OG)-and-Fe(II)-dependent-oxygenase-superfamily-protein    |
| AT5G14710 | chr4_4437048  | trans | -0,89±0,16 | 3,83E-08 | 0,07 |                                                                            |
| AT1G23750 | chr1_8401967  | cis   | 0,61±0,11  | 3,86E-08 | 0,19 | Nucleic-acid-binding,-OB-fold-like-protein                                 |
| AT4G21410 | chr4_11405085 | cis   | 0,63±0,11  | 3,87E-08 | 0,20 | cysteine-rich-RLK-(RECEPTOR-like-protein-kinase)-29                        |
| AT3G01130 | chr5_11755315 | trans | -0,62±0,11 | 3,88E-08 | 0,14 |                                                                            |
| AT1G20480 | chr1_7097121  | cis   | 0,83±0,15  | 3,88E-08 | 0,09 | AMP-dependent-synthetase-and-ligase-family-protein                         |
| AT3G55140 | chr3_20407685 | cis   | -0,81±0,15 | 3,88E-08 | 0,09 | Pectin-lyase-like-superfamily-protein                                      |
| AT4G19985 | chr4_10833135 | cis   | 0,63±0,12  | 3,88E-08 | 0,16 | Acyl-CoA-N-acyltransferases-(NAT)-superfamily-protein                      |
| AT5G49015 | chr5_19868135 | cis   | -0,48±0,09 | 3,89E-08 | 0,36 | Expressed-protein                                                          |
| AT4G02890 | chr4_2720901  | trans | -0,48±0,09 | 3,89E-08 | 0,60 | Ubiquitin-family-protein                                                   |
| AT3G15710 | chr1_8350453  | trans | 0,73±0,13  | 3,90E-08 | 0,11 | Peptidase-S24/S26A/S26B/S26C-family-protein                                |
| AT1G63180 | chr1_23417693 | cis   | 0,94±0,17  | 3,90E-08 | 0,06 | UDP-D-glucose/UDP-D-galactose-4-epimerase-3                                |
| AT5G57270 | chr1_28930265 | trans | 0,47±0,09  | 3,90E-08 | 0,38 | Core-2/I-branching-beta-1,6-N-acetylglucosaminyltransferase-family-protein |
| AT4G22270 | chr4_11777311 | cis   | -0,52±0,09 | 3,93E-08 | 0,33 | Protein-of-unknown-function-(DUF3537)                                      |
| AT4G23130 | chr4_12119508 | cis   | -0,51±0,09 | 3,94E-08 | 0,42 | cysteine-rich-RLK-(RECEPTOR-like-protein-kinase)-5                         |
| AT3G23080 | chr3_8209226  | cis   | -0,84±0,15 | 3,95E-08 | 0,10 | Polyketide-cyclase/dehydrase-and-lipid-transport-superfamily-protein       |
| AT2G33820 | chr2_14305380 | cis   | -0,56±0,1  | 3,95E-08 | 0,23 | Mitochondrial-substrate-carrier-family-protein                             |
| AT4G01060 | chr4_448429   | cis   | -0,59±0,11 | 3,95E-08 | 0,24 | CAPRICE-like-MYB3                                                          |
| AT2G14170 | chr2_5991119  | cis   | 0,47±0,09  | 3,96E-08 | 0,45 | aldehyde-dehydrogenase--6B2                                                |
| AT4G32970 | chr5_10138211 | trans | -0,74±0,14 | 3,96E-08 | 0,11 |                                                                            |
| AT4G26530 | chr2_6149075  | trans | -0,5±0,09  | 3,98E-08 | 0,29 | Aldolase-superfamily-protein                                               |
| AT5G47380 | chr5_19233935 | cis   | -0,93±0,17 | 4,00E-08 | 0,08 | Protein-of-unknown-function,-DUF547                                        |
| AT3G11530 | chr3_3634582  | cis   | -0,8±0,15  | 4,00E-08 | 0,11 | Vacuolar-protein-sorting-55-(VPS55)-family-protein                         |
| AT1G05310 | chr1_1551431  | cis   | -0,65±0,12 | 4,01E-08 | 0,19 | Pectin-lyase-like-superfamily-protein                                      |
| AT5G41685 | chr5_16669310 | cis   | 0,58±0,11  | 4,01E-08 | 0,21 | Mitochondrial-outer-membrane-translocase-complex,-subunit-Tom7             |

|           |               |       |            |          |      |                                                                |
|-----------|---------------|-------|------------|----------|------|----------------------------------------------------------------|
| AT4G15950 | chr4_9036335  | cis   | -0,48±0,09 | 4,02E-08 | 0,36 | RNA-polymerase-II,-Rpb4,-core-protein                          |
| AT5G54260 | chr5_1280017  | trans | -0,76±0,14 | 4,07E-08 | 0,11 | DNA-repair-and-meiosis-protein-(Mre11)                         |
| AT3G20090 | chr3_7016612  | cis   | 0,62±0,11  | 4,07E-08 | 0,16 | cytochrome-P450,-family-705,-subfamily-A,-polypeptide-18       |
| AT3G45440 | chr3_16659722 | cis   | 0,51±0,09  | 4,07E-08 | 0,34 | Concanavalin-A-like-lectin-protein-kinase-family-protein       |
| AT5G35840 | chr5_14009659 | cis   | 0,51±0,09  | 4,07E-08 | 0,35 | phytochrome-C                                                  |
| AT5G53940 | chr5_21897559 | cis   | -0,71±0,13 | 4,08E-08 | 0,11 | Yippee-family-putative-zinc-binding-protein                    |
| AT1G13570 | chr1_4647283  | cis   | -0,47±0,09 | 4,10E-08 | 0,48 | F-box/RNI-like-superfamily-protein                             |
| AT4G18960 | chr4_10381453 | cis   | 0,55±0,1   | 4,10E-08 | 0,24 | K-box-region-and-MADS-box-transcription-factor-family-protein- |
| AT4G00234 | chr4_124226   | cis   | 0,81±0,15  | 4,10E-08 | 0,10 |                                                                |
| AT1G19480 | chr1_6746695  | cis   | -0,86±0,16 | 4,12E-08 | 0,10 | DNA-glycosylase-superfamily-protein                            |
| AT5G37780 | chr5_15004448 | cis   | -0,51±0,09 | 4,13E-08 | 0,32 | calmodulin-1                                                   |
| AT3G15920 | chr3_5393567  | cis   | 0,76±0,14  | 4,13E-08 | 0,13 | Phox-(PX)-domain-containing-protein                            |
| AT5G12140 | chr5_3923131  | cis   | 0,49±0,09  | 4,13E-08 | 0,39 | cystatin-1                                                     |
| AT1G57770 | chr1_21394811 | cis   | 0,68±0,12  | 4,14E-08 | 0,14 | FAD/NAD(P)-binding-oxidoreductase-family-protein               |
| AT3G21110 | chr1_11165270 | trans | 0,69±0,13  | 4,17E-08 | 0,13 | purin-7                                                        |
| AT1G36060 | chr1_13328534 | trans | 0,55±0,1   | 4,18E-08 | 0,30 | Integrase-type-DNA-binding-superfamily-protein                 |
| AT1G34010 | chr1_12355872 | cis   | -0,67±0,12 | 4,19E-08 | 0,14 |                                                                |
| AT4G02290 | chr3_20966251 | trans | 0,63±0,12  | 4,20E-08 | 0,17 | glycosyl-hydrolase-9B13                                        |
| AT4G39920 | chr4_18519040 | cis   | 0,92±0,17  | 4,21E-08 | 0,07 | C-CAP/cofactor-C-like-domain-containing-protein                |
| AT1G16830 | chr5_16642012 | trans | -0,66±0,12 | 4,21E-08 | 0,14 | Pentatricopeptide-repeat-(PPR)-superfamily-protein             |
| AT1G05835 | chr1_1761767  | cis   | -0,51±0,09 | 4,21E-08 | 0,32 | PHD-finger-protein                                             |
| AT2G11891 | chr2_4804747  | cis   | -0,55±0,1  | 4,22E-08 | 0,24 |                                                                |
| AT4G28706 | chr4_14168669 | cis   | 0,53±0,1   | 4,23E-08 | 0,28 | pfkB-like-carbohydrate-kinase-family-protein                   |
| AT1G55270 | chr3_11813635 | trans | 0,67±0,12  | 4,27E-08 | 0,11 | Galactose-oxidase/kelch-repeat-superfamily-protein             |
| AT2G23110 | chr1_11782965 | trans | 0,68±0,12  | 4,27E-08 | 0,16 | Late-embryogenesis-abundant-protein,-group-6                   |
| AT3G55830 | chr1_12244325 | trans | 0,49±0,09  | 4,27E-08 | 0,31 | Nucleotide-diphospho-sugar-transferases-superfamily-protein    |
| AT3G29000 | chr3_11000751 | cis   | -0,95±0,17 | 4,27E-08 | 0,06 | Calcium-binding-EF-hand-family-protein                         |
| AT4G24240 | chr4_12506621 | trans | -0,79±0,14 | 4,31E-08 | 0,10 | WRKY-DNA-binding-protein-7                                     |
| AT3G48770 | chr3_18088378 | cis   | 0,51±0,09  | 4,36E-08 | 0,33 | DNA-binding;ATP-binding                                        |
| AT1G67870 | chr3_18783571 | trans | 0,69±0,13  | 4,38E-08 | 0,14 | glycine-rich-protein                                           |
| AT5G47720 | chr5_19342075 | cis   | 0,45±0,08  | 4,38E-08 | 0,46 | Thiolase-family-protein                                        |
| AT5G67488 | chr1_20695617 | trans | -0,45±0,08 | 4,39E-08 | 0,43 | other-RNA                                                      |
| ATCG00270 | chr4_6933846  | trans | 0,93±0,17  | 4,40E-08 | 0,94 | photosystem-II-reaction-center-protein-D                       |
| AT3G06125 | chr3_1842299  | cis   | -0,5±0,09  | 4,41E-08 | 0,44 | other-RNA                                                      |

|           |               |       |            |          |      |                                                                                           |
|-----------|---------------|-------|------------|----------|------|-------------------------------------------------------------------------------------------|
| AT2G32140 | chr2_13656947 | cis   | -0,49±0,09 | 4,41E-08 | 0,40 | transmembrane-receptors                                                                   |
| AT5G47320 | chr5_19203832 | cis   | -0,81±0,15 | 4,42E-08 | 0,09 | ribosomal-protein-S19                                                                     |
| AT1G60545 | chr1_22304145 | cis   | -0,49±0,09 | 4,49E-08 | 0,46 | other-RNA                                                                                 |
| AT4G38545 | chr4_18025338 | cis   | 0,89±0,16  | 4,49E-08 | 0,08 | other-RNA                                                                                 |
| AT5G48490 | chr5_19651751 | cis   | 0,52±0,09  | 4,50E-08 | 0,34 | Bifunctional-inhibitor/lipid-transfer-protein/seed-storage-2S-albumin-superfamily-protein |
| AT4G01500 | chr1_516502   | trans | 0,6±0,11   | 4,51E-08 | 0,21 | AP2/B3-like-transcriptional-factor-family-protein                                         |
| AT2G11000 | chr3_11690914 | trans | 0,79±0,15  | 4,53E-08 | 0,12 | MAK10-homologue                                                                           |
| AT3G06210 | chr3_1954194  | trans | 0,68±0,12  | 4,54E-08 | 0,16 | ARM-repeat-superfamily-protein                                                            |
| AT2G38530 | chr5_25213415 | trans | 0,49±0,09  | 4,56E-08 | 0,52 | lipid-transfer-protein-2                                                                  |
| AT1G13970 | chr1_4789634  | cis   | -0,55±0,1  | 4,56E-08 | 0,24 | Protein-of-unknown-function-(DUF1336)                                                     |
| AT1G61240 | chr1_22580363 | cis   | 0,57±0,1   | 4,57E-08 | 0,24 | Protein-of-unknown-function-(DUF707)                                                      |
| AT4G02900 | chr4_1267655  | cis   | 0,59±0,11  | 4,58E-08 | 0,26 | ERD-(early-responsive-to-dehydration-stress)-family-protein                               |
| AT3G17510 | chr3_5993315  | cis   | -0,5±0,09  | 4,62E-08 | 0,42 | CBL-interacting-protein-kinase-1                                                          |
| AT4G10610 | chr4_6557083  | cis   | 0,52±0,1   | 4,62E-08 | 0,26 | CTC-interacting-domain-12                                                                 |
| AT5G09930 | chr5_3100426  | cis   | -0,7±0,13  | 4,64E-08 | 0,15 | ABC-transporter-family-protein                                                            |
| AT1G12750 | chr1_4323408  | cis   | -0,58±0,11 | 4,64E-08 | 0,32 | RHOMBOID-like-protein-6                                                                   |
| AT1G61280 | chr1_22603684 | cis   | -0,48±0,09 | 4,64E-08 | 0,42 | Phosphatidylinositol-N-acetylglucosaminyltransferase,-GPI19/PIG-P-subunit                 |
| AT5G42250 | chr5_16895056 | cis   | 0,47±0,09  | 4,65E-08 | 0,53 | Zinc-binding-alcohol-dehydrogenase-family-protein                                         |
| AT1G20380 | chr1_7061163  | cis   | 0,64±0,12  | 4,65E-08 | 0,16 | Prolyl-oligopeptidase-family-protein                                                      |
| AT1G75560 | chr1_28373198 | cis   | 0,57±0,1   | 4,67E-08 | 0,21 | zinc-knuckle-(CCHC-type)-family-protein                                                   |
| AT3G57680 | chr3_21385591 | cis   | -0,57±0,1  | 4,68E-08 | 0,27 | Peptidase-S41-family-protein                                                              |
| AT5G05240 | chr4_6150083  | trans | 0,73±0,13  | 4,69E-08 | 0,11 | Uncharacterised-conserved-protein-(UCP030365)                                             |
| AT5G42570 | chr5_17022679 | cis   | -0,49±0,09 | 4,69E-08 | 0,48 | B-cell-receptor-associated-31-like                                                        |
| AT3G18880 | chr3_6511656  | cis   | 0,67±0,12  | 4,70E-08 | 0,15 | Nucleic-acid-binding,-OB-fold-like-protein                                                |
| AT4G14590 | chr5_14551793 | trans | 0,72±0,13  | 4,71E-08 | 0,12 | embryo-defective-2739                                                                     |
| AT5G48790 | chr5_19781596 | cis   | 0,53±0,1   | 4,72E-08 | 0,29 | Domain-of-unknown-function-(DUF1995)                                                      |
| AT1G76850 | chr1_28854365 | cis   | 0,62±0,11  | 4,73E-08 | 0,18 | exocyst-complex-component-sec5                                                            |
| AT2G07727 | chr2_15109656 | trans | -0,58±0,11 | 4,78E-08 | 0,16 | Di-haem-cytochrome,-transmembrane;Cytochrome-b/b6,-C-terminal                             |
| AT4G28500 | chr1_17370274 | trans | -0,49±0,09 | 4,79E-08 | 0,36 | NAC-domain-containing-protein-73                                                          |
| AT2G16630 | chr5_7783637  | trans | -0,67±0,12 | 4,80E-08 | 0,14 | Pollen-Ole-e-1-allergen-and-extensin-family-protein                                       |
| AT5G04510 | chr5_10076415 | trans | 0,47±0,09  | 4,82E-08 | 0,61 | 3'-phosphoinositide-dependent-protein-kinase-1                                            |
| AT3G46740 | chr4_12536294 | trans | 0,91±0,17  | 4,86E-08 | 0,07 | translocon-at-the-outer-envelope-membrane-of-chloroplasts-75-III                          |
| AT1G71730 | chr1_26984099 | cis   | -0,5±0,09  | 4,88E-08 | 0,31 |                                                                                           |
| AT5G66180 | chr1_24769415 | trans | -0,48±0,09 | 4,89E-08 | 0,34 | S-adenosyl-L-methionine-dependent-methyltransferases-superfamily-protein                  |

|           |               |       |            |          |      |                                                                   |
|-----------|---------------|-------|------------|----------|------|-------------------------------------------------------------------|
| AT3G26744 | chr3_9833104  | cis   | -0,53±0,1  | 4,90E-08 | 0,31 | basic-helix-loop-helix-(bHLH)-DNA-binding-superfamily-protein     |
| AT4G14420 | chr4_8301491  | cis   | 0,69±0,13  | 4,91E-08 | 0,13 | HR-like-lesion-inducing-protein-related                           |
| AT1G65420 | chr1_24290690 | cis   | -0,57±0,11 | 4,92E-08 | 0,23 | Protein-of-unknown-function-(DUF565)                              |
| AT5G49780 | chr5_20471774 | trans | -0,47±0,09 | 4,92E-08 | 0,43 | Leucine-rich-repeat-protein-kinase-family-protein                 |
| AT1G66510 | chr1_24821866 | cis   | 0,66±0,12  | 4,95E-08 | 0,15 | AAR2-protein-family                                               |
| AT1G19080 | chr1_6586637  | cis   | -0,78±0,14 | 4,95E-08 | 0,09 | GINS-complex-protein                                              |
| AT4G17190 | chr4_9648315  | cis   | -0,57±0,11 | 4,96E-08 | 0,21 | farnesyl-diphosphate-synthase-2                                   |
| AT4G09920 | chr4_6224093  | cis   | 0,69±0,13  | 5,01E-08 | 0,11 | FBD,-F-box-and-Leucine-Rich-Repeat-domains-containing-protein     |
| AT3G32410 | chr2_10654331 | trans | 0,51±0,09  | 5,03E-08 | 0,31 |                                                                   |
| AT3G50820 | chr4_5706995  | trans | 0,49±0,09  | 5,03E-08 | 0,44 | photosystem-II-subunit-O-2                                        |
| AT2G26460 | chr2_11264873 | cis   | -0,5±0,09  | 5,03E-08 | 0,36 | RED-family-protein                                                |
| AT1G31200 | chr1_11147801 | cis   | 01,±0,18   | 5,04E-08 | 0,06 | phloem-protein-2-A9                                               |
| AT1G65520 | chr5_798776   | trans | 0,46±0,08  | 5,05E-08 | 0,44 | delta(3),-delta(2)-enoyl-CoA-isomerase-1                          |
| AT2G28140 | chr1_29869612 | trans | -0,65±0,12 | 5,06E-08 | 0,15 | Protein-of-unknown-function-(DUF1635)                             |
| AT1G25375 | chr1_8906159  | cis   | 0,46±0,08  | 5,06E-08 | 0,42 | Metallo-hydrolase/oxidoreductase-superfamily-protein              |
| AT1G29370 | chr1_17275275 | trans | -0,69±0,13 | 5,06E-08 | 0,14 | Kinase-related-protein-of-unknown-function-(DUF1296)              |
| AT3G19260 | chr3_6672304  | cis   | 01,11±0,2  | 5,06E-08 | 0,06 | LAG1-homologue-2                                                  |
| AT5G53020 | chr5_21484313 | cis   | -01,±0,18  | 5,06E-08 | 0,06 | Ribonuclease-P-protein-subunit-P38-related                        |
| AT3G50880 | chr3_18914843 | cis   | -0,5±0,09  | 5,07E-08 | 0,37 | DNA-glycosylase-superfamily-protein                               |
| AT2G43080 | chr1_1291559  | trans | 0,51±0,09  | 5,08E-08 | 0,27 | P4H-isoform-1                                                     |
| AT3G43540 | chr3_15405270 | cis   | 0,47±0,09  | 5,08E-08 | 0,43 | Protein-of-unknown-function-(DUF1350)                             |
| AT5G43570 | chr5_17507130 | cis   | -0,47±0,09 | 5,10E-08 | 0,50 | Serine-protease-inhibitor,-potato-inhibitor-I-type-family-protein |
| AT2G04850 | chr2_1704360  | cis   | -0,72±0,13 | 5,10E-08 | 0,13 | Auxin-responsive-family-protein                                   |
| AT4G35070 | chr2_11761904 | trans | 0,54±0,1   | 5,14E-08 | 0,24 | SBP-(S-ribonuclease-binding-protein)-family-protein               |
| AT1G07180 | chr2_11761927 | trans | -0,61±0,11 | 5,14E-08 | 0,18 | alternative--NAD(P)H-dehydrogenase-1                              |
| AT1G01610 | chr5_13313436 | trans | 0,57±0,1   | 5,16E-08 | 0,21 | glycerol-3-phosphate-acyltransferase-4                            |
| AT1G70950 | chr1_26759495 | cis   | 0,55±0,1   | 5,18E-08 | 0,27 | TPX2-(targeting-protein-for-Xklp2)-protein-family                 |
| AT4G14720 | chr4_8435420  | cis   | -0,46±0,09 | 5,19E-08 | 0,54 | TIFY-domain/Divergent-CCT-motif-family-protein                    |
| AT4G07825 | chr4_1821236  | trans | 0,75±0,14  | 5,20E-08 | 0,16 |                                                                   |
| AT4G00180 | chr2_11761927 | trans | -0,6±0,11  | 5,24E-08 | 0,18 | Plant-specific-transcription-factor-YABBY-family-protein          |
| AT4G16970 | chr4_9554731  | cis   | 0,5±0,09   | 5,26E-08 | 0,31 | Protein-kinase-superfamily-protein                                |
| AT2G04795 | chr2_1656543  | cis   | -0,71±0,13 | 5,26E-08 | 0,11 |                                                                   |
| AT1G78970 | chr1_29703723 | cis   | 0,58±0,11  | 5,28E-08 | 0,20 | lupeol-synthase-1                                                 |
| AT2G40970 | chr2_17098828 | cis   | 0,49±0,09  | 5,28E-08 | 0,49 | Homeodomain-like-superfamily-protein                              |



|           |               |       |            |          |      |                                                               |
|-----------|---------------|-------|------------|----------|------|---------------------------------------------------------------|
| AT4G10930 | chr4_6714161  | cis   | 0,69±0,13  | 5,30E-08 | 0,14 |                                                               |
| AT1G07230 | chr2_1136489  | trans | -0,65±0,12 | 5,31E-08 | 0,14 | non-specific-phospholipase-C1                                 |
| AT1G51390 | chr1_19049510 | cis   | -0,7±0,13  | 5,32E-08 | 0,11 | NFU-domain-protein-5                                          |
| AT4G31130 | chr2_8285903  | trans | -0,71±0,13 | 5,32E-08 | 0,14 | Protein-of-unknown-function-(DUF1218)                         |
| AT3G61620 | chr3_22801958 | cis   | 0,55±0,1   | 5,32E-08 | 0,24 | 3'-5'-exoribonuclease-family-protein                          |
| AT4G38460 | chr4_17984808 | cis   | -0,86±0,16 | 5,34E-08 | 0,09 | geranylgeranyl-reductase                                      |
| AT5G49930 | chr5_20314076 | cis   | -0,52±0,1  | 5,37E-08 | 0,33 | zinc-knuckle-(CCHC-type)-family-protein                       |
| AT2G13600 | chr2_5671648  | cis   | 0,58±0,11  | 5,38E-08 | 0,22 | Pentatricopeptide-repeat-(PPR)-superfamily-protein            |
| AT5G24280 | chr5_8262612  | cis   | 0,65±0,12  | 5,38E-08 | 0,16 | gamma-irradiation-and-mitomycin-c-induced-1                   |
| AT2G35340 | chr2_16507075 | trans | 01,16±0,21 | 5,39E-08 | 0,05 | helicase-domain-containing-protein                            |
| AT2G28870 | chr1_19250971 | trans | -0,48±0,09 | 5,39E-08 | 0,34 |                                                               |
| AT3G48300 | chr3_17885422 | cis   | -0,65±0,12 | 5,39E-08 | 0,17 | cytochrome-P450,-family-71,-subfamily-A,-polypeptide-23       |
| AT2G35859 | chr1_14188364 | trans | -0,5±0,09  | 5,39E-08 | 0,24 |                                                               |
| AT1G15910 | chr1_5468316  | cis   | -0,54±0,1  | 5,39E-08 | 0,31 | XH/XS-domain-containing-protein                               |
| AT5G47770 | chr5_19338000 | cis   | -0,49±0,09 | 5,40E-08 | 0,38 | farnesyl-diphosphate-synthase-1                               |
| AT3G46900 | chr4_10861994 | trans | 0,89±0,16  | 5,41E-08 | 0,07 | copper-transporter-2                                          |
| AT1G35710 | chr2_4042995  | trans | -0,85±0,16 | 5,41E-08 | 0,10 | Protein-kinase-family-protein-with-leucine-rich-repeat-domain |
| AT4G17910 | chr4_9950250  | cis   | 0,57±0,1   | 5,43E-08 | 0,23 | transferases,-transferring-acyl-groups                        |
| AT5G03795 | chr5_1010033  | cis   | -0,46±0,08 | 5,44E-08 | 0,51 | Exostosin-family-protein                                      |
| AT5G37360 | chr5_14836321 | cis   | -0,51±0,09 | 5,45E-08 | 0,31 |                                                               |
| AT5G22875 | chr5_7652304  | cis   | 0,53±0,1   | 5,45E-08 | 0,33 |                                                               |
| AT4G00780 | chr5_20301461 | trans | -0,64±0,12 | 5,46E-08 | 0,16 | TRAF-like-family-protein                                      |
| AT5G41800 | chr5_16733689 | cis   | -0,53±0,1  | 5,47E-08 | 0,28 | Transmembrane-amino-acid-transporter-family-protein           |
| AT1G59970 | chr4_6432632  | trans | -0,86±0,16 | 5,47E-08 | 0,09 | Matrixin-family-protein                                       |
| AT5G47310 | chr5_19200283 | cis   | -0,5±0,09  | 5,47E-08 | 0,33 | PPPDE-putative-thiol-peptidase-family-protein                 |
| AT1G09480 | chr1_3060171  | cis   | -0,5±0,09  | 5,49E-08 | 0,30 | NAD(P)-binding-Rossmann-fold-superfamily-protein              |
| AT3G48410 | chr3_17927998 | cis   | 0,46±0,09  | 5,50E-08 | 0,44 | alpha/beta-Hydrolases-superfamily-protein                     |
| AT3G08970 | chr3_2737991  | cis   | 0,55±0,1   | 5,51E-08 | 0,24 | DNAJ-heat-shock-N-terminal-domain-containing-protein          |
| AT5G10390 | chr5_3281886  | cis   | 0,58±0,11  | 5,52E-08 | 0,22 | Histone-superfamily-protein                                   |
| AT3G01170 | chr1_27132991 | trans | 0,47±0,09  | 5,53E-08 | 0,43 | Ribosomal-protein-L34e-superfamily-protein                    |
| AT3G15534 | chr5_2832203  | trans | 0,75±0,14  | 5,55E-08 | 0,09 |                                                               |
| AT1G30320 | chr5_22536612 | trans | -0,55±0,1  | 5,56E-08 | 0,26 | Remorin-family-protein                                        |
| AT4G17245 | chr4_9668933  | cis   | -0,57±0,11 | 5,57E-08 | 0,20 | RING/U-box-superfamily-protein                                |
| AT4G15620 | chr4_8913888  | cis   | -0,48±0,09 | 5,60E-08 | 0,34 | Uncharacterised-protein-family-(UPF0497)                      |

|           |               |       |            |          |      |                                                                                      |
|-----------|---------------|-------|------------|----------|------|--------------------------------------------------------------------------------------|
| AT3G20150 | chr4_12325778 | trans | 0,45±0,08  | 5,62E-08 | 0,48 | Kinesin-motor-family-protein                                                         |
| AT3G27730 | chr3_10279321 | cis   | 0,61±0,11  | 5,62E-08 | 0,16 | ATP-binding;ATP-dependent-helicases;DNA-helicases                                    |
| AT1G05710 | chr1_1715035  | cis   | -0,48±0,09 | 5,62E-08 | 0,41 | basic-helix-loop-helix-(bHLH)-DNA-binding-superfamily-protein                        |
| AT4G37310 | chr4_17551488 | cis   | 0,87±0,16  | 5,64E-08 | 0,10 | cytochrome-P450,-family-81,-subfamily-H,-polypeptide-1                               |
| AT1G05630 | chr1_1681154  | cis   | -0,67±0,12 | 5,65E-08 | 0,16 | Endonuclease/exonuclease/phosphatase-family-protein                                  |
| AT4G03038 | chr3_23145836 | trans | 0,6±0,11   | 5,65E-08 | 0,17 | other-RNA                                                                            |
| AT2G05120 | chr2_1761985  | trans | -0,61±0,11 | 5,68E-08 | 0,17 | Nucleoporin,-Nup133/Nup155-like                                                      |
| AT2G27920 | chr2_11890106 | cis   | 0,85±0,16  | 5,69E-08 | 0,09 | serine-carboxypeptidase-like-51                                                      |
| AT1G63660 | chr1_23603515 | cis   | 0,6±0,11   | 5,70E-08 | 0,19 | GMP-synthase-(glutamine-hydrolyzing),-putative/-glutamine-amidotransferase,-putative |
| AT5G53000 | chr1_22688724 | trans | 0,47±0,09  | 5,71E-08 | 0,36 | 2A-phosphatase-associated-protein-of-46-kD                                           |
| AT1G21190 | chr1_7419967  | cis   | 0,48±0,09  | 5,75E-08 | 0,41 | Small-nuclear-ribonucleoprotein-family-protein                                       |
| AT1G10740 | chr1_3570713  | cis   | -0,89±0,16 | 5,76E-08 | 0,07 | alpha/beta-Hydrolases-superfamily-protein                                            |
| AT3G17450 | chr3_5976256  | cis   | 0,84±0,15  | 5,76E-08 | 0,09 | hAT-dimerisation-domain-containing-protein                                           |
| AT1G30050 | chr3_18941904 | trans | -0,45±0,08 | 5,80E-08 | 0,39 |                                                                                      |
| AT1G63260 | chr1_23468482 | cis   | -0,55±0,1  | 5,81E-08 | 0,25 | tetraspanin10                                                                        |
| AT1G28340 | chr1_9940044  | cis   | 0,68±0,12  | 5,85E-08 | 0,13 | receptor-like-protein-4                                                              |
| AT5G54165 | chr5_22001192 | cis   | -0,69±0,13 | 5,91E-08 | 0,17 |                                                                                      |
| AT1G63770 | chr1_23656988 | cis   | -0,45±0,08 | 5,92E-08 | 0,41 | Peptidase-M1-family-protein                                                          |
| AT4G22380 | chr4_11866232 | trans | 0,63±0,12  | 5,93E-08 | 0,16 | Ribosomal-protein-L7Ae/L30e/S12e/Gadd45-family-protein                               |
| AT3G14395 | chr3_4816176  | cis   | 0,5±0,09   | 5,95E-08 | 0,34 |                                                                                      |
| AT1G80860 | chr1_30400563 | cis   | 0,48±0,09  | 5,97E-08 | 0,54 | phospholipid-N-methyltransferase                                                     |
| AT2G17880 | chr4_14837841 | trans | 0,48±0,09  | 5,97E-08 | 0,36 | Chaperone-DnaJ-domain-superfamily-protein                                            |
| AT2G33000 | chr2_14010015 | cis   | -0,78±0,14 | 5,98E-08 | 0,09 | ubiquitin-associated-(UBA)/TS-N-domain-containing-protein-related                    |
| AT5G05230 | chr1_14941234 | trans | 0,89±0,16  | 5,99E-08 | 0,06 | RING/U-box-superfamily-protein                                                       |
| AT1G53910 | chr5_14063988 | trans | -0,67±0,12 | 6,00E-08 | 0,14 | related-to-AP2-12                                                                    |
| AT1G16250 | chr1_5556456  | cis   | -0,47±0,09 | 6,01E-08 | 0,49 | Galactose-oxidase/kelch-repeat-superfamily-protein                                   |
| AT5G03870 | chr5_17815863 | trans | 0,5±0,09   | 6,01E-08 | 0,31 | Glutaredoxin-family-protein                                                          |
| AT2G17630 | chr2_7666708  | cis   | 0,49±0,09  | 6,01E-08 | 0,35 | Pyridoxal-phosphate-(PLP)-dependent-transferases-superfamily-protein                 |
| AT5G43150 | chr5_17319150 | cis   | 0,47±0,09  | 6,01E-08 | 0,43 |                                                                                      |
| AT5G25020 | chr5_8610661  | cis   | -0,47±0,09 | 6,03E-08 | 0,43 | Protein-of-unknown-function-(DUF1336)                                                |
| AT3G46290 | chr4_7306359  | trans | -0,77±0,14 | 6,05E-08 | 0,11 | hercules-receptor-kinase-1                                                           |
| AT3G18485 | chr3_6347954  | cis   | 0,6±0,11   | 6,06E-08 | 0,18 | iaa-leucine-resistant-2                                                              |
| AT5G51460 | chr5_20900660 | cis   | -0,7±0,13  | 6,09E-08 | 0,15 | Haloacid-dehalogenase-like-hydrolase-(HAD)-superfamily-protein                       |
| AT1G32090 | chr1_11544946 | cis   | 0,5±0,09   | 6,10E-08 | 0,34 | early-responsive-to-dehydration-stress-protein-(ERD4)                                |

|           |               |       |            |          |      |                                                                          |
|-----------|---------------|-------|------------|----------|------|--------------------------------------------------------------------------|
| AT4G36195 | chr5_15502500 | trans | 0,54±0,1   | 6,10E-08 | 0,22 | Serine-carboxypeptidase-S28-family-protein                               |
| AT3G53490 | chr3_19829246 | cis   | 0,81±0,15  | 6,12E-08 | 0,09 |                                                                          |
| AT1G06570 | chr3_13898892 | trans | 0,64±0,12  | 6,13E-08 | 0,14 | phytoene-desaturation-1                                                  |
| AT1G11180 | chr1_3747109  | cis   | -0,77±0,14 | 6,13E-08 | 0,11 | Secretory-carrier-membrane-protein-(SCAMP)-family-protein                |
| AT1G34340 | chr1_12533162 | cis   | 0,78±0,14  | 6,14E-08 | 0,09 | alpha/beta-Hydrolases-superfamily-protein                                |
| AT1G20693 | chr1_7177247  | cis   | -0,51±0,09 | 6,15E-08 | 0,31 | high-mobility-group-B2                                                   |
| AT1G70830 | chr1_26712764 | cis   | 0,5±0,09   | 6,16E-08 | 0,31 | MLP-like-protein-28                                                      |
| AT2G35090 | chr2_14783232 | cis   | 0,46±0,09  | 6,18E-08 | 0,49 | Protein-of-unknown-function-(DUF1640)                                    |
| AT1G22470 | chr2_1700789  | trans | 0,82±0,15  | 6,20E-08 | 0,09 |                                                                          |
| AT1G07350 | chr1_2260475  | cis   | 0,48±0,09  | 6,20E-08 | 0,45 | RNA-binding-(RRM/RBD/RNP-motifs)-family-protein                          |
| AT5G15750 | chr5_5142587  | cis   | -0,48±0,09 | 6,21E-08 | 0,59 | Alpha-L-RNA-binding-motif/Ribosomal-protein-S4-family-protein            |
| AT4G25490 | chr3_17166734 | trans | -0,55±0,1  | 6,22E-08 | 0,20 | C-repeat/DRE-binding-factor-1                                            |
| AT4G02360 | chr4_1042631  | cis   | 0,54±0,1   | 6,22E-08 | 0,26 | Protein-of-unknown-function,-DUF538                                      |
| AT1G65110 | chr1_24189970 | cis   | -0,59±0,11 | 6,23E-08 | 0,20 | Ubiquitin-carboxyl-terminal-hydrolase-related-protein                    |
| AT5G02620 | chr5_590556   | cis   | 0,48±0,09  | 6,33E-08 | 0,40 | ankyrin-like1                                                            |
| AT2G20850 | chr2_9019507  | cis   | -0,86±0,16 | 6,33E-08 | 0,14 | STRUBBELIG-receptor-family-1                                             |
| AT3G51350 | chr3_19061350 | cis   | -0,72±0,13 | 6,38E-08 | 0,12 | Eukaryotic-aspartyl-protease-family-protein                              |
| AT1G45000 | chr1_16980716 | cis   | 0,47±0,09  | 6,39E-08 | 0,35 | AAA-type-ATPase-family-protein                                           |
| AT4G21320 | chr4_11340530 | cis   | -0,79±0,15 | 6,39E-08 | 0,09 | Aldolase-type-TIM-barrel-family-protein                                  |
| AT2G25260 | chr2_10760230 | cis   | -0,54±0,1  | 6,40E-08 | 0,34 |                                                                          |
| AT5G24020 | chr5_8143249  | cis   | 0,58±0,11  | 6,42E-08 | 0,20 | septum-site-determining-protein-(MIND)                                   |
| AT1G75440 | chr1_28305576 | cis   | -0,8±0,15  | 6,44E-08 | 0,11 | ubiquitin-conjugating-enzyme-16                                          |
| AT1G14185 | chr4_6606970  | trans | 0,46±0,08  | 6,44E-08 | 0,40 | Glucose-methanol-choline-(GMC)-oxidoreductase-family-protein             |
| AT3G21950 | chr1_8057048  | trans | -0,58±0,11 | 6,44E-08 | 0,20 | S-adenosyl-L-methionine-dependent-methyltransferases-superfamily-protein |
| AT2G20560 | chr3_17642577 | trans | -0,49±0,09 | 6,46E-08 | 0,34 | DNAJ-heat-shock-family-protein                                           |
| AT5G16080 | chr2_1190927  | trans | 0,6±0,11   | 6,48E-08 | 0,20 | carboxyesterase-17                                                       |
| AT3G56220 | chr3_20854013 | cis   | 0,47±0,09  | 6,49E-08 | 0,39 | transcription-regulators                                                 |
| AT2G46290 | chr2_19007924 | cis   | 0,77±0,14  | 6,50E-08 | 0,10 | Transducin/WD40-repeat-like-superfamily-protein                          |
| AT5G25470 | chr5_8867659  | cis   | -0,75±0,14 | 6,52E-08 | 0,11 | AP2/B3-like-transcriptional-factor-family-protein                        |
| AT3G22880 | chr3_8085466  | cis   | 0,63±0,12  | 6,54E-08 | 0,16 | DNA-repair-(Rad51)-family-protein                                        |
| AT3G54600 | chr3_20210243 | cis   | 0,77±0,14  | 6,55E-08 | 0,11 | Class-I-glutamine-amidotransferase-like-superfamily-protein              |
| AT2G46240 | chr4_10473876 | trans | 0,84±0,16  | 6,55E-08 | 0,08 | BCL-2-associated-athanogene-6                                            |
| AT1G12530 | chr1_4270479  | cis   | -0,49±0,09 | 6,56E-08 | 0,39 |                                                                          |
| AT3G07800 | chr3_2491135  | cis   | 0,61±0,11  | 6,58E-08 | 0,19 | Thymidine-kinase                                                         |

|           |               |       |            |          |      |                                                                              |
|-----------|---------------|-------|------------|----------|------|------------------------------------------------------------------------------|
| AT4G36620 | chr1_22073816 | trans | 0,47±0,09  | 6,60E-08 | 0,34 | GATA-transcription-factor-19                                                 |
| AT5G64240 | chr1_12455969 | trans | 0,52±0,1   | 6,62E-08 | 0,24 | metacaspase-3                                                                |
| AT3G51100 | chr3_803907   | trans | 0,51±0,1   | 6,63E-08 | 0,34 |                                                                              |
| AT5G47280 | chr5_19207371 | cis   | 0,94±0,17  | 6,64E-08 | 0,06 | ADR1-like-3                                                                  |
| AT4G38330 | chr4_17952125 | cis   | -0,66±0,12 | 6,65E-08 | 0,14 | Integral-membrane-protein-hemolysin-III-homolog                              |
| AT4G17510 | chr4_9768732  | cis   | 0,51±0,09  | 6,65E-08 | 0,29 | ubiquitin-C-terminal-hydrolase-3                                             |
| AT4G12390 | chr4_7338121  | cis   | 0,45±0,08  | 6,68E-08 | 0,51 | pectin-methylesterase-inhibitor-1                                            |
| AT3G04181 | chr5_525023   | trans | -0,82±0,15 | 6,69E-08 | 0,09 |                                                                              |
| AT5G42950 | chr4_10249006 | trans | 0,8±0,15   | 6,69E-08 | 0,09 | GYF-domain-containing-protein                                                |
| AT4G00430 | chr4_188619   | cis   | -0,67±0,12 | 6,71E-08 | 0,14 | plasma-membrane-intrinsic-protein-1;4                                        |
| AT2G45520 | chr3_19499785 | trans | -0,53±0,1  | 6,72E-08 | 0,27 |                                                                              |
| AT5G44750 | chr5_18049110 | cis   | -0,88±0,16 | 6,73E-08 | 0,09 | DNA-directed-DNA-polymerases                                                 |
| AT1G33790 | chr1_12236202 | cis   | -0,47±0,09 | 6,73E-08 | 0,46 | jacalin-lectin-family-protein                                                |
| AT1G21240 | chr1_7447447  | cis   | 0,68±0,13  | 6,75E-08 | 0,13 | wall-associated-kinase-3                                                     |
| AT4G33410 | chr4_16068297 | cis   | -0,74±0,14 | 6,76E-08 | 0,11 | SIGNAL-PEPTIDE-PEPTIDASE-LIKE-1                                              |
| AT5G24210 | chr5_21443089 | trans | 0,62±0,12  | 6,77E-08 | 0,16 | alpha/beta-Hydrolases-superfamily-protein                                    |
| AT1G64640 | chr1_24025567 | cis   | 0,53±0,1   | 6,77E-08 | 0,24 | early-nodulin-like-protein-8                                                 |
| AT2G18260 | chr3_8435111  | trans | 0,5±0,09   | 6,80E-08 | 0,74 | syntaxin-of-plants-112                                                       |
| AT1G21220 | chr1_7428601  | cis   | 0,76±0,14  | 6,80E-08 | 0,11 | transposable-element-gene                                                    |
| AT3G10572 | chr3_3305801  | cis   | 0,65±0,12  | 6,82E-08 | 0,16 | 3-phosphoinositide-dependent-protein-kinase-1,-putative                      |
| AT3G16390 | chr5_5637212  | trans | 0,62±0,11  | 6,82E-08 | 0,19 | nitrile-specifier-protein-3                                                  |
| AT5G08520 | chr5_18775630 | trans | 0,61±0,11  | 6,82E-08 | 0,16 | Duplicated-homeodomain-like-superfamily-protein                              |
| AT5G36210 | chr5_14266897 | cis   | 0,49±0,09  | 6,83E-08 | 0,35 | alpha/beta-Hydrolases-superfamily-protein                                    |
| AT3G51910 | chr3_19266344 | cis   | -0,49±0,09 | 6,87E-08 | 0,43 | heat-shock-transcription-factor--A7A                                         |
| AT5G08010 | chr5_2571805  | cis   | 0,52±0,1   | 6,88E-08 | 0,29 |                                                                              |
| AT4G27640 | chr4_13796410 | cis   | 0,53±0,1   | 6,90E-08 | 0,24 | ARM-repeat-superfamily-protein                                               |
| AT1G32190 | chr5_3215635  | trans | -0,45±0,08 | 6,90E-08 | 0,44 | alpha/beta-Hydrolases-superfamily-protein                                    |
| AT5G62300 | chr5_25022670 | cis   | 0,54±0,1   | 6,91E-08 | 0,31 | Ribosomal-protein-S10p/S20e-family-protein                                   |
| AT3G14172 | chr3_4698372  | cis   | 0,66±0,12  | 6,91E-08 | 0,16 |                                                                              |
| AT2G42800 | chr4_11025667 | trans | 0,84±0,15  | 6,92E-08 | 0,08 | receptor-like-protein-29                                                     |
| AT2G17700 | chr2_7690887  | cis   | -0,56±0,1  | 6,95E-08 | 0,26 | ACT-like-protein-tyrosine-kinase-family-protein                              |
| AT3G48210 | chr3_17851438 | cis   | 0,53±0,1   | 6,95E-08 | 0,29 |                                                                              |
| AT3G22520 | chr3_7974995  | cis   | -0,7±0,13  | 6,98E-08 | 0,12 |                                                                              |
| AT1G78820 | chr1_29636012 | cis   | 0,47±0,09  | 7,01E-08 | 0,39 | D-mannose-binding-lectin-protein-with-Apple-like-carbohydrate-binding-domain |

|           |               |       |            |          |      |                                                                                 |
|-----------|---------------|-------|------------|----------|------|---------------------------------------------------------------------------------|
| AT1G06310 | chr1_18905090 | trans | 0,72±0,13  | 7,02E-08 | 0,12 | acyl-CoA-oxidase-6                                                              |
| AT1G13550 | chr1_4638319  | cis   | -0,45±0,08 | 7,02E-08 | 0,43 | Protein-of-unknown-function-(DUF1262)                                           |
| AT4G25610 | chr3_14029684 | trans | -0,52±0,1  | 7,03E-08 | 0,27 | C2H2-like-zinc-finger-protein                                                   |
| AT1G32740 | chr4_11304047 | trans | 0,67±0,12  | 7,05E-08 | 0,14 | SBP-(S-ribonuclease-binding-protein)-family-protein                             |
| AT3G57950 | chr3_8150023  | trans | -0,94±0,18 | 7,05E-08 | 0,07 |                                                                                 |
| AT3G27906 | chr3_10356114 | cis   | -0,83±0,15 | 7,09E-08 | 0,08 |                                                                                 |
| AT4G14350 | chr4_8256892  | cis   | -0,58±0,11 | 7,11E-08 | 0,19 | AGC-(cAMP-dependent,-cGMP-dependent-and-protein-kinase-C)-kinase-family-protein |
| AT1G14660 | chr1_5030827  | cis   | -0,98±0,18 | 7,13E-08 | 0,06 | Na <sup>+</sup> /H <sup>+</sup> -exchanger-8                                    |
| AT3G18930 | chr3_6523804  | cis   | 0,52±0,1   | 7,16E-08 | 0,29 | RING/U-box-superfamily-protein                                                  |
| AT1G33080 | chr1_11984792 | cis   | 0,64±0,12  | 7,17E-08 | 0,14 | MATE-efflux-family-protein                                                      |
| AT5G25570 | chr5_8901472  | cis   | -0,96±0,18 | 7,18E-08 | 0,09 |                                                                                 |
| AT5G42770 | chr5_11410551 | trans | 0,72±0,13  | 7,19E-08 | 0,11 | Maf-like-protein                                                                |
| AT2G15430 | chr2_6738364  | cis   | 0,61±0,11  | 7,20E-08 | 0,21 | DNA-directed-RNA-polymerase-family-protein                                      |
| AT1G74800 | chr1_28097847 | cis   | 0,49±0,09  | 7,20E-08 | 0,41 | Galactosyltransferase-family-protein                                            |
| AT3G59190 | chr3_4928651  | trans | -0,79±0,15 | 7,21E-08 | 0,11 | F-box/RNI-like-superfamily-protein                                              |
| AT4G37553 | chr4_17645278 | cis   | -0,48±0,09 | 7,21E-08 | 0,42 |                                                                                 |
| AT2G32180 | chr1_8548969  | trans | -0,77±0,14 | 7,22E-08 | 0,09 | plastid-transcriptionally-active-18                                             |
| AT5G62980 | chr3_22382411 | trans | 0,6±0,11   | 7,22E-08 | 0,19 | Dihydroneopterin-aldolase                                                       |
| AT3G06780 | chr5_8362024  | trans | -0,62±0,12 | 7,23E-08 | 0,16 | glycine-rich-protein                                                            |
| AT5G13500 | chr1_17588496 | trans | 0,51±0,1   | 7,28E-08 | 0,28 |                                                                                 |
| AT2G41470 | chr2_17337187 | cis   | -0,89±0,17 | 7,28E-08 | 0,08 |                                                                                 |
| AT1G75220 | chr1_2320563  | trans | 0,48±0,09  | 7,29E-08 | 0,45 | Major-facilitator-superfamily-protein                                           |
| AT3G24200 | chr2_29717    | trans | -0,71±0,13 | 7,31E-08 | 0,11 | FAD/NAD(P)-binding-oxidoreductase-family-protein                                |
| AT3G17650 | chr3_10273905 | trans | -0,61±0,11 | 7,32E-08 | 0,17 | YELLOW-STRIPE-like-5                                                            |
| AT1G62480 | chr1_23128164 | cis   | -0,47±0,09 | 7,35E-08 | 0,42 | Vacuolar-calcium-binding-protein-related                                        |
| AT1G17145 | chr5_20067627 | trans | -0,67±0,13 | 7,38E-08 | 0,14 | RING/U-box-superfamily-protein                                                  |
| AT2G45510 | chr1_14941234 | trans | 0,9±0,17   | 7,38E-08 | 0,06 | cytochrome-P450,-family-704,-subfamily-A,-polypeptide-2                         |
| AT5G23330 | chr3_12094818 | trans | 0,73±0,14  | 7,39E-08 | 0,10 | Nucleotidylyl-transferase-superfamily-protein                                   |
| AT5G02560 | chr5_577807   | cis   | 0,59±0,11  | 7,41E-08 | 0,19 | histone-H2A-12                                                                  |
| AT5G60335 | chr5_24274906 | cis   | -0,46±0,09 | 7,43E-08 | 0,43 | Thioesterase-superfamily-protein                                                |
| AT1G77140 | chr4_6758588  | trans | -0,52±0,1  | 7,47E-08 | 0,27 | vacuolar-protein-sorting-45                                                     |
| AT1G51630 | chr1_19152171 | cis   | 0,52±0,1   | 7,51E-08 | 0,29 | O-fucosyltransferase-family-protein                                             |
| AT3G17820 | chr3_6156010  | trans | -0,74±0,14 | 7,52E-08 | 0,11 | glutamine-synthetase-1.3                                                        |
| AT2G44270 | chr2_18268606 | cis   | -0,56±0,1  | 7,54E-08 | 0,26 | repressor-of-lrx1                                                               |

|           |               |       |            |          |      |                                                                                         |
|-----------|---------------|-------|------------|----------|------|-----------------------------------------------------------------------------------------|
| AT5G65000 | chr5_25973993 | cis   | -0,64±0,12 | 7,62E-08 | 0,16 | Nucleotide-sugar-transporter-family-protein                                             |
| AT5G47680 | chr5_19354016 | cis   | -0,48±0,09 | 7,62E-08 | 0,46 |                                                                                         |
| AT2G38070 | chr2_15928646 | cis   | -0,84±0,16 | 7,64E-08 | 0,08 | Protein-of-unknown-function-(DUF740)                                                    |
| AT2G29020 | chr2_12469946 | cis   | -0,47±0,09 | 7,65E-08 | 0,46 | Rab5-interacting-family-protein                                                         |
| AT1G72140 | chr1_27141526 | cis   | 0,53±0,1   | 7,65E-08 | 0,25 | Major-facilitator-superfamily-protein                                                   |
| AT1G65810 | chr1_24481267 | cis   | 0,79±0,15  | 7,65E-08 | 0,09 | P-loop-containing-nucleoside-triphosphate-hydrolases-superfamily-protein                |
| AT4G02230 | chr1_16973461 | trans | -0,61±0,11 | 7,66E-08 | 0,19 | Ribosomal-protein-L19e-family-protein                                                   |
| AT3G11780 | chr5_13542679 | trans | -0,64±0,12 | 7,66E-08 | 0,15 | MD-2-related-lipid-recognition-domain-containing-protein-/-ML-domain-containing-protein |
| AT5G27240 | chr5_9594001  | cis   | 0,66±0,12  | 7,67E-08 | 0,14 | DNAJ-heat-shock-N-terminal-domain-containing-protein                                    |
| AT1G58350 | chr1_21666910 | cis   | 0,5±0,09   | 7,72E-08 | 0,28 | Putative-serine-esterase--family-protein                                                |
| AT2G22140 | chr5_17292018 | trans | 0,7±0,13   | 7,73E-08 | 0,14 | essential-meiotic-endonuclease-1B                                                       |
| AT4G06534 | chr2_19352303 | trans | 0,64±0,12  | 7,76E-08 | 0,14 |                                                                                         |
| AT4G14150 | chr2_11394858 | trans | 0,69±0,13  | 7,77E-08 | 0,12 | phragmoplast-associated-kinesin-related-protein-1                                       |
| AT1G08010 | chr5_13313436 | trans | 0,56±0,1   | 7,80E-08 | 0,21 | GATA-transcription-factor-11                                                            |
| AT4G13560 | chr4_7921402  | cis   | 0,61±0,11  | 7,82E-08 | 0,18 | Late-embryogenesis-abundant-protein-(LEA)-family-protein                                |
| AT4G20410 | chr4_11014210 | cis   | -0,53±0,1  | 7,83E-08 | 0,25 | gamma-soluble-NSF-attachment-protein                                                    |
| AT3G13060 | chr4_7711468  | trans | 0,62±0,11  | 7,84E-08 | 0,17 | evolutionarily-conserved-C-terminal-region-5                                            |
| AT5G45430 | chr5_18425889 | cis   | -0,52±0,1  | 7,85E-08 | 0,31 | Protein-kinase-superfamily-protein                                                      |
| AT1G20120 | chr1_7147321  | trans | -0,57±0,11 | 7,86E-08 | 0,20 | GDSL-like-Lipase/Acylhydrolase-superfamily-protein                                      |
| AT5G38710 | chr5_15624451 | trans | 0,73±0,14  | 7,88E-08 | 0,11 | Methylenetetrahydrofolate-reductase-family-protein                                      |
| AT2G43535 | chr1_22581233 | trans | 0,49±0,09  | 7,89E-08 | 0,31 | Scorpion-toxin-like-knottin-superfamily-protein                                         |
| AT1G22380 | chr2_15597312 | trans | 0,58±0,11  | 7,92E-08 | 0,19 | UDP-glucosyl-transferase-85A3                                                           |
| AT5G03450 | chr5_863684   | cis   | 0,71±0,13  | 7,92E-08 | 0,11 | Transducin/WD40-repeat-like-superfamily-protein                                         |
| AT1G14680 | chr1_5040765  | cis   | 0,49±0,09  | 7,92E-08 | 0,35 |                                                                                         |
| AT3G07050 | chr3_2224259  | cis   | 0,56±0,1   | 7,95E-08 | 0,29 | GTP-binding-family-protein                                                              |
| AT4G14500 | chr3_7012334  | trans | 0,66±0,12  | 7,98E-08 | 0,14 | Polyketide-cyclase/dehydrase-and-lipid-transport-superfamily-protein                    |
| AT1G79640 | chr2_16846203 | trans | -0,73±0,14 | 7,99E-08 | 0,10 | Protein-kinase-superfamily-protein                                                      |
| AT3G56030 | chr3_20791163 | cis   | -0,9±0,17  | 7,99E-08 | 0,07 | Tetratricopeptide-repeat-(TPR)-like-superfamily-protein                                 |
| AT5G23660 | chr4_180885   | trans | 0,74±0,14  | 8,03E-08 | 0,11 | homolog-of-Medicago-truncatula-MTN3                                                     |
| AT2G34050 | chr4_18392988 | trans | 0,43±0,08  | 8,03E-08 | 0,40 |                                                                                         |
| AT5G18290 | chr5_6092863  | cis   | 0,56±0,1   | 8,03E-08 | 0,36 | Aquaporin-like-superfamily-protein                                                      |
| AT2G36240 | chr2_15195216 | cis   | -0,64±0,12 | 8,04E-08 | 0,19 | pentatricopeptide-(PPR)-repeat-containing-protein                                       |
| AT1G04430 | chr4_766684   | trans | 0,71±0,13  | 8,08E-08 | 0,11 | S-adenosyl-L-methionine-dependent-methyltransferases-superfamily-protein                |
| AT3G47050 | chr3_17330476 | cis   | 0,48±0,09  | 8,08E-08 | 0,44 | Glycosyl-hydrolase-family-protein                                                       |

|           |               |       |            |          |      |                                                                                 |
|-----------|---------------|-------|------------|----------|------|---------------------------------------------------------------------------------|
| AT1G10095 | chr5_15388675 | trans | 0,58±0,11  | 8,08E-08 | 0,19 | Protein-prenyltransferase-superfamily-protein                                   |
| AT2G29580 | chr2_12646813 | cis   | -0,48±0,09 | 8,12E-08 | 0,40 | CCCH-type-zinc-fingerfamily-protein-with-RNA-binding-domain                     |
| AT4G11320 | chr1_25787334 | trans | -0,6±0,11  | 8,14E-08 | 0,18 | Papain-family-cysteine-protease                                                 |
| AT4G03240 | chr4_1479106  | trans | 0,46±0,09  | 8,14E-08 | 0,42 | frataxin-homolog                                                                |
| AT4G35680 | chr4_687919   | trans | 0,53±0,1   | 8,14E-08 | 0,26 | Arabidopsis-protein-of-unknown-function-(DUF241)                                |
| AT5G01410 | chr3_13292224 | trans | -0,71±0,13 | 8,16E-08 | 0,11 | Aldolase-type-TIM-barrel-family-protein                                         |
| AT2G47630 | chr2_19535380 | cis   | -0,53±0,1  | 8,16E-08 | 0,29 | alpha/beta-Hydrolases-superfamily-protein                                       |
| AT5G20850 | chr1_11531283 | trans | -0,44±0,08 | 8,17E-08 | 0,48 | RAS-associated-with-diabetes-protein-51                                         |
| AT3G55490 | chr1_16965374 | trans | 0,67±0,13  | 8,19E-08 | 0,13 | GINS-complex-protein                                                            |
| AT3G24740 | chr3_10618296 | trans | 0,53±0,1   | 8,22E-08 | 0,25 | Protein-of-unknown-function-(DUF1644)                                           |
| AT5G49990 | chr5_20340531 | cis   | -0,48±0,09 | 8,24E-08 | 0,34 | Xanthine/uracil-permease-family-protein                                         |
| AT5G50680 | chr1_13335389 | trans | -0,47±0,09 | 8,25E-08 | 0,50 | SUMO-activating-enzyme-1B                                                       |
| AT5G15010 | chr5_4858188  | cis   | 0,51±0,09  | 8,25E-08 | 0,45 | Tetratricopeptide-repeat-(TPR)-like-superfamily-protein                         |
| AT4G33220 | chr5_13313436 | trans | 0,57±0,11  | 8,25E-08 | 0,21 | pectin-methylesterase-44                                                        |
| AT3G47833 | chr5_19780435 | trans | 0,46±0,09  | 8,30E-08 | 0,53 |                                                                                 |
| AT5G62310 | chr5_25075437 | trans | 0,96±0,18  | 8,30E-08 | 0,06 | AGC-(cAMP-dependent,-cGMP-dependent-and-protein-kinase-C)-kinase-family-protein |
| AT2G02750 | chr5_17936884 | trans | 0,51±0,1   | 8,33E-08 | 0,69 | Pentatricopeptide-repeat-(PPR)-superfamily-protein                              |
| AT2G42730 | chr2_17790805 | cis   | -0,7±0,13  | 8,37E-08 | 0,14 | F-box-family-protein                                                            |
| AT1G72060 | chr1_27116153 | cis   | 0,52±0,1   | 8,39E-08 | 0,35 | serine-type-endopeptidase-inhibitors                                            |
| AT2G39400 | chr2_16452208 | cis   | -0,58±0,11 | 8,39E-08 | 0,22 | alpha/beta-Hydrolases-superfamily-protein                                       |
| AT3G14170 | chr3_4691463  | cis   | 0,67±0,12  | 8,41E-08 | 0,15 | Plant-protein-of-unknown-function-(DUF936)                                      |
| AT1G73570 | chr1_27650106 | cis   | 0,66±0,12  | 8,42E-08 | 0,15 | HCP-like-superfamily-protein                                                    |
| AT4G31010 | chr2_11326579 | trans | 0,44±0,08  | 8,45E-08 | 0,42 | RNA-binding-CRS1-/-YhbY-(CRM)-domain-containing-protein                         |
| AT3G47810 | chr3_17639369 | cis   | -0,66±0,12 | 8,45E-08 | 0,16 | Calcineurin-like-metallo-phosphoesterase-superfamily-protein                    |
| AT4G23630 | chr4_7755336  | trans | -0,46±0,09 | 8,46E-08 | 0,46 | VIRB2-interacting-protein-1                                                     |
| AT3G28080 | chr3_10453238 | cis   | 0,73±0,14  | 8,47E-08 | 0,12 | nodulin-MtN21-/EamA-like-transporter-family-protein                             |
| AT5G47750 | chr5_19341840 | cis   | -0,44±0,08 | 8,49E-08 | 0,44 | D6-protein-kinase-like-2                                                        |
| AT4G26490 | chr2_16030260 | trans | -0,83±0,15 | 8,50E-08 | 0,07 | Late-embryogenesis-abundant-(LEA)-hydroxyproline-rich-glycoprotein-family       |
| AT5G54650 | chr5_21426099 | NA    | -0,87±0,16 | 8,52E-08 | 0,11 | formin-homology5                                                                |
| AT4G00650 | chr1_16822116 | trans | -0,53±0,1  | 8,53E-08 | 0,26 | FRIGIDA-like-protein                                                            |
| AT1G75880 | chr4_5464467  | trans | -0,5±0,09  | 8,55E-08 | 0,31 | SGNH-hydrolase-type-esterase-superfamily-protein                                |
| AT5G20240 | chr3_12987992 | trans | 0,63±0,12  | 8,56E-08 | 0,15 | K-box-region-and-MADS-box-transcription-factor-family-protein-                  |
| AT2G01870 | chr4_12687112 | trans | 0,47±0,09  | 8,56E-08 | 0,38 |                                                                                 |
| AT1G04900 | chr5_22746815 | trans | 0,56±0,1   | 8,57E-08 | 0,22 | Protein-of-unknown-function-(DUF185)                                            |

|           |               |       |            |          |      |                                                              |
|-----------|---------------|-------|------------|----------|------|--------------------------------------------------------------|
| AT3G09920 | chr3_3014408  | cis   | 0,49±0,09  | 8,59E-08 | 0,48 | phosphatidyl-inositol-monophosphate-5-kinase                 |
| AT3G63510 | chr5_17913612 | trans | 0,46±0,09  | 8,64E-08 | 0,54 | FMN-linked-oxidoreductases-superfamily-protein               |
| AT1G29830 | chr1_10438010 | cis   | -0,46±0,09 | 8,65E-08 | 0,59 | Magnesium-transporter-CorA-like-family-protein               |
| AT3G62290 | chr4_6690528  | trans | -0,44±0,08 | 8,68E-08 | 0,56 | ADP-ribosylation-factor-A1E                                  |
| AT1G01140 | chr1_78272    | cis   | 0,48±0,09  | 8,72E-08 | 0,32 | CBL-interacting-protein-kinase-9                             |
| AT1G70890 | chr1_26726124 | cis   | -0,91±0,17 | 8,72E-08 | 0,07 | MLP-like-protein-43                                          |
| AT4G38020 | chr3_14908489 | trans | -0,71±0,13 | 8,74E-08 | 0,11 | tRNA/rRNA-methyltransferase-(SpoU)-family-protein            |
| AT1G63310 | chr2_13787318 | trans | -0,47±0,09 | 8,74E-08 | 0,48 |                                                              |
| AT3G12965 | chr3_4166759  | cis   | 0,6±0,11   | 8,75E-08 | 0,21 | other-RNA                                                    |
| AT1G18382 | chr4_5665889  | trans | 0,49±0,09  | 8,83E-08 | 0,28 | other-RNA                                                    |
| AT5G66658 | chr5_26833923 | trans | 0,6±0,11   | 8,84E-08 | 0,20 |                                                              |
| AT3G02680 | chr3_582584   | cis   | 0,57±0,11  | 8,85E-08 | 0,19 | nijmegen-breakage-syndrome-1                                 |
| AT5G03340 | chr5_806859   | cis   | -0,57±0,11 | 8,87E-08 | 0,21 | ATPase,-AAA-type,-CDC48-protein                              |
| AT4G01900 | chr5_16334322 | trans | 0,64±0,12  | 8,89E-08 | 0,14 | GLNB1-homolog                                                |
| AT1G50840 | chr1_18839088 | cis   | 0,7±0,13   | 8,89E-08 | 0,11 | polymerase-gamma-2                                           |
| AT3G17280 | chr3_5907053  | cis   | 0,49±0,09  | 8,89E-08 | 0,45 | F-box-and-associated-interaction-domains-containing-protein  |
| AT3G13210 | chr1_12762755 | trans | -0,69±0,13 | 8,93E-08 | 0,12 | crooked-neck-protein,-putative/-cell-cycle-protein,-putative |
| AT1G72960 | chr1_27444543 | cis   | 0,53±0,1   | 8,94E-08 | 0,26 | Root-hair-defective-3-GTP-binding-protein-(RHD3)             |
| AT2G22740 | chr4_18516461 | trans | -0,99±0,19 | 8,95E-08 | 0,06 | SU(VAR)3-9-homolog-6                                         |
| AT5G43950 | chr5_17688733 | cis   | 0,5±0,09   | 8,96E-08 | 0,28 | Plant-protein-of-unknown-function-(DUF946)                   |
| AT3G15020 | chr5_19780435 | trans | 0,46±0,09  | 8,97E-08 | 0,53 | Lactate/malate-dehydrogenase-family-protein                  |
| AT4G21530 | chr4_11450465 | cis   | -0,45±0,09 | 9,00E-08 | 0,45 | Transducin/WD40-repeat-like-superfamily-protein              |
| AT2G30000 | chr2_12804858 | cis   | -0,83±0,16 | 9,02E-08 | 0,07 | PHF5-like-protein                                            |
| AT3G57580 | chr3_21320119 | cis   | -0,68±0,13 | 9,05E-08 | 0,14 | F-box-and-associated-interaction-domains-containing-protein  |
| AT3G48710 | chr3_18039834 | cis   | -0,55±0,1  | 9,06E-08 | 0,26 | DEK-domain-containing-chromatin-associated-protein           |
| AT3G05790 | chr3_1726470  | cis   | -0,48±0,09 | 9,07E-08 | 0,44 | Ion-protease-4                                               |
| AT3G49900 | chr1_19060201 | trans | -0,5±0,09  | 9,09E-08 | 0,29 | Phototropic-responsive-NPH3-family-protein                   |
| AT3G59680 | chr1_28598165 | trans | -0,6±0,11  | 9,09E-08 | 0,17 |                                                              |
| AT1G58410 | chr1_9062115  | trans | -0,46±0,09 | 9,10E-08 | 0,56 | Disease-resistance-protein-(CC-NBS-LRR-class)-family         |
| AT3G57030 | chr1_25096888 | trans | -0,6±0,11  | 9,12E-08 | 0,16 | Calcium-dependent-phosphotriesterase-superfamily-protein     |
| AT4G00290 | chr4_125450   | cis   | 0,48±0,09  | 9,12E-08 | 0,43 | Mechanosensitive-ion-channel-protein                         |
| AT1G29290 | chr1_24056703 | trans | 0,77±0,14  | 9,13E-08 | 0,10 |                                                              |
| AT3G07510 | chr3_2394408  | cis   | -0,46±0,09 | 9,14E-08 | 0,57 |                                                              |
| AT5G67200 | chr1_19060201 | trans | -0,5±0,09  | 9,17E-08 | 0,29 | Leucine-rich-repeat-protein-kinase-family-protein            |



|           |               |       |            |          |      |                                                                                         |
|-----------|---------------|-------|------------|----------|------|-----------------------------------------------------------------------------------------|
| AT4G26310 | chr2_6860880  | trans | 0,48±0,09  | 9,19E-08 | 0,34 | elongation-factor-P-(EF-P)-family-protein                                               |
| AT5G13430 | chr2_4540219  | trans | -0,86±0,16 | 9,19E-08 | 0,06 | Ubiquinol-cytochrome-C-reductase-iron-sulfur-subunit                                    |
| AT2G31725 | chr5_8355621  | trans | -0,6±0,11  | 9,20E-08 | 0,18 | Eukaryotic-protein-of-unknown-function-(DUF842)                                         |
| AT5G47930 | chr5_19422086 | cis   | 0,59±0,11  | 9,20E-08 | 0,22 | Zinc-binding-ribosomal-protein-family-protein                                           |
| AT1G16240 | chr1_5556456  | cis   | -0,48±0,09 | 9,20E-08 | 0,49 | syntaxin-of-plants-51                                                                   |
| AT1G68470 | chr5_633813   | trans | 0,61±0,11  | 9,23E-08 | 0,17 | Exostosin-family-protein                                                                |
| AT1G16550 | chr2_1870568  | trans | -0,83±0,16 | 9,24E-08 | 0,10 |                                                                                         |
| AT5G13690 | chr3_16326916 | trans | -0,48±0,09 | 9,26E-08 | 0,34 | alpha-N-acetylglucosaminidase-family/-NAGLU-family                                      |
| AT5G03720 | chr5_11908724 | trans | 0,85±0,16  | 9,26E-08 | 0,06 | heat-shock-transcription-factor-A3                                                      |
| AT1G11630 | chr3_9122297  | trans | 0,7±0,13   | 9,27E-08 | 0,11 | Tetratricopeptide-repeat-(TPR)-like-superfamily-protein                                 |
| AT1G54660 | chr5_15364544 | trans | -0,49±0,09 | 9,27E-08 | 0,39 |                                                                                         |
| AT3G47295 | chr3_17442953 | cis   | 0,48±0,09  | 9,31E-08 | 0,34 |                                                                                         |
| AT5G24680 | chr5_8460672  | cis   | 0,51±0,1   | 9,32E-08 | 0,36 | Peptidase-C78,-ubiquitin-fold-modifier-specific-peptidase-1/-2                          |
| AT1G34770 | chr1_12746729 | cis   | 0,47±0,09  | 9,34E-08 | 0,35 |                                                                                         |
| AT5G11540 | chr2_11798291 | trans | -0,44±0,08 | 9,35E-08 | 0,59 | D-arabinono-1,4-lactone-oxidase-family-protein                                          |
| AT1G19400 | chr1_6701737  | cis   | -0,54±0,1  | 9,38E-08 | 0,27 | Erythronate-4-phosphate-dehydrogenase-family-protein                                    |
| AT3G51260 | chr1_17022453 | trans | 0,44±0,08  | 9,39E-08 | 0,50 | 20S-proteasome--alpha-subunit-PAD1                                                      |
| AT3G52310 | chr1_16671060 | trans | -0,6±0,11  | 9,40E-08 | 0,18 | ABC-2-type-transporter-family-protein                                                   |
| AT3G05560 | chr3_1632697  | cis   | -0,49±0,09 | 9,41E-08 | 0,38 | Ribosomal-L22e-protein-family                                                           |
| AT2G07140 | chr3_15875158 | trans | 0,48±0,09  | 9,41E-08 | 0,34 | F-box-and-associated-interaction-domains-containing-protein                             |
| AT1G24610 | chr1_8703503  | cis   | -0,84±0,16 | 9,43E-08 | 0,08 | Rubisco-methyltransferase-family-protein                                                |
| AT3G26420 | chr3_9674892  | cis   | -0,49±0,09 | 9,43E-08 | 0,49 | RNA-binding-(RRM/RBD/RNP-motifs)-family-protein-with-retrovirus-zinc-finger-like-domain |
| AT5G28380 | chr5_10348548 | cis   | 0,56±0,1   | 9,46E-08 | 0,18 | Tetratricopeptide-repeat-(TPR)-like-superfamily-protein                                 |
| AT3G52500 | chr5_13313436 | trans | 0,57±0,11  | 9,46E-08 | 0,21 | Eukaryotic-aspartyl-protease-family-protein                                             |
| AT1G64385 | chr1_23900037 | cis   | 0,52±0,1   | 9,47E-08 | 0,34 |                                                                                         |
| AT3G55910 | chr3_20741076 | cis   | -0,54±0,1  | 9,47E-08 | 0,24 |                                                                                         |
| AT5G18255 | chr5_6037590  | cis   | -0,73±0,14 | 9,52E-08 | 0,11 | other-RNA                                                                               |
| AT4G04221 | chr2_12424986 | trans | 0,66±0,12  | 9,54E-08 | 0,12 | other-RNA                                                                               |
| AT5G38690 | chr5_15504983 | cis   | -0,48±0,09 | 9,55E-08 | 0,35 | Zinc-finger-domain-of-monoamine-oxidase-A-repressor-R1-protein                          |
| AT5G66910 | chr5_26720691 | cis   | -0,51±0,1  | 9,55E-08 | 0,39 | Disease-resistance-protein-(CC-NBS-LRR-class)-family                                    |
| AT1G14970 | chr1_5182982  | cis   | 0,61±0,11  | 9,59E-08 | 0,19 | O-fucosyltransferase-family-protein                                                     |
| AT4G37682 | chr4_17824214 | trans | 0,47±0,09  | 9,59E-08 | 0,46 | Protein-of-unknown-function-(DUF1399)                                                   |
| AT3G25290 | chr3_9208737  | cis   | -0,49±0,09 | 9,60E-08 | 0,31 | Auxin-responsive-family-protein                                                         |
| AT2G16390 | chr2_7093811  | cis   | 0,53±0,1   | 9,61E-08 | 0,31 | SNF2-domain-containing-protein/-helicase-domain-containing-protein                      |

|           |               |       |            |          |      |                                                                    |
|-----------|---------------|-------|------------|----------|------|--------------------------------------------------------------------|
| AT5G60490 | chr3_10273905 | trans | -0,59±0,11 | 9,65E-08 | 0,17 | FASCICLIN-like-arabinogalactan-protein-12                          |
| AT3G18145 | chr3_6215458  | cis   | 0,89±0,17  | 9,66E-08 | 0,06 |                                                                    |
| AT5G14080 | chr5_4543368  | cis   | -0,73±0,14 | 9,70E-08 | 0,09 | Tetratricopeptide-repeat-(TPR)-like-superfamily-protein            |
| AT5G40760 | chr4_7668010  | trans | 0,68±0,13  | 9,71E-08 | 0,13 | glucose-6-phosphate-dehydrogenase-6                                |
| AT3G42150 | chr3_14311162 | cis   | -0,57±0,11 | 9,72E-08 | 0,20 |                                                                    |
| AT4G01660 | chr4_708558   | cis   | -0,46±0,09 | 9,72E-08 | 0,42 | ABC-transporter-1                                                  |
| AT3G25700 | chr5_13313436 | trans | 0,57±0,11  | 9,73E-08 | 0,21 | Eukaryotic-aspartyl-protease-family-protein                        |
| AT4G12120 | chr2_3103492  | trans | -0,77±0,14 | 9,76E-08 | 0,09 | Sec1/munc18-like-(SM)-proteins-superfamily                         |
| AT3G06430 | chr5_10045758 | trans | 0,55±0,1   | 9,87E-08 | 0,21 | Tetratricopeptide-repeat-(TPR)-like-superfamily-protein            |
| AT1G67600 | chr5_8316373  | trans | 0,55±0,1   | 9,89E-08 | 0,80 | Acid-phosphatase/vanadium-dependent-haloperoxidase-related-protein |
| AT1G13630 | chr5_18779372 | trans | 0,46±0,09  | 9,95E-08 | 0,40 | Tetratricopeptide-repeat-(TPR)-like-superfamily-protein            |
| AT5G43620 | chr5_17522428 | cis   | 0,48±0,09  | 9,96E-08 | 0,34 | Pre-mRNA-cleavage-complex-II                                       |
| AT2G20560 | chr2_8834265  | cis   | 0,52±0,1   | 1,00E-07 | 0,33 | DNAJ-heat-shock-family-protein                                     |
| AT1G47420 | chr1_17396251 | cis   | -0,58±0,11 | 1,00E-07 | 0,21 | succinate-dehydrogenase-5                                          |
| AT2G27460 | chr5_6821780  | trans | 0,52±0,1   | 1,00E-07 | 0,38 | sec23/sec24-transport-family-protein                               |
| AT2G21420 | chr2_9168970  | cis   | -0,48±0,09 | 1,01E-07 | 0,36 | IBR-domain-containing-protein                                      |
| AT5G52980 | chr5_21454704 | cis   | 0,93±0,17  | 1,01E-07 | 0,06 |                                                                    |
| AT5G15030 | chr5_4869269  | cis   | 0,47±0,09  | 1,01E-07 | 0,51 | Paired-amphipathic-helix-(PAH2)-superfamily-protein                |
| AT4G22756 | chr5_9384664  | trans | 0,75±0,14  | 1,01E-07 | 0,09 | sterol-C4-methyl-oxidase-1-2                                       |
| AT4G31480 | chr4_15266990 | cis   | -0,46±0,09 | 1,01E-07 | 0,37 | Coatomer,-beta-subunit                                             |
| AT5G54960 | chr5_22310442 | NA    | 0,45±0,08  | 1,01E-07 | 0,44 | pyruvate-decarboxylase-2                                           |
| AT1G49850 | chr2_3098610  | trans | -0,49±0,09 | 1,01E-07 | 0,27 | RING/U-box-superfamily-protein                                     |
| AT1G31935 | chr1_11469268 | cis   | -0,51±0,1  | 1,01E-07 | 0,30 | other-RNA                                                          |
| AT2G20420 | chr1_17022453 | trans | 0,47±0,09  | 1,02E-07 | 0,50 | ATP-citrate-lyase-(ACL)-family-protein                             |
| AT1G11730 | chr1_3956855  | cis   | 0,58±0,11  | 1,02E-07 | 0,21 | Galactosyltransferase-family-protein                               |
| AT3G59710 | chr1_18007764 | trans | -0,48±0,09 | 1,02E-07 | 0,35 | NAD(P)-binding-Rossmann-fold-superfamily-protein                   |
| AT5G47570 | chr5_19293407 | cis   | -0,48±0,09 | 1,02E-07 | 0,39 |                                                                    |
| AT1G44920 | chr1_16976331 | cis   | -0,46±0,09 | 1,02E-07 | 0,64 |                                                                    |
| AT2G25560 | chr2_3603231  | trans | -01,±0,19  | 1,02E-07 | 0,06 | DNAJ-heat-shock-N-terminal-domain-containing-protein               |
| AT1G31820 | chr1_11423409 | cis   | 0,88±0,17  | 1,02E-07 | 0,07 | Amino-acid-permease-family-protein                                 |
| AT2G35500 | chr4_5706995  | trans | 0,48±0,09  | 1,02E-07 | 0,44 | shikimate-kinase-like-2                                            |
| AT4G16120 | chr2_1688213  | trans | 0,45±0,09  | 1,02E-07 | 0,51 | COBRA-like-protein-7-precursor                                     |
| AT5G60460 | chr5_24317327 | cis   | -0,53±0,1  | 1,03E-07 | 0,26 | Preprotein-translocase-Sec,-Sec61-beta-subunit-protein             |
| AT4G17390 | chr1_7365759  | trans | 0,45±0,09  | 1,03E-07 | 0,43 | Ribosomal-protein-L23/L15e-family-protein                          |

|           |               |       |            |          |      |                                                     |
|-----------|---------------|-------|------------|----------|------|-----------------------------------------------------|
| AT2G01480 | chr2_215194   | cis   | 0,64±0,12  | 1,03E-07 | 0,17 | O-fucosyltransferase-family-protein                 |
| AT3G49940 | chr1_11421011 | trans | 0,58±0,11  | 1,03E-07 | 0,19 | LOB-domain-containing-protein-38                    |
| AT2G41780 | chr2_17439085 | cis   | -0,47±0,09 | 1,04E-07 | 0,59 |                                                     |
| AT1G09490 | chr1_3067045  | cis   | -0,72±0,14 | 1,04E-07 | 0,12 | NAD(P)-binding-Rossmann-fold-superfamily-protein    |
| AT1G32120 | chr4_7196901  | trans | 0,42±0,08  | 1,04E-07 | 0,54 |                                                     |
| AT1G47056 | chr1_516944   | trans | -0,55±0,1  | 1,05E-07 | 0,24 | VIER-F-box-proteine-1                               |
| AT4G10845 | chr4_6650465  | cis   | -0,6±0,11  | 1,06E-07 | 0,17 |                                                     |
| AT3G30740 | chr3_12361180 | cis   | 0,52±0,1   | 1,06E-07 | 0,24 |                                                     |
| AT1G05135 | chr5_13241678 | trans | 0,51±0,1   | 1,06E-07 | 0,28 |                                                     |
| AT2G36810 | chr2_15439825 | cis   | 0,51±0,1   | 1,06E-07 | 0,30 | ARM-repeat-superfamily-protein                      |
| AT5G39995 | chr5_23834426 | trans | -0,65±0,12 | 1,07E-07 | 0,15 |                                                     |
| AT5G49540 | chr2_1220507  | trans | -0,66±0,13 | 1,07E-07 | 0,14 | Rab5-interacting-family-protein                     |
| AT1G69460 | chr1_26112852 | cis   | -0,47±0,09 | 1,07E-07 | 0,42 | emp24/gp25L/p24-family/GOLD-family-protein          |
| AT3G12780 | chr1_17095651 | trans | -0,71±0,13 | 1,07E-07 | 0,11 | phosphoglycerate-kinase-1                           |
| AT2G27385 | chr2_11707418 | cis   | -0,46±0,09 | 1,07E-07 | 0,38 | Pollen-Ole-e-1-allergen-and-extensin-family-protein |
| ATMG01330 | chr3_4119827  | trans | 0,46±0,09  | 1,07E-07 | 0,56 |                                                     |
| AT2G23290 | chr3_21497245 | trans | -0,72±0,14 | 1,07E-07 | 0,11 | myb-domain-protein-70                               |
| AT1G28110 | chr1_9806790  | cis   | 0,53±0,1   | 1,08E-07 | 0,28 | serine-carboxypeptidase-like-45                     |
| AT4G21585 | chr1_13723742 | trans | -0,45±0,09 | 1,08E-07 | 0,46 | endonuclease-4                                      |
| AT2G44180 | chr2_18255185 | cis   | -0,81±0,15 | 1,08E-07 | 0,09 | methionine-aminopeptidase-2A                        |
| AT1G19420 | chr1_6855013  | trans | 0,51±0,1   | 1,08E-07 | 0,51 |                                                     |
| AT2G31560 | chr2_13435705 | cis   | 0,55±0,1   | 1,08E-07 | 0,24 | Protein-of-unknown-function-(DUF1685)               |
| AT4G04950 | chr1_11606838 | trans | 0,6±0,11   | 1,08E-07 | 0,15 | thioredoxin-family-protein                          |
| AT3G07730 | chr3_10618296 | trans | 0,53±0,1   | 1,09E-07 | 0,25 |                                                     |
| AT2G18910 | chr2_8190531  | cis   | -0,63±0,12 | 1,09E-07 | 0,16 | hydroxyproline-rich-glycoprotein-family-protein     |
| AT3G01690 | chr3_258525   | cis   | 0,5±0,09   | 1,09E-07 | 0,38 | alpha/beta-Hydrolases-superfamily-protein           |
| AT4G24530 | chr4_12664107 | cis   | 0,96±0,18  | 1,10E-07 | 0,06 | O-fucosyltransferase-family-protein                 |
| AT2G27420 | chr2_11674816 | trans | -0,51±0,1  | 1,10E-07 | 0,39 | Cysteine-proteinases-superfamily-protein            |
| AT3G27580 | chr3_10234350 | cis   | 0,65±0,12  | 1,10E-07 | 0,16 | Protein-kinase-superfamily-protein                  |
| AT1G27620 | chr1_9608120  | cis   | 0,54±0,1   | 1,10E-07 | 0,23 | HXXXD-type-acyl-transferase-family-protein          |
| AT1G28410 | chr1_9989731  | cis   | 0,47±0,09  | 1,10E-07 | 0,41 |                                                     |
| AT1G12700 | chr1_4310313  | cis   | -0,6±0,11  | 1,10E-07 | 0,29 | ATP-binding;nucleic-acid-binding;helicases          |
| AT5G15140 | chr5_4909111  | cis   | -0,45±0,09 | 1,11E-07 | 0,57 | Galactose-mutarotase-like-superfamily-protein       |
| AT4G01595 | chr1_19974260 | trans | 0,49±0,09  | 1,11E-07 | 0,31 | Protein-kinase-superfamily-protein                  |

|           |               |       |            |          |      |                                                                                                                   |
|-----------|---------------|-------|------------|----------|------|-------------------------------------------------------------------------------------------------------------------|
| AT5G07880 | chr5_2525053  | cis   | 0,46±0,09  | 1,11E-07 | 0,51 | synaptosomal-associated-protein-SNAP25-like-29                                                                    |
| AT1G52000 | chr1_19336176 | cis   | -0,49±0,09 | 1,11E-07 | 0,39 | Mannose-binding-lectin-superfamily-protein                                                                        |
| AT4G19040 | chr4_10430162 | cis   | 0,48±0,09  | 1,11E-07 | 0,34 | ENHANCED-DISEASE-RESISTANCE-2                                                                                     |
| AT1G11070 | chr1_3699590  | cis   | 0,51±0,1   | 1,12E-07 | 0,33 |                                                                                                                   |
| AT1G61380 | chr1_21928292 | trans | 0,62±0,12  | 1,12E-07 | 0,16 | S-domain-1-29                                                                                                     |
| AT3G61260 | chr1_16626320 | trans | 0,75±0,14  | 1,12E-07 | 0,10 | Remorin-family-protein                                                                                            |
| AT5G35360 | chr2_3110136  | trans | -0,72±0,13 | 1,13E-07 | 0,11 | acetyl-Co-enzyme-a-carboxylase-biotin-carboxylase-subunit                                                         |
| AT1G68600 | chr5_21397497 | trans | -0,69±0,13 | 1,13E-07 | 0,15 | Aluminium-activated-malate-transporter-family-protein                                                             |
| AT5G50010 | chr5_17652059 | trans | -0,63±0,12 | 1,13E-07 | 0,15 | sequence-specific-DNA-binding-transcription-factors;transcription-regulators                                      |
| AT4G28450 | chr4_14061957 | cis   | 0,96±0,18  | 1,13E-07 | 0,06 | nucleotide-binding;protein-binding                                                                                |
| AT2G38695 | chr2_16160135 | cis   | -0,65±0,12 | 1,14E-07 | 0,15 |                                                                                                                   |
| AT4G27820 | chr4_13859640 | cis   | 0,76±0,14  | 1,14E-07 | 0,10 | beta-glucosidase-9                                                                                                |
| AT3G59360 | chr5_593516   | trans | 0,49±0,09  | 1,14E-07 | 0,34 | UDP-galactose-transporter-6                                                                                       |
| AT3G06010 | chr5_9427561  | trans | -0,48±0,09 | 1,14E-07 | 0,36 | Homeotic-gene-regulator                                                                                           |
| AT4G16765 | chr4_9443280  | cis   | 0,96±0,18  | 1,15E-07 | 0,06 | 2-oxoglutarate-(2OG)-and-Fe(II)-dependent-oxygenase-superfamily-protein                                           |
| AT1G53780 | chr1_20080144 | cis   | 0,54±0,1   | 1,15E-07 | 0,26 | peptidyl-prolyl-cis-trans-isomerases;hydrolases;nucleoside-triphosphatases;ATP-binding;nucleotide-binding;ATPases |
| AT1G26940 | chr1_9340882  | cis   | 0,47±0,09  | 1,15E-07 | 0,45 | Cyclophilin-like-peptidyl-prolyl-cis-trans-isomerase-family-protein                                               |
| AT4G27070 | chr4_4400300  | trans | 0,66±0,12  | 1,15E-07 | 0,14 | tryptophan-synthase-beta-subunit-2                                                                                |
| AT3G05420 | chr1_11139970 | trans | -0,44±0,08 | 1,15E-07 | 0,37 | acyl-CoA-binding-protein-4                                                                                        |
| AT1G64360 | chr1_23888299 | cis   | -0,48±0,09 | 1,15E-07 | 0,32 |                                                                                                                   |
| AT3G44380 | chr3_11081145 | trans | -0,45±0,09 | 1,16E-07 | 0,48 | Late-embryogenesis-abundant-(LEA)-hydroxyproline-rich-glycoprotein-family                                         |
| AT5G19830 | chr5_6702507  | cis   | 0,87±0,16  | 1,16E-07 | 0,07 | Peptidyl-tRNA-hydrolase-family-protein                                                                            |
| AT4G09510 | chr4_6023926  | cis   | 0,77±0,15  | 1,16E-07 | 0,10 | cytosolic-invertase-2                                                                                             |
| AT1G16330 | chr4_9168761  | trans | 0,48±0,09  | 1,16E-07 | 0,33 | cyclin-b3;1                                                                                                       |
| AT3G12230 | chr2_8797313  | trans | -0,58±0,11 | 1,16E-07 | 0,19 | serine-carboxypeptidase-like-14                                                                                   |
| AT1G53580 | chr1_19989116 | cis   | -0,76±0,14 | 1,16E-07 | 0,11 | glyoxalase-II--3                                                                                                  |
| AT3G19570 | chr5_25494317 | trans | 0,67±0,13  | 1,17E-07 | 0,12 | Family-of-unknown-function-(DUF566)-                                                                              |
| AT2G31320 | chr2_13359519 | cis   | -0,72±0,14 | 1,18E-07 | 0,12 | poly(ADP-ribose)-polymerase-2                                                                                     |
| AT1G17470 | chr5_15951787 | trans | 0,46±0,09  | 1,18E-07 | 0,39 | developmentally-regulated-G-protein-1                                                                             |
| AT1G16960 | chr1_5143991  | trans | -0,49±0,09 | 1,18E-07 | 0,35 | Ubiquitin-domain-containing-protein                                                                               |
| AT5G18040 | chr5_5952479  | cis   | 0,52±0,1   | 1,19E-07 | 0,24 |                                                                                                                   |
| AT1G50180 | chr1_18466810 | trans | -0,74±0,14 | 1,19E-07 | 0,10 | NB-ARC-domain-containing-disease-resistance-protein                                                               |
| AT1G52570 | chr1_19587948 | cis   | 0,46±0,09  | 1,19E-07 | 0,37 | phospholipase-D-alpha-2                                                                                           |
| AT3G13570 | chr3_11081145 | trans | -0,46±0,09 | 1,19E-07 | 0,48 | SC35-like-splicing-factor-30A                                                                                     |

|           |               |       |            |          |      |                                                                                                                |
|-----------|---------------|-------|------------|----------|------|----------------------------------------------------------------------------------------------------------------|
| AT1G55100 | chr1_5098226  | trans | -0,46±0,09 | 1,19E-07 | 0,35 | transposable-element-gene                                                                                      |
| AT3G21755 | chr3_7666792  | cis   | -0,81±0,15 | 1,19E-07 | 0,08 | other-RNA                                                                                                      |
| AT3G24615 | chr1_22974129 | trans | 0,84±0,16  | 1,20E-07 | 0,06 | snoRNA                                                                                                         |
| AT3G44280 | chr1_2399042  | trans | -0,69±0,13 | 1,20E-07 | 0,12 |                                                                                                                |
| AT3G50880 | chr1_5929751  | trans | 0,56±0,1   | 1,21E-07 | 0,21 | DNA-glycosylase-superfamily-protein                                                                            |
| AT2G34240 | chr2_8300520  | trans | 0,84±0,16  | 1,21E-07 | 0,08 | Protein-with-domains-of-unknown-function-DUF627-and-DUF632                                                     |
| AT5G11140 | chr4_7752692  | trans | -0,45±0,08 | 1,21E-07 | 0,44 | Arabidopsis-phospholipase-like-protein-(PEARLI-4)-family                                                       |
| AT3G12460 | chr3_3955504  | cis   | -0,73±0,14 | 1,21E-07 | 0,11 | Polynucleotidyl-transferase,-ribonuclease-H-like-superfamily-protein                                           |
| AT3G54180 | chr5_22816629 | trans | -0,84±0,16 | 1,21E-07 | 0,08 | cyclin-dependent-kinase-B1;1                                                                                   |
| AT5G17420 | chr1_29311910 | trans | -0,47±0,09 | 1,22E-07 | 0,37 | Cellulose-synthase-family-protein                                                                              |
| AT1G12390 | chr2_15955410 | trans | -0,45±0,09 | 1,22E-07 | 0,55 | Cornichon-family-protein                                                                                       |
| AT2G04390 | chr2_7255221  | trans | -0,46±0,09 | 1,22E-07 | 0,39 | Ribosomal-S17-family-protein                                                                                   |
| AT3G14020 | chr3_4644022  | cis   | -0,47±0,09 | 1,22E-07 | 0,40 | nuclear-factor-Y,-subunit-A6                                                                                   |
| AT3G47670 | chr1_10708763 | trans | 0,49±0,09  | 1,23E-07 | 0,32 | Plant-invertase/pectin-methylesterase-inhibitor-superfamily-protein                                            |
| AT5G64830 | chr1_15499724 | trans | -0,78±0,15 | 1,23E-07 | 0,09 | programmed-cell-death-2-C-terminal-domain-containing-protein                                                   |
| AT4G39550 | chr3_18516310 | trans | -0,69±0,13 | 1,23E-07 | 0,11 | Galactose-oxidase/kelch-repeat-superfamily-protein                                                             |
| AT2G42270 | chr2_17601926 | cis   | -0,63±0,12 | 1,23E-07 | 0,16 | U5-small-nuclear-ribonucleoprotein-helicase                                                                    |
| AT1G51860 | chr1_19260731 | cis   | -0,69±0,13 | 1,23E-07 | 0,13 | Leucine-rich-repeat-protein-kinase-family-protein                                                              |
| AT1G72800 | chr1_27396416 | cis   | 0,48±0,09  | 1,24E-07 | 0,39 | RNA-binding-(RRM/RBD/RNP-motifs)-family-protein                                                                |
| AT2G22450 | chr4_18256161 | trans | -0,45±0,09 | 1,24E-07 | 0,43 | riboflavin-biosynthesis-protein,-putative                                                                      |
| AT5G12390 | chr5_3837785  | trans | -0,6±0,11  | 1,25E-07 | 0,16 | Tetratricopeptide-repeat-(TPR)-like-superfamily-protein                                                        |
| AT4G36810 | chr1_16671064 | trans | -0,76±0,14 | 1,25E-07 | 0,11 | geranylgeranyl-pyrophosphate-synthase-1                                                                        |
| AT2G15820 | chr2_6888822  | cis   | -0,61±0,12 | 1,25E-07 | 0,16 | endonucleases                                                                                                  |
| AT1G76110 | chr1_28560286 | cis   | -0,48±0,09 | 1,25E-07 | 0,43 | HMG-(high-mobility-group)-box-protein-with-ARID/BRIGHT-DNA-binding-domain                                      |
| AT5G47420 | chr5_19225274 | cis   | 0,84±0,16  | 1,25E-07 | 0,09 | Tryptophan-RNA-binding-attenuator-protein-like                                                                 |
| AT3G57590 | chr5_23153505 | trans | -0,57±0,11 | 1,26E-07 | 0,20 | F-box-and-associated-interaction-domains-containing-protein                                                    |
| AT5G23450 | chr1_23725854 | trans | 0,69±0,13  | 1,26E-07 | 0,11 | long-chain-base-(LCB)-kinase-1                                                                                 |
| AT2G18390 | chr2_7987752  | cis   | -0,47±0,09 | 1,26E-07 | 0,45 | ADP-ribosylation-factor-family-protein                                                                         |
| AT2G26830 | chr2_11419578 | cis   | 0,48±0,09  | 1,26E-07 | 0,36 | Protein-kinase-superfamily-protein                                                                             |
| AT5G44570 | chr3_15766547 | trans | -0,43±0,08 | 1,27E-07 | 0,47 |                                                                                                                |
| AT4G39740 | chr4_18434250 | cis   | -0,73±0,14 | 1,27E-07 | 0,11 | Thioredoxin-superfamily-protein                                                                                |
| AT4G09160 | chr3_10279428 | trans | -0,82±0,16 | 1,27E-07 | 0,08 | SEC14-cytosolic-factor-family-protein/-phosphoglyceride-transfer-family-protein                                |
| AT4G13180 | chr4_7661956  | cis   | 0,44±0,08  | 1,27E-07 | 0,44 | NAD(P)-binding-Rossmann-fold-superfamily-protein                                                               |
| AT5G07810 | chr5_2494833  | cis   | 0,63±0,12  | 1,27E-07 | 0,16 | SNF2-domain-containing-protein/-helicase-domain-containing-protein/-HNH-endonuclease-domain-containing-protein |

|           |               |       |            |          |      |                                                                          |
|-----------|---------------|-------|------------|----------|------|--------------------------------------------------------------------------|
| AT2G16500 | chr2_7146401  | cis   | 0,56±0,11  | 1,27E-07 | 0,21 | arginine-decarboxylase-1                                                 |
| AT5G62220 | chr2_11761927 | trans | -0,59±0,11 | 1,27E-07 | 0,18 | glycosyltransferase-18                                                   |
| AT2G04650 | chr5_5926526  | trans | -0,87±0,16 | 1,27E-07 | 0,07 | ADP-glucose-pyrophosphorylase-family-protein                             |
| AT3G56300 | chr3_20874671 | cis   | -0,95±0,18 | 1,27E-07 | 0,06 | CysteinyI-tRNA-synthetase,-class-Ia-family-protein                       |
| AT2G39180 | chr5_19661348 | trans | -0,49±0,09 | 1,27E-07 | 0,29 | CRINKLY4-related-2                                                       |
| AT1G28060 | chr3_11124668 | trans | -0,77±0,15 | 1,28E-07 | 0,10 | Pre-mRNA-splicing-factor-3                                               |
| AT1G78750 | chr2_6495746  | trans | 0,64±0,12  | 1,29E-07 | 0,14 | F-box/RNI-like-superfamily-protein                                       |
| AT3G48730 | chr5_10045758 | trans | 0,54±0,1   | 1,30E-07 | 0,21 | glutamate-1-semialdehyde-2,1-aminomutase-2                               |
| AT3G49640 | chr3_18402861 | cis   | 0,49±0,09  | 1,30E-07 | 0,53 | Aldolase-type-TIM-barrel-family-protein                                  |
| AT5G42450 | chr5_17969122 | trans | 0,47±0,09  | 1,30E-07 | 0,67 | Pentatricopeptide-repeat-(PPR)-superfamily-protein                       |
| AT5G03020 | chr5_9013543  | trans | -0,47±0,09 | 1,30E-07 | 0,49 | Galactose-oxidase/kelch-repeat-superfamily-protein                       |
| AT3G14070 | chr3_4662808  | cis   | -0,55±0,1  | 1,30E-07 | 0,21 | cation-exchanger-9                                                       |
| AT5G48450 | chr4_7684380  | trans | -01,04±0,2 | 1,31E-07 | 0,06 | SKU5--similar-3                                                          |
| AT5G40510 | chr3_18890129 | trans | -0,58±0,11 | 1,31E-07 | 0,21 | Sucrase/ferredoxin-like-family-protein                                   |
| AT3G24200 | chr2_3974783  | trans | -0,91±0,17 | 1,31E-07 | 0,08 | FAD/NAD(P)-binding-oxidoreductase-family-protein                         |
| AT1G13145 | chr3_16129687 | trans | 0,91±0,17  | 1,31E-07 | 0,06 |                                                                          |
| AT5G23150 | chr1_22581176 | trans | -0,57±0,11 | 1,31E-07 | 0,19 | Tudor/PWWP/MBT-domain-containing-protein                                 |
| AT3G46690 | chr3_17199333 | cis   | -0,47±0,09 | 1,31E-07 | 0,37 | UDP-Glycosyltransferase-superfamily-protein                              |
| AT1G33960 | chr1_12349665 | cis   | 0,46±0,09  | 1,31E-07 | 0,56 | P-loop-containing-nucleoside-triphosphate-hydrolases-superfamily-protein |
| AT2G47600 | chr2_19529195 | cis   | -0,53±0,1  | 1,31E-07 | 0,32 | magnesium/proton-exchanger                                               |
| AT1G47530 | chr1_17454430 | cis   | 0,5±0,1    | 1,31E-07 | 0,26 | MATE-efflux-family-protein                                               |
| AT5G48040 | chr5_19471168 | cis   | -0,51±0,1  | 1,32E-07 | 0,36 | Ubiquitin-carboxyl-terminal-hydrolase-family-protein                     |
| AT2G22122 | chr2_9405329  | cis   | -0,47±0,09 | 1,32E-07 | 0,35 |                                                                          |
| AT1G75370 | chr1_22705764 | trans | 0,54±0,1   | 1,32E-07 | 0,21 | Sec14p-like-phosphatidylinositol-transfer-family-protein                 |
| AT4G34620 | chr1_29284466 | trans | -0,49±0,09 | 1,32E-07 | 0,28 | small-subunit-ribosomal-protein-16                                       |
| AT1G77680 | chr1_516944   | trans | -0,55±0,1  | 1,32E-07 | 0,24 | Ribonuclease-II/R-family-protein                                         |
| AT5G06660 | chr3_10089517 | trans | -0,66±0,12 | 1,32E-07 | 0,14 | Protein-of-unknown-function-DUF106,-transmembrane                        |
| AT1G49780 | chr2_5693939  | trans | -0,61±0,11 | 1,33E-07 | 0,20 | plant-U-box-26                                                           |
| AT5G48730 | chr1_9233315  | trans | -0,68±0,13 | 1,33E-07 | 0,14 | Pentatricopeptide-repeat-(PPR)-superfamily-protein                       |
| AT4G31420 | chr4_10164510 | trans | 0,6±0,11   | 1,33E-07 | 0,16 | Zinc-finger-protein-622                                                  |
| AT5G62740 | chr2_16145887 | trans | 0,79±0,15  | 1,33E-07 | 0,09 | SPFH/Band-7/PHB-domain-containing-membrane-associated-protein-family     |
| AT3G18215 | chr1_24056703 | trans | -0,77±0,15 | 1,33E-07 | 0,10 | Protein-of-unknown-function,-DUF599                                      |
| AT5G17150 | chr5_5641884  | cis   | 0,47±0,09  | 1,33E-07 | 0,36 | Cystatin/monellin-superfamily-protein                                    |
| AT5G46740 | chr1_29648907 | trans | -0,51±0,1  | 1,34E-07 | 0,36 | ubiquitin-specific-protease-21                                           |

|           |               |       |            |          |      |                                                                      |
|-----------|---------------|-------|------------|----------|------|----------------------------------------------------------------------|
| AT2G04530 | chr3_16228923 | trans | 0,56±0,11  | 1,34E-07 | 0,20 | Metallo-hydrolase/oxidoreductase-superfamily-protein                 |
| AT3G45730 | chr4_14861925 | trans | -0,49±0,09 | 1,34E-07 | 0,28 |                                                                      |
| AT1G70518 | chr1_26583389 | cis   | -0,82±0,16 | 1,34E-07 | 0,09 |                                                                      |
| AT3G27340 | chr3_10118104 | cis   | 0,46±0,09  | 1,34E-07 | 0,39 |                                                                      |
| AT4G14050 | chr4_8104584  | cis   | -0,48±0,09 | 1,35E-07 | 0,31 | Pentatricopeptide-repeat-(PPR)-superfamily-protein                   |
| AT4G15530 | chr5_7349392  | trans | -0,73±0,14 | 1,35E-07 | 0,11 | pyruvate-orthophosphate-dikinase                                     |
| AT1G34480 | chr1_12607163 | cis   | -0,49±0,09 | 1,36E-07 | 0,29 | Cysteine/Histidine-rich-C1-domain-family-protein                     |
| AT2G27350 | chr4_8855279  | trans | -0,73±0,14 | 1,36E-07 | 0,10 | OTU-like-cysteine-protease-family-protein                            |
| AT5G38610 | chr5_15458592 | cis   | -0,49±0,09 | 1,36E-07 | 0,40 | Plant-invertase/pectin-methylesterase-inhibitor-superfamily-protein  |
| AT1G12460 | chr1_19060201 | trans | -0,5±0,09  | 1,36E-07 | 0,29 | Leucine-rich-repeat-protein-kinase-family-protein                    |
| AT1G22000 | chr1_7746843  | cis   | -0,63±0,12 | 1,37E-07 | 0,15 | FBD,-F-box-and-Leucine-Rich-Repeat-domains-containing-protein        |
| AT1G13820 | chr1_4738415  | cis   | 0,7±0,13   | 1,37E-07 | 0,12 | alpha/beta-Hydrolases-superfamily-protein                            |
| AT5G33210 | chr1_22741687 | trans | -0,68±0,13 | 1,37E-07 | 0,09 | SHI-related-sequence-8                                               |
| AT1G16010 | chr1_5497248  | cis   | 0,58±0,11  | 1,37E-07 | 0,18 | magnesium-transporter-2                                              |
| AT5G27990 | chr2_1847927  | trans | 0,63±0,12  | 1,37E-07 | 0,15 | Pre-rRNA-processing-protein-TSR2,-conserved-region                   |
| AT1G74390 | chr1_27963851 | cis   | 0,86±0,16  | 1,38E-07 | 0,07 | Polynucleotidyl-transferase,-ribonuclease-H-like-superfamily-protein |
| AT3G60200 | chr5_10018614 | trans | 0,49±0,09  | 1,38E-07 | 0,36 |                                                                      |
| AT4G21730 | chr1_12852388 | trans | -0,79±0,15 | 1,38E-07 | 0,09 |                                                                      |
| AT5G08290 | chr5_15481637 | trans | -0,7±0,13  | 1,38E-07 | 0,11 | mRNA-splicing-factor,-thioredoxin-like-U5-snRNP                      |
| AT1G66380 | chr2_9986904  | trans | 0,54±0,1   | 1,38E-07 | 0,21 | myb-domain-protein-114                                               |
| AT5G67230 | chr5_26822334 | cis   | -0,63±0,12 | 1,38E-07 | 0,15 | Nucleotide-diphospho-sugar-transferases-superfamily-protein          |
| AT1G04820 | chr1_1364944  | cis   | -0,48±0,09 | 1,39E-07 | 0,33 | tubulin-alpha-4-chain                                                |
| AT1G17200 | chr5_22110954 | trans | -0,58±0,11 | 1,39E-07 | 0,18 | Uncharacterised-protein-family-(UPF0497)                             |
| AT1G22020 | chr2_3563096  | trans | -0,67±0,13 | 1,39E-07 | 0,16 | serine-hydroxymethyltransferase-6                                    |
| AT2G20790 | chr2_8995610  | cis   | 0,76±0,14  | 1,40E-07 | 0,11 | clathrin-adaptor-complexes-medium-subunit-family-protein             |
| AT5G38590 | chr1_19716111 | trans | -0,45±0,09 | 1,40E-07 | 0,56 | F-box/RNI-like/FBD-like-domains-containing-protein                   |
| AT3G62430 | chr3_23097357 | cis   | -0,84±0,16 | 1,40E-07 | 0,93 | Protein-with-RNI-like/FBD-like-domains                               |
| AT3G48190 | chr1_20829477 | trans | 0,45±0,09  | 1,40E-07 | 0,64 | ataxia-telangiectasia-mutated                                        |
| AT1G71980 | chr2_10851297 | trans | 0,7±0,13   | 1,40E-07 | 0,11 | Protease-associated-(PA)-RING/U-box-zinc-finger-family-protein       |
| AT5G66658 | chr1_13148503 | trans | 0,53±0,1   | 1,41E-07 | 0,23 |                                                                      |
| AT1G27900 | chr1_9705362  | cis   | 0,93±0,18  | 1,41E-07 | 0,06 | RNA-helicase-family-protein                                          |
| AT4G09340 | chr4_5924677  | cis   | 0,96±0,18  | 1,41E-07 | 0,06 | SPla/Ryanodine-receptor-(SPRY)-domain-containing-protein             |
| AT4G23870 | chr2_1115475  | trans | 0,83±0,16  | 1,41E-07 | 0,07 |                                                                      |
| AT1G26300 | chr1_21309404 | trans | -0,76±0,15 | 1,42E-07 | 0,09 | BSD-domain-containing-protein                                        |

|           |               |       |            |          |      |                                                    |
|-----------|---------------|-------|------------|----------|------|----------------------------------------------------|
| AT4G37020 | chr5_6722955  | trans | 0,59±0,11  | 1,42E-07 | 0,16 |                                                    |
| AT2G23330 | chr2_9942448  | cis   | 0,76±0,14  | 1,42E-07 | 0,09 | transposable-element-gene                          |
| AT3G05410 | chr5_20068108 | trans | -0,67±0,13 | 1,42E-07 | 0,13 | Photosystem-II-reaction-center-PsbP-family-protein |
| AT5G40570 | chr4_11421007 | trans | -0,43±0,08 | 1,42E-07 | 0,43 | Surfeit-locus-protein-2-(SURF2)                    |
| AT5G43260 | chr5_17360038 | cis   | -0,7±0,13  | 1,43E-07 | 0,11 | chaperone-protein-dnaJ-related                     |
| AT2G29910 | chr2_19384823 | trans | 0,45±0,09  | 1,43E-07 | 0,52 | F-box/RNI-like-superfamily-protein                 |
| AT3G08740 | chr1_12934923 | trans | 0,55±0,1   | 1,43E-07 | 0,21 | elongation-factor-P-(EF-P)-family-protein          |
| AT4G02040 | chr4_892628   | cis   | 0,46±0,09  | 1,44E-07 | 0,49 |                                                    |
| AT5G42790 | chr3_15887691 | trans | -0,82±0,16 | 1,44E-07 | 0,07 | proteasome-alpha-subunit-F1                        |
| AT5G57190 | chr3_6714518  | trans | -0,52±0,1  | 1,45E-07 | 0,23 | phosphatidylserine-decarboxylase-2                 |

<sup>a</sup>SNP: Top SNP in eQTL; <sup>b</sup>Type: cis/trans (</>1 Mb from peak association to expressed gene); <sup>c</sup>a±SE: Additive effect ± Standard Error; <sup>d</sup>P-value: nominal P-value in expression Genome-Wide Association analysis; <sup>e</sup>MAF: Minor Allele Frequency



**Table S6. 649 cis-eQTL detected in the population of 140 wild-collected *A. thaliana* accessions that were replicated in the population of 107 wild-collected Swedish *A. thaliana* accessions.**

| <i>Locus</i> | <i>a</i> SNP | <i>b</i> Genotype | <i>Schmitz-data</i> |              |                  | <i>Dubin-data</i> |              |                  |
|--------------|--------------|-------------------|---------------------|--------------|------------------|-------------------|--------------|------------------|
|              |              |                   | <i>c</i> a±SE       | <i>d</i> MAF | <i>e</i> P-value | <i>c</i> a±SE     | <i>d</i> MAF | <i>e</i> P-value |
| AT1G01355    | chr1_133794  | A/A               | -0,51±0,09          | 0,14         | 2,24E-09         | -0.36±0.09        | 0,07         | 2,94E-05         |
| AT1G02000    | chr1_346016  | T/T               | -0,52±0,09          | 0,44         | 9,38E-10         | -0.53±0.1         | 0,18         | 6,45E-08         |
| AT1G02050    | chr1_360888  | C/C               | -0,79±0,09          | 0,35         | 1,60E-17         | -0.77±0.11        | 0,30         | 5,43E-12         |
| AT1G02260    | chr1_442418  | T/T               | -0,66±0,09          | 0,08         | 1,14E-13         | -0.62±0.1         | 0,40         | 1,49E-10         |
| AT1G02300    | chr1_454505  | T/T               | -0,35±0,08          | 0,20         | 4,13E-05         | -0.42±0.1         | 0,22         | 1,63E-05         |
| AT1G02770    | chr1_474285  | A/A               | 0,49±0,11           | 0,11         | 6,33E-06         | 0.3±0.1           | 0,31         | 2,72E-03         |
| AT1G02850    | chr1_677970  | A/A               | 0,26±0,09           | 0,09         | 2,18E-03         | 0.46±0.1          | 0,07         | 1,99E-06         |
| AT1G03180    | chr1_794740  | G/G               | 0,42±0,09           | 0,06         | 1,88E-06         | 0.41±0.1          | 0,12         | 2,08E-05         |
| AT1G03230    | chr1_787587  | A/A               | 0,38±0,08           | 0,57         | 6,46E-06         | 0.61±0.1          | 0,22         | 2,86E-10         |
| AT1G03430    | chr1_847854  | A/A               | -0,65±0,11          | 0,11         | 2,50E-09         | -0.61±0.11        | 0,07         | 5,02E-08         |
| AT1G03905    | chr1_993375  | G/G               | 0,8±0,1             | 0,06         | 9,48E-17         | 0.79±0.11         | 0,48         | 1,33E-13         |
| AT1G04090    | chr1_926370  | T/T               | 0,32±0,1            | 0,06         | 1,02E-03         | 0.44±0.1          | 0,37         | 4,45E-06         |
| AT1G04425    | chr1_1193354 | T/T               | 0,59±0,08           | 0,27         | 2,52E-12         | 0.73±0.1          | 0,33         | 2,53E-14         |
| AT1G05550    | chr1_1737628 | T/T               | 0,51±0,12           | 0,46         | 1,97E-05         | 0.52±0.1          | 0,06         | 1,09E-07         |
| AT1G05720    | chr1_1717336 | A/A               | -0,49±0,09          | 0,44         | 2,43E-07         | -0.68±0.12        | 0,40         | 8,48E-09         |
| AT1G05835    | chr1_1762555 | G/G               | -0,44±0,08          | 0,08         | 1,98E-07         | -0.6±0.1          | 0,40         | 1,01E-09         |
| AT1G06640    | chr1_2034485 | G/G               | -0,58±0,14          | 0,17         | 3,90E-05         | -0.92±0.17        | 0,06         | 2,24E-08         |
| AT1G07350    | chr1_2260475 | G/G               | 0,51±0,08           | 0,22         | 1,62E-09         | 0.42±0.1          | 0,30         | 1,59E-05         |
| AT1G07660    | chr1_2378193 | A/A               | 0,79±0,12           | 0,08         | 7,30E-12         | 0.52±0.1          | 0,26         | 6,99E-08         |
| AT1G07780    | chr1_2378193 | A/A               | 0,45±0,12           | 0,06         | 9,11E-05         | 0.51±0.09         | 0,38         | 5,49E-08         |
| AT1G07790    | chr1_2382624 | T/T               | 0,65±0,12           | 0,06         | 2,19E-08         | 0.49±0.1          | 0,26         | 5,37E-07         |
| AT1G09490    | chr1_3075310 | C/C               | -0,39±0,1           | 0,59         | 2,06E-04         | -0.44±0.13        | 0,19         | 4,27E-04         |
| AT1G09500    | chr1_3131332 | C/C               | 0,22±0,1            | 0,16         | 2,27E-02         | 0.67±0.18         | 0,21         | 1,76E-04         |
| AT1G10230    | chr1_3405791 | A/A               | 0,31±0,1            | 0,11         | 1,40E-03         | 0.86±0.19         | 0,48         | 1,08E-05         |
| AT1G10865    | chr1_3616706 | A/A               | -0,52±0,08          | 0,09         | 7,65E-10         | -0.6±0.11         | 0,06         | 7,23E-08         |

|           |              |     |            |      |          |            |      |          |
|-----------|--------------|-----|------------|------|----------|------------|------|----------|
| AT1G11070 | chr1_3693829 | A/A | -0,71±0,13 | 0,12 | 3,15E-08 | -0.27±0.11 | 0,22 | 9,74E-03 |
| AT1G11180 | chr1_3714563 | C/C | 0,34±0,12  | 0,49 | 5,06E-03 | 0.74±0.17  | 0,50 | 8,02E-06 |
| AT1G11240 | chr1_3758989 | A/A | -0,62±0,1  | 0,11 | 1,74E-10 | -0.45±0.1  | 0,08 | 1,22E-05 |
| AT1G11280 | chr1_3772921 | T/T | -0,43±0,08 | 0,11 | 4,71E-07 | -0.48±0.11 | 0,08 | 5,59E-06 |
| AT1G11420 | chr1_3850062 | A/A | -0,68±0,13 | 0,43 | 1,17E-07 | -0.4±0.1   | 0,38 | 2,76E-05 |
| AT1G11800 | chr1_3936486 | T/T | -0,43±0,09 | 0,08 | 3,10E-06 | -0.37±0.1  | 0,16 | 1,68E-04 |
| AT1G11870 | chr1_4002668 | A/A | 0,41±0,08  | 0,60 | 1,33E-06 | 0.45±0.1   | 0,29 | 1,73E-05 |
| AT1G11880 | chr1_4022150 | A/A | -0,42±0,08 | 0,51 | 4,48E-07 | -0.28±0.12 | 0,07 | 1,83E-02 |
| AT1G12200 | chr1_4132980 | G/G | 0,68±0,11  | 0,08 | 1,07E-09 | 0.69±0.1   | 0,21 | 1,61E-12 |
| AT1G12230 | chr1_4149174 | G/G | 0,68±0,13  | 0,15 | 3,05E-07 | 0.82±0.11  | 0,06 | 6,00E-14 |
| AT1G12350 | chr1_4207654 | C/C | 0,67±0,09  | 0,11 | 3,08E-14 | 0.44±0.1   | 0,07 | 4,68E-06 |
| AT1G12530 | chr1_4272302 | G/G | -0,42±0,1  | 0,36 | 1,49E-05 | -0.44±0.1  | 0,07 | 2,64E-05 |
| AT1G12550 | chr1_4273859 | A/A | -0,54±0,08 | 0,08 | 1,93E-10 | -0.73±0.1  | 0,07 | 3,11E-12 |
| AT1G12750 | chr1_4353910 | C/C | -0,48±0,09 | 0,27 | 2,11E-07 | -0.64±0.1  | 0,14 | 9,62E-11 |
| AT1G12790 | chr1_4361418 | G/G | -0,77±0,09 | 0,26 | 3,29E-18 | -0.67±0.1  | 0,29 | 1,28E-11 |
| AT1G13580 | chr1_4640900 | G/G | -0,37±0,09 | 0,21 | 1,25E-05 | -0.6±0.1   | 0,32 | 6,32E-10 |
| AT1G13780 | chr1_4735035 | G/G | 0,78±0,09  | 0,09 | 2,46E-17 | 0.73±0.11  | 0,21 | 3,07E-11 |
| AT1G13820 | chr1_4738415 | G/G | 0,68±0,13  | 0,07 | 1,48E-07 | 0.72±0.15  | 0,31 | 9,77E-07 |
| AT1G14520 | chr1_4972842 | A/A | -0,82±0,17 | 0,17 | 1,85E-06 | -0.67±0.12 | 0,38 | 5,37E-08 |
| AT1G14700 | chr1_5056701 | T/T | -0,77±0,09 | 0,37 | 3,23E-16 | -0.73±0.1  | 0,27 | 1,74E-14 |
| AT1G15280 | chr1_5261771 | C/C | 0,57±0,08  | 0,06 | 1,09E-11 | 0.36±0.11  | 0,07 | 5,69E-04 |
| AT1G16160 | chr1_5305118 | T/T | -0,29±0,08 | 0,07 | 4,81E-04 | -0.27±0.07 | 0,37 | 3,19E-05 |
| AT1G16210 | chr1_5602451 | T/T | -0,53±0,1  | 0,55 | 5,37E-08 | -0.46±0.13 | 0,25 | 3,67E-04 |
| AT1G16340 | chr1_5631781 | G/G | -0,33±0,08 | 0,07 | 7,32E-05 | -0.25±0.1  | 0,36 | 1,50E-02 |
| AT1G16445 | chr1_5632013 | G/G | 0,43±0,09  | 0,15 | 7,34E-07 | 0.33±0.12  | 0,49 | 4,45E-03 |
| AT1G16900 | chr1_6103841 | A/A | 0,71±0,14  | 0,06 | 2,04E-07 | 0.4±0.12   | 0,08 | 4,48E-04 |
| AT1G17240 | chr1_5897950 | G/G | 0,42±0,08  | 0,27 | 4,31E-07 | 0.31±0.08  | 0,37 | 1,39E-04 |
| AT1G17270 | chr1_5918999 | C/C | 0,4±0,09   | 0,48 | 4,65E-06 | 0.54±0.1   | 0,08 | 4,47E-08 |
| AT1G17890 | chr1_6155204 | A/A | 0,48±0,09  | 0,49 | 1,31E-08 | 0.47±0.1   | 0,07 | 1,33E-06 |

|           |               |     |            |      |          |            |      |          |
|-----------|---------------|-----|------------|------|----------|------------|------|----------|
| AT1G18773 | chr1_6473466  | C/C | 0,76±0,1   | 0,10 | 6,20E-14 | 0.68±0.1   | 0,39 | 5,78E-12 |
| AT1G18940 | chr1_6554452  | G/G | 0,66±0,11  | 0,06 | 1,85E-09 | 0.67±0.13  | 0,35 | 1,80E-07 |
| AT1G19400 | chr1_6701737  | T/T | -0,5±0,09  | 0,30 | 1,14E-07 | -0.79±0.1  | 0,10 | 1,02E-15 |
| AT1G20225 | chr1_7012120  | G/G | 0,72±0,1   | 0,55 | 4,59E-12 | 0.52±0.15  | 0,11 | 7,08E-04 |
| AT1G20490 | chr1_7165949  | T/T | -0,47±0,09 | 0,51 | 1,12E-07 | -0.45±0.1  | 0,34 | 2,18E-06 |
| AT1G20620 | chr1_7198841  | T/T | 0,4±0,12   | 0,16 | 8,77E-04 | 0.29±0.1   | 0,44 | 2,46E-03 |
| AT1G20693 | chr1_7177247  | A/A | -0,52±0,09 | 0,41 | 1,33E-08 | -0.25±0.1  | 0,29 | 8,07E-03 |
| AT1G21120 | chr1_7398878  | T/T | -0,42±0,09 | 0,10 | 1,43E-06 | -0.6±0.09  | 0,38 | 2,02E-10 |
| AT1G21210 | chr1_7443462  | G/G | 0,84±0,13  | 0,37 | 8,55E-11 | 0.7±0.1    | 0,08 | 7,75E-13 |
| AT1G22370 | chr1_7901643  | C/C | -0,3±0,09  | 0,24 | 3,57E-04 | -0.41±0.1  | 0,41 | 4,35E-05 |
| AT1G22440 | chr1_7923369  | G/G | 0,52±0,1   | 0,34 | 4,16E-07 | 0.57±0.09  | 0,42 | 2,10E-10 |
| AT1G22650 | chr1_7991470  | T/T | -0,26±0,09 | 0,31 | 4,58E-03 | -0.58±0.1  | 0,21 | 1,45E-08 |
| AT1G23120 | chr1_8203729  | A/A | 0,22±0,09  | 0,11 | 1,48E-02 | 0.44±0.1   | 0,19 | 4,12E-06 |
| AT1G23130 | chr1_8264101  | G/G | -0,26±0,09 | 0,54 | 3,93E-03 | -0.56±0.11 | 0,50 | 1,44E-07 |
| AT1G23140 | chr1_8203853  | C/C | -0,77±0,12 | 0,27 | 1,65E-10 | -0.7±0.11  | 0,15 | 1,36E-10 |
| AT1G23750 | chr1_8402914  | G/G | -0,37±0,09 | 0,38 | 2,11E-05 | -0.4±0.1   | 0,27 | 8,24E-05 |
| AT1G23850 | chr1_8426708  | G/G | -0,74±0,11 | 0,45 | 9,22E-12 | -0.82±0.12 | 0,37 | 4,96E-12 |
| AT1G23970 | chr1_8481515  | A/A | 0,48±0,1   | 0,08 | 5,65E-07 | 0.4±0.1    | 0,39 | 4,11E-05 |
| AT1G24240 | chr1_8588436  | C/C | 0,61±0,09  | 0,08 | 2,19E-12 | 0.67±0.1   | 0,07 | 6,69E-12 |
| AT1G24265 | chr1_8622211  | T/T | 0,53±0,11  | 0,16 | 1,10E-06 | 0.47±0.12  | 0,21 | 4,93E-05 |
| AT1G26200 | chr1_8664505  | G/G | 0,41±0,1   | 0,27 | 6,27E-05 | 0.33±0.12  | 0,28 | 6,05E-03 |
| AT1G26530 | chr1_9200314  | T/T | -0,26±0,09 | 0,51 | 3,29E-03 | -0.66±0.13 | 0,06 | 1,25E-07 |
| AT1G26920 | chr1_9328434  | A/A | 0,47±0,09  | 0,09 | 6,41E-08 | 0.54±0.1   | 0,23 | 1,64E-07 |
| AT1G26940 | chr1_9340882  | C/C | 0,49±0,08  | 0,51 | 7,88E-09 | 0.32±0.1   | 0,06 | 7,32E-04 |
| AT1G27190 | chr1_9439514  | G/G | 0,5±0,09   | 0,24 | 4,71E-09 | 0.4±0.1    | 0,21 | 3,42E-05 |
| AT1G27530 | chr1_9559801  | T/T | -0,46±0,1  | 0,26 | 4,14E-06 | -0.2±0.1   | 0,07 | 4,11E-02 |
| AT1G28620 | chr1_10048508 | C/C | -0,59±0,12 | 0,09 | 3,95E-07 | -0.69±0.12 | 0,28 | 2,37E-09 |
| AT1G28670 | chr1_10077700 | T/T | -0,32±0,14 | 0,43 | 1,97E-02 | -0.65±0.12 | 0,23 | 6,76E-08 |
| AT1G30050 | chr3_18913580 | C/C | -0,38±0,17 | 0,36 | 2,46E-02 | -0.25±0.08 | 0,36 | 1,57E-03 |

|           |               |     |            |      |          |            |      |          |
|-----------|---------------|-----|------------|------|----------|------------|------|----------|
| AT1G30860 | chr1_10985838 | A/A | 0,59±0,1   | 0,09 | 5,29E-09 | 0.45±0.1   | 0,20 | 5,29E-06 |
| AT1G31200 | chr1_11586591 | A/A | -0,36±0,11 | 0,34 | 1,56E-03 | -0.49±0.15 | 0,35 | 1,52E-03 |
| AT1G31600 | chr1_11314334 | T/T | -0,62±0,11 | 0,06 | 5,73E-09 | -0.6±0.1   | 0,31 | 7,41E-10 |
| AT1G31750 | chr1_11292268 | T/T | 0,33±0,1   | 0,36 | 8,99E-04 | 0.28±0.09  | 0,17 | 3,03E-03 |
| AT1G32090 | chr1_11540381 | G/G | 0,46±0,09  | 0,44 | 1,68E-07 | 0.3±0.1    | 0,38 | 3,11E-03 |
| AT1G33080 | chr1_11964044 | G/G | -0,39±0,09 | 0,55 | 2,40E-05 | -0.34±0.1  | 0,07 | 1,10E-03 |
| AT1G33480 | chr1_12150508 | A/A | 0,57±0,11  | 0,21 | 6,43E-07 | 0.54±0.11  | 0,35 | 6,92E-07 |
| AT1G33790 | chr1_12244324 | T/T | 0,39±0,09  | 0,51 | 5,72E-06 | 0.49±0.1   | 0,30 | 2,87E-07 |
| AT1G33990 | chr1_12351037 | G/G | 0,65±0,08  | 0,11 | 1,14E-14 | 0.45±0.1   | 0,23 | 4,62E-06 |
| AT1G34210 | chr1_12459258 | C/C | 0,51±0,09  | 0,09 | 5,89E-09 | 0.4±0.1    | 0,14 | 3,40E-05 |
| AT1G34340 | chr1_12533162 | T/T | 0,78±0,14  | 0,39 | 6,62E-08 | 0.53±0.13  | 0,06 | 2,48E-05 |
| AT1G34480 | chr1_12555439 | G/G | 0,25±0,09  | 0,21 | 9,43E-03 | 0.43±0.1   | 0,35 | 7,75E-06 |
| AT1G34570 | chr1_12656117 | C/C | -0,69±0,11 | 0,14 | 3,67E-10 | -0.65±0.11 | 0,07 | 7,31E-10 |
| AT1G34630 | chr1_12690160 | A/A | -0,51±0,09 | 0,37 | 3,03E-08 | -0.29±0.11 | 0,06 | 9,38E-03 |
| AT1G35230 | chr1_12808695 | G/G | 0,44±0,13  | 0,19 | 9,18E-04 | 0.68±0.16  | 0,42 | 1,13E-05 |
| AT1G35320 | chr1_12957332 | G/G | -0,63±0,1  | 0,31 | 5,40E-10 | -0.4±0.07  | 0,11 | 5,96E-08 |
| AT1G35560 | chr1_13117589 | C/C | -0,5±0,09  | 0,24 | 5,13E-09 | -0.67±0.13 | 0,31 | 9,24E-08 |
| AT1G43245 | chr1_16310196 | A/A | -0,6±0,08  | 0,06 | 7,41E-13 | -0.56±0.1  | 0,10 | 6,43E-09 |
| AT1G43640 | chr1_16441326 | T/T | 0,77±0,1   | 0,20 | 3,33E-14 | 0.72±0.1   | 0,43 | 1,74E-12 |
| AT1G45170 | chr1_17070377 | T/T | 0,31±0,1   | 0,14 | 2,24E-03 | 0.45±0.1   | 0,16 | 2,87E-06 |
| AT1G47420 | chr1_17396376 | T/T | -0,55±0,1  | 0,07 | 1,09E-07 | -0.34±0.12 | 0,46 | 4,55E-03 |
| AT1G47480 | chr1_17418151 | G/G | -0,51±0,09 | 0,85 | 5,34E-08 | -0.4±0.1   | 0,15 | 3,79E-05 |
| AT1G47530 | chr1_17454430 | G/G | 0,52±0,1   | 0,19 | 5,27E-08 | 0.44±0.1   | 0,07 | 1,98E-05 |
| AT1G48380 | chr1_17879580 | A/A | 0,71±0,11  | 0,19 | 3,06E-11 | 0.41±0.1   | 0,13 | 2,25E-05 |
| AT1G48605 | chr1_18011492 | C/C | 0,37±0,09  | 0,09 | 3,77E-05 | 0.36±0.1   | 0,07 | 2,48E-04 |
| AT1G48740 | chr1_18026575 | G/G | 0,46±0,1   | 0,19 | 1,01E-05 | 0.47±0.09  | 0,45 | 3,88E-07 |
| AT1G49630 | chr1_18370101 | G/G | -0,66±0,08 | 0,10 | 5,11E-15 | -0.61±0.1  | 0,37 | 1,04E-09 |
| AT1G49980 | chr1_18507818 | T/T | -0,74±0,09 | 0,27 | 5,46E-17 | -0.71±0.1  | 0,14 | 1,90E-13 |
| AT1G51860 | chr1_19395243 | G/G | -0,58±0,14 | 0,52 | 3,59E-05 | -0.41±0.09 | 0,23 | 8,43E-06 |

|           |               |     |            |      |          |            |      |          |
|-----------|---------------|-----|------------|------|----------|------------|------|----------|
| AT1G52290 | chr1_19459971 | A/A | -0,62±0,12 | 0,44 | 3,10E-07 | -0.6±0.1   | 0,08 | 1,22E-08 |
| AT1G52550 | chr1_19574670 | C/C | 0,74±0,14  | 0,27 | 5,44E-08 | 0.78±0.12  | 0,17 | 1,38E-11 |
| AT1G52590 | chr1_19553810 | A/A | 0,51±0,11  | 0,09 | 7,98E-06 | 0.56±0.13  | 0,28 | 2,08E-05 |
| AT1G52710 | chr1_19414665 | A/A | -0,38±0,1  | 0,49 | 8,93E-05 | -0.35±0.11 | 0,08 | 2,22E-03 |
| AT1G52800 | chr1_19659309 | A/A | -0,58±0,08 | 0,11 | 9,00E-12 | -0.58±0.09 | 0,27 | 7,95E-11 |
| AT1G53080 | chr1_19738403 | C/C | 0,32±0,08  | 0,07 | 1,26E-04 | 0.24±0.09  | 0,17 | 9,05E-03 |
| AT1G53830 | chr1_20100295 | C/C | -0,66±0,09 | 0,25 | 2,83E-14 | -0.51±0.12 | 0,47 | 1,07E-05 |
| AT1G54040 | chr1_20157965 | T/T | -0,8±0,16  | 0,09 | 1,00E-06 | -0.79±0.12 | 0,46 | 1,84E-10 |
| AT1G54050 | chr1_20176520 | A/A | 0,49±0,09  | 0,08 | 8,60E-08 | 0.79±0.11  | 0,21 | 6,19E-12 |
| AT1G54260 | chr1_20588156 | A/A | -0,83±0,18 | 0,09 | 4,49E-06 | -0.4±0.2   | 0,49 | 4,80E-02 |
| AT1G55320 | chr1_20635146 | A/A | -0,54±0,09 | 0,06 | 1,58E-09 | -0.29±0.1  | 0,37 | 3,65E-03 |
| AT1G56120 | chr1_20993126 | G/G | -0,66±0,08 | 0,21 | 3,70E-15 | -0.51±0.1  | 0,29 | 1,29E-07 |
| AT1G56130 | chr1_20985936 | A/A | -0,54±0,08 | 0,08 | 1,92E-10 | -0.4±0.09  | 0,20 | 1,96E-05 |
| AT1G57600 | chr1_21335444 | G/G | 0,63±0,12  | 0,10 | 2,72E-07 | 0.4±0.1    | 0,36 | 2,95E-05 |
| AT1G57770 | chr1_21394855 | C/C | 0,68±0,13  | 0,07 | 6,95E-08 | 0.42±0.1   | 0,28 | 2,13E-05 |
| AT1G58270 | chr1_21614442 | C/C | 0,66±0,09  | 0,36 | 1,36E-14 | 0.78±0.09  | 0,46 | 2,35E-18 |
| AT1G58280 | chr1_21614442 | C/C | 0,65±0,09  | 0,54 | 5,45E-14 | 0.61±0.11  | 0,39 | 8,45E-09 |
| AT1G58300 | chr1_21674226 | C/C | -0,57±0,11 | 0,31 | 4,06E-07 | -0.3±0.09  | 0,13 | 1,12E-03 |
| AT1G59840 | chr1_22029068 | T/T | -0,35±0,09 | 0,24 | 6,54E-05 | -0.51±0.11 | 0,07 | 2,40E-06 |
| AT1G60620 | chr1_22292954 | T/T | -0,27±0,08 | 0,47 | 1,74E-03 | -0.47±0.11 | 0,47 | 9,54E-06 |
| AT1G60630 | chr1_22341984 | C/C | -0,39±0,08 | 0,52 | 3,73E-06 | -0.47±0.1  | 0,46 | 1,08E-06 |
| AT1G60700 | chr1_22359845 | G/G | -0,34±0,09 | 0,09 | 9,47E-05 | -0.42±0.11 | 0,08 | 7,78E-05 |
| AT1G60730 | chr1_22358494 | A/A | 0,49±0,09  | 0,06 | 1,75E-08 | 0.47±0.1   | 0,30 | 3,07E-06 |
| AT1G60740 | chr1_24559034 | A/A | -0,48±0,1  | 0,11 | 7,98E-07 | -0.61±0.11 | 0,06 | 1,50E-08 |
| AT1G61230 | chr1_22577822 | A/A | 0,46±0,09  | 0,37 | 6,90E-08 | 0.37±0.08  | 0,36 | 1,41E-05 |
| AT1G61280 | chr1_22703776 | C/C | -0,41±0,11 | 0,08 | 3,22E-04 | -0.47±0.14 | 0,47 | 1,07E-03 |
| AT1G61380 | chr1_21966164 | C/C | -0,27±0,08 | 0,06 | 1,18E-03 | -0.22±0.1  | 0,40 | 3,22E-02 |
| AT1G61500 | chr1_22686463 | A/A | -0,5±0,09  | 0,06 | 6,18E-09 | -0.4±0.09  | 0,49 | 8,95E-06 |
| AT1G63000 | chr1_23342373 | G/G | 0,41±0,13  | 0,11 | 9,83E-04 | 0.53±0.12  | 0,35 | 6,57E-06 |

|           |               |     |            |      |          |            |      |          |
|-----------|---------------|-----|------------|------|----------|------------|------|----------|
| AT1G63110 | chr1_23408542 | G/G | 0,55±0,14  | 0,06 | 1,60E-04 | 0.42±0.12  | 0,36 | 5,92E-04 |
| AT1G63180 | chr1_23461440 | T/T | -0,2±0,09  | 0,11 | 2,48E-02 | -0.62±0.13 | 0,07 | 2,38E-06 |
| AT1G63855 | chr1_23701054 | G/G | -0,67±0,11 | 0,11 | 1,52E-10 | -0.25±0.1  | 0,07 | 8,63E-03 |
| AT1G63900 | chr1_23718116 | T/T | 0,66±0,1   | 0,43 | 3,18E-12 | 0.43±0.1   | 0,06 | 2,20E-05 |
| AT1G64150 | chr1_23813948 | A/A | 0,63±0,09  | 0,43 | 2,46E-13 | 0.6±0.1    | 0,07 | 2,73E-09 |
| AT1G64355 | chr1_23887201 | G/G | -0,47±0,09 | 0,09 | 1,95E-07 | -0.35±0.1  | 0,37 | 5,26E-04 |
| AT1G64840 | chr1_24090730 | C/C | 0,44±0,1   | 0,08 | 2,11E-05 | 0.39±0.1   | 0,13 | 1,06E-04 |
| AT1G64970 | chr1_24136076 | G/G | 0,5±0,09   | 0,09 | 1,82E-08 | 0.46±0.1   | 0,06 | 1,86E-06 |
| AT1G65080 | chr1_24176717 | T/T | 0,53±0,09  | 0,24 | 4,23E-09 | 0.52±0.1   | 0,39 | 6,46E-08 |
| AT1G65200 | chr1_24223190 | T/T | 0,41±0,09  | 0,11 | 3,90E-06 | 0.43±0.09  | 0,46 | 3,94E-06 |
| AT1G66700 | chr1_24878797 | T/T | -0,62±0,1  | 0,40 | 1,28E-10 | -0.55±0.12 | 0,06 | 2,38E-06 |
| AT1G66860 | chr1_24948678 | T/T | 0,63±0,09  | 0,06 | 1,51E-13 | 0.47±0.09  | 0,28 | 3,17E-08 |
| AT1G66930 | chr1_24948678 | T/T | 0,58±0,09  | 0,24 | 1,05E-11 | 0.11±0.05  | 0,07 | 3,02E-02 |
| AT1G66980 | chr1_24998827 | G/G | 0,45±0,09  | 0,18 | 2,99E-07 | 0.43±0.1   | 0,49 | 1,63E-05 |
| AT1G67460 | chr1_25276982 | G/G | 0,45±0,11  | 0,06 | 8,05E-05 | 0.26±0.07  | 0,38 | 9,15E-05 |
| AT1G69400 | chr1_26088853 | T/T | 0,39±0,08  | 0,33 | 4,35E-06 | 0.39±0.1   | 0,21 | 7,35E-05 |
| AT1G69485 | chr1_26117628 | T/T | -0,56±0,09 | 0,14 | 9,09E-10 | -0.41±0.09 | 0,29 | 1,10E-05 |
| AT1G69540 | chr1_26147776 | A/A | -0,55±0,1  | 0,09 | 3,22E-08 | -0.28±0.12 | 0,23 | 1,91E-02 |
| AT1G70830 | chr1_26742845 | T/T | -0,38±0,1  | 0,12 | 2,12E-04 | -0.3±0.1   | 0,30 | 1,65E-03 |
| AT1G70890 | chr1_26712510 | G/G | 0,21±0,09  | 0,09 | 2,60E-02 | 0.38±0.1   | 0,17 | 2,46E-04 |
| AT1G70985 | chr1_26766444 | A/A | 0,56±0,12  | 0,13 | 3,56E-06 | 0.29±0.09  | 0,06 | 2,43E-03 |
| AT1G72020 | chr1_27109058 | T/T | -0,32±0,09 | 0,08 | 4,88E-04 | -0.34±0.1  | 0,43 | 4,05E-04 |
| AT1G72030 | chr1_27109250 | A/A | 0,41±0,09  | 0,08 | 1,17E-05 | 0.43±0.1   | 0,43 | 9,01E-06 |
| AT1G72130 | chr1_27136812 | G/G | 0,57±0,09  | 0,10 | 1,68E-09 | 0.72±0.13  | 0,15 | 1,16E-08 |
| AT1G72140 | chr1_27171837 | T/T | 0,27±0,08  | 0,22 | 1,53E-03 | 0.36±0.11  | 0,24 | 8,83E-04 |
| AT1G72190 | chr1_27203172 | A/A | -0,31±0,08 | 0,11 | 2,16E-04 | -0.3±0.1   | 0,06 | 3,99E-03 |
| AT1G72800 | chr1_27396038 | G/G | 0,48±0,09  | 0,76 | 3,20E-08 | 0.46±0.11  | 0,50 | 1,24E-05 |
| AT1G73570 | chr1_27648874 | G/G | -0,23±0,08 | 0,09 | 7,18E-03 | -0.37±0.12 | 0,25 | 1,48E-03 |
| AT1G74280 | chr1_27934205 | T/T | 0,48±0,08  | 0,46 | 1,57E-08 | 0.43±0.1   | 0,07 | 6,09E-06 |

|           |               |     |            |      |          |            |      |          |
|-----------|---------------|-----|------------|------|----------|------------|------|----------|
| AT1G74290 | chr1_27934467 | A/A | -0,83±0,14 | 0,06 | 1,08E-09 | -0.51±0.12 | 0,36 | 1,96E-05 |
| AT1G74780 | chr1_28105706 | G/G | -0,64±0,14 | 0,06 | 2,34E-06 | -0.21±0.1  | 0,34 | 3,28E-02 |
| AT1G75560 | chr1_28371780 | T/T | -0,4±0,08  | 0,51 | 2,61E-06 | -0.29±0.1  | 0,10 | 2,41E-03 |
| AT1G76300 | chr1_28639230 | A/A | 0,54±0,13  | 0,27 | 3,79E-05 | 0.45±0.1   | 0,38 | 7,42E-06 |
| AT1G76530 | chr1_28714983 | T/T | 0,43±0,09  | 0,56 | 3,74E-07 | 0.38±0.1   | 0,34 | 1,16E-04 |
| AT1G76850 | chr1_28859683 | G/G | 0,36±0,09  | 0,94 | 3,98E-05 | 0.44±0.1   | 0,11 | 4,78E-06 |
| AT1G77230 | chr1_28965278 | G/G | 0,55±0,08  | 0,06 | 9,09E-11 | 0.23±0.1   | 0,30 | 1,99E-02 |
| AT1G77720 | chr1_29210222 | G/G | 0,81±0,11  | 0,16 | 6,47E-14 | 0.41±0.1   | 0,28 | 3,48E-05 |
| AT1G78450 | chr1_29511437 | A/A | -0,71±0,11 | 0,05 | 1,63E-10 | -0.37±0.1  | 0,37 | 4,31E-04 |
| AT1G78820 | chr1_29638971 | G/G | 0,33±0,09  | 0,11 | 3,23E-04 | 0.37±0.1   | 0,48 | 1,10E-04 |
| AT1G78970 | chr1_29703723 | C/C | 0,57±0,11  | 0,12 | 7,56E-08 | 0.42±0.13  | 0,22 | 1,61E-03 |
| AT1G79529 | chr1_29915978 | G/G | -0,69±0,11 | 0,08 | 1,35E-10 | -0.48±0.1  | 0,26 | 1,84E-06 |
| AT1G80555 | chr1_30287050 | G/G | -0,79±0,09 | 0,54 | 1,66E-19 | -0.73±0.1  | 0,25 | 2,81E-13 |
| AT1G80860 | chr1_30383702 | A/A | -0,43±0,08 | 0,54 | 3,52E-07 | -0.39±0.1  | 0,46 | 5,18E-05 |
| AT2G01090 | chr2_81914    | T/T | 0,52±0,09  | 0,07 | 3,21E-09 | 0.72±0.09  | 0,06 | 3,32E-14 |
| AT2G02240 | chr2_593637   | A/A | 0,33±0,11  | 0,31 | 2,27E-03 | 0.5±0.1    | 0,17 | 1,70E-07 |
| AT2G02590 | chr2_705249   | A/A | 0,65±0,09  | 0,43 | 1,56E-12 | 0.55±0.11  | 0,09 | 2,89E-07 |
| AT2G02770 | chr2_761410   | A/A | 0,42±0,1   | 0,21 | 5,32E-05 | 0.47±0.11  | 0,07 | 9,06E-06 |
| AT2G02960 | chr2_861154   | G/G | -0,19±0,08 | 0,11 | 2,28E-02 | -0.53±0.1  | 0,41 | 1,06E-07 |
| AT2G04170 | chr2_1424281  | A/A | 0,71±0,09  | 0,10 | 2,73E-15 | 0.6±0.1    | 0,17 | 6,11E-10 |
| AT2G04800 | chr2_1688388  | T/T | -0,57±0,12 | 0,06 | 1,17E-06 | -0.44±0.09 | 0,24 | 6,05E-07 |
| AT2G14090 | chr2_5930277  | C/C | 0,52±0,1   | 0,26 | 1,78E-07 | 0.37±0.09  | 0,38 | 4,69E-05 |
| AT2G15042 | chr2_6511737  | T/T | -0,79±0,1  | 0,79 | 7,85E-16 | -0.43±0.08 | 0,14 | 1,72E-08 |
| AT2G15310 | chr2_6655004  | G/G | -0,57±0,08 | 0,15 | 9,22E-12 | -0.39±0.1  | 0,42 | 4,00E-05 |
| AT2G16530 | chr2_7163650  | G/G | -0,78±0,09 | 0,07 | 1,24E-17 | -0.71±0.1  | 0,08 | 2,15E-13 |
| AT2G16595 | chr2_7197748  | A/A | -0,41±0,08 | 0,46 | 1,18E-06 | -0.36±0.1  | 0,07 | 4,30E-04 |
| AT2G17320 | chr2_7549380  | C/C | 0,7±0,11   | 0,44 | 2,83E-11 | 0.55±0.1   | 0,17 | 9,82E-09 |
| AT2G17630 | chr2_7666708  | T/T | 0,51±0,09  | 0,44 | 1,00E-08 | 0.72±0.1   | 0,17 | 2,02E-13 |
| AT2G18100 | chr2_7863028  | A/A | 0,51±0,09  | 0,08 | 1,69E-09 | 0.46±0.11  | 0,47 | 1,72E-05 |

|           |               |     |            |      |          |            |      |          |
|-----------|---------------|-----|------------|------|----------|------------|------|----------|
| AT2G18210 | chr2_7923730  | C/C | -0,73±0,12 | 0,16 | 7,45E-10 | -0.5±0.17  | 0,21 | 3,55E-03 |
| AT2G19240 | chr2_8349464  | G/G | 0,56±0,1   | 0,51 | 6,51E-09 | 0.45±0.09  | 0,32 | 1,27E-06 |
| AT2G19310 | chr2_8372701  | T/T | -0,45±0,13 | 0,08 | 2,99E-04 | -0.8±0.12  | 0,49 | 1,50E-11 |
| AT2G19400 | chr2_8403801  | A/A | -0,73±0,08 | 0,30 | 4,91E-18 | -0.76±0.14 | 0,32 | 4,48E-08 |
| AT2G19910 | chr2_8600731  | A/A | -0,66±0,1  | 0,14 | 1,94E-11 | -0.17±0.08 | 0,07 | 2,32E-02 |
| AT2G21080 | chr2_9036397  | A/A | -0,63±0,11 | 0,13 | 3,95E-09 | -0.79±0.13 | 0,42 | 3,68E-09 |
| AT2G21130 | chr2_9060377  | C/C | 0,52±0,09  | 0,32 | 2,57E-08 | 0.41±0.1   | 0,06 | 3,32E-05 |
| AT2G21830 | chr2_9322464  | G/G | -0,53±0,1  | 0,45 | 3,05E-08 | -0.26±0.11 | 0,21 | 1,92E-02 |
| AT2G21840 | chr2_9323098  | C/C | 0,37±0,08  | 0,17 | 1,38E-05 | 0.4±0.1    | 0,21 | 3,30E-05 |
| AT2G21860 | chr2_9521419  | T/T | -0,43±0,08 | 0,06 | 4,09E-07 | -0.37±0.1  | 0,11 | 2,30E-04 |
| AT2G22905 | chr2_9752751  | A/A | 0,53±0,08  | 0,36 | 2,88E-10 | 0.39±0.09  | 0,38 | 1,75E-05 |
| AT2G22970 | chr2_9774878  | A/A | -0,66±0,1  | 0,18 | 2,48E-11 | -0.51±0.11 | 0,34 | 3,24E-06 |
| AT2G22980 | chr2_9773888  | A/A | -0,57±0,08 | 0,18 | 1,33E-11 | -0.62±0.12 | 0,20 | 5,60E-07 |
| AT2G23620 | chr2_10049585 | T/T | 0,61±0,09  | 0,08 | 4,89E-11 | 0.45±0.1   | 0,43 | 7,32E-06 |
| AT2G24040 | chr2_10224549 | T/T | -0,52±0,09 | 0,10 | 1,71E-09 | -0.37±0.1  | 0,15 | 2,73E-04 |
| AT2G24190 | chr2_10282817 | A/A | -0,5±0,08  | 0,44 | 3,07E-09 | -0.48±0.1  | 0,07 | 1,14E-06 |
| AT2G25220 | chr2_10744960 | C/C | 0,48±0,08  | 0,31 | 1,10E-08 | 0.43±0.1   | 0,22 | 6,49E-06 |
| AT2G25260 | chr2_10758402 | G/G | -0,49±0,08 | 0,31 | 1,02E-08 | -0.41±0.1  | 0,11 | 2,67E-05 |
| AT2G25310 | chr2_10775680 | G/G | 0,55±0,09  | 0,19 | 1,94E-09 | 0.61±0.1   | 0,33 | 3,09E-10 |
| AT2G25355 | chr2_10801269 | T/T | 0,59±0,09  | 0,11 | 7,00E-12 | 0.69±0.11  | 0,30 | 1,21E-09 |
| AT2G25590 | chr2_10892004 | T/T | -0,49±0,09 | 0,07 | 6,60E-08 | -0.39±0.1  | 0,21 | 4,62E-05 |
| AT2G27190 | chr2_11622390 | A/A | -0,63±0,09 | 0,18 | 1,54E-13 | -0.43±0.1  | 0,08 | 8,85E-06 |
| AT2G27360 | chr2_11689092 | G/G | 0,46±0,09  | 0,14 | 4,96E-08 | 0.32±0.1   | 0,07 | 1,17E-03 |
| AT2G27385 | chr2_11707680 | T/T | -0,47±0,09 | 0,36 | 4,95E-07 | -0.27±0.1  | 0,38 | 4,56E-03 |
| AT2G27650 | chr2_11797697 | T/T | -0,53±0,08 | 0,32 | 1,56E-10 | -0.61±0.13 | 0,44 | 3,66E-06 |
| AT2G27960 | chr2_11920870 | G/G | -0,71±0,1  | 0,14 | 4,06E-13 | -0.42±0.1  | 0,29 | 2,77E-05 |
| AT2G28130 | chr2_11993201 | G/G | -0,6±0,12  | 0,11 | 5,89E-07 | -0.54±0.11 | 0,14 | 4,79E-07 |
| AT2G28560 | chr2_12239210 | C/C | 0,97±0,16  | 0,10 | 4,87E-10 | 0.41±0.09  | 0,23 | 1,07E-05 |
| AT2G29160 | chr2_12623091 | G/G | 0,42±0,09  | 0,18 | 5,59E-06 | 0.62±0.13  | 0,26 | 7,29E-07 |



|           |               |     |            |      |          |            |      |          |
|-----------|---------------|-----|------------|------|----------|------------|------|----------|
| AT2G29370 | chr2_12200958 | C/C | -0,31±0,14 | 0,13 | 2,39E-02 | -0.45±0.13 | 0,30 | 4,71E-04 |
| AT2G29440 | chr2_12622677 | T/T | 0,5±0,09   | 0,29 | 7,81E-09 | 0.56±0.1   | 0,32 | 2,81E-08 |
| AT2G29580 | chr2_12646569 | A/A | -0,42±0,09 | 0,47 | 4,79E-06 | -0.44±0.12 | 0,29 | 1,87E-04 |
| AT2G29950 | chr2_12786863 | T/T | -0,34±0,09 | 0,09 | 8,42E-05 | -0.5±0.12  | 0,07 | 2,54E-05 |
| AT2G30230 | chr2_12893401 | T/T | -0,18±0,09 | 0,14 | 3,93E-02 | -0.36±0.1  | 0,16 | 4,47E-04 |
| AT2G30480 | chr2_12986516 | T/T | -0,83±0,1  | 0,06 | 2,54E-17 | -0.59±0.11 | 0,37 | 3,15E-07 |
| AT2G31250 | chr2_13255966 | A/A | -0,45±0,12 | 0,08 | 2,27E-04 | -0.49±0.09 | 0,42 | 2,74E-07 |
| AT2G31560 | chr2_13426709 | C/C | 0,46±0,12  | 0,06 | 1,38E-04 | 0.53±0.1   | 0,26 | 6,47E-08 |
| AT2G32340 | chr2_13732366 | T/T | -0,63±0,09 | 0,06 | 3,26E-12 | -0.46±0.09 | 0,13 | 1,02E-06 |
| AT2G32840 | chr2_13915905 | G/G | 0,5±0,13   | 0,13 | 7,90E-05 | 0.43±0.1   | 0,34 | 6,16E-06 |
| AT2G32940 | chr2_13977350 | A/A | -0,54±0,08 | 0,31 | 1,62E-10 | -0.53±0.1  | 0,20 | 1,66E-07 |
| AT2G33600 | chr2_14484119 | T/T | -0,5±0,14  | 0,10 | 2,72E-04 | -0.48±0.12 | 0,15 | 8,42E-05 |
| AT2G34840 | chr2_14700261 | T/T | -0,94±0,14 | 0,24 | 2,18E-11 | -0.83±0.12 | 0,09 | 7,61E-12 |
| AT2G35060 | chr2_14782595 | T/T | -0,57±0,12 | 0,07 | 8,30E-07 | -0.54±0.1  | 0,20 | 2,01E-08 |
| AT2G35520 | chr2_14920429 | G/G | -0,69±0,09 | 0,08 | 2,04E-15 | -0.51±0.13 | 0,09 | 4,72E-05 |
| AT2G35635 | chr2_14982465 | G/G | -0,53±0,11 | 0,06 | 1,08E-06 | -0.75±0.11 | 0,15 | 9,90E-12 |
| AT2G35690 | chr2_14999577 | A/A | 0,46±0,09  | 0,16 | 4,24E-07 | 0.22±0.1   | 0,42 | 2,46E-02 |
| AT2G35738 | chr2_15026659 | G/G | 0,7±0,12   | 0,06 | 1,57E-09 | 0.49±0.11  | 0,26 | 1,61E-05 |
| AT2G35810 | chr2_15002274 | T/T | -0,46±0,09 | 0,07 | 3,68E-07 | -0.62±0.15 | 0,28 | 4,30E-05 |
| AT2G35830 | chr2_15028694 | A/A | 0,55±0,1   | 0,07 | 1,18E-08 | 0.25±0.12  | 0,32 | 4,07E-02 |
| AT2G36050 | chr2_15138413 | C/C | 0,51±0,08  | 0,47 | 1,87E-09 | 0.33±0.1   | 0,27 | 7,76E-04 |
| AT2G36590 | chr2_15345697 | C/C | -0,71±0,1  | 0,29 | 5,13E-12 | -0.43±0.11 | 0,49 | 1,09E-04 |
| AT2G37370 | chr2_15679172 | T/T | -0,5±0,08  | 0,09 | 3,22E-09 | -0.66±0.1  | 0,07 | 3,50E-11 |
| AT2G38430 | chr2_16056730 | A/A | 0,38±0,09  | 0,22 | 1,36E-05 | 0.45±0.09  | 0,20 | 9,00E-07 |
| AT2G38610 | chr2_16145325 | G/G | -0,46±0,13 | 0,55 | 3,63E-04 | -0.46±0.1  | 0,07 | 7,70E-06 |
| AT2G38720 | chr2_16159606 | G/G | 0,51±0,1   | 0,06 | 1,43E-07 | 0.56±0.12  | 0,29 | 1,64E-06 |
| AT2G38780 | chr2_16205849 | C/C | 0,61±0,08  | 0,09 | 5,34E-13 | 0.42±0.1   | 0,29 | 2,08E-05 |
| AT2G39110 | chr2_16294335 | C/C | 0,41±0,08  | 0,06 | 1,66E-06 | 0.35±0.09  | 0,26 | 1,83E-04 |
| AT2G40570 | chr2_16940810 | G/G | 0,81±0,11  | 0,07 | 1,89E-13 | 0.52±0.12  | 0,10 | 9,76E-06 |

|           |               |     |            |      |          |            |      |          |
|-----------|---------------|-----|------------|------|----------|------------|------|----------|
| AT2G41050 | chr2_17121356 | G/G | -0,33±0,08 | 0,07 | 7,70E-05 | -0.47±0.1  | 0,28 | 9,95E-07 |
| AT2G41160 | chr2_17150460 | G/G | 0,49±0,08  | 0,21 | 5,22E-09 | 0.31±0.1   | 0,19 | 1,78E-03 |
| AT2G41340 | chr2_17243707 | T/T | -0,69±0,14 | 0,07 | 4,17E-07 | -0.52±0.11 | 0,07 | 2,23E-06 |
| AT2G41470 | chr2_17299327 | G/G | 0,36±0,13  | 0,19 | 4,11E-03 | 0.48±0.1   | 0,36 | 6,76E-07 |
| AT2G41650 | chr2_17363240 | C/C | -0,49±0,1  | 0,34 | 9,17E-07 | -0.53±0.1  | 0,28 | 2,85E-08 |
| AT2G41660 | chr2_17381872 | C/C | 0,6±0,11   | 0,11 | 1,85E-08 | 0.52±0.12  | 0,32 | 2,87E-05 |
| AT2G41780 | chr2_17439085 | G/G | -0,51±0,09 | 0,19 | 3,07E-09 | -0.44±0.1  | 0,29 | 5,78E-06 |
| AT2G42240 | chr2_17639893 | G/G | -0,34±0,12 | 0,06 | 5,88E-03 | -0.63±0.19 | 0,22 | 1,21E-03 |
| AT2G43500 | chr2_18060212 | C/C | 0,65±0,1   | 0,07 | 2,73E-11 | 0.6±0.1    | 0,20 | 9,13E-09 |
| AT2G43540 | chr2_18071235 | T/T | -0,67±0,11 | 0,14 | 1,07E-09 | -0.47±0.1  | 0,49 | 4,38E-06 |
| AT2G43720 | chr2_18117794 | G/G | -0,41±0,1  | 0,07 | 2,72E-05 | -0.42±0.1  | 0,42 | 1,71E-05 |
| AT2G43920 | chr2_18173085 | G/G | -0,44±0,09 | 0,21 | 5,08E-07 | -0.55±0.09 | 0,29 | 4,93E-09 |
| AT2G44210 | chr2_18281511 | G/G | 0,82±0,13  | 0,06 | 5,88E-10 | 0.59±0.1   | 0,42 | 1,12E-08 |
| AT2G44290 | chr2_18305617 | A/A | 0,43±0,08  | 0,06 | 3,54E-07 | 0.44±0.1   | 0,21 | 7,45E-06 |
| AT2G44360 | chr2_18321698 | A/A | 0,63±0,08  | 0,06 | 1,06E-13 | 0.48±0.1   | 0,07 | 6,44E-07 |
| AT2G44530 | chr2_18395070 | A/A | -0,38±0,09 | 0,39 | 7,61E-06 | -0.49±0.11 | 0,08 | 8,84E-06 |
| AT2G44690 | chr2_18429206 | G/G | 0,69±0,08  | 0,06 | 3,10E-16 | 0.48±0.1   | 0,16 | 8,57E-07 |
| AT2G45150 | chr2_18613825 | T/T | 0,42±0,09  | 0,59 | 1,87E-06 | 0.61±0.11  | 0,06 | 5,13E-08 |
| AT2G45920 | chr2_18895426 | T/T | -0,63±0,09 | 0,13 | 2,65E-12 | -0.45±0.1  | 0,39 | 2,49E-06 |
| AT2G46450 | chr2_19084290 | G/G | -0,31±0,09 | 0,11 | 6,15E-04 | -0.43±0.1  | 0,06 | 2,61E-05 |
| AT2G46930 | chr2_19304723 | T/T | -0,58±0,18 | 0,43 | 1,45E-03 | -0.33±0.11 | 0,14 | 2,74E-03 |
| AT2G47600 | chr2_19519015 | A/A | 0,48±0,09  | 0,65 | 1,61E-08 | 0.56±0.1   | 0,25 | 5,19E-09 |
| AT2G47630 | chr2_19535380 | T/T | -0,5±0,09  | 0,24 | 1,05E-07 | -0.59±0.1  | 0,18 | 6,77E-10 |
| AT3G01790 | chr3_602512   | A/A | -0,54±0,17 | 0,38 | 1,54E-03 | -0.24±0.11 | 0,10 | 3,55E-02 |
| AT3G02520 | chr3_629989   | A/A | -0,55±0,13 | 0,06 | 1,23E-05 | -0.48±0.1  | 0,31 | 1,67E-06 |
| AT3G02790 | chr3_629989   | A/A | -0,38±0,13 | 0,43 | 2,63E-03 | -0.64±0.1  | 0,23 | 2,06E-10 |
| AT3G02900 | chr3_649418   | C/C | 0,49±0,08  | 0,06 | 4,98E-09 | 0.55±0.1   | 0,33 | 9,24E-09 |
| AT3G03330 | chr3_785985   | G/G | 0,38±0,08  | 0,48 | 5,59E-06 | 0.42±0.1   | 0,22 | 1,24E-05 |
| AT3G04000 | chr3_1037014  | C/C | 0,44±0,09  | 0,07 | 3,05E-07 | 0.43±0.1   | 0,31 | 9,22E-06 |

|           |              |     |            |      |          |            |      |          |
|-----------|--------------|-----|------------|------|----------|------------|------|----------|
| AT3G05140 | chr3_1438382 | T/T | -0,7±0,09  | 0,06 | 8,01E-15 | -0.43±0.09 | 0,07 | 1,39E-06 |
| AT3G05230 | chr3_1484026 | C/C | 0,32±0,09  | 0,41 | 3,51E-04 | 0.38±0.1   | 0,07 | 7,31E-05 |
| AT3G05685 | chr3_1674158 | T/T | 0,98±0,14  | 0,48 | 1,14E-11 | 0.85±0.12  | 0,06 | 1,33E-12 |
| AT3G06110 | chr3_1842274 | A/A | 0,55±0,09  | 0,09 | 6,68E-10 | 0.52±0.1   | 0,08 | 3,72E-07 |
| AT3G06145 | chr3_1861208 | C/C | 0,67±0,09  | 0,32 | 1,23E-14 | 0.66±0.1   | 0,25 | 7,86E-12 |
| AT3G06210 | chr3_1916844 | C/C | 0,59±0,14  | 0,06 | 5,14E-05 | 0.67±0.15  | 0,48 | 5,53E-06 |
| AT3G07200 | chr3_2254013 | A/A | -0,36±0,09 | 0,06 | 3,99E-05 | -0.53±0.1  | 0,11 | 4,13E-08 |
| AT3G07500 | chr3_2392142 | A/A | 0,5±0,08   | 0,06 | 3,63E-09 | 0.43±0.1   | 0,27 | 4,94E-06 |
| AT3G07525 | chr3_2392193 | C/C | -0,63±0,08 | 0,21 | 9,00E-14 | -0.52±0.1  | 0,19 | 5,33E-08 |
| AT3G08920 | chr3_2719090 | C/C | 0,35±0,09  | 0,06 | 7,53E-05 | 0.49±0.1   | 0,32 | 4,35E-07 |
| AT3G08970 | chr3_2742245 | C/C | 0,3±0,09   | 0,08 | 9,02E-04 | 0.51±0.1   | 0,42 | 5,40E-07 |
| AT3G08980 | chr3_2742245 | C/C | 0,52±0,09  | 0,36 | 8,93E-09 | 0.64±0.1   | 0,33 | 3,26E-10 |
| AT3G09480 | chr3_2909694 | G/G | 0,31±0,15  | 0,06 | 3,85E-02 | 0.67±0.13  | 0,09 | 3,23E-07 |
| AT3G09960 | chr3_3061942 | T/T | -0,54±0,1  | 0,06 | 9,14E-08 | -0.28±0.09 | 0,14 | 2,34E-03 |
| AT3G11210 | chr3_3447117 | A/A | -0,39±0,16 | 0,08 | 1,24E-02 | -0.34±0.11 | 0,42 | 1,85E-03 |
| AT3G11220 | chr3_3517660 | C/C | -0,54±0,09 | 0,46 | 2,58E-10 | -0.34±0.1  | 0,37 | 4,30E-04 |
| AT3G11530 | chr3_3628662 | G/G | -0,72±0,12 | 0,16 | 5,32E-09 | -0.59±0.14 | 0,41 | 2,27E-05 |
| AT3G12040 | chr3_3838989 | C/C | -0,58±0,13 | 0,19 | 4,02E-06 | -0.62±0.15 | 0,25 | 1,99E-05 |
| AT3G12460 | chr3_3961828 | A/A | -0,44±0,11 | 0,19 | 9,92E-05 | -0.54±0.13 | 0,08 | 2,08E-05 |
| AT3G12500 | chr3_3958518 | T/T | 0,73±0,13  | 0,51 | 6,58E-09 | 0.79±0.14  | 0,07 | 3,10E-08 |
| AT3G13640 | chr3_4461443 | C/C | 0,61±0,14  | 0,08 | 8,29E-06 | 0.47±0.11  | 0,06 | 9,32E-06 |
| AT3G13845 | chr3_4559312 | A/A | 0,51±0,09  | 0,08 | 4,61E-09 | 0.4±0.1    | 0,06 | 2,98E-05 |
| AT3G14020 | chr3_4644022 | C/C | -0,49±0,09 | 0,16 | 1,17E-08 | -0.42±0.1  | 0,08 | 1,36E-05 |
| AT3G14160 | chr3_4697541 | T/T | -0,48±0,09 | 0,08 | 2,59E-07 | -0.26±0.1  | 0,11 | 8,43E-03 |
| AT3G14172 | chr3_4525271 | A/A | -0,27±0,09 | 0,10 | 2,32E-03 | -0.29±0.1  | 0,32 | 3,50E-03 |
| AT3G14940 | chr3_4988187 | T/T | -0,36±0,08 | 0,92 | 1,51E-05 | -0.46±0.1  | 0,07 | 2,16E-06 |
| AT3G16700 | chr3_5688112 | G/G | 0,73±0,1   | 0,07 | 4,94E-13 | 0.63±0.1   | 0,07 | 1,55E-10 |
| AT3G17280 | chr3_5888492 | C/C | 0,26±0,11  | 0,16 | 1,78E-02 | 0.55±0.12  | 0,09 | 2,04E-06 |
| AT3G17450 | chr3_5953850 | A/A | 0,33±0,1   | 0,12 | 1,72E-03 | 0.37±0.12  | 0,21 | 1,70E-03 |

|           |               |     |            |      |          |            |      |          |
|-----------|---------------|-----|------------|------|----------|------------|------|----------|
| AT3G18070 | chr3_6179175  | A/A | 0,35±0,14  | 0,22 | 1,03E-02 | 0.58±0.17  | 0,41 | 4,24E-04 |
| AT3G18145 | chr3_6243655  | A/A | -0,26±0,11 | 0,42 | 1,76E-02 | -0.77±0.13 | 0,32 | 3,66E-09 |
| AT3G18165 | chr3_6193227  | A/A | -0,48±0,09 | 0,59 | 1,63E-07 | -0.33±0.1  | 0,06 | 7,93E-04 |
| AT3G18485 | chr3_6840933  | A/A | -0,28±0,1  | 0,05 | 5,77E-03 | -0.42±0.11 | 0,06 | 1,07E-04 |
| AT3G18880 | chr3_6513592  | T/T | -0,75±0,14 | 0,53 | 1,55E-07 | -0.39±0.11 | 0,25 | 4,49E-04 |
| AT3G19390 | chr3_6713747  | T/T | 0,42±0,12  | 0,11 | 3,86E-04 | 0.24±0.1   | 0,45 | 1,52E-02 |
| AT3G20130 | chr3_7026006  | G/G | 0,75±0,09  | 0,06 | 4,22E-16 | 0.73±0.11  | 0,14 | 3,27E-11 |
| AT3G20420 | chr3_7119760  | C/C | 0,57±0,1   | 0,06 | 1,30E-08 | 0.36±0.11  | 0,20 | 1,26E-03 |
| AT3G21580 | chr3_7608987  | G/G | -0,82±0,12 | 0,17 | 1,92E-11 | -0.36±0.11 | 0,28 | 1,60E-03 |
| AT3G21690 | chr3_7635436  | A/A | -0,8±0,12  | 0,16 | 3,53E-11 | -0.68±0.13 | 0,13 | 5,44E-07 |
| AT3G22850 | chr3_7946890  | T/T | -0,64±0,13 | 0,07 | 1,11E-06 | -0.43±0.19 | 0,20 | 2,75E-02 |
| AT3G23100 | chr3_8218794  | T/T | 0,44±0,09  | 0,12 | 3,40E-07 | 0.56±0.1   | 0,29 | 1,00E-08 |
| AT3G23260 | chr3_8325788  | T/T | -0,47±0,12 | 0,06 | 8,74E-05 | -0.36±0.11 | 0,40 | 1,83E-03 |
| AT3G23325 | chr3_8341521  | C/C | -0,48±0,1  | 0,10 | 7,67E-07 | -0.53±0.1  | 0,06 | 1,85E-07 |
| AT3G23480 | chr3_8476343  | G/G | 0,42±0,09  | 0,06 | 5,52E-06 | 0.42±0.11  | 0,17 | 6,69E-05 |
| AT3G23560 | chr3_8456654  | G/G | -0,75±0,12 | 0,34 | 8,67E-10 | -0.59±0.13 | 0,45 | 1,31E-05 |
| AT3G24030 | chr3_8346687  | T/T | 0,33±0,11  | 0,10 | 1,76E-03 | 0.33±0.12  | 0,42 | 3,99E-03 |
| AT3G24070 | chr3_8693279  | C/C | -0,62±0,09 | 0,29 | 7,01E-13 | -0.4±0.1   | 0,10 | 7,56E-05 |
| AT3G24255 | chr3_8802794  | T/T | 0,41±0,09  | 0,19 | 7,54E-06 | 0.27±0.09  | 0,21 | 2,70E-03 |
| AT3G25010 | chr3_9110240  | C/C | 0,25±0,11  | 0,14 | 2,40E-02 | 0.45±0.09  | 0,43 | 5,88E-07 |
| AT3G25400 | chr3_9212043  | C/C | 0,42±0,09  | 0,21 | 6,32E-07 | 0.32±0.1   | 0,17 | 8,73E-04 |
| AT3G26165 | chr3_9570707  | G/G | -0,29±0,09 | 0,06 | 6,45E-04 | -0.4±0.1   | 0,06 | 3,07E-05 |
| AT3G26240 | chr3_9629719  | C/C | 0,6±0,1    | 0,09 | 2,75E-09 | 0.4±0.09   | 0,36 | 1,74E-05 |
| AT3G26280 | chr3_9630842  | C/C | -0,46±0,1  | 0,06 | 1,30E-06 | -0.44±0.1  | 0,35 | 5,27E-06 |
| AT3G26922 | chr3_9930640  | A/A | -0,39±0,09 | 0,17 | 1,48E-05 | -0.33±0.1  | 0,07 | 6,93E-04 |
| AT3G27340 | chr3_10045557 | A/A | 0,2±0,08   | 0,37 | 2,00E-02 | 0.48±0.1   | 0,43 | 7,17E-07 |
| AT3G27470 | chr3_10163151 | C/C | 0,44±0,09  | 0,36 | 3,89E-07 | 0.36±0.1   | 0,19 | 2,66E-04 |
| AT3G27930 | chr3_9961973  | G/G | -0,41±0,16 | 0,15 | 1,28E-02 | -0.86±0.21 | 0,12 | 4,00E-05 |
| AT3G28140 | chr3_10472339 | A/A | 0,63±0,1   | 0,10 | 1,72E-10 | 0.54±0.13  | 0,12 | 2,69E-05 |

|           |               |     |            |      |          |            |      |          |
|-----------|---------------|-----|------------|------|----------|------------|------|----------|
| AT3G28880 | chr3_10889704 | C/C | -0,54±0,11 | 0,06 | 5,81E-07 | -0.69±0.15 | 0,47 | 4,99E-06 |
| AT3G29290 | chr3_11245075 | T/T | -0,61±0,11 | 0,12 | 8,37E-09 | -0.39±0.11 | 0,25 | 4,85E-04 |
| AT3G43210 | chr3_15190906 | A/A | -0,8±0,13  | 0,12 | 6,05E-10 | -0.58±0.13 | 0,26 | 3,67E-06 |
| AT3G43600 | chr3_15534068 | A/A | -0,58±0,14 | 0,06 | 4,06E-05 | -0.4±0.1   | 0,12 | 3,94E-05 |
| AT3G44100 | chr3_15869786 | T/T | 0,43±0,09  | 0,24 | 3,73E-07 | 0.34±0.1   | 0,07 | 4,21E-04 |
| AT3G45860 | chr3_16867335 | A/A | -0,76±0,09 | 0,12 | 1,36E-16 | -0.65±0.09 | 0,06 | 1,72E-13 |
| AT3G45890 | chr3_16886045 | A/A | 0,82±0,17  | 0,24 | 1,53E-06 | 0.74±0.13  | 0,16 | 1,59E-08 |
| AT3G46690 | chr3_17199333 | A/A | -0,46±0,09 | 0,09 | 9,61E-08 | -0.43±0.09 | 0,33 | 1,06E-06 |
| AT3G46710 | chr3_17212160 | T/T | 0,73±0,08  | 0,24 | 8,06E-18 | 0.42±0.08  | 0,33 | 9,08E-08 |
| AT3G47010 | chr3_17310993 | C/C | -0,33±0,11 | 0,06 | 2,99E-03 | -0.53±0.12 | 0,10 | 6,26E-06 |
| AT3G47050 | chr3_17330843 | G/G | 0,38±0,1   | 0,24 | 2,51E-04 | 0.35±0.09  | 0,41 | 2,12E-04 |
| AT3G47220 | chr3_17423375 | C/C | -0,45±0,09 | 0,06 | 6,52E-07 | -0.59±0.09 | 0,10 | 7,44E-12 |
| AT3G47730 | chr3_17598837 | G/G | -0,49±0,08 | 0,09 | 7,89E-09 | -0.47±0.1  | 0,35 | 1,82E-06 |
| AT3G48260 | chr3_18362640 | T/T | -0,38±0,09 | 0,09 | 1,74E-05 | -0.24±0.09 | 0,40 | 7,14E-03 |
| AT3G48680 | chr3_18042587 | A/A | -0,55±0,09 | 0,06 | 1,42E-10 | -0.21±0.1  | 0,35 | 2,60E-02 |
| AT3G49340 | chr3_18295338 | G/G | 0,65±0,09  | 0,24 | 4,13E-14 | 0.64±0.09  | 0,28 | 1,35E-12 |
| AT3G49510 | chr3_18365410 | G/G | 0,7±0,14   | 0,36 | 1,35E-06 | 0.5±0.14   | 0,38 | 2,50E-04 |
| AT3G50210 | chr3_18639772 | A/A | -0,44±0,08 | 0,14 | 1,60E-07 | -0.41±0.1  | 0,38 | 2,29E-05 |
| AT3G50845 | chr3_18900203 | A/A | -0,5±0,08  | 0,20 | 3,00E-09 | -0.39±0.1  | 0,49 | 7,31E-05 |
| AT3G53370 | chr3_19772576 | A/A | -0,53±0,09 | 0,66 | 6,18E-10 | -0.4±0.1   | 0,24 | 7,49E-05 |
| AT3G53650 | chr3_19884568 | A/A | -0,42±0,12 | 0,26 | 5,19E-04 | -0.44±0.11 | 0,42 | 3,65E-05 |
| AT3G54160 | chr3_20045512 | G/G | -0,53±0,09 | 0,18 | 5,68E-10 | -0.32±0.09 | 0,35 | 4,65E-04 |
| AT3G54366 | chr3_20157830 | A/A | -0,54±0,09 | 0,11 | 8,14E-09 | -0.3±0.1   | 0,06 | 1,95E-03 |
| AT3G54420 | chr3_20378592 | A/A | -0,51±0,09 | 0,08 | 1,95E-08 | -0.67±0.19 | 0,07 | 6,08E-04 |
| AT3G55170 | chr3_20449055 | G/G | -0,61±0,12 | 0,48 | 1,16E-07 | -0.66±0.1  | 0,07 | 1,92E-11 |
| AT3G55530 | chr3_20593930 | T/T | 0,78±0,13  | 0,15 | 3,12E-09 | 0.51±0.1   | 0,40 | 1,19E-06 |
| AT3G56680 | chr3_20986847 | C/C | -0,53±0,08 | 0,52 | 3,89E-10 | -0.26±0.1  | 0,09 | 7,51E-03 |
| AT3G57460 | chr3_21217502 | C/C | 0,27±0,09  | 0,07 | 3,57E-03 | 0.32±0.09  | 0,07 | 6,98E-04 |
| AT3G57680 | chr3_21400980 | T/T | -0,52±0,1  | 0,39 | 6,56E-08 | -0.44±0.11 | 0,38 | 4,47E-05 |

|           |               |     |            |      |          |            |      |          |
|-----------|---------------|-----|------------|------|----------|------------|------|----------|
| AT3G57990 | chr3_21470658 | T/T | -0,49±0,08 | 0,59 | 6,66E-09 | -0.65±0.1  | 0,08 | 1,02E-11 |
| AT3G58940 | chr3_21783695 | A/A | -0,46±0,1  | 0,14 | 2,01E-06 | -0.44±0.1  | 0,20 | 1,03E-05 |
| AT3G59380 | chr3_21942854 | T/T | 0,36±0,09  | 0,05 | 5,95E-05 | 0.56±0.11  | 0,06 | 2,67E-07 |
| AT3G60150 | chr3_22225185 | C/C | -0,72±0,09 | 0,18 | 2,39E-15 | -0.68±0.08 | 0,44 | 9,06E-17 |
| AT3G60164 | chr3_22225185 | C/C | 0,49±0,09  | 0,41 | 1,03E-07 | 0.39±0.08  | 0,07 | 1,03E-06 |
| AT3G60300 | chr3_22277820 | G/G | -0,49±0,09 | 0,31 | 2,25E-07 | -0.22±0.1  | 0,29 | 2,68E-02 |
| AT3G60480 | chr3_22348322 | C/C | -0,58±0,11 | 0,06 | 4,41E-08 | -0.68±0.1  | 0,21 | 7,20E-12 |
| AT3G60880 | chr3_22476682 | T/T | 0,52±0,12  | 0,51 | 2,19E-05 | 0.34±0.1   | 0,06 | 4,11E-04 |
| AT3G61560 | chr3_22777968 | G/G | -0,61±0,1  | 0,11 | 4,48E-10 | -0.39±0.1  | 0,07 | 7,01E-05 |
| AT3G63480 | chr3_23441032 | A/A | 0,55±0,09  | 0,07 | 8,81E-10 | 0.51±0.12  | 0,36 | 1,73E-05 |
| AT4G00230 | chr4_91149    | A/A | -0,67±0,11 | 0,08 | 1,04E-09 | -0.67±0.13 | 0,43 | 2,88E-07 |
| AT4G00234 | chr4_18776    | G/G | 0,35±0,09  | 0,06 | 3,74E-05 | 0.12±0.06  | 0,06 | 4,82E-02 |
| AT4G00270 | chr4_80055    | T/T | -0,47±0,09 | 0,15 | 5,12E-08 | -0.24±0.1  | 0,13 | 1,44E-02 |
| AT4G00620 | chr4_617140   | A/A | 0,45±0,13  | 0,14 | 2,95E-04 | 0.53±0.17  | 0,21 | 1,20E-03 |
| AT4G00970 | chr4_417205   | T/T | 0,38±0,09  | 0,22 | 9,24E-06 | 0.4±0.1    | 0,16 | 3,51E-05 |
| AT4G01060 | chr4_460817   | T/T | 0,48±0,08  | 0,43 | 1,15E-08 | 0.44±0.1   | 0,08 | 4,06E-06 |
| AT4G01200 | chr4_506690   | C/C | 0,48±0,08  | 0,54 | 1,69E-08 | 0.37±0.1   | 0,36 | 1,80E-04 |
| AT4G01320 | chr4_549347   | A/A | -0,52±0,09 | 0,14 | 4,01E-08 | -0.58±0.1  | 0,20 | 1,39E-08 |
| AT4G01600 | chr4_693045   | T/T | 0,39±0,09  | 0,07 | 5,75E-06 | 0.68±0.1   | 0,47 | 1,54E-12 |
| AT4G01660 | chr4_708594   | A/A | 0,57±0,13  | 0,19 | 6,31E-06 | 0.53±0.12  | 0,13 | 1,05E-05 |
| AT4G01883 | chr4_807179   | A/A | -0,59±0,09 | 0,14 | 1,09E-11 | -0.42±0.1  | 0,30 | 3,16E-05 |
| AT4G02360 | chr4_1380375  | T/T | -0,3±0,08  | 0,23 | 4,32E-04 | -0.34±0.11 | 0,06 | 1,90E-03 |
| AT4G02430 | chr4_1074953  | A/A | -0,6±0,09  | 0,22 | 5,85E-12 | -0.4±0.1   | 0,39 | 2,71E-05 |
| AT4G02660 | chr4_1158571  | C/C | -0,61±0,08 | 0,07 | 4,47E-13 | -0.44±0.1  | 0,45 | 7,29E-06 |
| AT4G02725 | chr4_1210485  | A/A | 0,44±0,09  | 0,20 | 8,16E-07 | 0.43±0.1   | 0,10 | 1,33E-05 |
| AT4G03060 | chr4_1356510  | T/T | -0,74±0,1  | 0,24 | 5,83E-14 | -0.81±0.14 | 0,27 | 4,06E-09 |
| AT4G03230 | chr4_1441524  | C/C | 0,49±0,08  | 0,11 | 4,81E-09 | 0.26±0.09  | 0,26 | 5,05E-03 |
| AT4G04402 | chr4_2151088  | G/G | 0,3±0,11   | 0,38 | 6,07E-03 | 0.67±0.11  | 0,27 | 2,35E-09 |
| AT4G04830 | chr4_2417084  | G/G | -0,28±0,09 | 0,36 | 3,19E-03 | -0.47±0.1  | 0,17 | 1,10E-06 |

|           |              |     |            |      |          |            |      |          |
|-----------|--------------|-----|------------|------|----------|------------|------|----------|
| AT4G05060 | chr4_2564748 | T/T | 0,6±0,09   | 0,34 | 6,35E-11 | 0.25±0.11  | 0,36 | 2,16E-02 |
| AT4G05130 | chr4_2662846 | T/T | -0,55±0,1  | 0,06 | 1,82E-08 | -0.47±0.09 | 0,40 | 1,81E-07 |
| AT4G05390 | chr4_2737877 | T/T | 0,5±0,09   | 0,43 | 5,62E-08 | 0.67±0.1   | 0,16 | 6,53E-12 |
| AT4G08250 | chr4_5196072 | A/A | 0,61±0,09  | 0,57 | 6,08E-13 | 0.41±0.09  | 0,31 | 6,52E-06 |
| AT4G09680 | chr4_6113352 | A/A | 0,69±0,09  | 0,36 | 1,99E-15 | 0.38±0.09  | 0,17 | 3,19E-05 |
| AT4G09750 | chr4_6146859 | T/T | 0,42±0,08  | 0,21 | 4,78E-07 | 0.45±0.1   | 0,37 | 5,93E-06 |
| AT4G09920 | chr4_6228870 | G/G | 0,31±0,09  | 0,06 | 2,64E-04 | 0.23±0.08  | 0,09 | 4,69E-03 |
| AT4G11000 | chr4_6732770 | A/A | -0,63±0,09 | 0,48 | 1,53E-13 | -0.64±0.11 | 0,07 | 1,30E-09 |
| AT4G11410 | chr4_6971346 | A/A | 0,42±0,08  | 0,36 | 6,50E-07 | 0.28±0.11  | 0,06 | 1,02E-02 |
| AT4G11460 | chr4_6964745 | T/T | -0,25±0,08 | 0,23 | 3,39E-03 | -0.48±0.1  | 0,28 | 7,45E-07 |
| AT4G11630 | chr4_7017986 | C/C | -0,63±0,09 | 0,16 | 2,21E-13 | -0.59±0.1  | 0,47 | 3,14E-09 |
| AT4G12110 | chr4_7194682 | G/G | 0,34±0,09  | 0,31 | 8,45E-05 | 0.29±0.1   | 0,40 | 2,41E-03 |
| AT4G12200 | chr4_7281602 | G/G | -0,45±0,08 | 0,06 | 4,80E-08 | -0.24±0.08 | 0,06 | 1,93E-03 |
| AT4G12300 | chr4_7309739 | G/G | 0,42±0,11  | 0,28 | 1,06E-04 | 0.83±0.11  | 0,45 | 7,18E-15 |
| AT4G13150 | chr4_7649860 | T/T | -0,93±0,13 | 0,09 | 2,40E-12 | -0.73±0.11 | 0,12 | 1,34E-10 |
| AT4G13170 | chr4_7649375 | T/T | 0,49±0,09  | 0,30 | 1,44E-08 | 0.43±0.1   | 0,26 | 1,35E-05 |
| AT4G13180 | chr4_7659927 | G/G | 0,61±0,11  | 0,08 | 7,31E-08 | 0.57±0.1   | 0,24 | 1,14E-08 |
| AT4G13630 | chr4_7937622 | A/A | 0,54±0,09  | 0,10 | 5,89E-09 | 0.4±0.1    | 0,35 | 1,08E-04 |
| AT4G13660 | chr4_7944003 | G/G | 0,41±0,11  | 0,12 | 1,61E-04 | 0.5±0.13   | 0,07 | 2,30E-04 |
| AT4G13885 | chr4_8030070 | G/G | 0,46±0,08  | 0,34 | 4,81E-08 | 0.33±0.08  | 0,14 | 6,08E-05 |
| AT4G14030 | chr4_8098585 | C/C | -0,58±0,1  | 0,06 | 3,61E-09 | -0.53±0.12 | 0,49 | 9,40E-06 |
| AT4G14400 | chr4_8300954 | G/G | -0,59±0,09 | 0,31 | 1,79E-11 | -0.32±0.1  | 0,13 | 9,12E-04 |
| AT4G14610 | chr4_8384144 | A/A | -0,43±0,09 | 0,12 | 3,82E-07 | -0.59±0.09 | 0,06 | 2,49E-10 |
| AT4G14970 | chr4_8553355 | A/A | 0,58±0,11  | 0,13 | 9,51E-08 | 0.49±0.11  | 0,12 | 2,93E-06 |
| AT4G15165 | chr4_8648283 | A/A | 0,54±0,09  | 0,26 | 9,47E-10 | 0.48±0.1   | 0,17 | 2,81E-06 |
| AT4G15260 | chr4_8726585 | G/G | 0,42±0,09  | 0,24 | 2,66E-06 | 0.74±0.12  | 0,30 | 5,81E-10 |
| AT4G15330 | chr4_8750023 | T/T | 0,56±0,08  | 0,17 | 1,11E-11 | 0.48±0.08  | 0,40 | 1,50E-08 |
| AT4G15620 | chr4_8964655 | G/G | -0,28±0,08 | 0,06 | 8,73E-04 | -0.37±0.1  | 0,43 | 1,24E-04 |
| AT4G15960 | chr4_9047261 | A/A | 0,74±0,11  | 0,12 | 1,79E-11 | 0.55±0.1   | 0,30 | 4,37E-08 |

|           |               |     |            |      |          |            |      |          |
|-----------|---------------|-----|------------|------|----------|------------|------|----------|
| AT4G16765 | chr4_9449963  | T/T | 0,37±0,11  | 0,21 | 4,08E-04 | 0.36±0.1   | 0,17 | 5,11E-04 |
| AT4G17010 | chr4_9577903  | G/G | 0,79±0,16  | 0,35 | 4,26E-07 | 0.34±0.12  | 0,36 | 5,29E-03 |
| AT4G17240 | chr4_9669316  | A/A | -0,64±0,08 | 0,10 | 2,63E-14 | -0.47±0.1  | 0,15 | 9,33E-07 |
| AT4G18220 | chr4_10086984 | A/A | -0,5±0,08  | 0,28 | 3,52E-09 | -0.36±0.1  | 0,41 | 3,01E-04 |
| AT4G18930 | chr4_10370636 | G/G | -0,85±0,11 | 0,15 | 1,27E-14 | -0.62±0.11 | 0,29 | 7,72E-09 |
| AT4G19100 | chr4_10453802 | C/C | 0,77±0,1   | 0,23 | 8,46E-14 | 0.64±0.15  | 0,07 | 1,21E-05 |
| AT4G19410 | chr4_10585609 | C/C | 0,54±0,09  | 0,06 | 2,99E-10 | 0.42±0.11  | 0,08 | 1,54E-04 |
| AT4G19510 | chr4_10621807 | T/T | -0,7±0,09  | 0,37 | 2,71E-15 | -0.21±0.1  | 0,29 | 3,53E-02 |
| AT4G19830 | chr4_10774193 | G/G | -0,66±0,08 | 0,11 | 8,27E-15 | -0.62±0.1  | 0,35 | 2,61E-10 |
| AT4G21320 | chr4_11374140 | T/T | -0,49±0,12 | 0,35 | 5,72E-05 | -0.37±0.1  | 0,28 | 1,40E-04 |
| AT4G21410 | chr4_11392164 | G/G | 0,25±0,09  | 0,25 | 4,60E-03 | 0.46±0.1   | 0,07 | 1,90E-06 |
| AT4G21460 | chr4_11432573 | T/T | 0,59±0,14  | 0,24 | 1,37E-05 | 0.68±0.1   | 0,07 | 4,06E-12 |
| AT4G21480 | chr4_11432573 | T/T | -0,57±0,14 | 0,06 | 2,62E-05 | -0.43±0.09 | 0,43 | 3,57E-06 |
| AT4G21630 | chr4_11464339 | T/T | 0,21±0,1   | 0,38 | 3,18E-02 | 0.48±0.09  | 0,20 | 4,52E-08 |
| AT4G21760 | chr4_11556660 | T/T | -0,58±0,08 | 0,09 | 5,39E-12 | -0.5±0.09  | 0,27 | 2,00E-08 |
| AT4G21900 | chr4_11621849 | T/T | 0,66±0,09  | 0,38 | 3,21E-14 | 0.48±0.1   | 0,14 | 7,30E-07 |
| AT4G22280 | chr4_11781527 | G/G | -0,6±0,09  | 0,28 | 2,93E-11 | -0.73±0.1  | 0,34 | 4,55E-13 |
| AT4G22960 | chr4_12030325 | A/A | -0,5±0,09  | 0,26 | 4,59E-09 | -0.42±0.09 | 0,29 | 1,70E-06 |
| AT4G23140 | chr4_12111816 | A/A | -0,57±0,12 | 0,19 | 9,53E-07 | -0.45±0.1  | 0,37 | 2,95E-06 |
| AT4G23200 | chr4_12145728 | C/C | -0,73±0,1  | 0,18 | 8,82E-13 | -0.68±0.1  | 0,34 | 5,23E-12 |
| AT4G23290 | chr4_11865007 | G/G | -0,64±0,15 | 0,07 | 2,05E-05 | -0.56±0.16 | 0,15 | 6,40E-04 |
| AT4G23300 | chr4_12173034 | T/T | 0,36±0,09  | 0,17 | 3,68E-05 | 0.24±0.1   | 0,43 | 1,42E-02 |
| AT4G23310 | chr4_12139678 | T/T | -0,43±0,08 | 0,21 | 2,69E-07 | -0.55±0.13 | 0,32 | 2,51E-05 |
| AT4G24175 | chr4_12703822 | T/T | -0,52±0,17 | 0,07 | 2,60E-03 | -0.46±0.13 | 0,36 | 4,44E-04 |
| AT4G25020 | chr4_12863500 | A/A | 0,48±0,09  | 0,08 | 2,64E-07 | 0.43±0.1   | 0,30 | 8,81E-06 |
| AT4G26170 | chr4_13290066 | C/C | 0,4±0,08   | 0,39 | 1,57E-06 | 0.18±0.09  | 0,29 | 4,92E-02 |
| AT4G26550 | chr4_13405154 | A/A | -0,64±0,17 | 0,55 | 1,73E-04 | -0.4±0.1   | 0,47 | 1,05E-04 |
| AT4G26555 | chr4_13407368 | G/G | -0,72±0,12 | 0,17 | 2,39E-09 | -0.48±0.11 | 0,28 | 5,06E-06 |
| AT4G27820 | chr4_13890471 | C/C | 0,34±0,12  | 0,08 | 3,74E-03 | 0.29±0.11  | 0,26 | 1,13E-02 |



|           |               |     |            |      |          |            |      |          |
|-----------|---------------|-----|------------|------|----------|------------|------|----------|
| AT4G28220 | chr4_13985272 | A/A | -0,57±0,08 | 0,08 | 1,37E-11 | -0.47±0.1  | 0,10 | 5,14E-06 |
| AT4G28706 | chr4_14169692 | A/A | 0,45±0,09  | 0,06 | 1,25E-06 | 0.4±0.1    | 0,40 | 3,75E-05 |
| AT4G29050 | chr4_14267639 | A/A | -0,41±0,09 | 0,19 | 2,34E-06 | -0.52±0.11 | 0,20 | 1,58E-06 |
| AT4G29540 | chr4_14499217 | T/T | 0,41±0,08  | 0,16 | 1,12E-06 | 0.24±0.1   | 0,17 | 1,11E-02 |
| AT4G29550 | chr4_14496442 | G/G | -0,46±0,08 | 0,39 | 2,82E-08 | -0.31±0.1  | 0,38 | 2,24E-03 |
| AT4G29890 | chr4_14584638 | G/G | 0,38±0,08  | 0,32 | 5,98E-06 | 0.52±0.1   | 0,30 | 6,68E-08 |
| AT4G31870 | chr4_15409973 | C/C | -0,67±0,09 | 0,06 | 1,25E-13 | -0.5±0.1   | 0,30 | 2,36E-07 |
| AT4G33360 | chr4_16069056 | T/T | -0,73±0,13 | 0,12 | 7,24E-09 | -0.72±0.1  | 0,37 | 1,02E-13 |
| AT4G33370 | chr4_15723466 | A/A | 0,34±0,09  | 0,08 | 4,95E-05 | 0.17±0.08  | 0,10 | 3,71E-02 |
| AT4G33410 | chr4_16084591 | A/A | -0,91±0,16 | 0,36 | 2,30E-08 | -0.6±0.1   | 0,09 | 7,66E-10 |
| AT4G36880 | chr4_17377423 | C/C | 0,43±0,09  | 0,54 | 2,01E-06 | 0.59±0.09  | 0,20 | 2,67E-10 |
| AT4G37150 | chr4_17494470 | T/T | 0,53±0,12  | 0,08 | 1,51E-05 | 0.76±0.1   | 0,42 | 1,57E-15 |
| AT4G37310 | chr4_17542308 | A/A | 0,77±0,13  | 0,06 | 6,48E-09 | 0.6±0.11   | 0,10 | 4,02E-08 |
| AT4G37925 | chr4_17842697 | A/A | 0,45±0,1   | 0,11 | 5,97E-06 | 0.27±0.12  | 0,29 | 2,39E-02 |
| AT4G38100 | chr4_17886739 | C/C | 0,58±0,08  | 0,49 | 5,57E-12 | 0.44±0.1   | 0,08 | 4,89E-06 |
| AT4G38460 | chr4_17799227 | A/A | -0,65±0,16 | 0,07 | 7,84E-05 | -0.76±0.13 | 0,48 | 1,41E-08 |
| AT4G38800 | chr4_18081582 | G/G | -0,4±0,12  | 0,06 | 9,79E-04 | -0.3±0.12  | 0,46 | 1,09E-02 |
| AT4G39390 | chr4_18316203 | T/T | 0,57±0,09  | 0,06 | 8,03E-11 | 0.48±0.1   | 0,33 | 9,02E-07 |
| AT4G39740 | chr4_18434232 | T/T | -0,68±0,16 | 0,07 | 1,41E-05 | -0.74±0.13 | 0,29 | 3,50E-08 |
| AT4G39920 | chr4_18528826 | T/T | 0,52±0,13  | 0,26 | 8,29E-05 | 0.42±0.11  | 0,22 | 2,15E-04 |
| AT5G01040 | chr5_33234    | A/A | -0,63±0,11 | 0,14 | 4,19E-09 | -0.47±0.11 | 0,32 | 2,08E-05 |
| AT5G02230 | chr5_448353   | T/T | -0,62±0,09 | 0,09 | 1,52E-12 | -0.63±0.1  | 0,28 | 8,00E-11 |
| AT5G02430 | chr5_526258   | T/T | 0,51±0,18  | 0,45 | 4,56E-03 | 0.44±0.13  | 0,33 | 4,46E-04 |
| AT5G02560 | chr5_575922   | T/T | 0,24±0,08  | 0,63 | 4,84E-03 | 0.45±0.1   | 0,41 | 3,56E-06 |
| AT5G02740 | chr5_621000   | C/C | -0,48±0,1  | 0,49 | 9,96E-07 | -0.55±0.1  | 0,18 | 1,85E-07 |
| AT5G03285 | chr5_793000   | G/G | -0,61±0,09 | 0,18 | 1,53E-12 | -0.32±0.1  | 0,17 | 1,86E-03 |
| AT5G03300 | chr5_798261   | T/T | 0,65±0,12  | 0,08 | 1,09E-07 | 0.53±0.14  | 0,17 | 2,20E-04 |
| AT5G03350 | chr5_818236   | T/T | 0,24±0,09  | 0,21 | 6,20E-03 | 0.43±0.1   | 0,15 | 2,11E-05 |
| AT5G03390 | chr5_839822   | G/G | -0,26±0,08 | 0,23 | 2,31E-03 | -0.56±0.1  | 0,28 | 2,45E-08 |

|           |               |     |            |      |          |            |      |          |
|-----------|---------------|-----|------------|------|----------|------------|------|----------|
| AT5G03495 | chr5_16706938 | G/G | 0,43±0,1   | 0,06 | 5,27E-06 | 0.41±0.08  | 0,12 | 1,53E-06 |
| AT5G04000 | chr5_1024769  | A/A | 0,56±0,11  | 0,55 | 8,73E-07 | 0.58±0.18  | 0,06 | 1,03E-03 |
| AT5G04220 | chr5_1288875  | G/G | -0,49±0,13 | 0,24 | 1,12E-04 | -0.28±0.1  | 0,07 | 5,90E-03 |
| AT5G05430 | chr5_1605316  | T/T | -0,49±0,08 | 0,41 | 2,21E-09 | -0.2±0.07  | 0,09 | 8,33E-03 |
| AT5G05890 | chr5_1771593  | C/C | -0,54±0,09 | 0,61 | 1,09E-08 | -0.39±0.1  | 0,39 | 4,90E-05 |
| AT5G06060 | chr5_1728043  | C/C | -0,43±0,14 | 0,07 | 1,69E-03 | -0.31±0.1  | 0,28 | 1,45E-03 |
| AT5G07000 | chr5_2182218  | G/G | -0,3±0,08  | 0,38 | 4,23E-04 | -0.37±0.11 | 0,36 | 1,04E-03 |
| AT5G08010 | chr5_2574913  | C/C | 0,4±0,09   | 0,45 | 3,22E-06 | 0.4±0.1    | 0,20 | 4,63E-05 |
| AT5G08360 | chr5_2762078  | T/T | 0,26±0,09  | 0,49 | 2,06E-03 | 0.25±0.1   | 0,11 | 1,20E-02 |
| AT5G08565 | chr5_2630270  | T/T | 0,43±0,11  | 0,55 | 6,22E-05 | 0.38±0.13  | 0,21 | 3,33E-03 |
| AT5G09840 | chr5_3058931  | C/C | 0,51±0,08  | 0,50 | 1,52E-09 | 0.36±0.1   | 0,13 | 3,43E-04 |
| AT5G10390 | chr5_3281886  | A/A | 0,61±0,1   | 0,08 | 1,93E-09 | 0.69±0.12  | 0,42 | 1,37E-08 |
| AT5G10400 | chr5_3272353  | A/A | -0,8±0,1   | 0,08 | 7,85E-17 | -0.85±0.12 | 0,42 | 9,51E-13 |
| AT5G10610 | chr5_3359832  | G/G | -0,4±0,08  | 0,57 | 2,79E-06 | -0.53±0.1  | 0,29 | 5,55E-07 |
| AT5G10620 | chr5_3356691  | A/A | -0,17±0,08 | 0,08 | 4,10E-02 | -0.59±0.11 | 0,29 | 4,19E-08 |
| AT5G11580 | chr5_3719036  | G/G | -0,85±0,12 | 0,31 | 6,39E-13 | -0.57±0.1  | 0,21 | 5,61E-08 |
| AT5G14680 | chr1_3381420  | T/T | -0,23±0,09 | 0,14 | 8,82E-03 | -0.48±0.1  | 0,07 | 5,07E-07 |
| AT5G15520 | chr5_5031656  | A/A | 0,47±0,14  | 0,42 | 1,20E-03 | 0.57±0.12  | 0,29 | 2,05E-06 |
| AT5G15760 | chr5_5142437  | G/G | 0,65±0,09  | 0,08 | 1,24E-12 | 0.42±0.1   | 0,42 | 1,00E-05 |
| AT5G16220 | chr5_5291565  | C/C | -0,61±0,08 | 0,63 | 4,67E-13 | -0.49±0.1  | 0,12 | 2,44E-06 |
| AT5G16350 | chr5_5554397  | A/A | 0,42±0,1   | 0,54 | 1,60E-05 | 0.3±0.11   | 0,43 | 4,93E-03 |
| AT5G17040 | chr5_5586708  | C/C | 0,81±0,14  | 0,50 | 6,95E-09 | 0.65±0.11  | 0,06 | 2,26E-09 |
| AT5G17780 | chr5_5868804  | A/A | 0,61±0,09  | 0,11 | 1,26E-11 | 0.45±0.1   | 0,21 | 2,71E-06 |
| AT5G18040 | chr5_5962646  | A/A | -0,21±0,09 | 0,14 | 1,38E-02 | -0.51±0.1  | 0,39 | 9,93E-08 |
| AT5G18290 | chr5_5939680  | A/A | -0,37±0,09 | 0,55 | 1,06E-05 | -0.24±0.11 | 0,06 | 2,64E-02 |
| AT5G18840 | chr5_6249990  | C/C | -0,45±0,1  | 0,08 | 4,07E-06 | -0.71±0.11 | 0,34 | 1,55E-11 |
| AT5G19180 | chr5_6454534  | A/A | -0,62±0,1  | 0,07 | 2,34E-10 | -0.41±0.11 | 0,44 | 2,08E-04 |
| AT5G19350 | chr5_6518623  | C/C | -0,57±0,09 | 0,26 | 2,77E-10 | -0.46±0.1  | 0,29 | 2,93E-06 |
| AT5G20420 | chr5_6960707  | T/T | -0,54±0,09 | 0,09 | 7,45E-10 | -0.31±0.09 | 0,28 | 6,25E-04 |

|           |               |     |            |      |          |            |      |          |
|-----------|---------------|-----|------------|------|----------|------------|------|----------|
| AT5G20580 | chr5_6969298  | T/T | 0,69±0,08  | 0,09 | 1,68E-16 | 0.52±0.1   | 0,07 | 1,16E-07 |
| AT5G20810 | chr5_6602468  | A/A | -0,63±0,16 | 0,06 | 6,28E-05 | -0.42±0.1  | 0,38 | 2,89E-05 |
| AT5G21060 | chr5_7157944  | A/A | -0,78±0,11 | 0,09 | 6,69E-12 | -0.73±0.1  | 0,09 | 3,43E-14 |
| AT5G22545 | chr5_7636152  | T/T | -0,66±0,16 | 0,40 | 4,87E-05 | -0.71±0.16 | 0,08 | 4,76E-06 |
| AT5G23020 | chr5_7718472  | G/G | -0,49±0,09 | 0,18 | 9,63E-09 | -0.4±0.1   | 0,44 | 4,24E-05 |
| AT5G23405 | chr5_7913147  | G/G | -0,63±0,09 | 0,09 | 5,03E-12 | -0.28±0.1  | 0,36 | 3,08E-03 |
| AT5G23850 | chr5_8046976  | G/G | -0,64±0,14 | 0,08 | 4,38E-06 | -0.39±0.17 | 0,06 | 2,53E-02 |
| AT5G23980 | chr5_8100470  | C/C | 0,67±0,13  | 0,11 | 1,66E-07 | 0.37±0.1   | 0,33 | 9,43E-05 |
| AT5G24450 | chr5_8346726  | T/T | -0,48±0,09 | 0,45 | 3,17E-07 | -0.41±0.1  | 0,25 | 2,30E-05 |
| AT5G24680 | chr5_8522452  | T/T | 0,52±0,11  | 0,06 | 1,65E-06 | 0.34±0.1   | 0,06 | 4,62E-04 |
| AT5G25230 | chr5_8736804  | G/G | 0,59±0,09  | 0,30 | 3,72E-11 | 0.34±0.08  | 0,27 | 1,76E-05 |
| AT5G25450 | chr5_8857203  | G/G | 0,85±0,13  | 0,25 | 5,34E-11 | 0.76±0.11  | 0,06 | 1,03E-11 |
| AT5G25470 | chr5_8815941  | T/T | 0,29±0,09  | 0,09 | 7,89E-04 | 0.45±0.09  | 0,17 | 8,26E-07 |
| AT5G25570 | chr5_8904831  | T/T | -0,1±0,16  | 0,12 | 1,10E-09 | -0.81±0.14 | 0,27 | 4,52E-09 |
| AT5G25640 | chr5_8968191  | G/G | 0,82±0,1   | 0,09 | 3,18E-16 | 0.72±0.1   | 0,47 | 6,50E-14 |
| AT5G26330 | chr5_9243133  | A/A | 0,45±0,09  | 0,21 | 9,81E-08 | 0.51±0.1   | 0,35 | 7,97E-08 |
| AT5G27010 | chr5_9499588  | T/T | 0,57±0,11  | 0,35 | 8,34E-08 | 0.57±0.08  | 0,49 | 1,77E-12 |
| AT5G27110 | chr5_9533635  | G/G | -0,45±0,09 | 0,09 | 1,93E-07 | -0.5±0.11  | 0,22 | 5,11E-06 |
| AT5G27210 | chr5_9559987  | C/C | -0,53±0,09 | 0,26 | 1,86E-09 | -0.41±0.1  | 0,23 | 9,90E-05 |
| AT5G27220 | chr5_9578927  | G/G | -0,44±0,09 | 0,42 | 2,06E-06 | -0.46±0.1  | 0,44 | 7,62E-06 |
| AT5G27230 | chr5_9600085  | T/T | 0,64±0,09  | 0,06 | 9,25E-12 | 0.46±0.1   | 0,09 | 2,38E-06 |
| AT5G27660 | chr5_9793385  | T/T | 0,4±0,09   | 0,08 | 1,16E-05 | 0.5±0.11   | 0,39 | 6,65E-06 |
| AT5G28010 | chr5_10018839 | A/A | 0,52±0,09  | 0,06 | 6,47E-09 | 0.32±0.1   | 0,36 | 6,60E-04 |
| AT5G28080 | chr5_10127627 | T/T | 0,48±0,09  | 0,12 | 1,65E-07 | 0.47±0.1   | 0,07 | 1,76E-06 |
| AT5G36260 | chr5_14288615 | C/C | -0,62±0,13 | 0,20 | 1,11E-06 | -0.47±0.09 | 0,45 | 4,59E-07 |
| AT5G36930 | chr5_14586136 | G/G | 0,67±0,16  | 0,20 | 3,08E-05 | 0.52±0.11  | 0,12 | 4,46E-06 |
| AT5G36940 | chr5_14626995 | T/T | 0,36±0,12  | 0,08 | 2,59E-03 | 0.64±0.11  | 0,06 | 8,70E-09 |
| AT5G37410 | chr5_14835977 | A/A | -0,75±0,09 | 0,28 | 6,76E-16 | -0.43±0.09 | 0,08 | 1,86E-06 |
| AT5G37530 | chr5_14906498 | A/A | -0,75±0,09 | 0,19 | 2,02E-17 | -0.42±0.1  | 0,25 | 1,26E-05 |

|           |               |     |            |      |          |            |      |          |
|-----------|---------------|-----|------------|------|----------|------------|------|----------|
| AT5G38020 | chr5_15185253 | A/A | 0,53±0,09  | 0,08 | 1,21E-09 | 0,28±0,1   | 0,18 | 3,52E-03 |
| AT5G38060 | chr5_15189206 | G/G | 0,53±0,09  | 0,11 | 2,22E-09 | 0,4±0,1    | 0,26 | 2,90E-05 |
| AT5G38250 | chr5_15282467 | A/A | -0,65±0,09 | 0,21 | 3,78E-12 | -0,56±0,1  | 0,35 | 1,75E-08 |
| AT5G38260 | chr5_15284523 | G/G | -0,6±0,09  | 0,14 | 1,99E-12 | -0,53±0,09 | 0,35 | 1,81E-08 |
| AT5G38280 | chr5_15284523 | G/G | -0,36±0,09 | 0,11 | 2,42E-05 | -0,39±0,1  | 0,45 | 6,30E-05 |
| AT5G40290 | chr5_16094398 | A/A | -0,3±0,09  | 0,18 | 6,65E-04 | -0,12±0,05 | 0,11 | 7,87E-03 |
| AT5G40820 | chr5_16363472 | G/G | 0,65±0,1   | 0,61 | 2,77E-10 | 0,55±0,1   | 0,11 | 1,54E-07 |
| AT5G41580 | chr5_16627887 | C/C | 0,64±0,09  | 0,14 | 1,39E-12 | 0,64±0,1   | 0,28 | 3,31E-11 |
| AT5G41690 | chr5_16674846 | A/A | -0,4±0,09  | 0,11 | 2,65E-06 | -0,39±0,09 | 0,28 | 2,36E-05 |
| AT5G41910 | chr5_16778517 | G/G | -0,63±0,08 | 0,09 | 1,41E-13 | -0,45±0,1  | 0,21 | 7,47E-06 |
| AT5G41950 | chr5_16780665 | T/T | -0,66±0,11 | 0,11 | 5,44E-10 | -0,4±0,11  | 0,21 | 2,09E-04 |
| AT5G42230 | chr5_16938554 | T/T | 0,31±0,12  | 0,10 | 8,83E-03 | 0,35±0,1   | 0,06 | 7,10E-04 |
| AT5G42250 | chr5_16911504 | C/C | -0,25±0,09 | 0,12 | 4,64E-03 | -0,36±0,1  | 0,08 | 1,90E-04 |
| AT5G42670 | chr5_17108687 | G/G | 0,61±0,1   | 0,24 | 2,31E-10 | 0,45±0,11  | 0,33 | 5,42E-05 |
| AT5G43070 | chr5_17290556 | A/A | 0,37±0,08  | 0,07 | 1,21E-05 | 0,31±0,1   | 0,23 | 1,55E-03 |
| AT5G43150 | chr5_17328573 | A/A | 0,44±0,09  | 0,06 | 1,25E-06 | 0,4±0,1    | 0,21 | 3,25E-05 |
| AT5G43620 | chr5_17521121 | T/T | -0,35±0,11 | 0,09 | 1,19E-03 | -0,36±0,09 | 0,06 | 1,35E-04 |
| AT5G43660 | chr5_17541491 | A/A | -0,59±0,09 | 0,06 | 3,51E-12 | -0,27±0,09 | 0,28 | 1,78E-03 |
| AT5G43725 | chr5_17560566 | G/G | 0,45±0,09  | 0,08 | 1,32E-06 | 0,24±0,1   | 0,45 | 1,52E-02 |
| AT5G44080 | chr5_17826554 | A/A | -0,32±0,13 | 0,06 | 1,17E-02 | -0,71±0,16 | 0,14 | 6,36E-06 |
| AT5G44568 | chr5_17961505 | A/A | 0,47±0,09  | 0,16 | 3,20E-08 | 0,58±0,1   | 0,41 | 1,64E-09 |
| AT5G44582 | chr5_17979016 | G/G | 0,63±0,1   | 0,11 | 8,96E-10 | 0,38±0,19  | 0,49 | 4,78E-02 |
| AT5G45040 | chr5_18173199 | G/G | -0,67±0,09 | 0,25 | 2,09E-14 | -0,6±0,1   | 0,28 | 1,16E-09 |
| AT5G45510 | chr5_18428369 | A/A | -0,6±0,08  | 0,29 | 8,88E-13 | -0,46±0,1  | 0,28 | 1,82E-06 |
| AT5G45610 | chr5_18503730 | C/C | -0,58±0,09 | 0,26 | 9,59E-12 | -0,39±0,1  | 0,26 | 5,85E-05 |
| AT5G45730 | chr5_18557137 | A/A | 0,7±0,12   | 0,23 | 2,16E-09 | 0,44±0,1   | 0,35 | 4,58E-06 |
| AT5G46720 | chr5_19422222 | G/G | -0,27±0,09 | 0,09 | 2,62E-03 | -0,51±0,15 | 0,50 | 7,06E-04 |
| AT5G47310 | chr5_19191911 | A/A | -0,39±0,09 | 0,41 | 4,90E-06 | -0,62±0,15 | 0,06 | 4,32E-05 |
| AT5G47510 | chr5_19280669 | T/T | -0,63±0,1  | 0,31 | 3,94E-10 | -0,61±0,14 | 0,25 | 5,80E-06 |

|           |               |     |            |      |          |            |      |          |
|-----------|---------------|-----|------------|------|----------|------------|------|----------|
| AT5G47760 | chr5_19356640 | G/G | -0,44±0,08 | 0,08 | 1,68E-07 | -0.55±0.1  | 0,43 | 1,52E-07 |
| AT5G47770 | chr5_19351286 | T/T | 0,33±0,09  | 0,08 | 1,63E-04 | 0.45±0.1   | 0,34 | 4,35E-06 |
| AT5G47810 | chr5_19348410 | T/T | 0,64±0,08  | 0,09 | 5,91E-14 | 0.7±0.1    | 0,17 | 6,36E-12 |
| AT5G48020 | chr5_19520266 | A/A | -0,44±0,09 | 0,60 | 1,88E-06 | -0.41±0.1  | 0,14 | 1,92E-05 |
| AT5G48340 | chr5_19586453 | C/C | -0,76±0,1  | 0,46 | 1,07E-14 | -0.39±0.1  | 0,19 | 4,46E-05 |
| AT5G48530 | chr5_19669066 | T/T | -0,57±0,09 | 0,14 | 3,06E-11 | -0.47±0.1  | 0,21 | 8,53E-06 |
| AT5G48560 | chr5_19688573 | G/G | 0,51±0,09  | 0,18 | 5,83E-08 | 0.32±0.1   | 0,36 | 2,06E-03 |
| AT5G49970 | chr5_20343995 | A/A | -0,42±0,09 | 0,05 | 6,35E-07 | -0.43±0.1  | 0,21 | 8,95E-06 |
| AT5G50350 | chr5_20495953 | T/T | -0,68±0,1  | 0,16 | 2,02E-12 | -0.41±0.1  | 0,36 | 2,71E-05 |
| AT5G50950 | chr5_20802283 | C/C | -0,36±0,09 | 0,05 | 6,26E-05 | -0.42±0.1  | 0,07 | 1,52E-05 |
| AT5G51470 | chr5_20906654 | G/G | 0,75±0,09  | 0,46 | 1,94E-17 | 0.62±0.09  | 0,42 | 2,45E-12 |
| AT5G52190 | chr5_21202402 | G/G | -0,88±0,12 | 0,13 | 2,46E-14 | -0.78±0.1  | 0,08 | 1,49E-14 |
| AT5G53970 | chr5_21914245 | A/A | -0,54±0,08 | 0,16 | 2,08E-10 | -0.46±0.11 | 0,06 | 1,90E-05 |
| AT5G54400 | chr5_22092370 | G/G | 0,32±0,09  | 0,08 | 1,52E-04 | 0.25±0.1   | 0,16 | 9,68E-03 |
| AT5G54960 | chr5_22310411 | A/A | 0,36±0,09  | 0,07 | 4,63E-05 | 0.52±0.11  | 0,36 | 1,82E-06 |
| AT5G55460 | chr5_22460639 | A/A | -0,95±0,16 | 0,24 | 6,82E-09 | -0.9±0.16  | 0,07 | 4,66E-08 |
| AT5G56020 | chr5_22689472 | T/T | -0,71±0,16 | 0,09 | 1,56E-05 | -0.6±0.13  | 0,09 | 5,40E-06 |
| AT5G56100 | chr5_22707349 | G/G | -0,49±0,1  | 0,42 | 4,34E-07 | -0.49±0.1  | 0,36 | 6,06E-07 |
| AT5G56370 | chr5_22860221 | G/G | -0,52±0,09 | 0,06 | 5,09E-09 | -0.47±0.09 | 0,25 | 4,27E-08 |
| AT5G57230 | chr5_23193315 | G/G | 0,49±0,09  | 0,10 | 3,80E-08 | 0.33±0.1   | 0,16 | 6,38E-04 |
| AT5G58980 | chr5_23809336 | C/C | 0,72±0,1   | 0,07 | 1,76E-13 | 0.52±0.13  | 0,10 | 1,18E-04 |
| AT5G60340 | chr5_24275857 | G/G | -0,61±0,09 | 0,41 | 5,63E-11 | -0.61±0.1  | 0,43 | 2,45E-10 |
| AT5G61550 | chr5_24747219 | T/T | -0,69±0,09 | 0,11 | 9,29E-14 | -0.44±0.09 | 0,31 | 6,04E-07 |
| AT5G63520 | chr5_25435104 | G/G | -0,64±0,13 | 0,56 | 1,08E-06 | -0.54±0.18 | 0,11 | 2,94E-03 |
| AT5G63580 | chr5_25468341 | G/G | 0,43±0,08  | 0,44 | 4,34E-07 | 0.53±0.09  | 0,44 | 2,30E-09 |
| AT5G64630 | chr5_25833100 | G/G | 0,75±0,11  | 0,39 | 3,31E-12 | 0.57±0.1   | 0,18 | 1,35E-08 |
| AT5G66080 | chr5_26424978 | G/G | -0,52±0,08 | 0,08 | 8,13E-10 | -0.44±0.1  | 0,25 | 1,59E-05 |
| AT5G66480 | chr5_26549786 | T/T | -0,82±0,17 | 0,06 | 1,87E-06 | -0.44±0.12 | 0,07 | 2,12E-04 |
| AT5G66490 | chr5_26549786 | T/T | -0,83±0,17 | 0,06 | 1,18E-06 | -0.81±0.12 | 0,07 | 2,35E-11 |

|           |               |     |            |      |          |            |      |          |
|-----------|---------------|-----|------------|------|----------|------------|------|----------|
| AT5G66840 | chr5_26746223 | T/T | 0,62±0,1   | 0,07 | 2,03E-10 | 0.63±0.17  | 0,32 | 2,91E-04 |
| AT5G67290 | chr5_26846358 | A/A | -0,62±0,1  | 0,33 | 2,22E-09 | -0.45±0.1  | 0,36 | 5,74E-06 |
| AT5G67540 | chr5_26944169 | A/A | 0,7±0,12   | 0,35 | 1,06E-08 | 0.47±0.1   | 0,46 | 2,72E-06 |
| AT3G16390 | chr3_5568916  | C/C | 0,99±0,16  | 0,31 | 1,39E-09 | 0.83±0.11  | 0,29 | 2,94E-14 |
| AT3G16390 | chr5_5855701  | T/T | 0,32±0,09  | 0,08 | 3,66E-04 | 0.33±0.1   | 0,07 | 5,11E-04 |
| AT3G32920 | chr1_10008048 | A/A | 0,28±0,12  | 0,15 | 2,21E-02 | 0.17±0.07  | 0,25 | 1,53E-02 |
| AT3G32920 | chr3_13416069 | A/A | 0,93±0,12  | 0,24 | 6,77E-14 | 0.57±0.08  | 0,28 | 3,51E-14 |
| AT3G32920 | chr3_13416069 | A/A | 0,93±0,12  | 0,16 | 6,77E-14 | 0.57±0.08  | 0,30 | 3,51E-14 |
| AT3G43610 | chr3_15531245 | C/C | 0,63±0,1   | 0,20 | 6,09E-11 | 0.38±0.1   | 0,07 | 1,02E-04 |
| AT3G46900 | chr3_17269895 | A/A | -0,52±0,1  | 0,08 | 2,91E-07 | -0.48±0.09 | 0,24 | 2,94E-07 |
| AT3G50880 | chr3_18936789 | C/C | -0,39±0,09 | 0,07 | 2,57E-05 | -0.49±0.1  | 0,44 | 8,40E-07 |
| AT3G59190 | chr3_21884602 | T/T | 0,65±0,11  | 0,48 | 1,62E-08 | 0.7±0.13   | 0,06 | 7,86E-08 |
| AT4G02460 | chr4_1058973  | G/G | 0,59±0,11  | 0,47 | 4,22E-08 | 0.44±0.1   | 0,16 | 9,19E-06 |
| AT4G07410 | chr4_4214036  | A/A | -0,51±0,08 | 0,14 | 1,70E-09 | -0.43±0.1  | 0,29 | 3,83E-05 |
| AT4G27060 | chr4_13571820 | C/C | 0,63±0,11  | 0,54 | 2,64E-09 | 0.39±0.1   | 0,35 | 4,44E-05 |
| AT4G27070 | chr1_11506730 | C/C | 0,62±0,1   | 0,09 | 4,30E-10 | 0.61±0.1   | 0,35 | 2,33E-10 |
| AT4G27070 | chr4_13553783 | T/T | 0,66±0,1   | 0,19 | 6,14E-12 | 0.72±0.1   | 0,27 | 1,08E-13 |
| AT4G27080 | chr1_11506730 | C/C | 0,66±0,1   | 0,11 | 2,90E-11 | 0.41±0.1   | 0,06 | 2,44E-05 |
| AT4G27080 | chr4_13553783 | T/T | 0,7±0,1    | 0,49 | 3,56E-13 | 0.48±0.1   | 0,21 | 7,09E-07 |
| AT4G27080 | chr5_15243278 | T/T | 0,6±0,11   | 0,24 | 1,49E-07 | 0.49±0.1   | 0,12 | 4,12E-07 |
| AT5G24660 | chr1_14600466 | T/T | -0,7±0,09  | 0,06 | 2,86E-14 | -0.79±0.16 | 0,10 | 6,53E-07 |
| AT5G24660 | chr1_15575602 | G/G | 0,49±0,08  | 0,13 | 7,58E-09 | 0.74±0.15  | 0,16 | 1,21E-06 |
| AT5G24660 | chr5_8442551  | T/T | 0,3±0,1    | 0,43 | 1,97E-03 | 0.37±0.1   | 0,31 | 1,23E-04 |
| AT5G38590 | chr5_15453373 | C/C | 0,61±0,09  | 0,36 | 5,44E-12 | 0.55±0.11  | 0,06 | 9,03E-07 |
| AT5G44570 | chr5_17961505 | A/A | 0,37±0,08  | 0,08 | 1,24E-05 | 0.48±0.09  | 0,26 | 4,91E-07 |
| AT1G22403 | chr5_26850990 | T/T | 0,91±0,13  | 0,08 | 5,78E-12 | 0.56±0.1   | 0,33 | 9,28E-09 |
| AT5G66658 | chr1_13323173 | T/T | -0,2±0,1   | 0,06 | 4,55E-02 | -0.36±0.08 | 0,18 | 5,19E-06 |
| AT5G66658 | chr5_26609368 | C/C | -0,55±0,11 | 0,13 | 2,46E-07 | -0.43±0.08 | 0,07 | 3,55E-08 |
| AT1G27560 | chr1_9570009  | A/A | -0,4±0,09  | 0,07 | 4,74E-06 | -0.31±0.07 | 0,08 | 1,17E-05 |

|           |               |     |            |      |          |            |      |          |
|-----------|---------------|-----|------------|------|----------|------------|------|----------|
| AT1G31910 | chr1_11458878 | A/A | 0,65±0,08  | 0,09 | 7,18E-15 | 0.49±0.1   | 0,35 | 1,64E-06 |
| AT1G31910 | chr5_11997528 | A/A | -0,45±0,08 | 0,31 | 1,05E-07 | -0.43±0.1  | 0,35 | 9,55E-06 |
| AT1G65520 | chr1_24361666 | A/A | 0,28±0,09  | 0,38 | 1,21E-03 | 0.36±0.1   | 0,35 | 2,35E-04 |
| AT2G11000 | chr2_4347440  | G/G | 0,75±0,11  | 0,18 | 1,15E-11 | 0.66±0.1   | 0,44 | 2,25E-11 |
| AT2G20560 | chr2_8883614  | A/A | 0,39±0,09  | 0,08 | 4,57E-06 | 0.34±0.11  | 0,22 | 2,21E-03 |
| AT2G23110 | chr2_9840140  | T/T | 0,38±0,08  | 0,08 | 4,38E-06 | 0.45±0.1   | 0,23 | 1,14E-05 |
| AT2G25510 | chr1_2031544  | T/T | -0,54±0,1  | 0,41 | 1,15E-08 | -0.63±0.12 | 0,10 | 7,39E-08 |
| AT2G25510 | chr2_10847006 | C/C | -0,49±0,12 | 0,08 | 4,07E-05 | -0.51±0.1  | 0,24 | 8,59E-07 |
| AT2G29910 | chr2_12666437 | C/C | -0,49±0,12 | 0,31 | 7,17E-05 | -0.6±0.15  | 0,35 | 7,18E-05 |
| AT2G40240 | chr2_16810569 | A/A | -0,47±0,09 | 0,35 | 3,50E-08 | -0.52±0.1  | 0,20 | 5,84E-08 |
| AT2G41830 | chr2_17458181 | T/T | 0,74±0,11  | 0,19 | 3,93E-11 | 0.57±0.11  | 0,39 | 1,91E-07 |
| AT2G43535 | chr2_18071235 | T/T | -0,6±0,11  | 0,06 | 4,21E-08 | -0.53±0.1  | 0,06 | 2,39E-07 |
| AT3G01920 | chr3_319854   | A/A | 0,46±0,08  | 0,19 | 3,53E-08 | 0.44±0.1   | 0,27 | 3,79E-06 |
| AT3G04181 | chr3_1099944  | A/A | -0,82±0,11 | 0,31 | 2,30E-13 | -0.57±0.09 | 0,18 | 2,12E-10 |
| AT3G04181 | chr5_525023   | G/G | -0,8±0,15  | 0,09 | 6,74E-08 | -0.24±0.11 | 0,36 | 3,50E-02 |

<sup>a</sup>SNP: Overlapping SNP between the two datasets; <sup>b</sup>Genotype: Genotype at the coding allele in Schmitz-data; <sup>c</sup>a±SE: Additive effect ± Standard

Error; <sup>d</sup>MAF: Minor Allele Frequency; <sup>e</sup>P-value: nominal P-value from single-SNP association

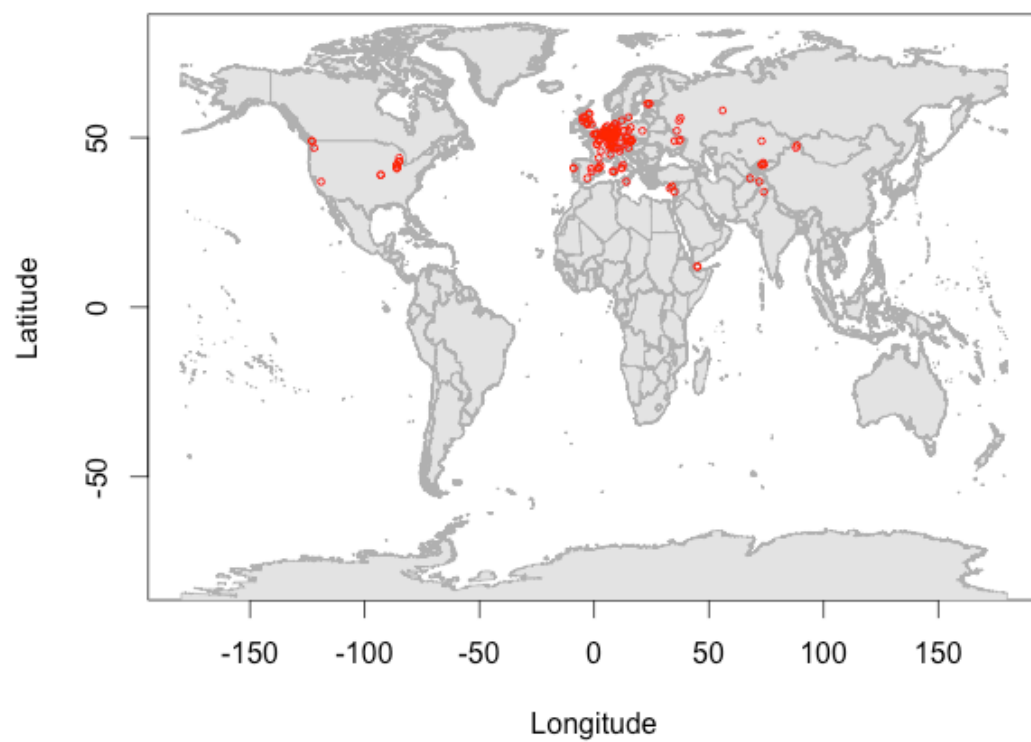

*Figure S1 Geographical locations of 140 accessions in Schmitz-data*
